# Supplementary material for: Synthesis of 2,4-diarylated pyrimidines enabled by Ni-catalyzed C–sulfone bond activation
Source: Royal Society of Chemistry journal article supplement (doi:10.1039/d2qo01935c), 2022-12-20
Supplement: d2qo01935c1.pdf [file d2qo01935c1.pdf]

## Supporting Information For

### Synthesis of 2,4-Diarylated Pyrimidines Enabled by Ni-catalyzed C-Sulfone Bond Activation

Qian Zhang,<sup>‡</sup> Wei Zhang,<sup>‡</sup> Ruoyan Cui, Yang Zhang\* and Dawen Niu\*

#### Table of Contents

|                                                                        |     |
|------------------------------------------------------------------------|-----|
| 1. General Information.....                                            | S2  |
| 2. General Procedure for the Ni-Catalyzed Cross-Coupling Reaction..... | S3  |
| 3. Condition Optimization.....                                         | S4  |
| 4. General Procedures for Control Experiments .....                    | S5  |
| 5. General Procedures for the Scale-Up Experiment .....                | S8  |
| 6. General Procedures for Pyrimidinyl Sulfone Electrophiles .....      | S9  |
| 7. Characterization Data for Compounds in Scheme 2 .....               | S17 |
| 8. Characterization Data for Compounds in Scheme 3 and 4 .....         | S35 |
| 9. References.....                                                     | S43 |
| 10. NMR Spectra .....                                                  | S44 |

## 1. General Information

Flash column chromatography was performed using silica gel (300-400 mesh) purchased from Qindao Haiyang. Ni(COD)<sub>2</sub>, PCy<sub>3</sub>·HBF<sub>4</sub>, dry THF and other dry solvents were purchased from Energy Chemicals or TCI Chemicals and used as received. Dry toluene was freshly distilled from sodium/benzophenone under N<sub>2</sub> atmosphere. Other ligands were purchased from Energy Chemicals, TCI Chemicals, or Sigma-Aldrich and used without further purification.

Unless otherwise noted, all reported yields of the reactions are isolated yields of purified products. NMR yields were determined by using 1,3,5-trimethoxybenzene as an internal standard. All new compounds were characterized by NMR spectroscopy, IR spectroscopy, high-resolution mass spectroscopy (HR-MS), and melting point (if solids). NMR spectra were recorded on a Bruker AMX 400 spectrometer and were calibrated using TMS (0.00 ppm) or residual deuterated solvent as an internal reference (CDCl<sub>3</sub>: 7.26 ppm for <sup>1</sup>H NMR and 77.16 ppm for <sup>13</sup>C NMR; (CD<sub>3</sub>)<sub>2</sub>SO: 2.50 ppm for <sup>1</sup>H NMR and 39.52 ppm for <sup>13</sup>C NMR), and the tabulated data were reported in ppm. IR spectra were taken on Thermo Scientific Nicolet iS5 spectrometer (iD5 ATR, diamond). HR-MS spectra were recorded on a Waters Q-TOF Premier. Melting points (m.p.) were recorded on an INESA SGW X-4 melting point apparatus.

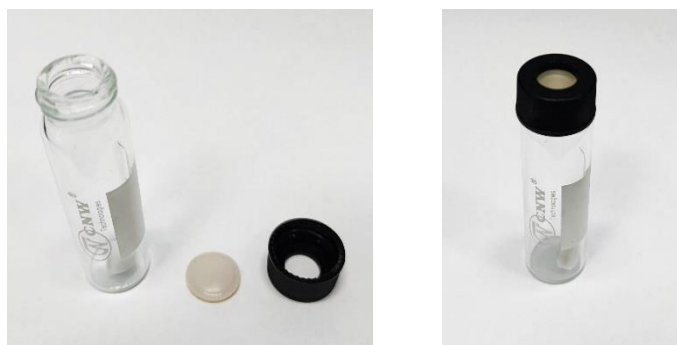

**Figure S1.** Reaction Vials (8 mL)

## 2. General Procedure for the Ni-Catalyzed Cross-Coupling Reaction

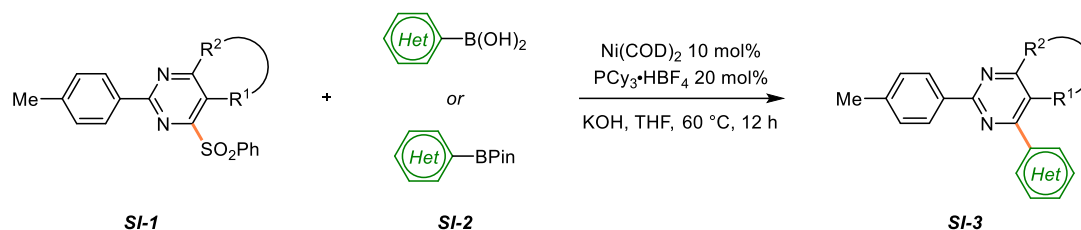

Pyrimidinyl sulfone **SI-1** (0.2 mmol, 1.0 equiv.), aryl boronic acid (or boronic acid pinacol ester) **SI-2** (0.4 mmol, 2.0 equiv.), and  $\text{Cy}_3\text{P} \cdot \text{HBF}_4$  (0.04 mmol, 20 mol%) were weighed into a dried screw-capped vial containing a magnetic stir bar. The vial was loosely capped and transferred into a nitrogen-filled glovebox. To the vial was sequentially added  $\text{Ni}(\text{COD})_2$  (0.02 mmol, 10 mol%), powderized KOH (0.4 mmol, 2.0 equiv.), and THF (0.1 M). The vial was tightly sealed with a Teflon-lined cap, and taken out of the glovebox. The mixture was stirred at 60 °C for 12 h. After completion, the reaction was cooled to room temperature, diluted with ethyl acetate (5 mL) and washed with saturated  $\text{NH}_4\text{Cl}$ . The aqueous phase was then extracted with ethyl acetate (10 mL $\times$ 3). The combined organic phases were dried over anhydrous  $\text{Na}_2\text{SO}_4$  and concentrated under reduced pressure. The residue was subjected to silica gel chromatography to give product **SI-3**.

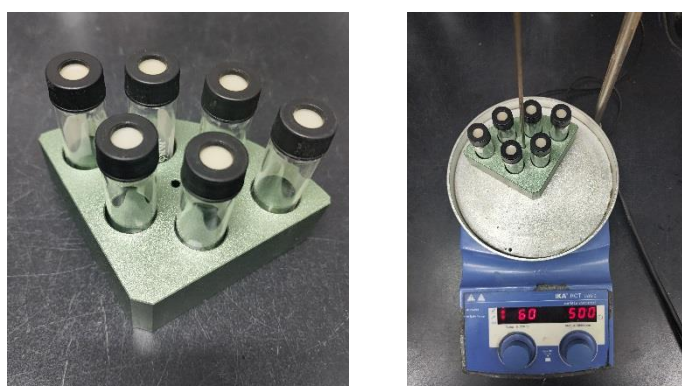

**Figure S2.** Reactor used in this study

### 3. Condition Optimization

**Table S1. Other Representative Conditions Not Listed in Table 1**

| entry           | Metal                              | Ligand                             | base                            | solvent | temperature | conversion of <b>13a</b> | yield of <b>15</b> |
|-----------------|------------------------------------|------------------------------------|---------------------------------|---------|-------------|--------------------------|--------------------|
| 1               | Pd(PPh <sub>3</sub> ) <sub>4</sub> | –                                  | K <sub>2</sub> CO <sub>3</sub>  | THF     | 40 °C       | 7%                       | 0%                 |
| 2               | NiBr <sub>2</sub>                  | PPh <sub>3</sub>                   | K <sub>2</sub> CO <sub>3</sub>  | THF     | 40 °C       | 17%                      | 0%                 |
| 3               | Ni(OTf) <sub>2</sub>               | PPh <sub>3</sub>                   | K <sub>2</sub> CO <sub>3</sub>  | THF     | 40 °C       | 22%                      | 0%                 |
| 4               | Ni(COD) <sub>2</sub>               | PPh <sub>3</sub>                   | K <sub>2</sub> CO <sub>3</sub>  | THF     | 40 °C       | 40%                      | 11%                |
| 5               | Ni(COD) <sub>2</sub>               | L1                                 | K <sub>2</sub> CO <sub>3</sub>  | THF     | 40 °C       | 7%                       | 0%                 |
| 6               | Ni(COD) <sub>2</sub>               | L2                                 | K <sub>2</sub> CO <sub>3</sub>  | THF     | 40 °C       | 10%                      | 0%                 |
| 7               | Ni(COD) <sub>2</sub>               | L3                                 | K <sub>2</sub> CO <sub>3</sub>  | THF     | 40 °C       | 8%                       | 0%                 |
| 8               | Ni(COD) <sub>2</sub>               | L4                                 | K <sub>2</sub> CO <sub>3</sub>  | THF     | 40 °C       | 22%                      | 3%                 |
| 9               | Ni(COD) <sub>2</sub>               | S-Phos                             | K <sub>2</sub> CO <sub>3</sub>  | THF     | 40 °C       | 43%                      | 4%                 |
| 10              | Ni(COD) <sub>2</sub>               | RuPhos                             | K <sub>2</sub> CO <sub>3</sub>  | THF     | 40 °C       | 26%                      | 5%                 |
| 11              | Ni(COD) <sub>2</sub>               | BINAP                              | K <sub>2</sub> CO <sub>3</sub>  | THF     | 40 °C       | 26%                      | 6%                 |
| 12              | Ni(COD) <sub>2</sub>               | dppm                               | K <sub>2</sub> CO <sub>3</sub>  | THF     | 40 °C       | 33%                      | 11%                |
| 13              | Ni(COD) <sub>2</sub>               | dpppe                              | K <sub>2</sub> CO <sub>3</sub>  | THF     | 40 °C       | 96%                      | 59%                |
| 14              | Ni(COD) <sub>2</sub>               | PCy <sub>3</sub>                   | K <sub>2</sub> CO <sub>3</sub>  | THF     | 40 °C       | 93%                      | 48%                |
| 15              | Ni(COD) <sub>2</sub>               | PCy <sub>3</sub> ·HBF <sub>4</sub> | Et <sub>3</sub> N               | THF     | 40 °C       | 48%                      | 25%                |
| 16              | Ni(COD) <sub>2</sub>               | PCy <sub>3</sub> ·HBF <sub>4</sub> | K <sub>3</sub> PO <sub>4</sub>  | THF     | 40 °C       | 59%                      | 48%                |
| 17              | Ni(COD) <sub>2</sub>               | PCy <sub>3</sub> ·HBF <sub>4</sub> | Na <sub>3</sub> PO <sub>4</sub> | THF     | 40 °C       | 10%                      | 8%                 |
| 18              | Ni(COD) <sub>2</sub>               | PCy <sub>3</sub> ·HBF <sub>4</sub> | KF                              | THF     | 40 °C       | 40%                      | 12%                |
| 19              | Ni(COD) <sub>2</sub>               | PCy <sub>3</sub> ·HBF <sub>4</sub> | <i>t</i> -BuOK                  | THF     | 40 °C       | 95%                      | 37%                |
| 20 <sup>b</sup> | Ni(COD) <sub>2</sub>               | PCy <sub>3</sub> ·HBF <sub>4</sub> | KOH                             | DCM     | 40 °C       | 15%                      | 4%                 |
| 21 <sup>b</sup> | Ni(COD) <sub>2</sub>               | PCy <sub>3</sub> ·HBF <sub>4</sub> | KOH                             | EA      | 40 °C       | 25%                      | 8%                 |
| 22 <sup>b</sup> | Ni(COD) <sub>2</sub>               | PCy <sub>3</sub> ·HBF <sub>4</sub> | KOH                             | MeCN    | 40 °C       | 40%                      | 20%                |
| 23 <sup>b</sup> | Ni(COD) <sub>2</sub>               | PCy <sub>3</sub> ·HBF <sub>4</sub> | KOH                             | dioxane | 40 °C       | 35%                      | 8%                 |
| 24 <sup>b</sup> | Ni(COD) <sub>2</sub>               | PCy <sub>3</sub> ·HBF <sub>4</sub> | KOH                             | THF     | 60 °C       | 82%                      | 77%                |
| 25 <sup>c</sup> | Ni(COD) <sub>2</sub>               | PCy <sub>3</sub> ·HBF <sub>4</sub> | KOH                             | THF     | 60 °C       | 100%                     | 87%                |
| 26 <sup>d</sup> | Ni(COD) <sub>2</sub>               | PCy <sub>3</sub> ·HBF <sub>4</sub> | KOH                             | THF     | 60 °C       | 20%                      | 0%                 |

<sup>a</sup> Unless otherwise specified, Reactions in this **Table S1** were performed under a N<sub>2</sub> atmosphere, using **13a** (0.05 mmol, 1.0 equiv.), **14** (0.10 mmol, 2.0 equiv.), and solvent (0.5 mL) for 12 h. Yield and conversion were determined by <sup>1</sup>H NMR using 1,3,5-trimethoxybenzene as internal standard. <sup>b</sup> **14** (0.075 mmol, 1.5 equiv.), and KOH (0.075 mmol, 1.5 equiv.) was used. <sup>c</sup> Ni(COD)<sub>2</sub> (5 mol%), and PCy<sub>3</sub>·HBF<sub>4</sub> (10 mol%) was used. <sup>d</sup> Under air condition.

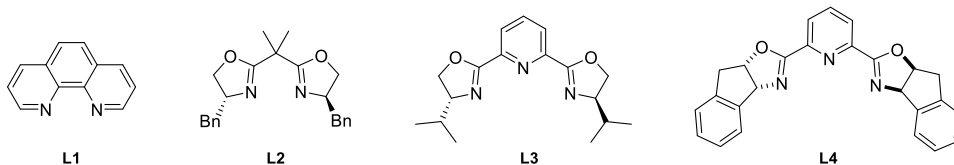

#### 4. General Procedures for Control Experiments

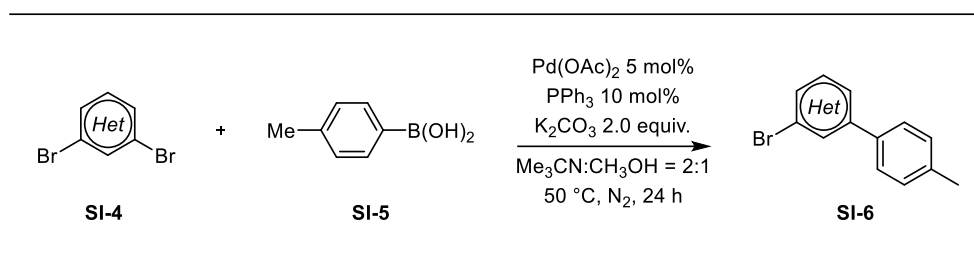

The reaction was prepared according to the literature reported.<sup>[1]</sup>

Dibromopyridine (**SI-4** 5.0 mmol), 4-tolylboronic acid (**SI-5**, 5.0 mmol, 1.0 equiv.),  $\text{K}_2\text{CO}_3$  (5.0 mmol, 2.0 equiv.),  $\text{Pd}(\text{OAc})_2$  (5 mol%),  $\text{PPh}_3$  (10 mol%) were weighed into a dried 50 mL thick wall pressure bottle containing a magnetic stir bar. The bottle was then transferred into a nitrogen-filled glovebox. The reaction mixture was dissolved in dried  $\text{CH}_3\text{CN}/\text{CH}_3\text{OH}$  (2:1). The round bottom flask was tightly sealed, and taken out of the glovebox. The thick wall pressure bottle was stirred at  $50\text{ }^\circ\text{C}$  under  $\text{N}_2$  atmosphere for 24 h. After completion, the reaction mixture was cooled to room temperature and the solid was filtered off. The filtrate was then concentrated and the resulting crude product was dissolved in DCM (30 mL). The solution was washed with water (10 mL $\times$ 3) and brine (10 mL $\times$ 1), and dried over  $\text{Na}_2\text{SO}_4$ . Upon removal of the solvent under vacuum, the resulting residue was subjected to flash silica gel column chromatography (petroleum ether/DCM) to give the desired product **SI-6**.

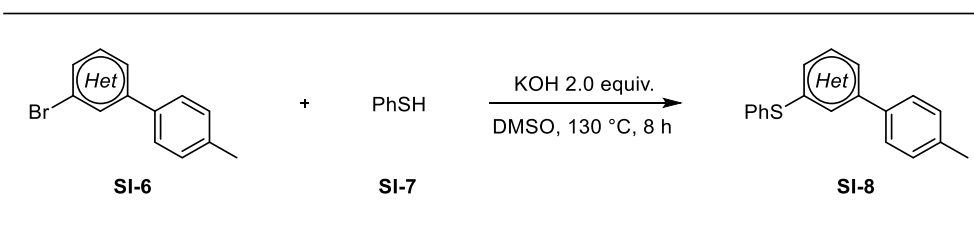

The reaction was prepared according to the literature reported.<sup>[2]</sup>

A sealable tube equipped with a magnetic stir bar was charged with the aryl bromide **SI-6** (4.0 mmol, 1.0 equiv.),  $\text{KOH}$  (8.0 mmol, 2.0 equiv.), and thiophenol **SI-7** (4.0 mmol, 1.0 equiv.). The reaction tube was loosely capped and transferred into a nitrogen-filled glovebox. Dry DMSO (10 mL) was added by syringe. The reaction tube was screw capped and put into a preheated oil bath ( $110\text{--}130\text{ }^\circ\text{C}$ ) for 8 h. The reaction mixture was then allowed to reach room

temperature before it was treated with DCM (5 mL) and H<sub>2</sub>O (10 mL). The aqueous phase was separated and extracted with DCM (3 x 5 mL), and the combined organic phase was washed with H<sub>2</sub>O (10 mL×3) and brine (10 mL×1), dried with Na<sub>2</sub>SO<sub>4</sub>, filtered and concentrated under reduced pressure. After removal of the solvent the residue was purified by flash column chromatography on silica gel (petroleum ether/DCM) to obtain the corresponding product **SI-8**.

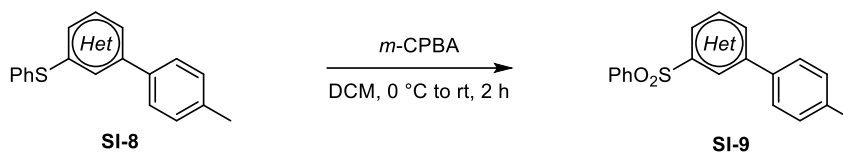

To a DCM solution (30 mL) of **SI-8** (4.0 mmol, 1.0 equiv.) cooled at 0 °C was added *m*-CPBA (9.6 mmol, 2.4 equiv.) dropwise over 10 min. The reaction was allowed to warm to room temperature and stirred for another 2h, and then diluted by addition of DCM. The mixture washed by sat. aq. NaHCO<sub>3</sub> (30 mL×2), and brine (10 mL×1). The mixture was extracted with DCM, and the combined organic layers were dried and concentrated in vacuo. The resulting residue was purified by flash column chromatography on silica gel (petroleum ether/EtOAc) to give Product **SI-9** as a white solid.

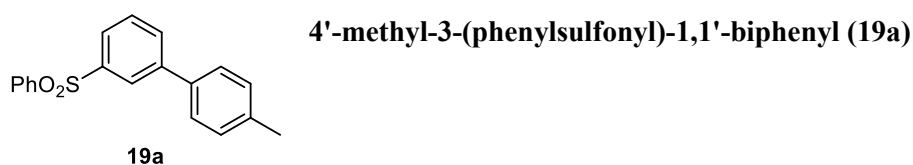

Following **General Procedure**, 1,3-dibromobenzene (5.0 mmol, 1.18 g) was used. Compound **19a** was isolated by silica gel chromatography (petroleum ether/EtOAc = 1/0 to 10/1) as a white solid (0.42 g, 3 steps yield 27%).

**<sup>1</sup>H NMR (400 MHz, CDCl<sub>3</sub>)** δ 8.15 (s, 1H), 7.97 (d, *J* = 6.8 Hz, 2H), 7.88 (d, *J* = 8.0 Hz, 1H), 7.74 (d, *J* = 7.6 Hz, 1H), 7.60–7.40 (m, 6H), 7.26 (d, *J* = 8.0 Hz, 2H), 2.39 (s, 3H). **<sup>13</sup>C NMR (101 MHz, CDCl<sub>3</sub>)** δ 142.6, 142.2, 141.7, 138.4, 136.3, 133.3, 131.6, 129.9, 129.8, 129.4, 127.7, 127.1, 126.1, 125.9, 21.2. **IR (thin film, cm<sup>-1</sup>):** 3083, 2917, 1587, 1547, 1445, 1313, 1270, 1159, 1133, 1083, 987, 798, and 758 cm<sup>-1</sup>. **m.p.:** 98.9–101.9 °C. **HRMS (DART-TOF)**

calculated for  $C_{19}H_{17}O_2S^+$   $[M+H]^+$   $m/z$  309.0944, found 309.0955.

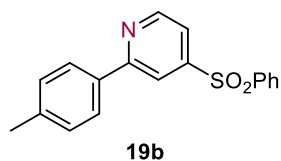

**4-(phenylsulfonyl)-2-(p-tolyl) pyridine (19b)**

Following **General Procedure**, 2,4-dibromopyridine (5.0 mmol, 1.18 g) was used. Compound **19b** was isolated by silica gel chromatography (petroleum ether/EtOAc = 1/0 to 5/1) as a white solid (0.52 g, 3 steps yield 34%).

**$^1H$  NMR (400 MHz,  $CDCl_3$ )**  $\delta$  8.83 (d,  $J$  = 5.2 Hz, 1H), 8.17 (s, 1H), 8.00 (d,  $J$  = 6.0 Hz, 2H), 7.92 (d,  $J$  = 8.0 Hz, 2H), 7.74–7.60 (m, 2H), 7.55 (t,  $J$  = 7.6 Hz, 2H), 7.30 (d,  $J$  = 8.0 Hz, 2H), 2.41 (s, 3H).  **$^{13}C$  NMR (101 MHz,  $CDCl_3$ )**  $\delta$  159.4, 151.0, 150.7, 140.5, 140.0, 135.0, 134.2, 129.9, 129.7, 128.2, 127.1, 118.5, 117.0, 21.5. **IR (thin film,  $cm^{-1}$ ):** 3059, 2920, 1611, 1575, 1551, 1447, 1387, 1323, 1270, 1158, 1110, 1080, 1018, 818, and 758  $cm^{-1}$ . **m.p.:** 106.8–109.8  $^{\circ}C$ . **HRMS (DART-TOF)** calculated for  $C_{18}H_{16}NO_2S^+$   $[M+H]^+$   $m/z$  310.0896, found 310.0909.

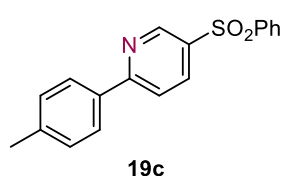

**5-(phenylsulfonyl)-2-(p-tolyl) pyridine (19c)**

Following **General Procedure**, 2,5-dibromopyridine (5.0 mmol, 1.18 g) was used. Compound **19c** was isolated by silica gel chromatography (petroleum ether/EtOAc = 1/0 to 5/1) as a light yellow solid (0.22 g, 3 steps yield 14%).

**$^1H$  NMR (400 MHz,  $CDCl_3$ )**  $\delta$  9.15 (d,  $J$  = 2.4 Hz, 1H), 8.21 (dd,  $J$  = 8.4, 2.4 Hz, 1H), 8.00 (d,  $J$  = 7.2 Hz, 2H), 7.92 (d,  $J$  = 8.0 Hz, 2H), 7.81 (d,  $J$  = 8.4 Hz, 1H), 7.60 (t,  $J$  = 7.2 Hz, 1H), 7.54 (t,  $J$  = 7.2 Hz, 2H), 7.29 (d,  $J$  = 8.0 Hz, 2H), 2.41 (s, 3H).  **$^{13}C$  NMR (101 MHz,  $CDCl_3$ )**  $\delta$  161.4, 148.9, 141.4, 141.0, 136.1, 135.9, 134.8, 133.8, 129.9, 129.7, 127.8, 127.5, 120.0, 21.5. **IR (thin film,  $cm^{-1}$ ):** 3059, 2925, 1579, 1555, 1465, 1447, 1371, 1323, 1309, 1278, 1260, 1160,

1116, 1078, 1011, 815, 765, 752 and 747  $\text{cm}^{-1}$ . **m.p.:** 177.1–180.1 °C. **HRMS (DART-TOF)** calculated for  $\text{C}_{18}\text{H}_{16}\text{NO}_2\text{S}^+$   $[\text{M}+\text{H}]^+$   $m/z$  310.0896, found 310.0906.

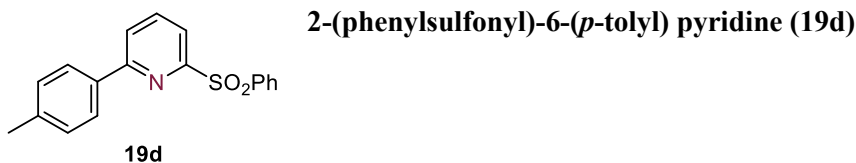

Following **General Procedure**, 2,6-dibromopyridine (5.0 mmol, 1.18 g) was used. Compound **19d** was isolated by silica gel chromatography (petroleum ether/EtOAc = 1/0 to 5/1) as a white solid (0.48 g, 3 steps yield 31%).

**$^1\text{H}$  NMR (400 MHz,  $\text{CDCl}_3$ )**  $\delta$  8.14 (d,  $J = 7.2$  Hz, 2H), 8.05 (d,  $J = 7.2$  Hz, 1H), 7.90 (t,  $J = 7.2$  Hz, 1H), 7.85–7.77 (m, 3H), 7.61–7.57 (m, 1H), 7.54–7.51 (m, 2H), 7.23 (d,  $J = 8.0$  Hz, 2H), 2.38 (s, 3H).  **$^{13}\text{C}$  NMR (101 MHz,  $\text{CDCl}_3$ )**  $\delta$  158.6, 158.1, 140.4, 139.1, 138.7, 134.4, 133.7, 129.7, 129.3, 129.0, 127.0, 122.9, 119.5, 21.4. **IR (thin film,  $\text{cm}^{-1}$ ):** 3062, 2917, 1595, 1472, 1446, 1304, 1270, 1154, 1105, 1074, 832, 793, 777, and 752  $\text{cm}^{-1}$ . **m.p.:** 143.2–146.2 °C. **HRMS (DART-TOF)** calculated for  $\text{C}_{18}\text{H}_{16}\text{NO}_2\text{S}^+$   $[\text{M}+\text{H}]^+$   $m/z$  310.0896, found 310.0897.

## 5. General Procedures for the Scale-Up Experiment

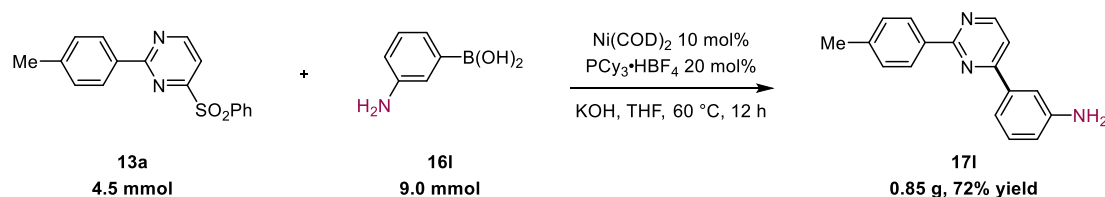

To a dried 100 mL thick wall pressure bottle equipped with a stir bar was added pyrimidinyl sulfone **13a** (1.40 g, 4.5 mmol, 1.0 equiv.), 3-Aminophenylboronic acid monohydrate **16i** (1.40 g, 9.0 mmol, 2.0 equiv.), and  $\text{PCy}_3\cdot\text{HBF}_4$  (0.33 g, 0.9 mmol, 0.2 equiv.). The bottle was loosely capped and transferred into a nitrogen-filled glovebox. To the thick wall pressure bottle was sequentially added  $\text{Ni}(\text{COD})_2$  (0.12 g, 0.45 mmol, 0.1 equiv.), powdered KOH (0.45 g, 9.0 mmol, 2.0 equiv.), and THF (45 mL, 0.1 M). The thick wall pressure bottle



was tightly sealed, and taken out of the glovebox. The mixture was stirred at preheated oil bath (60 °C) for 12 h. After completion, the reaction was cooled to room temperature, and removed the solvent under vacuum. The crude mixture was dissolved in EtOAc and washed with an aqueous solution of NH<sub>4</sub>Cl (30 mL×2), NaHCO<sub>3</sub> (30 mL×1), and brine (20 mL×1). The combined organic phases were dried over anhydrous Na<sub>2</sub>SO<sub>4</sub> and concentrated under reduced pressure. The residue was subjected to silica gel chromatography (SiO<sub>2</sub>, petroleum ether: EtOAc = 1:0 to 4:1) to give product **17I** as a white solid (0.85g, 72%).

## 6. General Procedures for Pyrimidinyl Sulfone Electrophiles

### 6.1 Procedures for the Synthesis of General Pyrimidinyl Sulfones

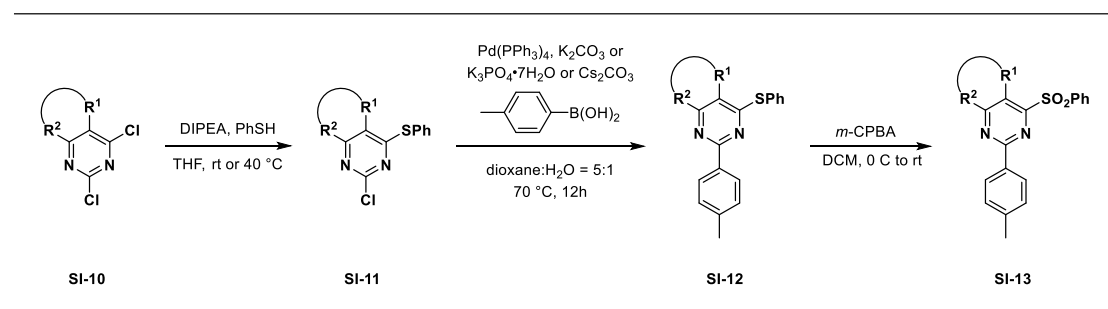

The reaction was prepared according to the literature reported.

Thiophenol (1.0 equiv.) was added dropwise to a stirred solution of DIPEA (1.2 equiv.) and 2,4-Dichloropyrimidine (**SI-10**, 1.0 equiv.) in THF at 0 °C. The reaction mixture was heated to 50 °C (or room temperature) overnight. After completion, the solvents were removed and the crude mixture was dissolved in EtOAc and washed with an aqueous solution of NH<sub>4</sub>Cl (30 mL×2), NaHCO<sub>3</sub> (30 mL×1), and brine (20 mL×1). The organic phase was collected, dried over anhydrous Na<sub>2</sub>SO<sub>4</sub>, filtered and concentrated. The crude residue was purified by flash column chromatography on silica gel (petroleum ether/EtOAc) to give the crude Product **SI-11**.<sup>[3]</sup>

The crude Product **SI-11** (1.0 equiv.), 4-tolylboronic acid (1.5 equiv.), base (K<sub>2</sub>CO<sub>3</sub>, or Cs<sub>2</sub>CO<sub>3</sub>, or K<sub>3</sub>PO<sub>4</sub>·7H<sub>2</sub>O, 2.0equiv.), were weighed into a dried 50 mL thick wall pressure bottle containing a magnetic stir bar. The bottle was then transferred into a nitrogen-filled glovebox. To the bottle was added Pd(PPh<sub>3</sub>)<sub>4</sub> (5 mol%) and solvent dioxane/ H<sub>2</sub>O (5:1). The thick wall pressure bottle was tightly sealed, and taken out of the glovebox. The solution was stirred at 70 °C under oil bath for 12 h. After completion, the reaction mixture was cooled to room

temperature and the solid was filtered off. The filtrate was then concentrated and the resulting crude product was dissolved in EtOAc (30 mL). The solution was washed with water (10 mL×3) and brine (10 mL×1), and dried over Na<sub>2</sub>SO<sub>4</sub>. Upon removal of the solvent under vacuum, the resulting residue was subjected to flash silica gel column chromatography (petroleum ether/EtOAc) to give the crude product **SI-12**.<sup>[4]</sup>

To a DCM solution of crude product **SI-12** (1.0 equiv.) cooled at 0 °C was added *m*-CPBA (2.4 equiv.) dropwise over 10 min. The reaction was allowed to warm to room temperature and stirred for another 2h, and then diluted by addition of DCM. The mixture washed by sat. aq. NaHCO<sub>3</sub> (30 mL×2), and brine (10 mL×1). The mixture was extracted with DCM, and the combined organic layers were dried over Na<sub>2</sub>SO<sub>4</sub> and concentrated in vacuo. The resulting residue was purified by flash column chromatography on silica gel (petroleum ether/EtOAc) to give Product **SI-13** as a white solid.

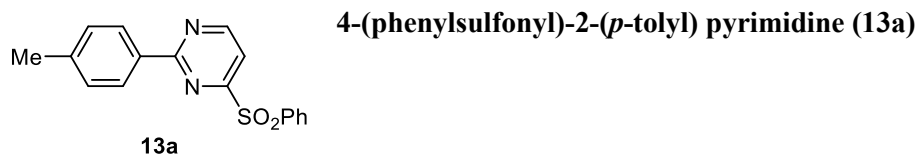

Following **General Procedure**, 2,4-dichloropyrimidine (10.0 mmol, 1.49 g) was used and the S<sub>N</sub>Ar reaction was react at 50 °C. The Suzuki reaction was use K<sub>3</sub>PO<sub>4</sub>·7H<sub>2</sub>O (20.0 mmol, 6.77 g) as base. Compound **13a** was isolated by silica gel chromatography (petroleum ether/EtOAc = 1/0 to 5/1) as a white solid (1.21 g, 3 steps yield 39%).

**<sup>1</sup>H NMR (400 MHz, CDCl<sub>3</sub>)** δ 9.04 (d, *J* = 4.8 Hz, 1H), 8.24 (d, *J* = 8.0 Hz, 2H), 8.15 (d, *J* = 7.2 Hz, 2H), 7.89 (d, *J* = 4.8 Hz, 1H), 7.67 (t, *J* = 7.6 Hz, 1H), 7.59 (t, *J* = 7.6 Hz, 2H), 7.26 (d, *J* = 8.0 Hz, 2H), 2.40 (s, 3H). **<sup>13</sup>C NMR (101 MHz, CDCl<sub>3</sub>)** δ 167.0, 165.7, 160.4, 142.5, 137.5, 134.6, 133.2, 129.7, 129.6, 129.3, 128.7, 114.4, 21.7 (d, *J* = 3.8 Hz). **IR (thin film, cm<sup>-1</sup>):** 3069, 3017, 2917, 1612, 1558, 1532, 1406, 1381, 1325, 1170, 1144, 751, 727, 592, and 579 cm<sup>-1</sup>. **m.p.:** 149.9–152.9 °C. **HRMS (DART-TOF)** calculated for C<sub>17</sub>H<sub>15</sub>N<sub>2</sub>O<sub>2</sub>S<sup>+</sup> [M+H]<sup>+</sup> *m/z* 311.0849, found 311.0850.

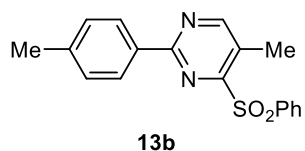

**5-methyl-4-(phenylsulfonyl)-2-(*p*-tolyl) pyrimidine (13b)**

Following **General Procedure**, 2,4-dichloro-5-methylpyrimidine (10.0 mmol, 1.63 g) was used and the S<sub>N</sub>Ar reaction was react at 50 °C. The Suzuki reaction was use K<sub>3</sub>PO<sub>4</sub>·7H<sub>2</sub>O (20.0 mmol, 6.77g) as base. Compound **13b** was isolated by silica gel chromatography (petroleum ether/EtOAc = 1/0 to 10/1) as a white solid (1.69 g, 3 steps yield 52%).

**<sup>1</sup>H NMR (400 MHz, CDCl<sub>3</sub>)** δ 8.75 (s, 1H), 8.08 (d, *J* = 7.6 Hz, 2H), 7.91 (d, *J* = 8.0 Hz, 2H), 7.74 (t, *J* = 7.6 Hz, 1H), 7.63 (t, *J* = 8.0 Hz, 2H), 7.16 (d, *J* = 8.0 Hz, 2H), 2.75 (s, 3H), 2.35 (s, 3H). **<sup>13</sup>C NMR (101 MHz, CDCl<sub>3</sub>)** δ 164.1, 162.3, 162.2, 141.8, 137.4, 134.2, 133.2, 130.1, 129.4, 128.9, 128.0, 125.4, 21.6 (d, *J* = 3.8 Hz), 15.2 (d, *J* = 3.6 Hz). **IR (thin film, cm<sup>-1</sup>):** 3005, 2984, 1696, 1570, 1516, 1420, 1307, 1275, 1261, 1152, 1110, 763, 749, and 690 cm<sup>-1</sup>. **m.p.:** 176.8–179.8 °C. **HRMS (DART-TOF)** calculated for C<sub>18</sub>H<sub>17</sub>N<sub>2</sub>O<sub>2</sub>S<sup>+</sup> [M+H]<sup>+</sup> *m/z* 325.1005, found 325.1012.

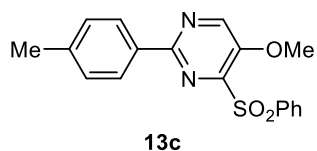

**5-methoxy-4-(phenylsulfonyl)-2-(*p*-tolyl) pyrimidine (13c)**

Following **General Procedure**, 2,4-dichloro-5-methoxypyrimidine (10.0 mmol, 1.79 g) was used and the S<sub>N</sub>Ar reaction was react at 50 °C. The Suzuki reaction was use Cs<sub>2</sub>CO<sub>3</sub> (20.0 mmol, 6.51g) as base. Compound **13c** was isolated by silica gel chromatography (petroleum ether/EtOAc = 1/0 to 5/1) as a white solid (1.09 g, 3 steps yield 32%).

**<sup>1</sup>H NMR (400 MHz, CDCl<sub>3</sub>)** δ 8.65 (s, 1H), 8.08 (d, *J* = 7.6 Hz, 2H), 7.94 (d, *J* = 8.0 Hz, 2H), 7.72 (t, *J* = 7.6 Hz, 1H), 7.61 (t, *J* = 7.6 Hz, 2H), 7.17 (d, *J* = 8.0 Hz, 2H), 4.08 (s, 3H), 2.36 (s, 3H). **<sup>13</sup>C NMR (101 MHz, CDCl<sub>3</sub>)** δ 156.7, 153.2, 148.4, 144.3, 141.0, 137.8, 134.2, 133.2, 130.0, 129.4, 128.9, 127.7, 57.2 (d, *J* = 5.4 Hz), 21.5 (d, *J* = 4.0 Hz). **IR (thin film, cm<sup>-1</sup>):** 3050, 3008, 2946, 2865, 1554, 1414, 1318, 1276, 1195, 1139, 1082, 1005, 764, 750, 690, and 579 cm<sup>-1</sup>. **m.p.:** 207.1–210.1 °C. **HRMS (DART-TOF)** calculated for C<sub>18</sub>H<sub>17</sub>N<sub>2</sub>O<sub>3</sub>S<sup>+</sup> [M+H]<sup>+</sup> *m/z* 341.0954, found 341.0950.

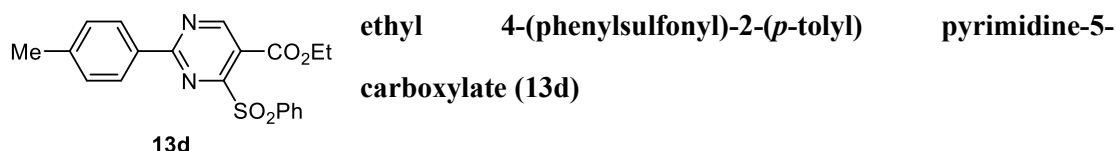

Following **General Procedure**, ethyl 2,4-dichloropyrimidine-5-carboxylate (10.0 mmol, 2.21 g) was used and the S<sub>N</sub>Ar reaction was react at room temperature. The Suzuki reaction was use K<sub>3</sub>PO<sub>4</sub>·7H<sub>2</sub>O (20.0 mmol, 6.51g) as base. Compound **13d** was isolated by silica gel chromatography (petroleum ether/EtOAc = 1/0 to 10/1) as a white solid (1.11 g, 3 steps yield 29%).

**<sup>1</sup>H NMR (400 MHz, CDCl<sub>3</sub>)** δ 9.16 (s, 1H), 8.12 (d, *J* = 7.2 Hz, 2H), 7.99 (d, *J* = 8.4 Hz, 2H), 7.72 (t, *J* = 7.6 Hz, 1H), 7.62 (t, *J* = 7.6 Hz, 2H), 7.20 (d, *J* = 8.0 Hz, 2H), 4.56 (q, *J* = 7.2 Hz, 2H), 2.38 (s, 3H), 1.50 (t, *J* = 7.2 Hz, 3H). **<sup>13</sup>C NMR (101 MHz, CDCl<sub>3</sub>)** δ 165.5, 164.8, 163.9, 160.1, 143.4, 137.6, 134.4, 132.4, 130.2, 129.7, 129.0, 129.0, 121.0, 63.2, 21.7 (d, *J* = 3.7 Hz), 14.1. **IR (thin film, cm<sup>-1</sup>):** 3069, 2986, 1730, 1564, 1511, 1426, 1328, 1305, 1260, 1154, 793, 751, 727, and 591 cm<sup>-1</sup>. **m.p.:** 92.1–95.1 °C. **HRMS (DART-TOF)** calculated for C<sub>20</sub>H<sub>19</sub>N<sub>2</sub>O<sub>4</sub>S<sup>+</sup> [M+H]<sup>+</sup> *m/z* 383.1060, found 383.1061.

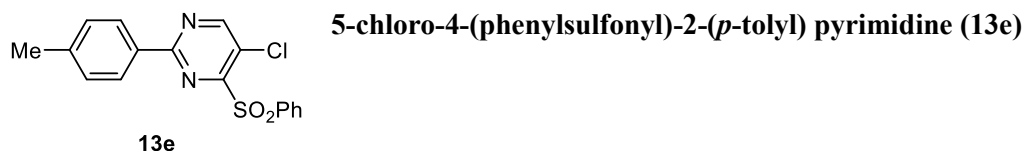

Following **General Procedure**, 2,4,5-trichloropyrimidine (10.0 mmol, 1.83 g) was used and the S<sub>N</sub>Ar reaction was react at room temperature. The Suzuki reaction was use K<sub>3</sub>PO<sub>4</sub>·7H<sub>2</sub>O (20.0 mmol, 6.51g) as base. Compound **13e** was isolated by silica gel chromatography (petroleum ether/EtOAc = 1/0 to 10/1) as a white solid (1.31 g, 3 steps yield 38%).

**<sup>1</sup>H NMR (400 MHz, CDCl<sub>3</sub>)** δ 8.84 (s, 1H), 8.10 (d, *J* = 7.6 Hz, 2H), 7.91 (d, *J* = 8.0 Hz, 2H), 7.76 (t, *J* = 7.6 Hz, 1H), 7.64 (t, *J* = 7.6 Hz, 2H), 7.17 (d, *J* = 8.0 Hz, 2H), 2.36 (s, 3H). **<sup>13</sup>C NMR (101 MHz, CDCl<sub>3</sub>)** δ 162.1, 161.7, 160.5, 142.7, 136.7, 134.6, 132.2, 130.2, 129.6, 129.1, 128.5, 124.5, 21.6 (d, *J* = 3.3 Hz). **IR (thin film, cm<sup>-1</sup>):** 3069, 3036, 2927, 1608, 1546, 1506, 1448, 1405, 1326, 1178, 1153, 1090, 779, 756, 727, 688, 594, and 588 cm<sup>-1</sup>. **m.p.:** 187.7–

190.7 °C. **HRMS (DART-TOF)** calculated for  $C_{17}H_{14}ClN_2O_2S^+$   $[M+H]^+$   $m/z$  345.0459, found 345.0454.

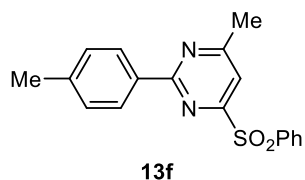

**4-methyl-6-(phenylsulfonyl)-2-(p-tolyl) pyrimidine (13f)**

Following **General Procedure**, 2,4-dichloro-6-methylpyrimidine (10.0 mmol, 1.63 g) was used and the  $S_NAr$  reaction was react at 50 °C. The Suzuki reaction was use  $Cs_2CO_3$  (20.0 mmol, 6.51g) as base. Compound **13f** was isolated by silica gel chromatography (petroleum ether/EtOAc = 1/0 to 10/1) as a white solid (0.62 g, 3 steps yield 19%).

**$^1H$  NMR (400 MHz,  $CDCl_3$ )**  $\delta$  8.25 (d,  $J = 8.0$  Hz, 2H), 8.14 (d,  $J = 7.2$  Hz, 2H), 7.77 (s, 1H), 7.65 (t,  $J = 7.6$  Hz, 1H), 7.57 (t,  $J = 7.6$  Hz, 2H), 7.24 (d,  $J = 8.0$  Hz, 2H), 2.67 (s, 3H), 2.39 (s, 3H).  **$^{13}C$  NMR (101 MHz,  $CDCl_3$ )**  $\delta$  171.1, 166.6, 165.2, 142.1, 137.7, 134.4, 133.5, 129.6, 129.4, 129.2, 128.7, 114.0, 25.0 (d,  $J = 3.2$  Hz), 21.6 (d,  $J = 3.1$  Hz). **IR (thin film,  $cm^{-1}$ ):** 3005, 2979, 1565, 1531, 1447, 1381, 1275, 1261, 1160, 764, 750, 604, and 579  $cm^{-1}$ . **m.p.:** 141.2–144.2 °C. **HRMS (DART-TOF)** calculated for  $C_{18}H_{17}N_2O_2S^+$   $[M+H]^+$   $m/z$  325.1005, found 325.1010.

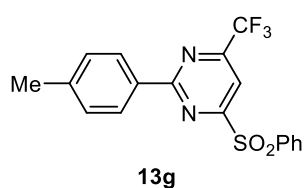

**4-(phenylsulfonyl)-2-(p-tolyl)-6-(trifluoromethyl) pyrimidine (13g)**

Following **General Procedure**, 2,4-dichloro-6-(trifluoromethyl)pyrimidine (10.0 mmol, 2.17 g) was used and the  $S_NAr$  reaction was react at 50 °C. The Suzuki reaction was use  $Cs_2CO_3$  (20.0 mmol, 6.51g) as base. Compound **13g** was isolated by silica gel chromatography (petroleum ether/EtOAc = 1/0 to 8/1) as a white solid (0.57 g, 3 steps yield 15%).

**$^1H$  NMR (400 MHz,  $CDCl_3$ )**  $\delta$  8.26 (d,  $J = 8.2$  Hz, 2H), 8.18–8.15 (m, 3H), 7.70 (t,  $J = 7.5$  Hz, 1H), 7.62 (t,  $J = 7.7$  Hz, 2H), 7.26 (d,  $J = 8.1$  Hz, 2H), 2.40 (s, 3H).  **$^{13}C$  NMR (101 MHz,**

**CDCl<sub>3</sub>**)  $\delta$  169.6, 166.6, 159.0 (q,  $J = 37.0$  Hz), 140.2 (d,  $J = 702.7$  Hz), 135.0, 131.9, 129.9, 129.8, 129.5, 129.1, 121.1 (d,  $J = 292.6$  Hz), 120.1 (d,  $J = 822.2$  Hz), 110.3 (d,  $J = 2.8$  Hz), 21.7 (d,  $J = 3.0$  Hz). **<sup>19</sup>F NMR (376 MHz, CDCl<sub>3</sub>)**  $\delta$  -69.85. **IR (thin film, cm<sup>-1</sup>):** 3069, 3006, 2989, 1564, 1549, 1386, 1331, 1275, 1210, 1156, 1085, 764, 750, 595, and 579 cm<sup>-1</sup>. **m.p.:** 144.3–147.3 °C. **HRMS (DART-TOF)** calculated for C<sub>18</sub>H<sub>14</sub>F<sub>3</sub>N<sub>2</sub>O<sub>2</sub>S<sup>+</sup> [M+H]<sup>+</sup> m/z 379.0723, found 379.0728.

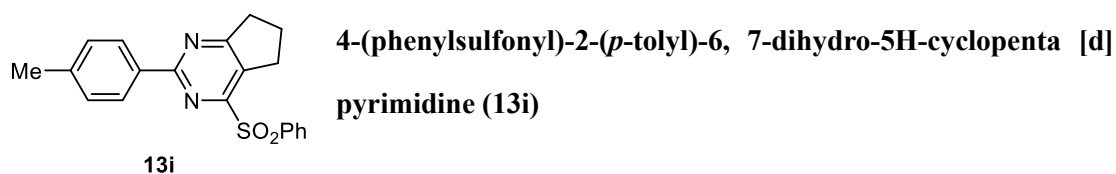

Following **General Procedure**, 2,4-dichloro-6-(trifluoromethyl)pyrimidine (10.0 mmol, 1.89 g) was used and the S<sub>N</sub>Ar reaction was react at 50 °C. The Suzuki reaction was use Cs<sub>2</sub>CO<sub>3</sub> (20.0 mmol, 6.51g) as base. Compound **13i** was isolated by silica gel chromatography (petroleum ether/EtOAc = 1/0 to 8/1) as a white solid (1.23 g, 3 steps yield 35%).

**<sup>1</sup>H NMR (400 MHz, CDCl<sub>3</sub>)**  $\delta$  8.13 (t,  $J = 7.6$  Hz, 4H), 7.67 (t,  $J = 7.6$  Hz, 1H), 7.58 (t,  $J = 7.6$  Hz, 2H), 7.21 (d,  $J = 8.0$  Hz, 2H), 3.45 (t,  $J = 7.6$  Hz, 2H), 3.09 (t,  $J = 8.0$  Hz, 2H), 2.38 (s, 3H), 2.23 (p,  $J = 7.6$  Hz, 2H). **<sup>13</sup>C NMR (101 MHz, CDCl<sub>3</sub>)**  $\delta$  180.7, 163.7, 160.6, 141.6, 138.1, 134.3, 133.7, 129.6, 129.4, 129.1, 128.4, 34.4, 29.3, 22.3, 21.6 (d,  $J = 3.5$  Hz). **IR (thin film, cm<sup>-1</sup>):** 3073, 2978, 1579, 1524, 1384, 1325, 1162, 1137, 1081, 775, 727, 687, and 593 cm<sup>-1</sup>. **m.p.:** 188.3–191.3 °C. **HRMS (DART-TOF)** calculated for C<sub>20</sub>H<sub>19</sub>N<sub>2</sub>O<sub>2</sub>S<sup>+</sup> [M+H]<sup>+</sup> m/z 351.1162, found 351.1161.

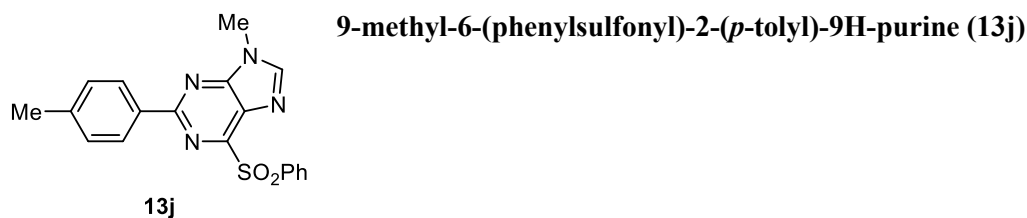

Following **General Procedure**, 2,6-dichloro-9-methyl-9H-purine (10.0 mmol, 2.03 g) was used and the S<sub>N</sub>Ar reaction was react at 50 °C. The Suzuki reaction was use K<sub>2</sub>CO<sub>3</sub> (20.0 mmol, 2.76 g) as base. Compound **13j** was isolated by silica gel chromatography (petroleum

ether/DCM/EtOAc = 1/0/0 to 0/4/1) as a white solid (1.53 g, 3 steps yield 42%).

**<sup>1</sup>H NMR (400 MHz, CDCl<sub>3</sub>)** δ 8.61 (d, *J* = 8.2 Hz, 2H), 8.23–8.21 (m, 3H), 7.65 (t, *J* = 7.4 Hz, 1H), 7.57 (t, *J* = 7.4 Hz, 2H), 7.30 (d, *J* = 8.0 Hz, 2H), 3.97 (s, 3H), 2.42 (s, 3H). **<sup>13</sup>C NMR (101 MHz, CDCl<sub>3</sub>)** δ 159.7, 155.2, 153.1, 147.4, 142.7, 138.7, 133.9, 131.7, 131.4, 130.2, 129.7, 129.6, 129.0, 30.5, 21.8. **IR (thin film, cm<sup>-1</sup>):** 3065, 3012, 2960, 1596, 1549, 1508, 1447, 1383, 1334, 1276, 1226, 1162, 1141, 1083, 763, 750, 725, 697, 685, 634, and 585 cm<sup>-1</sup>. **m.p.:** 191.5–194.5 °C. **HRMS (DART-TOF)** calculated for C<sub>19</sub>H<sub>17</sub>N<sub>4</sub>O<sub>2</sub>S<sup>+</sup> [M+H]<sup>+</sup> *m/z* 365.1067, found 365.1064.

## 6.2 Procedures for the Synthesis of N-phenyl-6-(phenylsulfonyl)-2-(*p*-tolyl)pyrimidin-4-amine (13h)

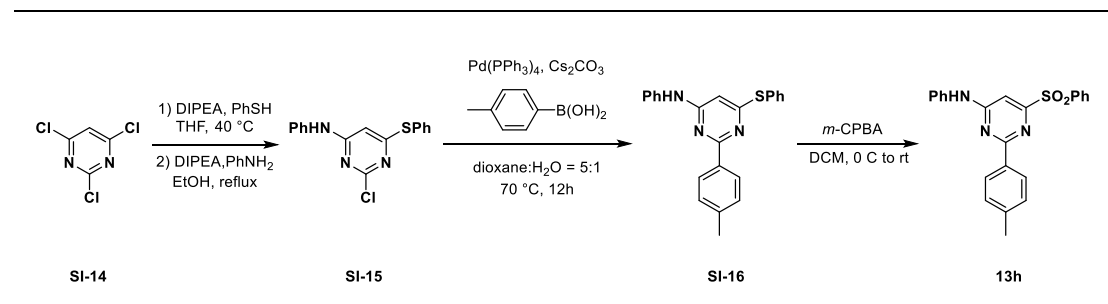

Thiophenol (1.0 equiv.) was added dropwise to a stirred solution of DIPEA (1.2 equiv.) and 2,4,6-trichloropyrimidine (SI-14, 1.0 equiv.) in THF at 0 °C. The reaction mixture was heated to 50 °C (or room temperature) overnight. After completion, the solvents were removed and the crude mixture was dissolved in EtOAc and washed with an aqueous solution of NH<sub>4</sub>Cl (30 mL×2), NaHCO<sub>3</sub> (30 mL×1), and brine (20 mL×1). The organic phase was collected, dried over anhydrous Na<sub>2</sub>SO<sub>4</sub>, filtered and concentrated. The crude residue was purified by flash column chromatography on silica gel (petroleum ether/EtOAc) to give the crude Product.<sup>[3]</sup>

The crude Product was added to a stirred solution of DIPEA (1.2 equiv.) and aniline (1.0 equiv.) in EtOH and refluxed for 8 h. After completion, the reaction was cooled to ambient temperature and removed the solvent by evaporation. The crude mixture was dissolved in EtOAc and washed with an aqueous solution of NH<sub>4</sub>Cl (30 mL×2), NaHCO<sub>3</sub> (30 mL×1), and brine (20 mL×1). The organic phase was collected, dried over anhydrous Na<sub>2</sub>SO<sub>4</sub>, filtered and concentrated. The crude residue was purified by flash column chromatography on silica gel

(petroleum ether/EtOAc) to give the crude Product **SI-15**.<sup>[5]</sup>

The crude Product **SI-15** (1.0 equiv.), 4-tolylboronic acid (1.5 equiv.), Cs<sub>2</sub>CO<sub>3</sub> (2.0 equiv.), were weighed into a dried 50 mL thick wall pressure bottle containing a magnetic stir bar. The bottle was then transferred into a nitrogen-filled glovebox. To the bottle was added Pd(PPh<sub>3</sub>)<sub>4</sub> (5 mmol%) and solvent dioxane/ H<sub>2</sub>O (5:1). The thick wall pressure bottle was tightly sealed, and taken out of the glovebox. The solution was stirred at 70 °C under oil bath for 12 h. After completion, the reaction mixture was cooled to room temperature and the solid was filtered off. The filtrate was then concentrated and the resulting crude product was dissolved in EtOAc (30 mL). The solution was washed with water (10 mL×3) and brine (10 mL×1), and dried over Na<sub>2</sub>SO<sub>4</sub>. Upon removal of the solvent under vacuum, the resulting residue was subjected to flash silica gel column chromatography (petroleum ether/EtOAc) to give the crude product **SI-16**.<sup>[4]</sup>

To a DCM solution of crude product **SI-16** (1.0 equiv.) cooled at 0 °C was added *m*-CPBA (2.4 equiv.) dropwise over 10 min. The reaction was allowed to warm to room temperature and stirred for another 2h, and then diluted by addition of DCM. The mixture washed by sat. aq. NaHCO<sub>3</sub> (30 mL×2), and brine (10 mL×1). The mixture was extracted with DCM, and the combined organic layers were dried over Na<sub>2</sub>SO<sub>4</sub> and concentrated in vacuo. The resulting residue was purified by flash column chromatography on silica gel (petroleum ether/EtOAc) to give Product **13h** as a white solid.

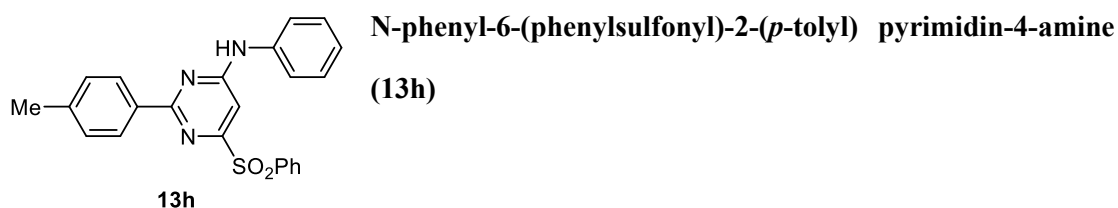

Following **General Procedure**, 2,4,6-trichloropyrimidine (10.0 mmol, 1.83 g) was used. Compound **13h** was isolated by silica gel chromatography (petroleum ether/DCM = 1/0 to 1/1) as a white solid (1.16 g, 4 steps yield 29%).

<sup>1</sup>H NMR (400 MHz, DMSO-*d*<sub>6</sub>) δ 10.30 (s, 1H), 8.13–8.10 (m, 4H), 7.80–7.76 (m, 3H), 7.71 (t, *J* = 7.6 Hz, 2H), 7.48 – 7.36 (m, 3H), 7.27 (d, *J* = 8.0 Hz, 2H), 7.12 (t, *J* = 7.6 Hz, 1H), 2.33



(s, 3H).  $^{13}\text{C}$  NMR (101 MHz, DMSO- $d_6$ )  $\delta$  164.2, 161.3, 141.4, 138.8, 137.5, 134.6, 133.7, 129.6, 129.3, 129.0, 128.9, 127.9, 123.5, 120.4, 21.0 (d,  $J = 3.5$  Hz). IR (thin film,  $\text{cm}^{-1}$ ): 3363, 3006, 2979, 1609, 1562, 1497, 1438, 1350, 1275, 1176, 1161, 764, 750, and 578  $\text{cm}^{-1}$ . m.p.: 240.6–243.6  $^\circ\text{C}$ . HRMS (DART-TOF) calculated for  $\text{C}_{23}\text{H}_{20}\text{N}_3\text{O}_2\text{S}^+$   $[\text{M}+\text{H}]^+$   $m/z$  402.1271, found 402.1271.

## 7. Characterization Data for Compounds in Scheme 2

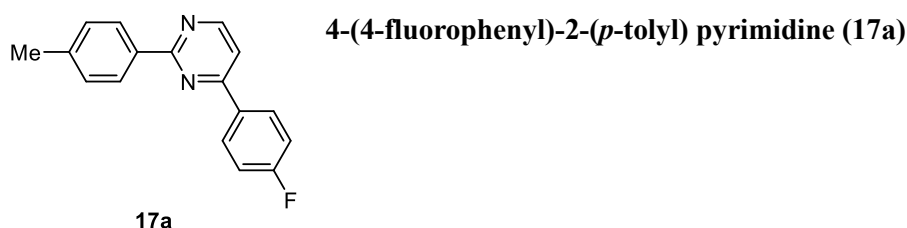

Following the **General Procedure**, pyrimidinyl sulfone **13a** (62.1 mg, 0.2 mmol), (4-fluorophenyl)boronic acid **16a** (56.0 mg, 0.4 mmol),  $\text{Ni}(\text{COD})_2$  (5.5 mg, 0.02 mmol),  $\text{PCy}_3 \cdot \text{HBF}_4$  (14.7 mg, 0.04 mmol),  $\text{KOH}$  (22.4 mg, 0.4 mmol), and THF (2.0 mL) were used. The residue was purification by flash chromatography ( $\text{SiO}_2$ , petroleum ether: EtOAc = 1:0 to 10:1) afforded the title product as a white solid (49.7 mg, 94%).

$^1\text{H}$  NMR (400 MHz,  $\text{CDCl}_3$ )  $\delta$  8.73 (d,  $J = 5.2$  Hz, 1H), 8.44 (d,  $J = 8.0$  Hz, 2H), 8.21–8.13 (m, 2H), 7.43 (d,  $J = 5.2$  Hz, 1H), 7.30 (d,  $J = 8.0$  Hz, 2H), 7.23–7.05 (m, 2H), 2.41 (s, 3H).  $^{13}\text{C}$  NMR (101 MHz,  $\text{CDCl}_3$ )  $\delta$  164.7 (d,  $J = 249.7$  Hz) 164.7, 163.5, 162.7, 157.9, 141.2, 135.3, 133.2 (d,  $J = 3.1$  Hz), 129.4, 129.3, 129.2, 128.3, 116.0 (d,  $J = 78.4$  Hz), 113.9, 21.6 (d,  $J = 3.9$  Hz).  $^{19}\text{F}$  NMR (376 MHz,  $\text{CDCl}_3$ )  $\delta$  -109.59. IR (thin film,  $\text{cm}^{-1}$ ): 2926, 2851, 1600, 1583, 1562, 1548, 1507, 1436, 1411, 1380, 1232, 1176, 1158, 949, 874, 821, 788, and 750  $\text{cm}^{-1}$ . m.p.: 87.3–90.3  $^\circ\text{C}$ . HRMS (DART-TOF) calculated for  $\text{C}_{17}\text{H}_{14}\text{FN}_2^+$   $[\text{M}+\text{H}]^+$   $m/z$  265.1136, found 265.1134.

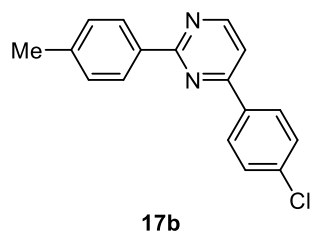

**4-(4-chlorophenyl)-2-(*p*-tolyl)pyrimidine (17b)**

Following the **General Procedure**, pyrimidinyl sulfone **13a** (62.1 mg, 0.2 mmol), (4-chlorophenyl)boronic acid **16b** (62.5 mg, 0.4 mmol), Ni(COD)<sub>2</sub> (5.5 mg, 0.02 mmol), PCy<sub>3</sub>·HBF<sub>4</sub> (14.7 mg, 0.04 mmol), KOH (22.4 mg, 0.4 mmol), and THF (2.0 mL) were used. The residue was purification by flash chromatography (SiO<sub>2</sub>, petroleum ether: EtOAc = 1:0 to 10:1) afforded the title product as a white solid (41.8 mg, 74%).

**<sup>1</sup>H NMR (400 MHz, CDCl<sub>3</sub>)** δ 8.78 (d, *J* = 5.2 Hz, 1H), 8.44 (d, *J* = 8.0 Hz, 2H), 8.13 (d, *J* = 8.4 Hz, 2H), 7.50–7.46 (m, 3H), 7.31 (d, *J* = 8.0 Hz, 2H), 2.43 (s, 3H). **<sup>13</sup>C NMR (101 MHz, CDCl<sub>3</sub>)** δ 164.8, 162.6, 158.1, 141.2, 137.2, 135.6, 135.1, 129.4, 129.3, 128.6, 128.4, 114.0, 21.6 (d, *J* = 4.0 Hz). **IR (thin film, cm<sup>-1</sup>):** 2998, 2922, 1582, 1560, 1544, 1489, 1437, 1404, 1265, 1175, 1108, 874, 817, 785, and 739 cm<sup>-1</sup>. **m.p.:** 144.8–147.8 °C. **HRMS (DART-TOF)** calculated for C<sub>17</sub>H<sub>14</sub>ClN<sub>2</sub><sup>+</sup> [M+H]<sup>+</sup> *m/z* 281.0840, found 281.0837.

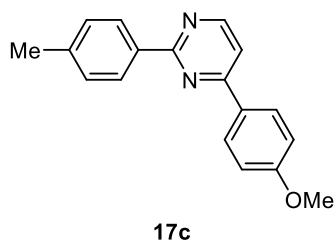

**4-(4-methoxyphenyl)-2-(*p*-tolyl) pyrimidine (17c)**

Following the **General Procedure**, pyrimidinyl sulfone **13a** (62.1 mg, 0.2 mmol), (4-methoxyphenyl)boronic acid **16c** (60.8 mg, 0.4 mmol), Ni(COD)<sub>2</sub> (5.5 mg, 0.02 mmol), PCy<sub>3</sub>·HBF<sub>4</sub> (14.7 mg, 0.04 mmol), KOH (22.4 mg, 0.4 mmol), and THF (2.0 mL) were used. The residue was purification by flash chromatography (SiO<sub>2</sub>, petroleum ether: EtOAc = 1:0 to 10:1) afforded the title product as a white solid (55.1 mg, 99%).

**<sup>1</sup>H NMR (400 MHz, CDCl<sub>3</sub>)** δ 8.71 (d, *J* = 5.2 Hz, 1H), 8.45 (d, *J* = 8.0 Hz, 2H), 8.16 (d, *J* = 8.8 Hz, 2H), 7.44 (d, *J* = 5.2 Hz, 1H), 7.30 (d, *J* = 8.0 Hz, 2H), 7.00 (d, *J* = 8.8 Hz, 2H), 3.85 (s, 3H), 2.42 (s, 3H). **<sup>13</sup>C NMR (101 MHz, CDCl<sub>3</sub>)** δ 164.5, 163.3, 162.1, 157.6, 140.9, 135.4,

129.5, 129.3, 128.8, 128.3, 114.3, 113.4, 55.5 (d,  $J = 5.7$  Hz), 21.6 (d,  $J = 4.4$  Hz). **IR (thin film,  $\text{cm}^{-1}$ ):** 2922, 2832, 1606, 1582, 1560, 1544, 1510, 1434, 1415, 1381, 1252, 1173, 822, 788, 765, and 748  $\text{cm}^{-1}$ . **m.p.:** 115.6–118.6 °C. **HRMS (DART-TOF)** calculated for  $\text{C}_{18}\text{H}_{17}\text{N}_2\text{O}^+$   $[\text{M}+\text{H}]^+$   $m/z$  277.1335, found 277.1333.

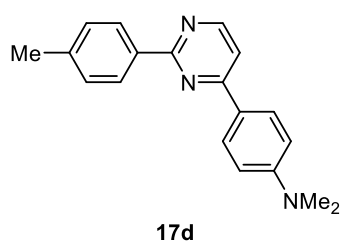

**N, N-dimethyl-4-(2-(*p*-tolyl) pyrimidin-4-yl) aniline (17d)**

Following the **General Procedure**, pyrimidinyl sulfone **13a** (62.1 mg, 0.2 mmol), (4-(dimethylamino)phenyl)boronic acid **16d** (66.0 mg, 0.4 mmol),  $\text{Ni}(\text{COD})_2$  (5.5 mg, 0.02 mmol),  $\text{PCy}_3 \cdot \text{HBF}_4$  (14.7 mg, 0.04 mmol),  $\text{KOH}$  (22.4 mg, 0.4 mmol), and THF (2.0 mL) were used. The residue was purification by flash chromatography ( $\text{SiO}_2$ , petroleum ether: EtOAc = 1:0 to 10:1) afforded the title product as a white solid (55.6 mg, 96%).

**$^1\text{H}$  NMR (400 MHz,  $\text{CDCl}_3$ )**  $\delta$  8.63 (d,  $J = 5.2$  Hz, 1H), 8.46 (d,  $J = 8.0$  Hz, 2H), 8.12 (d,  $J = 8.4$  Hz, 2H), 7.39 (d,  $J = 5.2$  Hz, 1H), 7.30 (d,  $J = 8.0$  Hz, 2H), 6.74 (d,  $J = 8.4$  Hz, 2H), 3.00 (s, 6H), 2.42 (s, 3H).  **$^{13}\text{C}$  NMR (101 MHz,  $\text{CDCl}_3$ )**  $\delta$  164.3, 163.7, 157.0, 152.4, 140.6, 135.8, 129.3, 128.4, 128.2, 124.2, 112.7, 111.8, 40.2 (d,  $J = 2.3$  Hz), 21.6 (d,  $J = 4.4$  Hz). **IR (thin film,  $\text{cm}^{-1}$ ):** 2922, 2850, 2803, 1608, 1581, 1560, 1540, 1520, 1424, 1330, 1288, 1197, 1174, 947, 874, 814, 786, 764, and 750  $\text{cm}^{-1}$ . **m.p.:** 189.1–192.1 °C. **HRMS (DART-TOF)** calculated for  $\text{C}_{19}\text{H}_{20}\text{N}_3^+$   $[\text{M}+\text{H}]^+$   $m/z$  290.1652, found 290.1651.

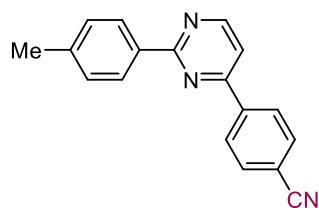

17e

**4-(2-(*p*-tolyl) pyrimidin-4-yl) benzonitrile (17e)**

Following the **General Procedure**, pyrimidinyl sulfone **13a** (62.1 mg, 0.2 mmol), (4-cyanophenyl)boronic acid **16e** (58.8 mg, 0.4 mmol), Ni(COD)<sub>2</sub> (5.5 mg, 0.02 mmol), PCy<sub>3</sub>·HBF<sub>4</sub> (14.7 mg, 0.04 mmol), KOH (22.4 mg, 0.4 mmol), and THF (2.0 mL) were used. The residue was purification by flash chromatography (SiO<sub>2</sub>, petroleum ether: EtOAc = 1:0 to 10:1) afforded the title product as a white solid (53.3 mg, 98%).

**<sup>1</sup>H NMR (400 MHz, CDCl<sub>3</sub>)** δ 8.85 (d, *J* = 5.2 Hz, 1H), 8.43 (d, *J* = 8.0 Hz, 2H), 8.28 (d, *J* = 8.0 Hz, 2H), 7.79 (d, *J* = 8.0 Hz, 2H), 7.53 (d, *J* = 5.2 Hz, 1H), 7.31 (d, *J* = 8.0 Hz, 2H), 2.43 (s, 3H). **<sup>13</sup>C NMR (101 MHz, CDCl<sub>3</sub>)** δ 165.0, 161.7, 158.5, 141.5, 141.2, 134.7, 132.7, 129.5, 128.4, 127.8, 118.5, 114.6, 114.3, 21.6 (d, *J* = 4.3 Hz). **IR (thin film, cm<sup>-1</sup>):** 2908, 1580, 1558, 1501, 1383, 1334, 1174, 949, 874, 819, 786, and 750 cm<sup>-1</sup>. **m.p.:** 163.2–165.2 °C. **HRMS (DART-TOF)** calculated for C<sub>18</sub>H<sub>14</sub>N<sub>3</sub><sup>+</sup> [M+H]<sup>+</sup> *m/z* 272.1182, found 272.1181.

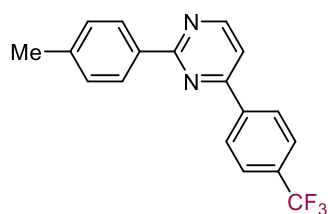

17f

**2-(*p*-tolyl)-4-(4-(trifluoromethyl) phenyl) pyrimidine (17f)**

Following the **General Procedure**, pyrimidinyl sulfone **13a** (62.1 mg, 0.2 mmol), (4-(trifluoromethyl)phenyl)boronic acid **16f** (76.0 mg, 0.4 mmol), Ni(COD)<sub>2</sub> (5.5 mg, 0.02 mmol), PCy<sub>3</sub>·HBF<sub>4</sub> (14.7 mg, 0.04 mmol), KOH (22.4 mg, 0.4 mmol), and THF (2.0 mL) were used. The residue was purification by flash chromatography (SiO<sub>2</sub>, petroleum ether: EtOAc = 1:0 to 10:1) afforded the title product as a white solid (62.0 mg, 99%).

**<sup>1</sup>H NMR (400 MHz, CDCl<sub>3</sub>)** δ 8.82 (d, *J* = 5.2 Hz, 1H), 8.45 (d, *J* = 8.4 Hz, 2H), 8.28 (d, *J* = 8.0 Hz, 2H), 7.76 (d, *J* = 8.4 Hz, 2H), 7.53 (d, *J* = 5.2 Hz, 1H), 7.31 (d, *J* = 8.0 Hz, 2H), 2.43 (s, 3H). **<sup>13</sup>C NMR (101 MHz, CDCl<sub>3</sub>)** δ 165.0, 162.4, 158.3, 141.4, 140.5, 134.9, 132.6 (q, *J*

= 32.4 Hz), 129.5, 128.4, 127.6, 126.0 (d,  $J = 11.3$  Hz), 126.0 (d,  $J = 3.8$  Hz), 124.1 (d,  $J = 270.6$  Hz), 124.1 (d,  $J = 812.2$  Hz), 114.6, 21.6 (d,  $J = 4.1$  Hz).  **$^{19}\text{F}$  NMR (376 MHz,  $\text{CDCl}_3$ )**  $\delta$  -62.77. **IR (thin film,  $\text{cm}^{-1}$ ):** 2998, 1585, 1560, 1496, 1391, 1329, 1175, 1131, 949, 874, 826, 790, 764, and 750  $\text{cm}^{-1}$ . **m.p.:** 155.1–158.1 °C. **HRMS (DART-TOF)** calculated for  $\text{C}_{18}\text{H}_{14}\text{F}_3\text{N}_2^+$   $[\text{M}+\text{H}]^+$   $m/z$  315.1104, found 315.1106.

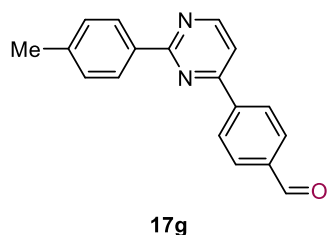

**4-(2-(*p*-tolyl) pyrimidin-4-yl) benzaldehyde (17g)**

Following the **General Procedure**, pyrimidinyl sulfone **13a** (62.1 mg, 0.2 mmol), (4-formylphenyl)boronic acid **16g** (60.0 mg, 0.4 mmol),  $\text{Ni}(\text{COD})_2$  (5.5 mg, 0.02 mmol),  $\text{PCy}_3 \cdot \text{HBF}_4$  (14.7 mg, 0.04 mmol),  $\text{KOH}$  (22.4 mg, 0.4 mmol), and THF (2.0 mL) were used. The residue was purification by flash chromatography ( $\text{SiO}_2$ , petroleum ether: EtOAc = 1:0 to 8:1) afforded the title product as a white solid (44.5 mg, 81%).

**$^1\text{H}$  NMR (400 MHz,  $\text{CDCl}_3$ )**  $\delta$  10.10 (s, 1H), 8.85 (d,  $J = 5.2$  Hz, 1H), 8.46 (d,  $J = 8.0$  Hz, 2H), 8.34 (d,  $J = 8.4$  Hz, 2H), 8.01 (d,  $J = 8.4$  Hz, 2H), 7.58 (d,  $J = 5.2$  Hz, 1H), 7.32 (d,  $J = 8.0$  Hz, 2H), 2.44 (s, 3H).  **$^{13}\text{C}$  NMR (101 MHz,  $\text{CDCl}_3$ )**  $\delta$  191.9 (d,  $J = 2.2$  Hz), 165.0, 162.4, 158.3, 142.6, 141.4, 137.8, 134.9, 130.2, 129.5, 128.4, 127.9, 114.9, 21.6 (d,  $J = 3.9$  Hz). **IR (thin film,  $\text{cm}^{-1}$ ):** 3008, 2927, 1690, 1582, 1559, 1547, 1503, 1380, 1299, 1172, 949, 874, 817, and 784  $\text{cm}^{-1}$ . **m.p.:** 137.9–140.9 °C. **HRMS (DART-TOF)** calculated for  $\text{C}_{18}\text{H}_{15}\text{N}_2\text{O}^+$   $[\text{M}+\text{H}]^+$   $m/z$  275.1179, found 275.1181.

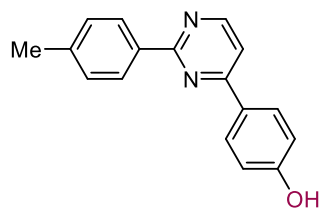

17h

**4-(2-(*p*-tolyl) pyrimidin-4-yl) phenol (17h)**

Following the **General Procedure**, pyrimidinyl sulfone **13a** (62.1 mg, 0.2 mmol), (4-hydroxyphenyl)boronic acid **16h** (55.2 mg, 0.4 mmol), Ni(COD)<sub>2</sub> (5.5 mg, 0.02 mmol), PCy<sub>3</sub>·HBF<sub>4</sub> (14.7 mg, 0.04 mmol), KOH (22.4 mg, 0.4 mmol), and THF (2.0 mL) were used. The residue was purification by flash chromatography (SiO<sub>2</sub>, petroleum ether: EtOAc = 1:0 to 8:1) afforded the title product as a white solid (45.2 mg, 78%).

**<sup>1</sup>H NMR (400 MHz, DMSO)** δ 10.14 (s, 1H), 8.79 (d, *J* = 5.2 Hz, 1H), 8.40 (d, *J* = 8.0 Hz, 2H), 8.21 (d, *J* = 8.4 Hz, 2H), 7.79 (d, *J* = 5.2 Hz, 1H), 7.33 (d, *J* = 8.0 Hz, 2H), 6.96 (d, *J* = 8.4 Hz, 2H), 2.37 (s, 3H). **<sup>13</sup>C NMR (101 MHz, DMSO)** δ 163.2, 162.8, 160.6, 158.0, 140.5, 135.0, 129.3, 128.9, 127.8, 127.0, 115.9, 113.5, 21.1 (d, *J* = 4.5 Hz). **IR (thin film, cm<sup>-1</sup>):** 3309, 3012, 2932, 1584, 1560, 1545, 1509, 1386, 1276, 1265, 1172, 949, 874, 825, 764, and 749 cm<sup>-1</sup>. **m.p.:** 210.3–213.3 °C. **HRMS (DART-TOF)** calculated for C<sub>17</sub>H<sub>15</sub>N<sub>2</sub>O<sup>+</sup> [M+H]<sup>+</sup> *m/z* 263.1179, found 263.1182.

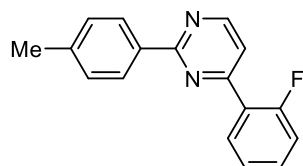

17i

**4-(2-(2-fluorophenyl)-2-(*p*-tolyl) pyrimidine (17i)**

Following the **General Procedure**, pyrimidinyl sulfone **13a** (62.1 mg, 0.2 mmol), (2-fluorophenyl)boronic acid **16i** (56.0 mg, 0.4 mmol), Ni(COD)<sub>2</sub> (5.5 mg, 0.02 mmol), PCy<sub>3</sub>·HBF<sub>4</sub> (14.7 mg, 0.04 mmol), KOH (22.4 mg, 0.4 mmol), and THF (2.0 mL) were used. The residue was purification by flash chromatography (SiO<sub>2</sub>, petroleum ether: EtOAc = 1:0 to 10:1) afforded the title product as a white solid (45.7 mg, 86%).

**<sup>1</sup>H NMR (400 MHz, CDCl<sub>3</sub>)** δ 8.80 (d, *J* = 5.2 Hz, 1H), 8.44 (d, *J* = 8.4 Hz, 2H), 8.36 (td, *J* = 8.0, 2.0 Hz, 1H), 7.68 (dd, *J* = 5.2, 2.0 Hz, 1H), 7.51–7.41 (m, 1H), 7.34–7.30 (m, 3H), 7.18 (ddd, *J* = 11.6, 8.4, 1.2 Hz, 1H), 2.42 (s, 3H). **<sup>13</sup>C NMR (101 MHz, CDCl<sub>3</sub>)** δ 164.8, 162.9,

160.4, 160.1 (d,  $J = 2.5$  Hz), 157.8, 141.1, 135.2, 132.3, 132.3, 131.1 (d,  $J = 2.5$  Hz), 129.4, 128.3, 125.3 (d,  $J = 10.3$  Hz), 124.8 (d,  $J = 3.5$  Hz), 118.6 (d,  $J = 22.0$  Hz), 116.5 (d,  $J = 22.8$  Hz), 21.6 (d,  $J = 4.2$  Hz).  **$^{19}\text{F}$  NMR (376 MHz,  $\text{CDCl}_3$ )**  $\delta$  -114.73. **IR (thin film,  $\text{cm}^{-1}$ ):** 3031, 2922, 1613, 1583, 1560, 1490, 1429, 1405, 1381, 1300, 1249, 1212, 1176, 831, 792, and 759  $\text{cm}^{-1}$ . **m.p.:** 49.4–52.4 °C. **HRMS (DART-TOF)** calculated for  $\text{C}_{17}\text{H}_{14}\text{FN}_2^+$   $[\text{M}+\text{H}]^+$   $m/z$  265.1136, found 265.1137.

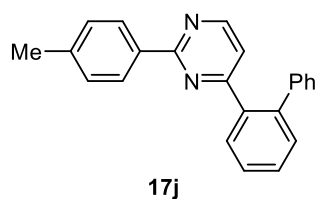

**4-([1,1'-biphenyl]-2-yl)-2-(*p*-tolyl) pyrimidine (17j)**

Following the **General Procedure**, pyrimidinyl sulfone **13a** (62.1 mg, 0.2 mmol), [1,1'-biphenyl]-2-ylboronic acid **16j** (79.2 mg, 0.4 mmol),  $\text{Ni}(\text{COD})_2$  (5.5 mg, 0.02 mmol),  $\text{PCy}_3 \cdot \text{HBF}_4$  (14.7 mg, 0.04 mmol),  $\text{KOH}$  (22.4 mg, 0.4 mmol), and THF (2.0 mL) were used. The residue was purification by flash chromatography ( $\text{SiO}_2$ , petroleum ether: EtOAc = 1:0 to 8:1) afforded the title product as a white solid (57.4 mg, 89%).

**$^1\text{H}$  NMR (400 MHz,  $\text{CDCl}_3$ )**  $\delta$  8.46 (d,  $J = 5.2$  Hz, 1H), 8.24 (d,  $J = 8.0$  Hz, 2H), 7.95–7.75 (m, 1H), 7.56–7.47 (m, 2H), 7.49–7.40 (m, 1H), 7.31–7.14 (m, 7H), 6.76 (d,  $J = 5.2$  Hz, 1H), 2.40 (s, 3H).  **$^{13}\text{C}$  NMR (101 MHz,  $\text{CDCl}_3$ )**  $\delta$  166.5, 164.7, 156.3, 141.5, 141.1, 140.9, 137.4, 135.2, 131.0, 130.7, 129.8, 129.7, 129.3, 128.4, 128.3, 127.9, 127.2, 119.5, 21.6 (d,  $J = 3.6$  Hz). **IR (thin film,  $\text{cm}^{-1}$ ):** 3030, 2932, 2855, 1580, 1558, 1540, 1478, 1427, 1404, 1378, 1176, 832, 795, 764, 746, and 701  $\text{cm}^{-1}$ . **m.p.:** 78.3–81.3 °C. **HRMS (DART-TOF)** calculated for  $\text{C}_{23}\text{H}_{19}\text{N}_2^+$   $[\text{M}+\text{H}]^+$   $m/z$  323.1543, found 323.1544.

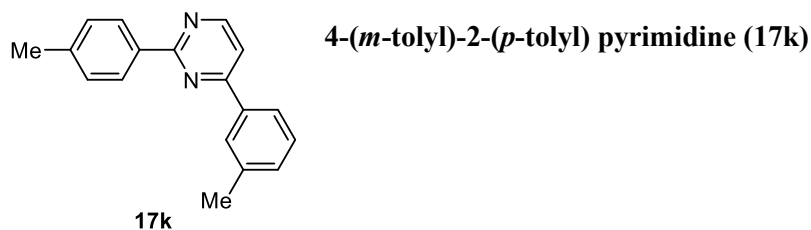

Following the **General Procedure**, pyrimidinyl sulfone **13a** (62.1 mg, 0.2 mmol), *m*-tolylboronic acid **16k** (54.4 mg, 0.4 mmol), Ni(COD)<sub>2</sub> (5.5 mg, 0.02 mmol), PCy<sub>3</sub>·HBF<sub>4</sub> (14.7 mg, 0.04 mmol), KOH (22.4 mg, 0.4 mmol), and THF (2.0 mL) were used. The residue was purification by flash chromatography (SiO<sub>2</sub>, petroleum ether: EtOAc = 1:0 to 10:1) afforded the title product as a white solid (42.8 mg, 82%).

**<sup>1</sup>H NMR (400 MHz, CDCl<sub>3</sub>)** δ 8.79 (d, *J* = 5.2 Hz, 1H), 8.47 (d, *J* = 8.0 Hz, 2H), 8.03 (s, 1H), 7.99 (d, *J* = 8.0 Hz, 1H), 7.54 (d, *J* = 5.2 Hz, 1H), 7.41 (t, *J* = 7.6 Hz, 1H), 7.32 (d, *J* = 8.0 Hz, 3H), 2.48 (s, 3H), 2.44 (s, 3H). **<sup>13</sup>C NMR (101 MHz, CDCl<sub>3</sub>)** δ 164.8, 164.1, 157.8, 141.0, 138.7, 137.2, 135.4, 131.8, 129.4, 128.9, 128.4, 128.0, 124.5, 114.5, 21.7, 21.6. **IR (thin film, cm<sup>-1</sup>):** 2920, 2855, 1583, 1561, 1548, 1490, 1430, 1406, 1382, 1176, 949, 874, 830, 763, and 750 cm<sup>-1</sup>. **m.p.:** 67.4–70.4 °C. **HRMS (DART-TOF)** calculated for C<sub>18</sub>H<sub>17</sub>N<sub>2</sub><sup>+</sup> [M+H]<sup>+</sup> *m/z* 261.1386, found 261.1388.

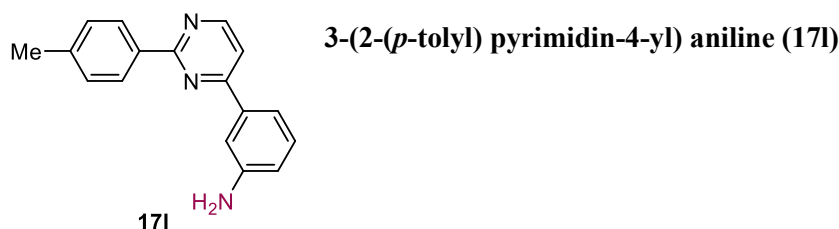

Following the **General Procedure**, pyrimidinyl sulfone **13a** (62.1 mg, 0.2 mmol), 3-Aminophenylboronic acid monohydrate **16l** (62.0 mg, 0.4 mmol), Ni(COD)<sub>2</sub> (5.5 mg, 0.02 mmol), PCy<sub>3</sub>·HBF<sub>4</sub> (14.7 mg, 0.04 mmol), KOH (22.4 mg, 0.4 mmol), and THF (2.0 mL) were used. The residue was purification by flash chromatography (SiO<sub>2</sub>, petroleum ether: EtOAc = 1:0 to 4:1) afforded the title product as a white solid (42.0 mg, 80%).

**<sup>1</sup>H NMR (400 MHz, CDCl<sub>3</sub>)** δ 8.75 (d, *J* = 5.2 Hz, 1H), 8.46 (d, *J* = 8.0 Hz, 2H), 7.58 (s, 1H), 7.50 (d, *J* = 7.6 Hz, 1H), 7.47 (d, *J* = 5.2 Hz, 1H), 7.34–7.24 (m, 3H), 6.79 (s, 1H), 3.91 (s, 2H), 2.42 (s, 3H). **<sup>13</sup>C NMR (101 MHz, CDCl<sub>3</sub>)** δ 164.6, 164.0, 157.7, 147.1, 141.0, 138.2, 135.3,



129.9, 129.4, 128.3, 117.7, 117.5, 114.5, 113.6, 21.6 (d,  $J = 3.7$  Hz). **IR (thin film,  $\text{cm}^{-1}$ ):** 3342, 2908, 1609, 1583, 1561, 1546, 1495, 1429, 1405, 1384, 1330, 1307, 1276, 1176, 949, 874, 830, 780, 765, and  $750 \text{ cm}^{-1}$ . **m.p.:** 129.4–132.4 °C. **HRMS (DART-TOF)** calculated for  $\text{C}_{17}\text{H}_{16}\text{N}_3^+$   $[\text{M}+\text{H}]^+$   $m/z$  262.1339, found 262.1342.

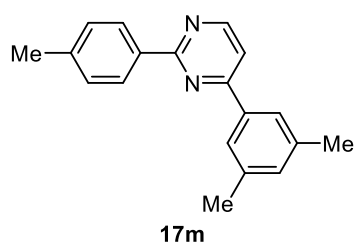

**4-(3,5-dimethylphenyl)-2-(*p*-tolyl) pyrimidine (17m)**

Following the **General Procedure**, pyrimidinyl sulfone **13a** (62.1 mg, 0.2 mmol), (3,5-dimethylphenyl)boronic acid **16m** (60.0 mg, 0.4 mmol),  $\text{Ni}(\text{COD})_2$  (5.5 mg, 0.02 mmol),  $\text{PCy}_3 \cdot \text{HBF}_4$  (14.7 mg, 0.04 mmol),  $\text{KOH}$  (22.4 mg, 0.4 mmol), and THF (2.0 mL) were used. The residue was purification by flash chromatography ( $\text{SiO}_2$ , petroleum ether: EtOAc = 1:0 to 10:1) afforded the title product as a white solid (49.9 mg, 91%).

**$^1\text{H}$  NMR (400 MHz,  $\text{CDCl}_3$ )**  $\delta$  8.75 (d,  $J = 5.2$  Hz, 1H), 8.46 (d,  $J = 8.0$  Hz, 2H), 7.79 (s, 2H), 7.50 (d,  $J = 5.2$  Hz, 1H), 7.31 (d,  $J = 8.0$  Hz, 2H), 7.13 (s, 1H), 2.42 (s, 3H), 2.41 (s, 6H).  **$^{13}\text{C}$  NMR (101 MHz,  $\text{CDCl}_3$ )**  $\delta$  164.7, 164.2, 157.7, 140.9, 138.6, 137.1, 135.4, 132.7, 129.4, 128.3, 125.1, 114.5, 21.6 (d,  $J = 4.0$  Hz), 21.5 (d,  $J = 3.9$  Hz). **IR (thin film,  $\text{cm}^{-1}$ ):** 3032, 3011, 2919, 2855, 1582, 1561, 1546, 1423, 1405, 1376, 1329, 1306, 1276, 1175, 825, 789, 748, and  $665 \text{ cm}^{-1}$ . **m.p.:** 79.1–82.1 °C. **HRMS (DART-TOF)** calculated for  $\text{C}_{19}\text{H}_{19}\text{N}_2^+$   $[\text{M}+\text{H}]^+$   $m/z$  275.1543, found 275.1541.

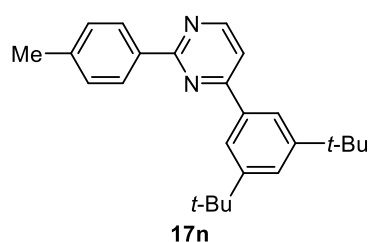

**4-(3,5-di-*tert*-butylphenyl)-2-(*p*-tolyl) pyrimidine (17n)**

Following the **General Procedure**, pyrimidinyl sulfone **13a** (62.1 mg, 0.2 mmol), (3,5-di-*tert*-

butylphenyl)boronic acid **16n** (93.7 mg, 0.4 mmol), Ni(COD)<sub>2</sub> (5.5 mg, 0.02 mmol), PCy<sub>3</sub>·HBF<sub>4</sub> (14.7 mg, 0.04 mmol), KOH (22.4 mg, 0.4 mmol), and THF (2.0 mL) were used. The residue was purification by flash chromatography (SiO<sub>2</sub>, petroleum ether: EtOAc = 1:0 to 10:1) afforded the title product as a white solid (66.3 mg, 92%).

**<sup>1</sup>H NMR (400 MHz, CDCl<sub>3</sub>)** δ 8.79 (d, *J* = 5.2 Hz, 1H), 8.48 (d, *J* = 8.0 Hz, 2H), 8.03 (s, 1H), 8.03 (s, 1H), 7.61 (s, 1H), 7.56 (d, *J* = 5.2 Hz, 1H), 7.33 (d, *J* = 8.0 Hz, 2H), 2.43 (s, 3H), 1.42 (s, 18H). **<sup>13</sup>C NMR (101 MHz, CDCl<sub>3</sub>)** δ 165.1, 164.6, 157.7, 151.6, 140.9, 136.7, 135.4, 129.4, 128.3, 125.2, 121.7, 114.8, 35.2, 31.6, 21.6 (d, *J* = 4.4 Hz). **IR (thin film, cm<sup>-1</sup>):** 2962, 2865, 1582, 1560, 1547, 1417, 1377, 1362, 1249, 1176, 881, 826, 791, 764, 750, and 665 cm<sup>-1</sup>. **m.p.:** 125.4–128.4 °C. **HRMS (DART-TOF)** calculated for C<sub>25</sub>H<sub>31</sub>N<sub>2</sub><sup>+</sup> [M+H]<sup>+</sup> *m/z* 359.2482, found 359.2487.

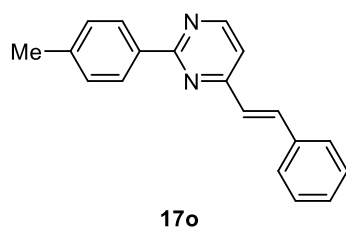

**(E)-4-styryl-2-(p-tolyl) pyrimidine (17o)**

Following the **General Procedure**, pyrimidinyl sulfone **13a** (62.1 mg, 0.2 mmol), trans-beta-styrylboronic acid **16o** (59.2 mg, 0.4 mmol), Ni(COD)<sub>2</sub> (5.5 mg, 0.02 mmol), PCy<sub>3</sub>·HBF<sub>4</sub> (14.7 mg, 0.04 mmol), KOH (22.4 mg, 0.4 mmol), and THF (2.0 mL) were used. The residue was purification by flash chromatography (SiO<sub>2</sub>, petroleum ether: EtOAc = 1:0 to 20:1) afforded the title product as a white solid (42.5 mg, 78%).

**<sup>1</sup>H NMR (400 MHz, CDCl<sub>3</sub>)** δ 8.71 (d, *J* = 5.2 Hz, 1H), 8.42 (d, *J* = 8.0 Hz, 2H), 7.99 (d, *J* = 16.0 Hz, 1H), 7.63 (d, *J* = 7.6 Hz, 2H), 7.41 (t, *J* = 7.2 Hz, 2H), 7.36 (d, *J* = 7.2 Hz, 1H), 7.31 (d, *J* = 8.0 Hz, 2H), 7.16–7.03 (m, 2H), 2.43 (s, 3H). **<sup>13</sup>C NMR (101 MHz, CDCl<sub>3</sub>)** δ 164.6, 162.4, 157.8, 141.0, 137.0, 136.0, 135.3, 129.4, 129.4, 129.0, 128.3, 127.8, 126.4, 116.2, 21.6. **IR (thin film, cm<sup>-1</sup>):** 3017, 2917, 1637, 1581, 1558, 1541, 1494, 1449, 1432, 1404, 1388, 1276, 1175, 968, 873, 819, 788, 764, 751, and 690 cm<sup>-1</sup>. **m.p.:** 112.5–115.5 °C. **HRMS (DART-TOF)** calculated for C<sub>19</sub>H<sub>17</sub>N<sub>2</sub><sup>+</sup> [M+H]<sup>+</sup> *m/z* 273.1386, found 273.1386.

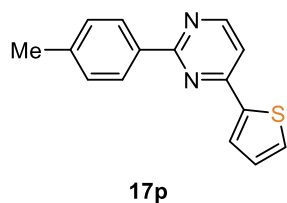

**4-(thiophen-2-yl)-2-(*p*-tolyl) pyrimidine (17p)**

Following the **General Procedure**, pyrimidinyl sulfone **13a** (62.1 mg, 0.2 mmol), thiophen-2-ylboronic acid **16p** (51.2 mg, 0.4 mmol), Ni(COD)<sub>2</sub> (5.5 mg, 0.02 mmol), PCy<sub>3</sub>·HBF<sub>4</sub> (14.7 mg, 0.04 mmol), KOH (22.4 mg, 0.4 mmol), and THF (2.0 mL) were used. The residue was purification by flash chromatography (SiO<sub>2</sub>, petroleum ether: EtOAc = 1:0 to 20:1) afforded the title product as a light yellow solid (48.0 mg, 95%).

**<sup>1</sup>H NMR (400 MHz, CDCl<sub>3</sub>)** δ 8.69 (d, *J* = 5.2 Hz, 1H), 8.41 (d, *J* = 8.0 Hz, 2H), 7.77 (d, *J* = 2.4 Hz, 1H), 7.51 (d, *J* = 2.4 Hz, 1H), 7.36 (d, *J* = 5.2 Hz, 1H), 7.30 (d, *J* = 8.0 Hz, 2H), 7.14 (t, *J* = 4.4 Hz, 1H), 2.42 (s, 3H). **<sup>13</sup>C NMR (101 MHz, CDCl<sub>3</sub>)** δ 164.7, 159.0, 157.6, 143.1, 141.1, 134.9, 130.1, 129.4, 128.4, 128.3, 127.4, 112.6, 21.6 (d, *J* = 4.4 Hz). **IR (thin film, cm<sup>-1</sup>):** 3041, 2922, 2860, 1610, 1582, 1559, 1546, 1438, 1419, 1406, 1385, 1342, 1275, 1176, 822, 785, 749, and 710 cm<sup>-1</sup>. **m.p.:** 62.1–65.1 °C. **HRMS (DART-TOF)** calculated for C<sub>15</sub>H<sub>13</sub>N<sub>2</sub>S<sup>+</sup> [M+H]<sup>+</sup> *m/z* 253.0794, found 253.0792.

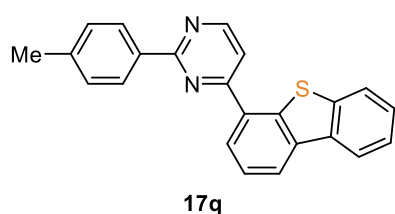

**4-(dibenzo [b, d] thiophen-4-yl)-2-(*p*-tolyl) pyrimidine (17q)**

Following the **General Procedure**, pyrimidinyl sulfone **13a** (62.1 mg, 0.2 mmol), 4-dibenzothiophene boronic acid **16q** (91.2 mg, 0.4 mmol), Ni(COD)<sub>2</sub> (5.5 mg, 0.02 mmol), PCy<sub>3</sub>·HBF<sub>4</sub> (14.7 mg, 0.04 mmol), KOH (22.4 mg, 0.4 mmol), and THF (2.0 mL) were used. The residue was purification by flash chromatography (SiO<sub>2</sub>, petroleum ether: EtOAc = 1:0 to 4:1) afforded the title product as a light yellow solid (66.3 mg, 94%).

**<sup>1</sup>H NMR (400 MHz, CDCl<sub>3</sub>)** δ 8.76 (d, *J* = 5.2 Hz, 1H), 8.64 (d, *J* = 8.0 Hz, 2H), 8.22 (d, *J* = 7.2 Hz, 1H), 8.13 (d, *J* = 7.2 Hz, 1H), 7.97 (d, *J* = 7.6 Hz, 1H), 7.93 (d, *J* = 5.2 Hz, 1H), 7.60 (d, *J* = 5.2 Hz, 1H), 7.50–7.40 (m, 3H), 7.38 (d, *J* = 8.0 Hz, 2H), 2.46 (s, 3H). **<sup>13</sup>C NMR (101**

**MHz, CDCl<sub>3</sub>)**  $\delta$  164.8, 163.1, 157.5, 142.0, 141.2, 138.0, 137.6, 135.2, 134.4, 131.0, 129.5, 129.0, 127.1, 125.9, 124.5, 124.4, 123.9, 122.6, 121.4, 114.6, 21.7 (d,  $J = 4.3$  Hz). **IR (thin film, cm<sup>-1</sup>):** 2932, 2851, 1582, 1560, 1539, 1430, 1406, 1371, 1276, 1177, 828, 800, 785, and 750 cm<sup>-1</sup>. **m.p.:** 147.6–150.6 °C. **HRMS (DART-TOF)** calculated for C<sub>23</sub>H<sub>17</sub>N<sub>2</sub>S<sup>+</sup> [M+H]<sup>+</sup> m/z 353.1107, found 353.1110.

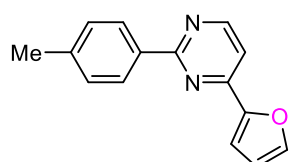

**4-(furan-2-yl)-2-(*p*-tolyl) pyrimidine (17r)**

**17r**

Following the **General Procedure**, pyrimidinyl sulfone **13a** (62.1 mg, 0.2 mmol), furan-2-ylboronic acid **16r** (44.7 mg, 0.4 mmol), Ni(COD)<sub>2</sub> (5.5 mg, 0.02 mmol), PCy<sub>3</sub>·HBF<sub>4</sub> (14.7 mg, 0.04 mmol), KOH (22.4 mg, 0.4 mmol), and THF (2.0 mL) were used. The residue was purification by flash chromatography (SiO<sub>2</sub>, petroleum ether: EtOAc = 1:0 to 20:1) afforded the title product as a white solid (37.7 mg, 80%).

**<sup>1</sup>H NMR (400 MHz, CDCl<sub>3</sub>)**  $\delta$  8.75 (d,  $J = 5.2$  Hz, 1H), 8.40 (d,  $J = 8.0$  Hz, 2H), 7.59 (s, 1H), 7.43 (d,  $J = 5.2$  Hz, 1H), 7.39 (d,  $J = 3.6$  Hz, 1H), 7.29 (d,  $J = 8.0$  Hz, 2H), 6.58 (dd,  $J = 3.6, 2.0$  Hz, 1H), 2.42 (s, 3H). **<sup>13</sup>C NMR (101 MHz, CDCl<sub>3</sub>)**  $\delta$  164.6, 157.8, 155.6, 152.3, 145.0, 141.0, 135.0, 129.4, 128.3, 112.6, 112.3, 112.2, 21.6 (d,  $J = 3.1$  Hz). **IR (thin film, cm<sup>-1</sup>):** 3031, 2927, 2855, 1600, 1557, 1479, 1428, 1393, 1368, 1223, 1176, 1006, 917, 884, 821, 787, 746, and 682 cm<sup>-1</sup>. **m.p.:** 64.4–67.4 °C. **HRMS (DART-TOF)** calculated for C<sub>15</sub>H<sub>13</sub>N<sub>2</sub>O<sup>+</sup> [M+H]<sup>+</sup> m/z 237.1022, found 237.1023.

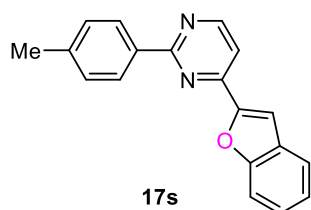

**4-(benzofuran-3-yl)-2-(*p*-tolyl) pyrimidine (17s)**

**17s**

Following the **General Procedure**, pyrimidinyl sulfone **13a** (62.1 mg, 0.2 mmol), benzofuran-2-ylboronic acid **16s** (64.8 mg, 0.4 mmol), Ni(COD)<sub>2</sub> (5.5 mg, 0.02 mmol), PCy<sub>3</sub>·HBF<sub>4</sub> (14.7

mg, 0.04 mmol), KOH (22.4 mg, 0.4 mmol), and THF (2.0 mL) were used. The residue was purification by flash chromatography (SiO<sub>2</sub>, petroleum ether: EtOAc = 1:0 to 20:1) afforded the title product as a white solid (55.2 mg, 96%).

**<sup>1</sup>H NMR (400 MHz, CDCl<sub>3</sub>)** δ 8.82 (d, *J* = 5.2 Hz, 1H), 8.43 (d, *J* = 8.0 Hz, 2H), 7.77 (s, 1H), 7.68 (d, *J* = 8.0 Hz, 1H), 7.61 (d, *J* = 5.2 Hz, 1H), 7.56 (d, *J* = 8.0 Hz, 1H), 7.38 (t, *J* = 7.2 Hz, 1H), 7.33–7.25 (m, 3H), 2.43 (s, 3H). **<sup>13</sup>C NMR (101 MHz, CDCl<sub>3</sub>)** δ 164.8, 158.2, 155.9, 155.8, 153.7, 141.2, 134.9, 129.4, 128.5, 128.4, 126.4, 123.6, 122.4, 113.3, 111.8, 108.3, 21.6 (d, *J* = 3.4 Hz). **IR (thin film, cm<sup>-1</sup>):** 2916, 2865, 1604, 1560, 1530, 1450, 1391, 1178, 832, 815, 787, and 748 cm<sup>-1</sup>. **m.p.:** 168.2–171.2 °C. **HRMS (DART-TOF)** calculated for C<sub>19</sub>H<sub>15</sub>N<sub>2</sub>O<sup>+</sup> [M+H]<sup>+</sup> *m/z* 287.1179, found 287.1182.

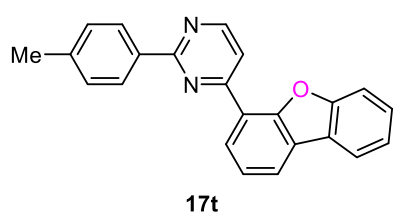

**4-(dibenzo [b, d] furan-4-yl)-2-(*p*-tolyl) pyrimidine (17t)**

Following the **General Procedure**, pyrimidinyl sulfone **13a** (62.1 mg, 0.2 mmol), dibenzofuran-4-ylboronic acid **16t** (84.8 mg, 0.4 mmol), Ni(COD)<sub>2</sub> (5.5 mg, 0.02 mmol), PCy<sub>3</sub>·HBF<sub>4</sub> (14.7 mg, 0.04 mmol), KOH (22.4 mg, 0.4 mmol), and THF (2.0 mL) were used. The residue was purification by flash chromatography (SiO<sub>2</sub>, petroleum ether: EtOAc = 1:0 to 20:1) afforded the title product as a white solid (63.5 mg, 94%).

**<sup>1</sup>H NMR (400 MHz, CDCl<sub>3</sub>)** δ 8.88 (d, *J* = 5.2 Hz, 1H), 8.64 (d, *J* = 8.8 Hz, 1H), 8.48 (d, *J* = 8.8 Hz, 2H), 8.29 (d, *J* = 5.2 Hz, 1H), 8.00 (d, *J* = 8.8 Hz, 1H), 7.93 (d, *J* = 8.8 Hz, 1H), 7.61 (d, *J* = 8.4 Hz, 1H), 7.47 (t, *J* = 7.6 Hz, 2H), 7.36 (d, *J* = 7.6 Hz, 1H), 7.32 (d, *J* = 8.4 Hz, 2H), 2.43 (s, 3H). **<sup>13</sup>C NMR (101 MHz, CDCl<sub>3</sub>)** δ 164.5, 160.1, 158.0, 156.1, 154.6, 141.0, 135.4, 129.4, 128.3, 127.6, 127.3, 125.5, 123.7, 123.3, 123.2, 121.9, 120.8, 118.2, 111.9, 21.6 (d, *J* = 3.3 Hz). **IR (thin film, cm<sup>-1</sup>):** 2903, 2851, 1583, 1559, 1474, 1441, 1377, 1300, 1175, 830, 802, and 754 cm<sup>-1</sup>. **m.p.:** 176.4–179.4 °C. **HRMS (DART-TOF)** calculated for C<sub>23</sub>H<sub>17</sub>N<sub>2</sub>O<sup>+</sup> [M+H]<sup>+</sup> *m/z* 337.1335, found 337.1343.

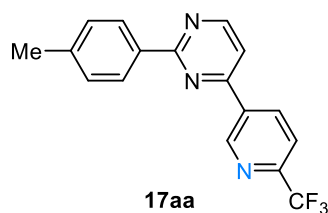

**2-(*p*-tolyl)-4-(6-(trifluoromethyl)pyridin-3-yl)pyrimidine  
(17aa)**

Following the **General Procedure**, pyrimidinyl sulfone **13a** (62.1 mg, 0.2 mmol), (6-(trifluoromethyl)pyridin-3-yl)boronic acid **16aa** (76.4 mg, 0.4 mmol), Ni(COD)<sub>2</sub> (5.5 mg, 0.02 mmol), PCy<sub>3</sub>·HBF<sub>4</sub> (14.7 mg, 0.04 mmol), KOH (22.4 mg, 0.4 mmol), and THF (2.0 mL) were used. The residue was purification by flash chromatography (SiO<sub>2</sub>, petroleum ether: EtOAc = 1:0 to 8:1) afforded the title product as a light yellow solid (46.3 mg, 73%).

**<sup>1</sup>H NMR (400 MHz, CDCl<sub>3</sub>)** δ 9.45 (s, 1H), 8.90 (d, *J* = 5.1 Hz, 1H), 8.69 (d, *J* = 8.1 Hz, 1H), 8.43 (d, *J* = 8.3 Hz, 2H), 7.84 (d, *J* = 8.2 Hz, 1H), 7.60 (d, *J* = 5.1 Hz, 1H), 7.32 (d, *J* = 8.0 Hz, 2H), 2.44 (s, 3H). **<sup>13</sup>C NMR (101 MHz, CDCl<sub>3</sub>)** δ 165.3, 160.1, 158.70, 149.7 (q, *J* = 34.4 Hz), 148.8, 141.8, 136.2, 135.5, 134.5, 129.6, 128.4, 120.7 (d, *J* = 2.9 Hz), 121.5 (d, *J* = 172.6 Hz), 114.7, 21.6 (d, *J* = 2.9 Hz). **<sup>19</sup>F NMR (376 MHz, CDCl<sub>3</sub>)** δ -67.96. **IR (thin film, cm<sup>-1</sup>):** 2993, 1585, 1559, 1492, 1399, 1341, 1276, 1178, 1134, 947, 874, 829, 790, 764, and 750 cm<sup>-1</sup>. **m.p.:** 175.2–178.2 °C. **HRMS (DART-TOF)** calculated for C<sub>17</sub>H<sub>13</sub>F<sub>3</sub>N<sub>3</sub><sup>+</sup> [M+H]<sup>+</sup> *m/z* 316.1056, found 316.1057.

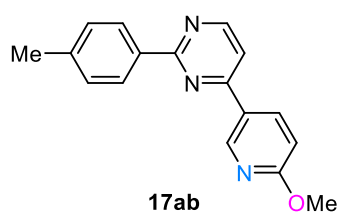

**4-(6-methoxypyridin-3-yl)-2-(*p*-tolyl)pyrimidine (17ab)**

Following the **General Procedure**, pyrimidinyl sulfone **13a** (62.1 mg, 0.2 mmol), (6-methoxypyridin-3-yl)boronic acid **16ab** (61.2 mg, 0.4 mmol), Ni(COD)<sub>2</sub> (5.5 mg, 0.02 mmol), PCy<sub>3</sub>·HBF<sub>4</sub> (14.7 mg, 0.04 mmol), KOH (22.4 mg, 0.4 mmol), and THF (2.0 mL) were used. The residue was purification by flash chromatography (SiO<sub>2</sub>, petroleum ether: EtOAc = 1:0 to 8:1) afforded the title product as a white solid (49.4 mg, 89%).

**<sup>1</sup>H NMR (400 MHz, CDCl<sub>3</sub>)** δ 8.98 (d, *J* = 2.4 Hz, 1H), 8.75 (d, *J* = 5.2 Hz, 1H), 8.50–8.24 (m, 3H), 7.45 (d, *J* = 5.2 Hz, 1H), 7.30 (d, *J* = 8.0 Hz, 2H), 6.86 (d, *J* = 8.8 Hz, 1H), 4.01 (s,

3H), 2.42 (s, 3H).  $^{13}\text{C}$  NMR (101 MHz,  $\text{CDCl}_3$ )  $\delta$  166.0, 164.7, 161.6, 157.8, 146.7, 141.2, 137.4, 135.1, 129.4, 128.3, 126.3, 113.3, 111.2, 53.9 (d,  $J = 4.1$  Hz), 21.6 (d,  $J = 3.1$  Hz). IR (thin film,  $\text{cm}^{-1}$ ): 3005, 2841, 1603, 1562, 1543, 1495, 1438, 1394, 1358, 1276, 1260, 1174, 950, 875, 821, 785, 764, and 750  $\text{cm}^{-1}$ . m.p.: 94.2–97.2 °C. HRMS (DART-TOF) calculated for  $\text{C}_{17}\text{H}_{16}\text{N}_3\text{O}^+$   $[\text{M}+\text{H}]^+$   $m/z$  278.1288, found 278.1290.

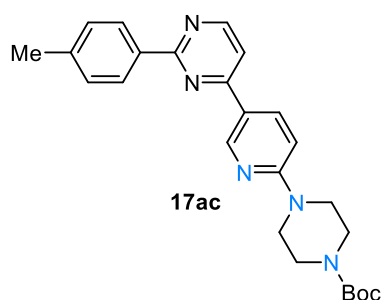

*tert*-butyl 4-(5-(2-(*p*-tolyl) pyrimidin-4-yl) pyridin-2-yl) piperazine-1-carboxylate (**17ac**)

Following the **General Procedure**, pyrimidinyl sulfone **13a** (62.1 mg, 0.2 mmol), *tert*-butyl 4-(5-(4,4,5,5-tetramethyl-1,3,2-dioxaborolan-2-yl)pyridin-2-yl)piperazine-1-carboxylate (**16ac**) (155.7 mg, 0.4 mmol),  $\text{Ni}(\text{COD})_2$  (5.5 mg, 0.02 mmol),  $\text{PCy}_3 \cdot \text{HBF}_4$  (14.7 mg, 0.04 mmol), KOH (22.4 mg, 0.4 mmol), and THF (2.0 mL) were used. The residue was purification by flash chromatography ( $\text{SiO}_2$ , petroleum ether: EtOAc = 1:0 to 4:1) afforded the title product as a white solid (79.4 mg, 92%).

$^1\text{H}$  NMR (400 MHz,  $\text{CDCl}_3$ )  $\delta$  9.00 (d,  $J = 2.4$  Hz, 1H), 8.69 (d,  $J = 5.2$  Hz, 1H), 8.43 (d,  $J = 8.0$  Hz, 2H), 8.31 (dd,  $J = 8.8, 2.4$  Hz, 1H), 7.39 (d,  $J = 5.2$  Hz, 1H), 7.30 (d,  $J = 8.0$  Hz, 2H), 6.68 (d,  $J = 8.8$  Hz, 1H), 3.70–3.62 (m, 4H), 3.60–3.52 (m, 4H), 2.42 (s, 3H), 1.50 (s, 9H).  $^{13}\text{C}$  NMR (101 MHz,  $\text{CDCl}_3$ )  $\delta$  164.5, 161.8, 160.0, 157.4, 154.8, 147.8, 140.9, 136.2, 135.3, 129.3, 128.2, 122.0, 112.5, 106.3, 80.1, 44.7, 43.3, 28.5, 21.5 (d,  $J = 3.2$  Hz). IR (thin film,  $\text{cm}^{-1}$ ): 2984, 1688, 1601, 1502, 1403, 1276, 1173, 949, 874, 818, 789, 764, and 750  $\text{cm}^{-1}$ . m.p.: 189.2–192.2 °C. HRMS (DART-TOF) calculated for  $\text{C}_{25}\text{H}_{30}\text{N}_5\text{O}_2^+$   $[\text{M}+\text{H}]^+$   $m/z$  432.2394, found 432.2400.

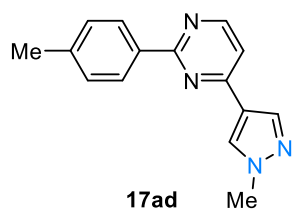

**4-(1-methyl-1H-pyrazol-4-yl)-2-(*p*-tolyl) pyrimidine (17ad)**

Following the **General Procedure**, pyrimidinyl sulfone **13a** (62.1 mg, 0.2 mmol), 1-methyl-4-pyrazole boronic acid pinacol ester **16ad** (83.2 mg, 0.4 mmol), Ni(COD)<sub>2</sub> (5.5 mg, 0.02 mmol), PCy<sub>3</sub>·HBF<sub>4</sub> (14.7 mg, 0.04 mmol), KOH (22.4 mg, 0.4 mmol), and THF (2.0 mL) were used. The residue was purification by flash chromatography (SiO<sub>2</sub>, petroleum ether: EtOAc = 1:0 to 4:1) afforded the title product as a white solid (30.5 mg, 61%).

**<sup>1</sup>H NMR (400 MHz, CDCl<sub>3</sub>)** δ 8.66 (d, *J* = 5.2 Hz, 1H), 8.38 (d, *J* = 8.0 Hz, 2H), 8.11 (s, 1H), 8.07 (s, 1H), 7.29 (d, *J* = 8.0 Hz, 2H), 7.20 (d, *J* = 5.2 Hz, 1H), 3.97 (s, 3H), 2.42 (s, 3H). **<sup>13</sup>C NMR (101 MHz, CDCl<sub>3</sub>)** δ 164.7, 158.8, 157.4, 140.9, 138.5, 135.2, 130.4, 129.3, 128.2, 122.1, 113.6, 39.4 (d, *J* = 4.1 Hz), 21.6 (d, *J* = 3.4 Hz). **IR (thin film, cm<sup>-1</sup>):** 2936, 1587, 1561, 1537, 1405, 1226, 1176, 978, 950, 872, 827, 789, 765, and 750 cm<sup>-1</sup>. **m.p.:** 117.2–120.2 °C. **HRMS (DART-TOF)** calculated for C<sub>15</sub>H<sub>15</sub>N<sub>4</sub><sup>+</sup> [M+H]<sup>+</sup> *m/z* 251.1291, found 251.1292.

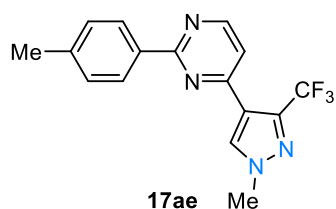

**4-(1-methyl-3-(trifluoromethyl)-1H-pyrazol-4-yl)-2-(*p*-tolyl) pyrimidine (17ae)**

Following the **General Procedure**, pyrimidinyl sulfone **13a** (62.1 mg, 0.2 mmol), 1-methyl-4-(4,4,5,5-tetramethyl-1,3,2-dioxaborolan-2-yl)-3-(trifluoromethyl)-1H-pyrazole **16ae** (110.4 mg, 0.4 mmol), Ni(COD)<sub>2</sub> (5.5 mg, 0.02 mmol), PCy<sub>3</sub>·HBF<sub>4</sub> (14.7 mg, 0.04 mmol), KOH (22.4 mg, 0.4 mmol), and THF (2.0 mL) were used. The residue was purification by flash chromatography (SiO<sub>2</sub>, petroleum ether: EtOAc = 1:0 to 4:1) afforded the title product as a white solid (51.2 mg, 80%).

**<sup>1</sup>H NMR (400 MHz, CDCl<sub>3</sub>)** δ 8.74 (d, *J* = 5.2 Hz, 1H), 8.38 (d, *J* = 8.0 Hz, 2H), 8.14 (s, 1H), 7.32 (d, *J* = 5.2 Hz, 1H), 7.29 (d, *J* = 8.0 Hz, 2H), 4.00 (s, 3H), 2.42 (s, 3H). **<sup>13</sup>C NMR (101 MHz, CDCl<sub>3</sub>)** δ 164.7, 158.0, 156.8, 141.2, 139.4 (q, *J* = 37.3 Hz), 134.9, 133.8, 129.4, 128.3,



125.4, 122.8, 120.4, 120.1, 115.4 (d,  $J = 2.9$  Hz), 39.90, 21.59.  **$^{19}\text{F}$  NMR (376 MHz,  $\text{CDCl}_3$ )**  $\delta$  -60.37. **IR (thin film,  $\text{cm}^{-1}$ ):** 2903, 1586, 1573, 1559, 1490, 1430, 1407, 1327, 1281, 1174, 1138, 1088, 825, 789, 764, and 749  $\text{cm}^{-1}$ . **m.p.:** 109.3–112.3 °C. **HRMS (DART-TOF)** calculated for  $\text{C}_{16}\text{H}_{14}\text{F}_3\text{N}_4^+$   $[\text{M}+\text{H}]^+$   $m/z$  319.1165, found 319.1164.

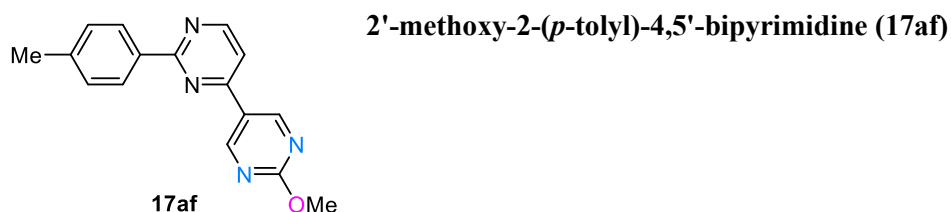

Following the **General Procedure**, pyrimidinyl sulfone **13a** (62.1 mg, 0.2 mmol), (2-methoxypyrimidin-5-yl)boronic acid **16af** (61.6 mg, 0.4 mmol),  $\text{Ni}(\text{COD})_2$  (5.5 mg, 0.02 mmol),  $\text{PCy}_3 \cdot \text{HBF}_4$  (14.7 mg, 0.04 mmol),  $\text{KOH}$  (22.4 mg, 0.4 mmol), and THF (2.0 mL) were used. The residue was purification by flash chromatography ( $\text{SiO}_2$ , petroleum ether: EtOAc = 1:0 to 4:1) afforded the title product as a white solid (41.2 mg, 74%).

**$^1\text{H}$  NMR (400 MHz,  $\text{CDCl}_3$ )**  $\delta$  9.30 (s, 2H), 8.82 (d,  $J = 5.2$  Hz, 1H), 8.42 (d,  $J = 8.0$  Hz, 2H), 7.48 (d,  $J = 5.2$  Hz, 1H), 7.31 (d,  $J = 8.0$  Hz, 2H), 4.12 (s, 3H), 2.44 (s, 3H).  **$^{13}\text{C}$  NMR (101 MHz,  $\text{CDCl}_3$ )**  $\delta$  166.9, 165.1, 159.3, 158.5, 158.3, 141.6, 134.7, 129.5, 128.4, 124.6, 113.2, 55.6 (d,  $J = 4.1$  Hz), 21.6 (d,  $J = 3.3$  Hz). **IR (thin film,  $\text{cm}^{-1}$ ):** 2960, 2922, 1597, 1582, 1566, 1487, 1445, 1409, 1363, 1325, 1306, 1275, 1169, 1036, 949, 830, 789, 764, and 750  $\text{cm}^{-1}$ . **m.p.:** 158.1–161.1 °C. **HRMS (DART-TOF)** calculated for  $\text{C}_{16}\text{H}_{15}\text{N}_4\text{O}^+$   $[\text{M}+\text{H}]^+$   $m/z$  279.1240, found 279.1243.

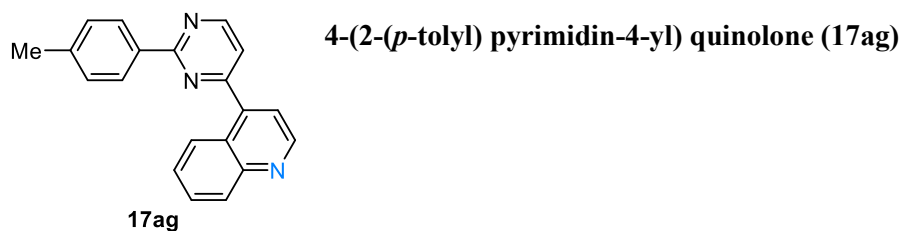

Following the **General Procedure**, pyrimidinyl sulfone **13a** (62.1 mg, 0.2 mmol), quinolin-4-ylboronic acid **16ag** (69.2 mg, 0.4 mmol),  $\text{Ni}(\text{COD})_2$  (5.5 mg, 0.02 mmol),  $\text{PCy}_3 \cdot \text{HBF}_4$  (14.7 mg, 0.04 mmol),  $\text{KOH}$  (22.4 mg, 0.4 mmol), and THF (2.0 mL) were used. The residue was

purification by flash chromatography (SiO<sub>2</sub>, petroleum ether: EtOAc = 1:0 to 8:1) afforded the title product as a white solid (26.4 mg, 44%).

**<sup>1</sup>H NMR (400 MHz, CDCl<sub>3</sub>)** δ 9.06 (d, *J* = 4.4 Hz, 1H), 8.96 (d, *J* = 5.2 Hz, 1H), 8.44 (d, *J* = 8.0 Hz, 2H), 8.28 (d, *J* = 8.4 Hz, 1H), 8.23 (d, *J* = 8.4 Hz, 1H), 7.82–7.76 (m, 1H), 7.64–7.55 (m, 2H), 7.47 (d, *J* = 5.2 Hz, 1H), 7.31 (d, *J* = 8.0 Hz, 2H), 2.43 (s, 3H). **<sup>13</sup>C NMR (101 MHz, CDCl<sub>3</sub>)** δ 165.0, 164.3, 158.1, 150.1, 149.1, 144.2, 141.6, 134.7, 130.2, 129.8, 129.6, 128.5, 127.6, 125.5, 125.4, 121.5, 119.2, 21.7. **IR (thin film, cm<sup>-1</sup>):** 3008, 1580, 1557, 1542, 1507, 1462, 1437, 1395, 1382, 1276, 1177, 949, 874, 831, 794, 764, and 750 cm<sup>-1</sup>. **m.p.:** 126.7–129.7 °C. **HRMS (DART-TOF)** calculated for C<sub>20</sub>H<sub>16</sub>N<sub>3</sub><sup>+</sup> [M+H]<sup>+</sup> *m/z* 298.1339, found 298.1343.

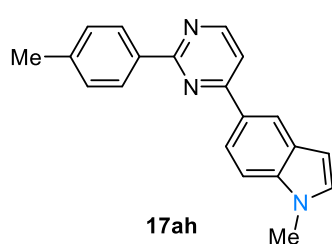

**1-methyl-5-(2-(*p*-tolyl)pyrimidin-4-yl)-1H-indole (17ah)**

Following the **General Procedure**, pyrimidinyl sulfone **13a** (62.1 mg, 0.2 mmol), (1-methylindol-5-yl)boronic acid **16ah** (70.0 mg, 0.4 mmol), Ni(COD)<sub>2</sub> (5.5 mg, 0.02 mmol), PCy<sub>3</sub>·HBF<sub>4</sub> (14.7 mg, 0.04 mmol), KOH (22.4 mg, 0.4 mmol), and THF (2.0 mL) were used. The residue was purification by flash chromatography (SiO<sub>2</sub>, petroleum ether: EtOAc = 1:0 to 8:1) afforded the title product as a white solid (45.7 mg, 76%).

**<sup>1</sup>H NMR (400 MHz, CDCl<sub>3</sub>)** δ 8.71 (d, *J* = 5.2 Hz, 1H), 8.52 (d, *J* = 2.0 Hz, 1H), 8.50 (d, *J* = 8.0 Hz, 2H), 8.11 (dd, *J* = 8.4, 2.0 Hz, 1H), 7.56 (d, *J* = 5.2 Hz, 1H), 7.37 (d, *J* = 8.8 Hz, 1H), 7.32 (d, *J* = 8.0 Hz, 2H), 7.06 (d, *J* = 3.2 Hz, 1H), 6.60 (d, *J* = 3.2 Hz, 1H), 3.76 (s, 3H), 2.43 (s, 3H). **<sup>13</sup>C NMR (101 MHz, CDCl<sub>3</sub>)** δ 165.0, 164.5, 157.3, 140.7, 138.5, 135.7, 130.1, 129.3, 128.9, 128.4, 128.3, 120.9, 120.7, 114.0, 109.6, 102.4, 33.1 (d, *J* = 4.1 Hz), 21.6 (d, *J* = 3.5 Hz). **IR (thin film, cm<sup>-1</sup>):** 2920, 1583, 1558, 1512, 1433, 1421, 1405, 1337, 1275, 1175, 875, 831, 806, 786, 764, and 750 cm<sup>-1</sup>. **m.p.:** 174.4–177.4 °C. **HRMS (DART-TOF)** calculated for C<sub>20</sub>H<sub>18</sub>N<sub>3</sub><sup>+</sup> [M+H]<sup>+</sup> *m/z* 300.1495, found 300.1495.

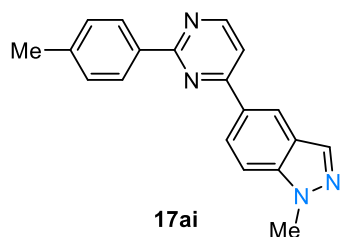

**1-methyl-5-(2-(*p*-tolyl) pyrimidin-4-yl)-1H-indazole (17ai)**

Following the **General Procedure**, pyrimidinyl sulfone **13a** (62.1 mg, 0.2 mmol), 1-Methyl-1H-indazol-5-boronic acid **16ai** (70.4 mg, 0.4 mmol), Ni(COD)<sub>2</sub> (5.5 mg, 0.02 mmol), PCy<sub>3</sub>·HBF<sub>4</sub> (14.7 mg, 0.04 mmol), KOH (22.4 mg, 0.4 mmol), and THF (2.0 mL) were used. The residue was purification by flash chromatography (SiO<sub>2</sub>, petroleum ether: EtOAc = 1:0 to 4:1) afforded the title product as a white solid (32.0 mg, 53%).

**<sup>1</sup>H NMR (400 MHz, CDCl<sub>3</sub>)** δ 8.77 (d, *J* = 5.2 Hz, 1H), 8.61 (s, 1H), 8.48 (d, *J* = 8.0 Hz, 2H), 8.27 (dd, *J* = 8.8, 2.0 Hz, 1H), 8.11 (s, 1H), 7.57 (d, *J* = 5.2 Hz, 1H), 7.48 (d, *J* = 8.8 Hz, 1H), 7.33 (d, *J* = 8.0 Hz, 2H), 4.10 (s, 3H), 2.44 (s, 3H). **<sup>13</sup>C NMR (101 MHz, CDCl<sub>3</sub>)** δ 164.7, 164.0, 157.7, 141.1, 141.0, 135.4, 134.2, 129.9, 129.4, 128.3, 125.5, 124.6, 121.0, 114.0, 109.4, 35.8 (d, *J* = 3.9 Hz), 21.6 (d, *J* = 2.9 Hz). **IR (thin film, cm<sup>-1</sup>):** 3031, 2921, 1582, 1560, 1503, 1430, 1406, 1348, 1276, 1175, 1108, 949, 874, 831, 806, 786, 764, and 750 cm<sup>-1</sup>. **m.p.:** 151.9–154.9 °C. **HRMS (DART-TOF)** calculated for C<sub>19</sub>H<sub>17</sub>N<sub>4</sub><sup>+</sup> [M+H]<sup>+</sup> *m/z* 301.1448, found 301.1444.

## 8. Characterization Data for Compounds in Scheme 3 and 4

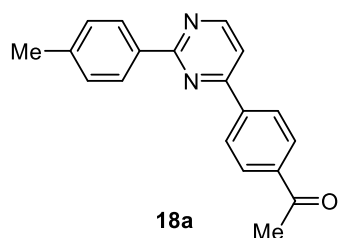

**1-(4-(2-(*p*-tolyl) pyrimidin-4-yl) phenyl) ethan-1-one (18a)**

Following the **General Procedure**, pyrimidinyl sulfone **13a** (62.1 mg, 0.2 mmol), (4-acetylphenyl)boronic acid **14** (65.6 mg, 0.4 mmol), Ni(COD)<sub>2</sub> (5.5 mg, 0.02 mmol), PCy<sub>3</sub>·HBF<sub>4</sub> (14.7 mg, 0.04 mmol), KOH (22.4 mg, 0.4 mmol), and THF (2.0 mL) were used. The residue

was purification by flash chromatography (SiO<sub>2</sub>, petroleum ether: EtOAc = 1:0 to 5:1) afforded the title product as a white solid (52.6 mg, 91%).

**<sup>1</sup>H NMR (400 MHz, CDCl<sub>3</sub>)** δ 8.83 (d, *J* = 5.2 Hz, 1H), 8.45 (d, *J* = 8.0 Hz, 2H), 8.27 (d, *J* = 8.4 Hz, 2H), 8.08 (d, *J* = 8.4 Hz, 2H), 7.56 (d, *J* = 5.2 Hz, 1H), 7.32 (d, *J* = 8.0 Hz, 2H), 2.65 (s, 3H), 2.43 (s, 3H). **<sup>13</sup>C NMR (101 MHz, CDCl<sub>3</sub>)** δ 197.7, 164.9, 162.6, 158.2, 141.3 (d, *J* = 5.1 Hz), 138.7, 135.0, 129.5, 128.9, 128.4, 127.5 (d, *J* = 3.1 Hz), 114.7, 26.9 (d, *J* = 3.9 Hz), 21.6 (d, *J* = 4.0 Hz). **IR (thin film, cm<sup>-1</sup>):** 3017, 2908, 1684, 1580, 1559, 1435, 1406, 1380, 1265, 1177, 957, 870, 821, 787, 764, and 750 cm<sup>-1</sup>. **m.p.:** 137.8–140.8 °C. **HRMS (DART-TOF)** calculated for C<sub>19</sub>H<sub>17</sub>N<sub>2</sub>O<sup>+</sup> [M+H]<sup>+</sup> *m/z* 289.1335, found 289.1341.

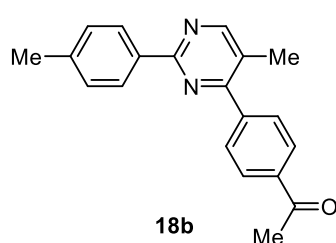

**1-(4-(5-methyl-2-(*p*-tolyl) pyrimidin-4-yl) phenyl) ethan-1-one (18b)**

Following the **General Procedure**, pyrimidinyl sulfone **13b** (64.9 mg, 0.2 mmol), (4-acetylphenyl)boronic acid **14** (65.6 mg, 0.4 mmol), Ni(COD)<sub>2</sub> (5.5 mg, 0.02 mmol), PCy<sub>3</sub>·HBF<sub>4</sub> (14.7 mg, 0.04 mmol), KOH (22.4 mg, 0.4 mmol), and THF (2.0 mL) were used. The residue was purification by flash chromatography (SiO<sub>2</sub>, petroleum ether: EtOAc = 1:0 to 10:1) afforded the title product as a white solid (35.7 mg, 59%).

**<sup>1</sup>H NMR (400 MHz, CDCl<sub>3</sub>)** δ 8.66 (s, 1H), 8.37 (d, *J* = 8.0 Hz, 2H), 8.08 (d, *J* = 8.4 Hz, 2H), 7.80 (d, *J* = 8.4 Hz, 2H), 7.28 (d, *J* = 8.0 Hz, 2H), 2.66 (s, 3H), 2.41 (s, 3H), 2.38 (s, 3H). **<sup>13</sup>C NMR (101 MHz, CDCl<sub>3</sub>)** δ 197.8, 163.7, 162.8, 159.5, 143.0, 140.8, 137.4, 134.9, 129.5, 129.4, 128.4, 128.1, 125.4, 26.9, 21.6, 17.0. **IR (thin film, cm<sup>-1</sup>):** 2922, 2860, 1685, 1581, 1532, 1424, 1356, 1265, 956, 873, 840, 792, and 748 cm<sup>-1</sup>. **m.p.:** 144.9–147.9 °C. **HRMS (DART-TOF)** calculated for C<sub>20</sub>H<sub>19</sub>N<sub>2</sub>O<sup>+</sup> [M+H]<sup>+</sup> *m/z* 303.1492, found 303.1498.

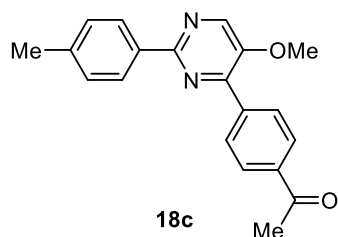

**1-(4-(5-methoxy-2-(*p*-tolyl) pyrimidin-4-yl) phenyl) ethan-1-one (18c)**

Following the **General Procedure**, pyrimidinyl sulfone **13c** (68.1 mg, 0.2 mmol), (4-acetylphenyl)boronic acid **14** (65.6 mg, 0.4 mmol), Ni(COD)<sub>2</sub> (5.5 mg, 0.02 mmol), PCy<sub>3</sub>·HBF<sub>4</sub> (14.7 mg, 0.04 mmol), KOH (22.4 mg, 0.4 mmol), and THF (2.0 mL) were used. The residue was purification by flash chromatography (SiO<sub>2</sub>, petroleum ether: EtOAc = 1:0 to 4:1) afforded the title product as a white solid (59.2 mg, 93%).

**<sup>1</sup>H NMR (400 MHz, CDCl<sub>3</sub>)** δ 8.51 (s, 1H), 8.32 (dd, *J* = 13.2, 8.0 Hz, 4H), 8.05 (d, *J* = 8.4 Hz, 2H), 7.28 (d, *J* = 8.0 Hz, 2H), 3.98 (s, 3H), 2.64 (s, 3H), 2.41 (s, 3H). **<sup>13</sup>C NMR (101 MHz, CDCl<sub>3</sub>)** δ 197.9, 157.6, 151.8, 149.9, 141.5, 140.2, 140.1, 137.7, 134.8, 130.0, 129.4, 128.1, 127.7, 56.3, 26.9, 21.5. **IR (thin film, cm<sup>-1</sup>):** 2927, 2841, 1682, 1606, 1556, 1449, 1429, 1378, 1285, 1267, 1231, 1174, 1012, 957, 849, and 788 cm<sup>-1</sup>. **m.p.:** 132.3–135.3 °C. **HRMS (DART-TOF)** calculated for C<sub>27</sub>H<sub>26</sub>ClF<sub>3</sub>N<sub>3</sub>O<sub>3</sub><sup>+</sup> [M+H]<sup>+</sup> *m/z* 319.1441, found 319.1449.

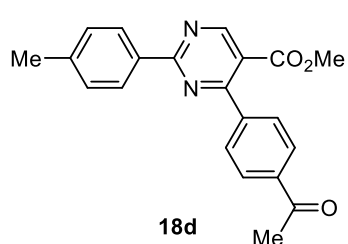

**ethyl 4-(4-acetylphenyl)-2-(*p*-tolyl) pyrimidine-5-carboxylate (18d)**

Following the **General Procedure**, pyrimidinyl sulfone **13d** (73.7 mg, 0.2 mmol), (4-acetylphenyl)boronic acid **14** (65.6 mg, 0.4 mmol), Ni(COD)<sub>2</sub> (5.5 mg, 0.02 mmol), PCy<sub>3</sub>·HBF<sub>4</sub> (14.7 mg, 0.04 mmol), KOH (22.4 mg, 0.4 mmol), and THF (2.0 mL) were used. The residue was purification by flash chromatography (SiO<sub>2</sub>, petroleum ether: EtOAc = 1:0 to 10:1) afforded the title product as a white solid (60.2 mg, 83%).

**<sup>1</sup>H NMR (400 MHz, CDCl<sub>3</sub>)** δ 9.21 (s, 1H), 8.45 (d, *J* = 8.0 Hz, 2H), 8.07 (d, *J* = 8.0 Hz, 2H), 7.77 (d, *J* = 8.0 Hz, 2H), 7.31 (d, *J* = 8.0 Hz, 2H), 4.26 (q, *J* = 7.2 Hz, 2H), 2.67 (s, 3H), 2.43

(s, 3H), 1.18 (t,  $J = 7.2$  Hz, 3H).  $^{13}\text{C}$  NMR (101 MHz,  $\text{CDCl}_3$ )  $\delta$  197.7, 165.9, 165.7, 165.4, 159.5, 142.7, 142.5, 137.9, 133.9, 129.6, 129.4, 129.0, 128.2, 121.5, 61.9, 26.9, 21.7, 13.9. IR (thin film,  $\text{cm}^{-1}$ ): 2998, 2922, 2846, 1721, 1686, 1572, 1556, 1527, 1426, 1363, 1266, 1176, 1134, 801, 749 and 684  $\text{cm}^{-1}$ . m.p.: 109.0–112.0 °C. HRMS (DART-TOF) calculated for  $\text{C}_{27}\text{H}_{26}\text{ClF}_3\text{N}_3\text{O}_3^+$   $[\text{M}+\text{H}]^+$   $m/z$  361.1547, found 361.1552.

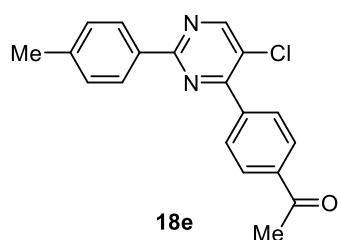

1-(4-(5-chloro-2-(*p*-tolyl) pyrimidin-4-yl) phenyl) ethan-1-one (18e)

Following the **General Procedure**, pyrimidinyl sulfone **13e** (69.0 mg, 0.2 mmol), (4-acetylphenyl)boronic acid **14** (65.6 mg, 0.4 mmol),  $\text{Ni}(\text{COD})_2$  (5.5 mg, 0.02 mmol),  $\text{PCy}_3 \cdot \text{HBF}_4$  (14.7 mg, 0.04 mmol), KOH (22.4 mg, 0.4 mmol), and THF (2.0 mL) were used. The residue was purification by flash chromatography ( $\text{SiO}_2$ , petroleum ether: EtOAc = 1:0 to 10:1) afforded the title product as a white solid (22.6 mg, 35%).

$^1\text{H}$  NMR (400 MHz,  $\text{CDCl}_3$ )  $\delta$  8.80 (s, 1H), 8.36 (d,  $J = 8.0$  Hz, 2H), 8.08 (q,  $J = 8.4$  Hz, 4H), 7.29 (d,  $J = 8.0$  Hz, 2H), 2.67 (s, 3H), 2.42 (s, 3H).  $^{13}\text{C}$  NMR (101 MHz,  $\text{CDCl}_3$ )  $\delta$  197.7, 162.9, 161.1, 158.1, 141.7, 140.5, 138.2, 133.8, 130.0, 129.6, 128.4, 128.3, 126.6, 26.9 (d,  $J = 5.2$  Hz, 2H), 21.7 (d,  $J = 5.3$  Hz). IR (thin film,  $\text{cm}^{-1}$ ): 2913, 1689, 1584, 1496, 1412, 1330, 1175, 950, 874, 783, 678, and 662  $\text{cm}^{-1}$ . m.p.: 136.9–139.9 °C. HRMS (DART-TOF) calculated for  $\text{C}_{19}\text{H}_{16}\text{ClN}_2\text{O}^+$   $[\text{M}+\text{H}]^+$   $m/z$  323.0946, found 323.0945.

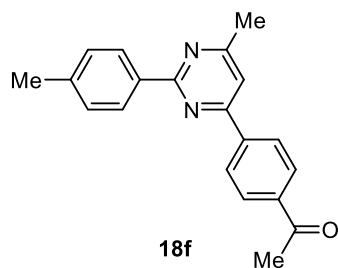

**1-(4-(6-methyl-2-(*p*-tolyl) pyrimidin-4-yl) phenyl) ethan-1-one (18f)**

Following the **General Procedure**, pyrimidinyl sulfone **13f** (64.9 mg, 0.2 mmol), (4-acetylphenyl)boronic acid **14** (65.6 mg, 0.4 mmol), Ni(COD)<sub>2</sub> (5.5 mg, 0.02 mmol), PCy<sub>3</sub>·HBF<sub>4</sub> (14.7 mg, 0.04 mmol), KOH (22.4 mg, 0.4 mmol), and THF (2.0 mL) were used. The residue was purification by flash chromatography (SiO<sub>2</sub>, petroleum ether: EtOAc = 1:0 to 10:1) afforded the title product as a white solid (47.0 mg, 78%).

**<sup>1</sup>H NMR (400 MHz, CDCl<sub>3</sub>)** δ 8.46 (d, *J* = 8.0 Hz, 2H), 8.26 (d, *J* = 8.0 Hz, 2H), 8.07 (d, *J* = 8.0 Hz, 2H), 7.44 (s, 1H), 7.30 (d, *J* = 8.0 Hz, 2H), 2.65 (s, 3H), 2.63 (s, 3H), 2.43 (s, 3H). **<sup>13</sup>C NMR (101 MHz, CDCl<sub>3</sub>)** δ 197.8, 168.2, 164.6, 162.4, 141.7, 141.0, 138.5, 135.2, 129.4, 128.8, 128.4, 127.4, 114.2, 26.9 (d, *J* = 5.7 Hz), 24.7 (d, *J* = 5.6 Hz), 21.6 (d, *J* = 5.5 Hz). **IR (thin film, cm<sup>-1</sup>):** 2926, 2852, 1684, 1587, 1568, 1504, 1368, 1265, 1176, 957, 837, 784, 764, and 750 cm<sup>-1</sup>. **m.p.:** 164.0–167.0 °C. **HRMS (DART-TOF)** calculated for C<sub>20</sub>H<sub>19</sub>N<sub>2</sub>O<sup>+</sup> [M+H]<sup>+</sup> *m/z* 303.1492, found 303.1489.

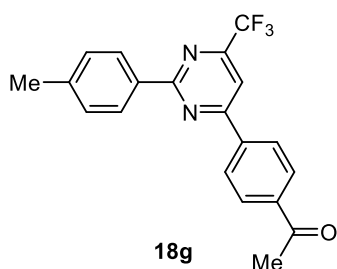

**1-(4-(2-(*p*-tolyl)-6-(trifluoromethyl) pyrimidin-4-yl) phenyl) ethan-1-one (18g)**

Following the **General Procedure**, pyrimidinyl sulfone **13g** (75.7 mg, 0.2 mmol), (4-acetylphenyl)boronic acid **14** (65.6 mg, 0.4 mmol), Ni(COD)<sub>2</sub> (5.5 mg, 0.02 mmol), PCy<sub>3</sub>·HBF<sub>4</sub> (14.7 mg, 0.04 mmol), KOH (22.4 mg, 0.4 mmol), and THF (2.0 mL) were used. The residue was purification by flash chromatography (SiO<sub>2</sub>, petroleum ether: EtOAc = 1:0 to 10:1) afforded the title product as a light yellow solid (60.6 mg, 85%).

**<sup>1</sup>H NMR (400 MHz, CDCl<sub>3</sub>)** δ 8.47 (d, *J* = 8.0 Hz, 2H), 8.29 (d, *J* = 8.0 Hz, 2H), 8.09 (d, *J* = 8.0 Hz, 2H), 7.83 (s, 1H), 7.30 (d, *J* = 8.0 Hz, 2H), 2.66 (s, 3H), 2.43 (s, 3H). **<sup>13</sup>C NMR (101 MHz, CDCl<sub>3</sub>)** δ 197.5, 165.7, 165.1 157.1 (q, *J* = 35.8 Hz), 142.4, 139.3 136.8 (d, *J* = 640.7 Hz), 133.6, 129.6, 129.0, 128.8, 127.7, 120.9 (d, *J* = 273.9 Hz), 120.8 (d, *J* = 852.8 Hz), 110.1, 26.9 (d, *J* = 5.5 Hz), 21.7 (d, *J* = 5.5 Hz). **<sup>19</sup>F NMR (376 MHz, CDCl<sub>3</sub>)** δ -69.98. **IR (thin film, cm<sup>-1</sup>):** 3089, 2913, 1690, 1578, 1509, 1431, 1394, 1379, 1267, 1183, 1159, 1139, 895, 839, 786, and 750 cm<sup>-1</sup>. **m.p.:** 169.4–172.4 °C. **HRMS (DART-TOF)** calculated for C<sub>20</sub>H<sub>16</sub>F<sub>3</sub>N<sub>2</sub>O<sup>+</sup> [M+H]<sup>+</sup> *m/z* 357.1209, found 357.1203.

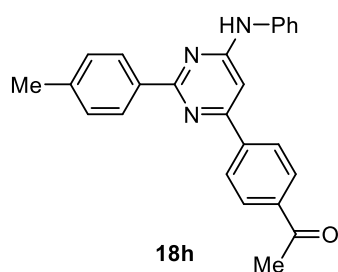

**1-(4-(6-(phenylamino)-2-(*p*-tolyl) pyrimidin-4-yl) phenyl) ethan-1-one (18h)**

Following the **General Procedure**, pyrimidinyl sulfone **13h** (80.3 mg, 0.2 mmol), (4-acetylphenyl)boronic acid **14** (65.6 mg, 0.4 mmol), Ni(COD)<sub>2</sub> (5.5 mg, 0.02 mmol), PCy<sub>3</sub>·HBF<sub>4</sub> (14.7 mg, 0.04 mmol), KOH (22.4 mg, 0.4 mmol), and THF (2.0 mL) were used. The residue was purification by flash chromatography (SiO<sub>2</sub>, petroleum ether: EtOAc: DCM = 1:0:0 to 4:1:1) afforded the title product as a light yellow solid (69.8 mg, 92%).

**<sup>1</sup>H NMR (400 MHz, DMSO-*d*<sub>6</sub>)** δ 9.80 (s, 1H), 8.38 (d, *J* = 8.0 Hz, 2H), 8.27 (d, *J* = 8.0 Hz, 2H), 8.12 (d, *J* = 8.0 Hz, 2H), 7.84 (d, *J* = 8.0 Hz, 2H), 7.41 (t, *J* = 7.6 Hz, 2H), 7.35 (d, *J* = 8.0 Hz, 2H), 7.23 (s, 1H), 7.07 (t, *J* = 7.4 Hz, 1H), 2.64 (s, 3H), 2.39 (s, 3H). **<sup>13</sup>C NMR (101 MHz, DMSO-*d*<sub>6</sub>)** δ 197.6, 163.2, 161.4, 160.3, 141.4, 140.4, 140.0, 137.9, 135.3, 129.1, 128.9, 128.8, 127.8, 126.7, 122.4, 119.8, 101.1, 26.9 (d, *J* = 7.1 Hz), 21.0 (d, *J* = 6.5 Hz). **IR (thin film, cm<sup>-1</sup>):** 3360, 3008, 1587, 1497, 1441, 1358, 1275, 1177, 949, 874, 826, 764, and 750 cm<sup>-1</sup>. **m.p.:** 216.6–219.6 °C. **HRMS (DART-TOF)** calculated for C<sub>25</sub>H<sub>22</sub>N<sub>3</sub>O<sup>+</sup> [M+H]<sup>+</sup> *m/z* 380.1757, found 380.1764.



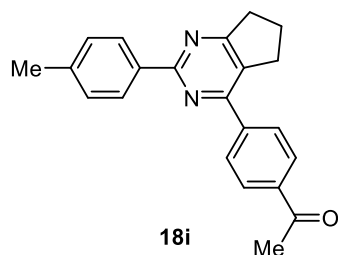

**1-(4-(2-(*p*-tolyl)-6,7-dihydro-5H-cyclopenta[d]pyrimidin-4-yl)phenyl)ethan-1-one (18i)**

Following the **General Procedure**, pyrimidinyl sulfone **13i** (70.1 mg, 0.2 mmol), (4-acetylphenyl)boronic acid **14** (65.6 mg, 0.4 mmol), Ni(COD)<sub>2</sub> (5.5 mg, 0.02 mmol), PCy<sub>3</sub>·HBF<sub>4</sub> (14.7 mg, 0.04 mmol), KOH (22.4 mg, 0.4 mmol), and THF (2.0 mL) were used. The residue was purification by flash chromatography (SiO<sub>2</sub>, petroleum ether: EtOAc = 1:0 to 10:1) afforded the title product as a light yellow solid (48.2 mg, 73%).

**<sup>1</sup>H NMR (400 MHz, CDCl<sub>3</sub>)** δ 8.42 (d, *J* = 8.0 Hz, 2H), 8.10 (q, *J* = 8.4 Hz, 4H), 7.29 (d, *J* = 8.0 Hz, 2H), 3.20 (t, *J* = 7.6 Hz, 2H), 3.11 (t, *J* = 7.6 Hz, 2H), 2.66 (s, 3H), 2.42 (s, 3H), 2.17 (p, *J* = 7.6 Hz, 2H). **<sup>13</sup>C NMR (101 MHz, CDCl<sub>3</sub>)** δ 197.9, 177.0, 163.4, 158.1, 142.6, 140.6, 137.7, 135.4, 129.3, 129.2, 129.0, 128.5, 128.2, 34.5, 30.9, 26.9 (d, *J* = 5.9 Hz), 22.9, 21.6 (d, *J* = 5.9 Hz). **IR (thin film, cm<sup>-1</sup>):** 2920, 1685, 1580, 1545, 1500, 1385, 1359, 1264, 1170, 959, 867, 777, and 590 cm<sup>-1</sup>. **m.p.:** 204.2–207.2 °C. **HRMS (DART-TOF)** calculated for C<sub>22</sub>H<sub>21</sub>N<sub>2</sub>O<sup>+</sup> [M+H]<sup>+</sup> *m/z* 329.1648, found 329.1651.

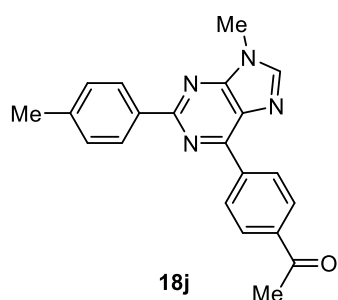

**1-(4-(9-methyl-2-(*p*-tolyl)-9H-purin-6-yl)phenyl)ethan-1-one (18j)**

Following the **General Procedure**, pyrimidinyl sulfone **13j** (72.9 mg, 0.2 mmol), (4-acetylphenyl)boronic acid **14** (65.6 mg, 0.4 mmol), Ni(COD)<sub>2</sub> (5.5 mg, 0.02 mmol), PCy<sub>3</sub>·HBF<sub>4</sub> (14.7 mg, 0.04 mmol), KOH (22.4 mg, 0.4 mmol), and THF (2.0 mL) were used. The residue was purification by flash chromatography (SiO<sub>2</sub>, petroleum ether: EtOAc: DCM = 1:0:0 to 0:4:1) afforded the title product as a white solid (35.6 mg, 52%).

**<sup>1</sup>H NMR (400 MHz, CDCl<sub>3</sub>)** δ 8.80 (d, *J* = 8.0 Hz, 2H), 8.68 (d, *J* = 8.0 Hz, 2H), 8.04 (d, *J* = 8.0 Hz, 2H), 8.00 (s, 1H), 7.37 (d, *J* = 8.0 Hz, 2H), 3.87 (s, 3H), 2.65 (s, 3H), 2.46 (s, 3H). **<sup>13</sup>C NMR (101 MHz, CDCl<sub>3</sub>)** δ 198.2, 157.2, 154.1, 153.6, 145.1, 142.7, 141.5, 137.9, 133.3, 129.8, 129.7, 129.4, 128.5, 128.4, 29.7, 26.9, 21.7. **IR (thin film, cm<sup>-1</sup>):** 3003, 2908, 1591, 1496, 1386, 1336, 1276, 1261, 1173, 950, 873, 764, and 750 cm<sup>-1</sup>. **m.p.:** 228.4–231.4 °C. **HRMS (DART-TOF)** calculated for C<sub>21</sub>H<sub>19</sub>N<sub>4</sub>O<sup>+</sup> [M+H]<sup>+</sup> *m/z* 343.1553, found 343.1558.

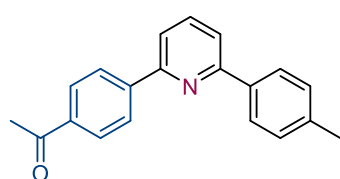

**20d**

**1-(4-(6-(*p*-tolyl) pyridin-2-yl) phenyl) ethan-1-one (20d)**

Following the **General Procedure**, pyridinyl sulfone **19d** (61.9 mg, 0.2 mmol), (4-acetylphenyl)boronic acid **14** (65.6 mg, 0.4 mmol), Ni(COD)<sub>2</sub> (5.5 mg, 0.02 mmol), PCy<sub>3</sub>·HBF<sub>4</sub> (14.7 mg, 0.04 mmol), KOH (22.4 mg, 0.4 mmol), and THF (2.0 mL) were used. The residue was purification by flash chromatography (SiO<sub>2</sub>, petroleum ether: EtOAc = 1:0 to 10:1) afforded the title product as a white solid (41.4 mg, 72%).

**<sup>1</sup>H NMR (400 MHz, CDCl<sub>3</sub>)** δ 8.23 (d, *J* = 8.0 Hz, 2H), 8.05 (t, *J* = 8.4 Hz, 4H), 7.80 (t, *J* = 8.0 Hz, 1H), 7.69 (dd, *J* = 8.0, 2.8 Hz, 2H), 7.30 (d, *J* = 7.6 Hz, 2H), 2.64 (s, 3H), 2.42 (s, 3H). **<sup>13</sup>C NMR (101 MHz, CDCl<sub>3</sub>)** δ 198.0, 143.9, 139.3, 137.7, 137.2, 136.5, 129.6, 128.8, 127.2, 126.9, 119.2, 118.9, 26.8, 21.4. **IR (thin film, cm<sup>-1</sup>):** 3056, 2925, 1685, 1588, 1419, 1279, 1265, 1116, 893, 855, 797, 760, and 753 cm<sup>-1</sup>. **m.p.:** 165.4–168.4 °C. **HRMS (DART-TOF)** calculated for C<sub>20</sub>H<sub>18</sub>NO<sup>+</sup> [M+H]<sup>+</sup> *m/z* 288.1383, found 288.1390.

## 9. References

- 1 Q. Z. Zhou, B. Zhang, L. J. Su, T. S. Jiang, R. N. Chen, T. Q. Du, Y. Y. Ye, J. F. Shen, G. L. Dai, D. M. Han and H. J. Jiang, Palladium-catalyzed highly regioselective 2-arylation of 2,x-dibromopyridines and its application in the efficient synthesis of a 17b-HSD1 inhibitor, *Tetrahedron*, 2013, **69**, 10996–11003.
- 2 Y. Yuan, I. Thomé, S. H. Kim, D. T. Chen, A. Beyer, J. Bonnamour, E. Zuidema, S. Chang and C. Bolm, Dimethyl Sulfoxide/Potassium Hydroxide: A Superbase for the Transition Metal-Free Preparation of Cross-Coupling Products, *Adv. Synth. Catal.*, 2010, **352**, 2892–2898.
- 3 M. G. Bursavich, D. Dastrup, M. Shenderovich, K. M. Yager, D. M. Cimbora, B. Williams and D. V. Kumar, Novel Mps1 kinase inhibitors: From purine to pyrrolopyrimidine and quinazoline leads, *Bioorg. Med. Chem. Lett.*, 2013, **23**, 6829–6833.
- 4 X. H. Hong, H. Wang, B. X. Liu and B. Xu, Ruthenium-catalyzed double-fold C–H tertiary alkoxyacylation of arenes using di-*tert*-butyl decarbonate, *Chem. Commun.*, 2014, **50**, 14129–14132.
- 5 W. J. Sun, S. Q. Hu, S. B. Fang and H. Yan, Design, synthesis and biological evaluation of pyrimidine-based derivatives as VEGFR-2 tyrosine kinase inhibitors, *Bioorg. Chem.*, 2018, **78**, 393–405.

## 10. NMR Spectra

CDCl<sub>3</sub>, 400.13 MHz

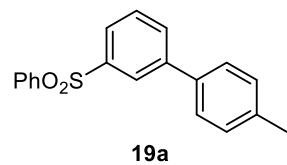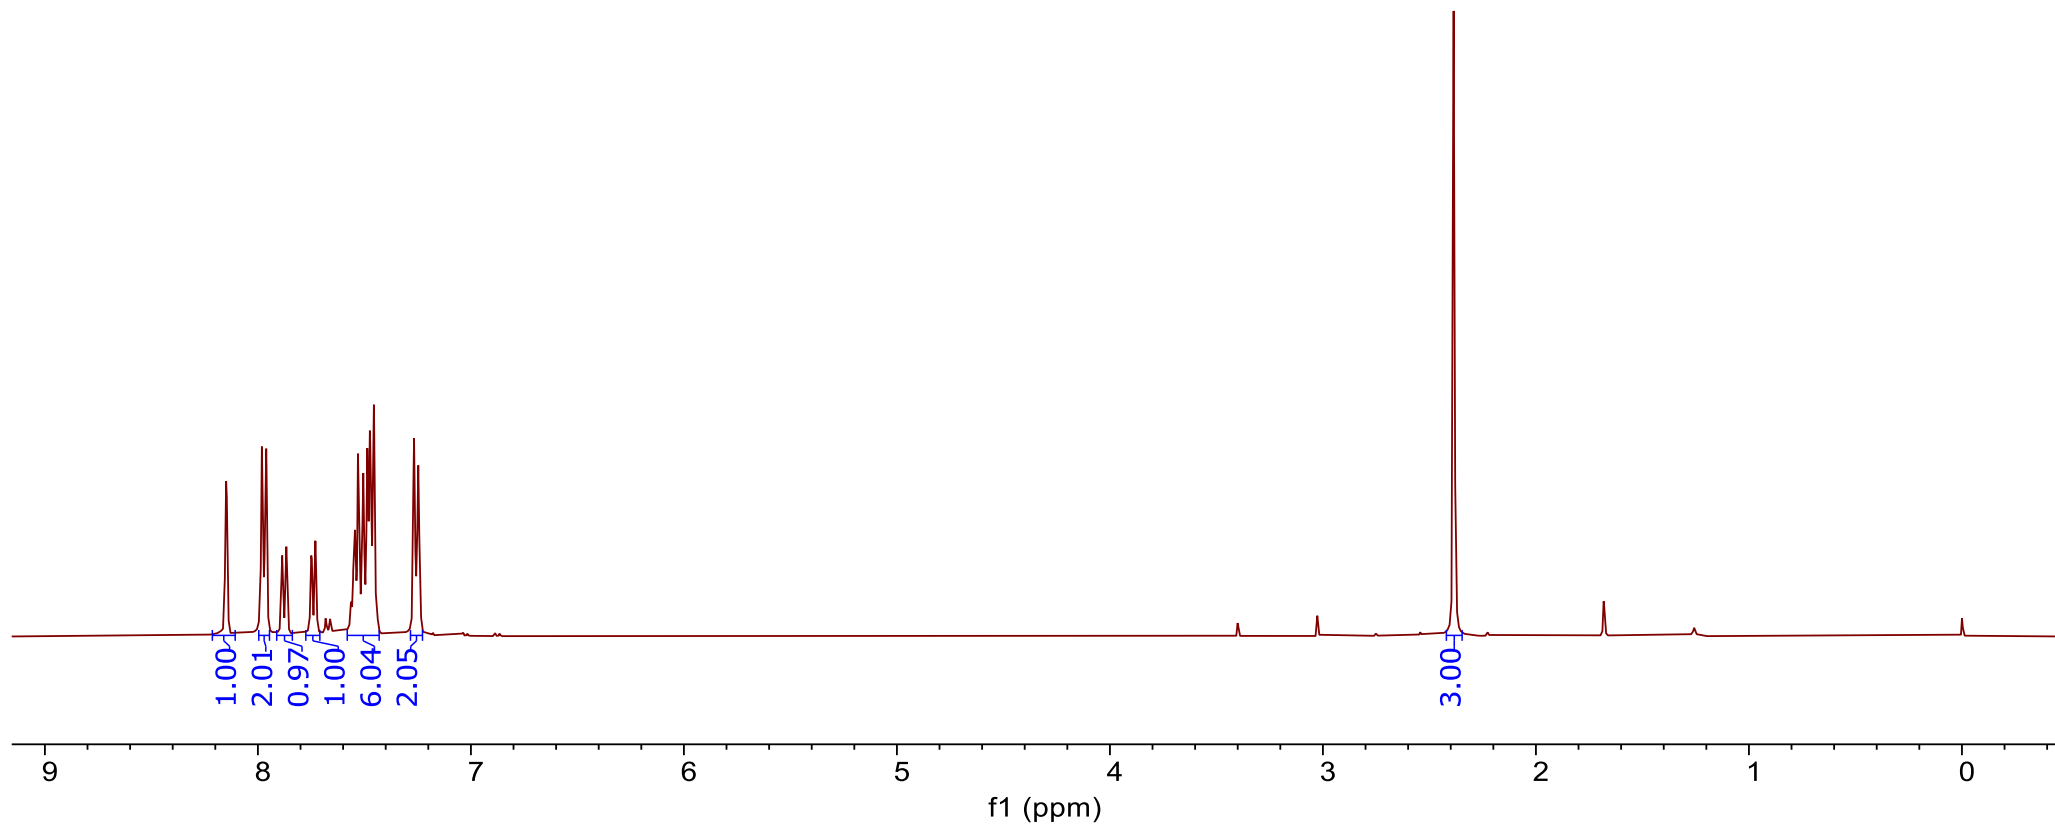

<sup>1</sup>H NMR Spectrum of **19a**

CDCl<sub>3</sub>, 100.62 MHz

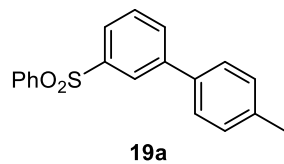

142.63  
142.22  
141.69  
138.38  
136.31  
133.31  
131.65  
129.86  
129.81  
129.40  
127.75  
127.10  
126.08  
125.95

— 21.22

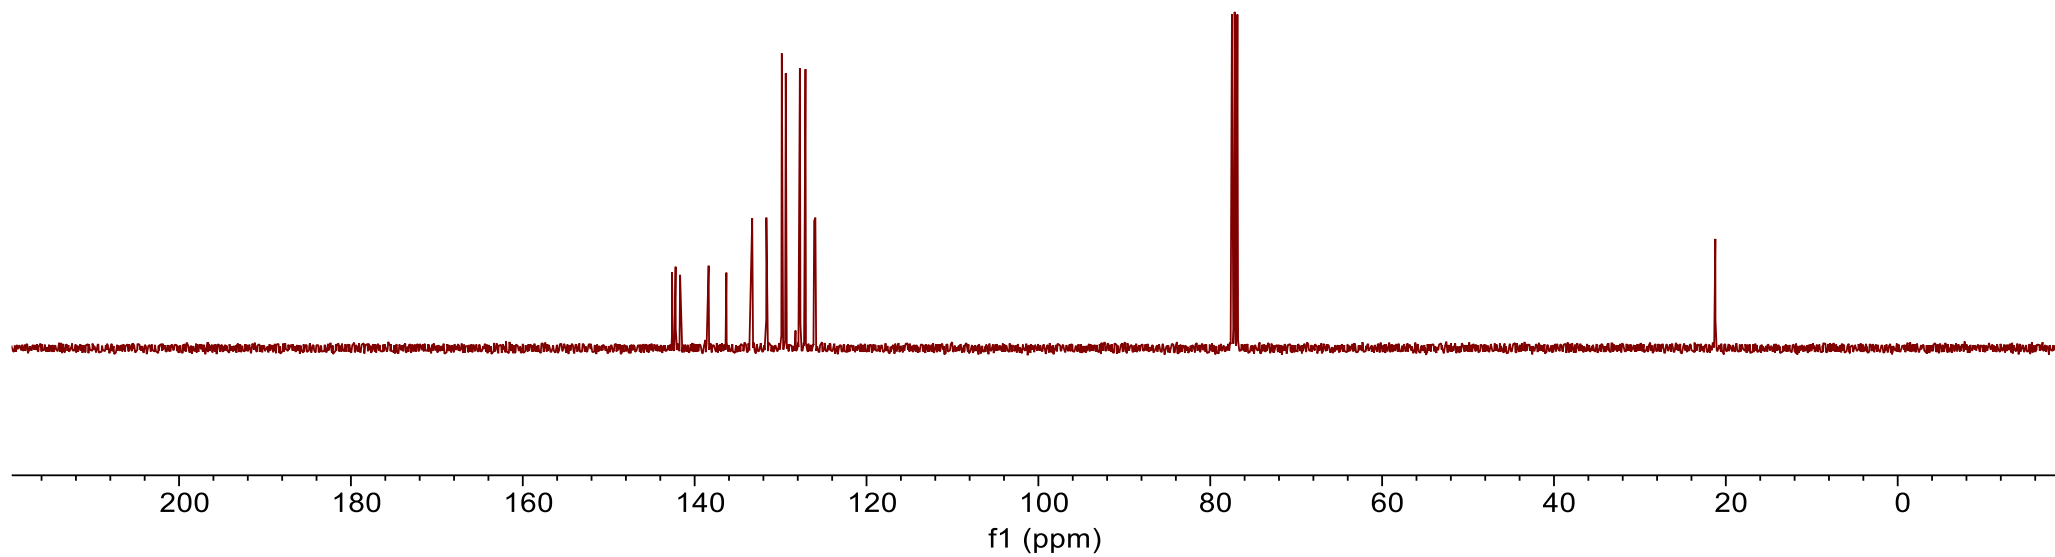

<sup>13</sup>C NMR Spectrum of **19a**

CDCl<sub>3</sub>, 400.13 MHz

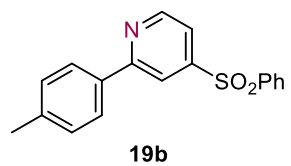

0.00

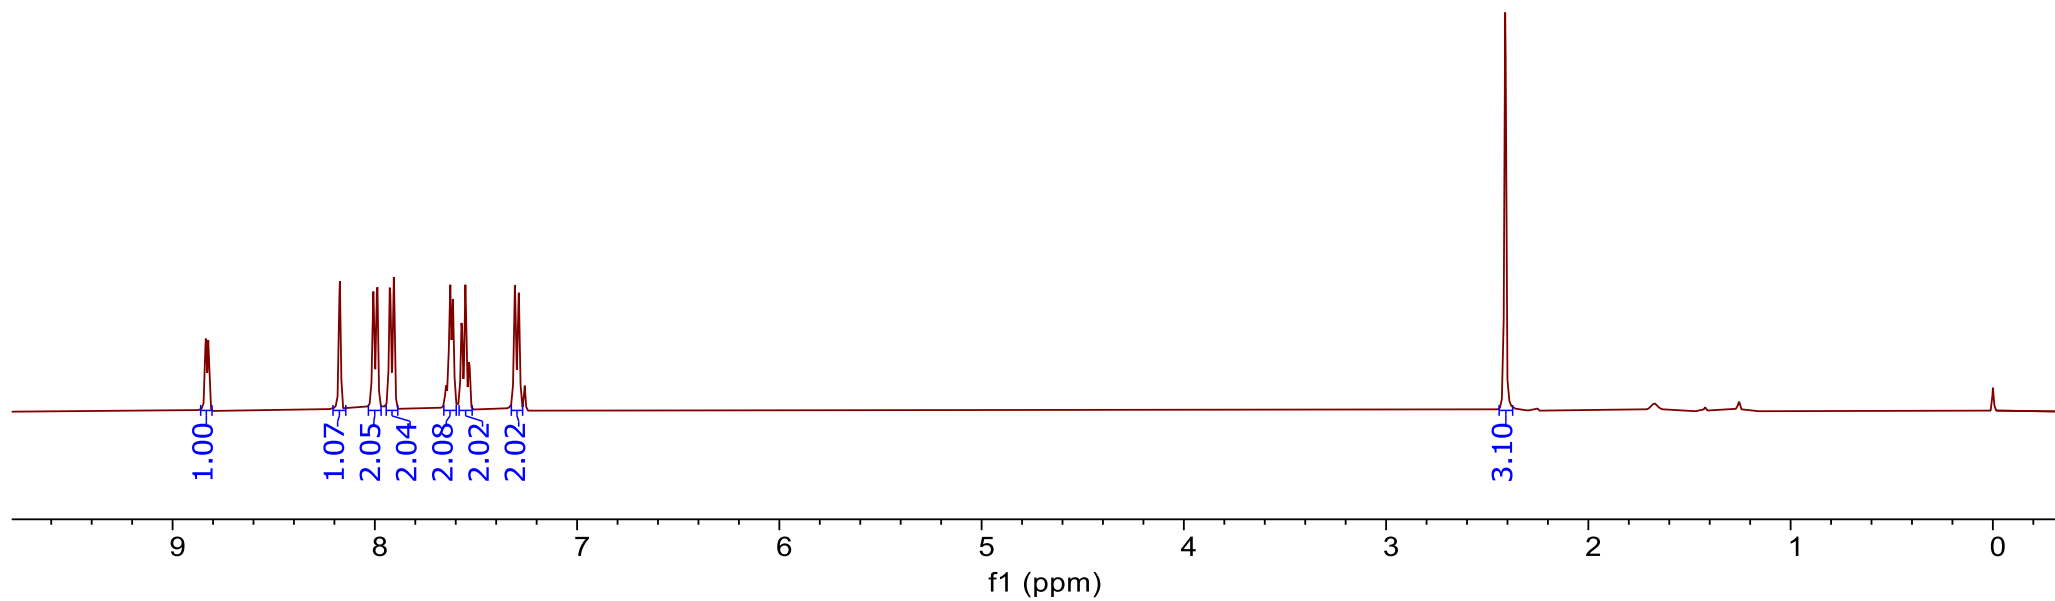

<sup>1</sup>H NMR Spectrum of **19b**

CDCl<sub>3</sub>, 100.62 MHz

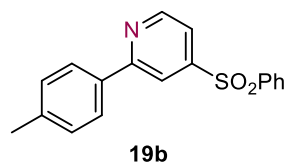

159.44  
151.05  
150.66  
140.49  
140.05  
135.05  
134.19  
129.86  
129.74  
128.22  
127.12  
118.54  
117.03

21.46

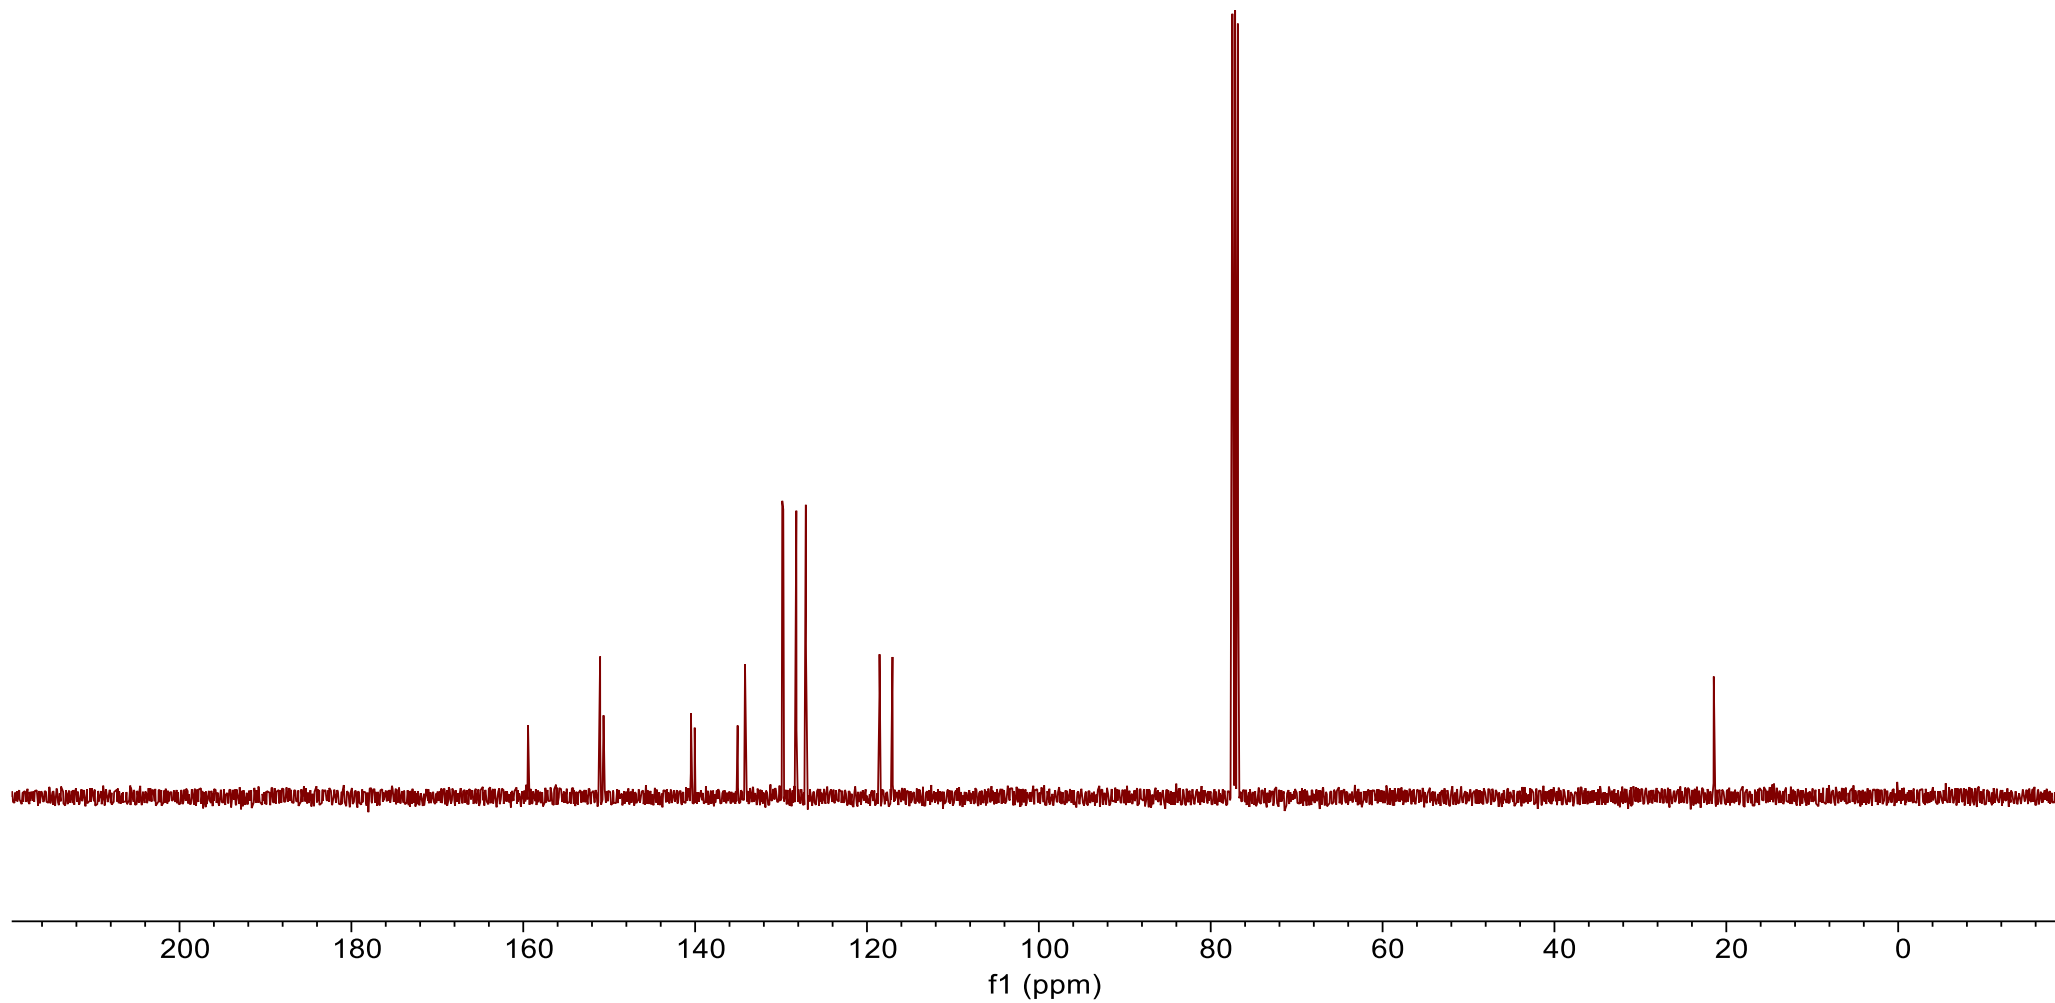

<sup>13</sup>C NMR Spectrum of 19b



CDCl<sub>3</sub>, 400.13 MHz

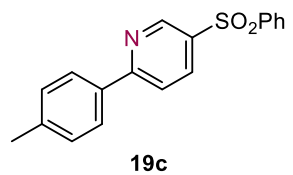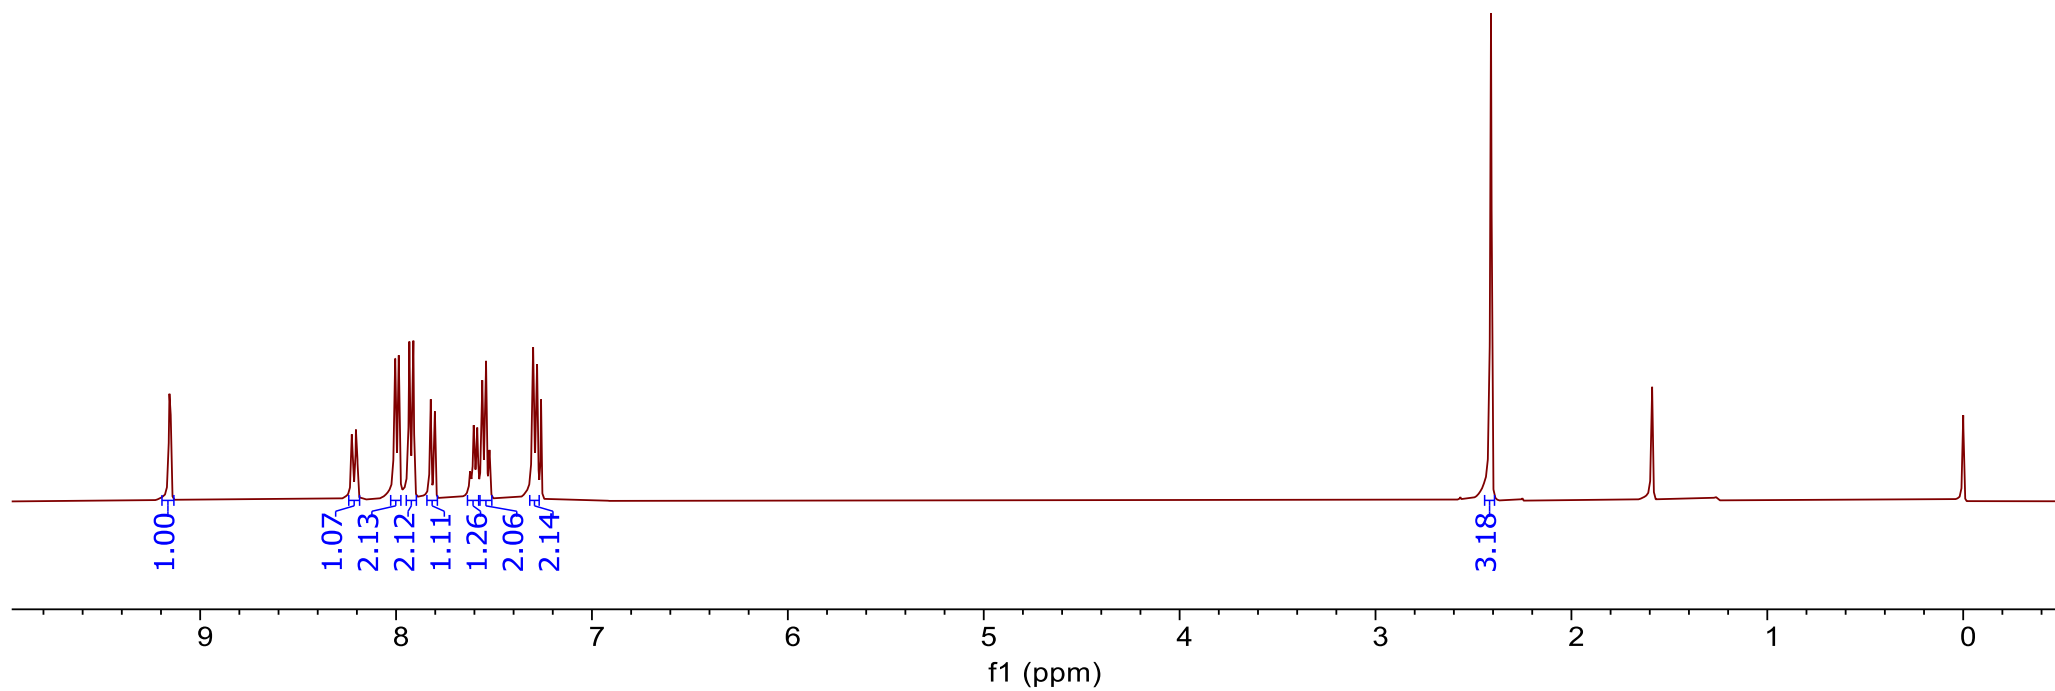

<sup>1</sup>H NMR Spectrum of **19c**

CDCl<sub>3</sub>, 100.62 MHz

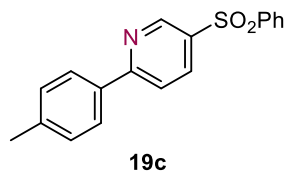

161.44  
148.86  
141.38  
141.05  
136.12  
135.86  
134.76  
133.76  
129.91  
129.67  
127.82  
127.50  
120.00

21.53

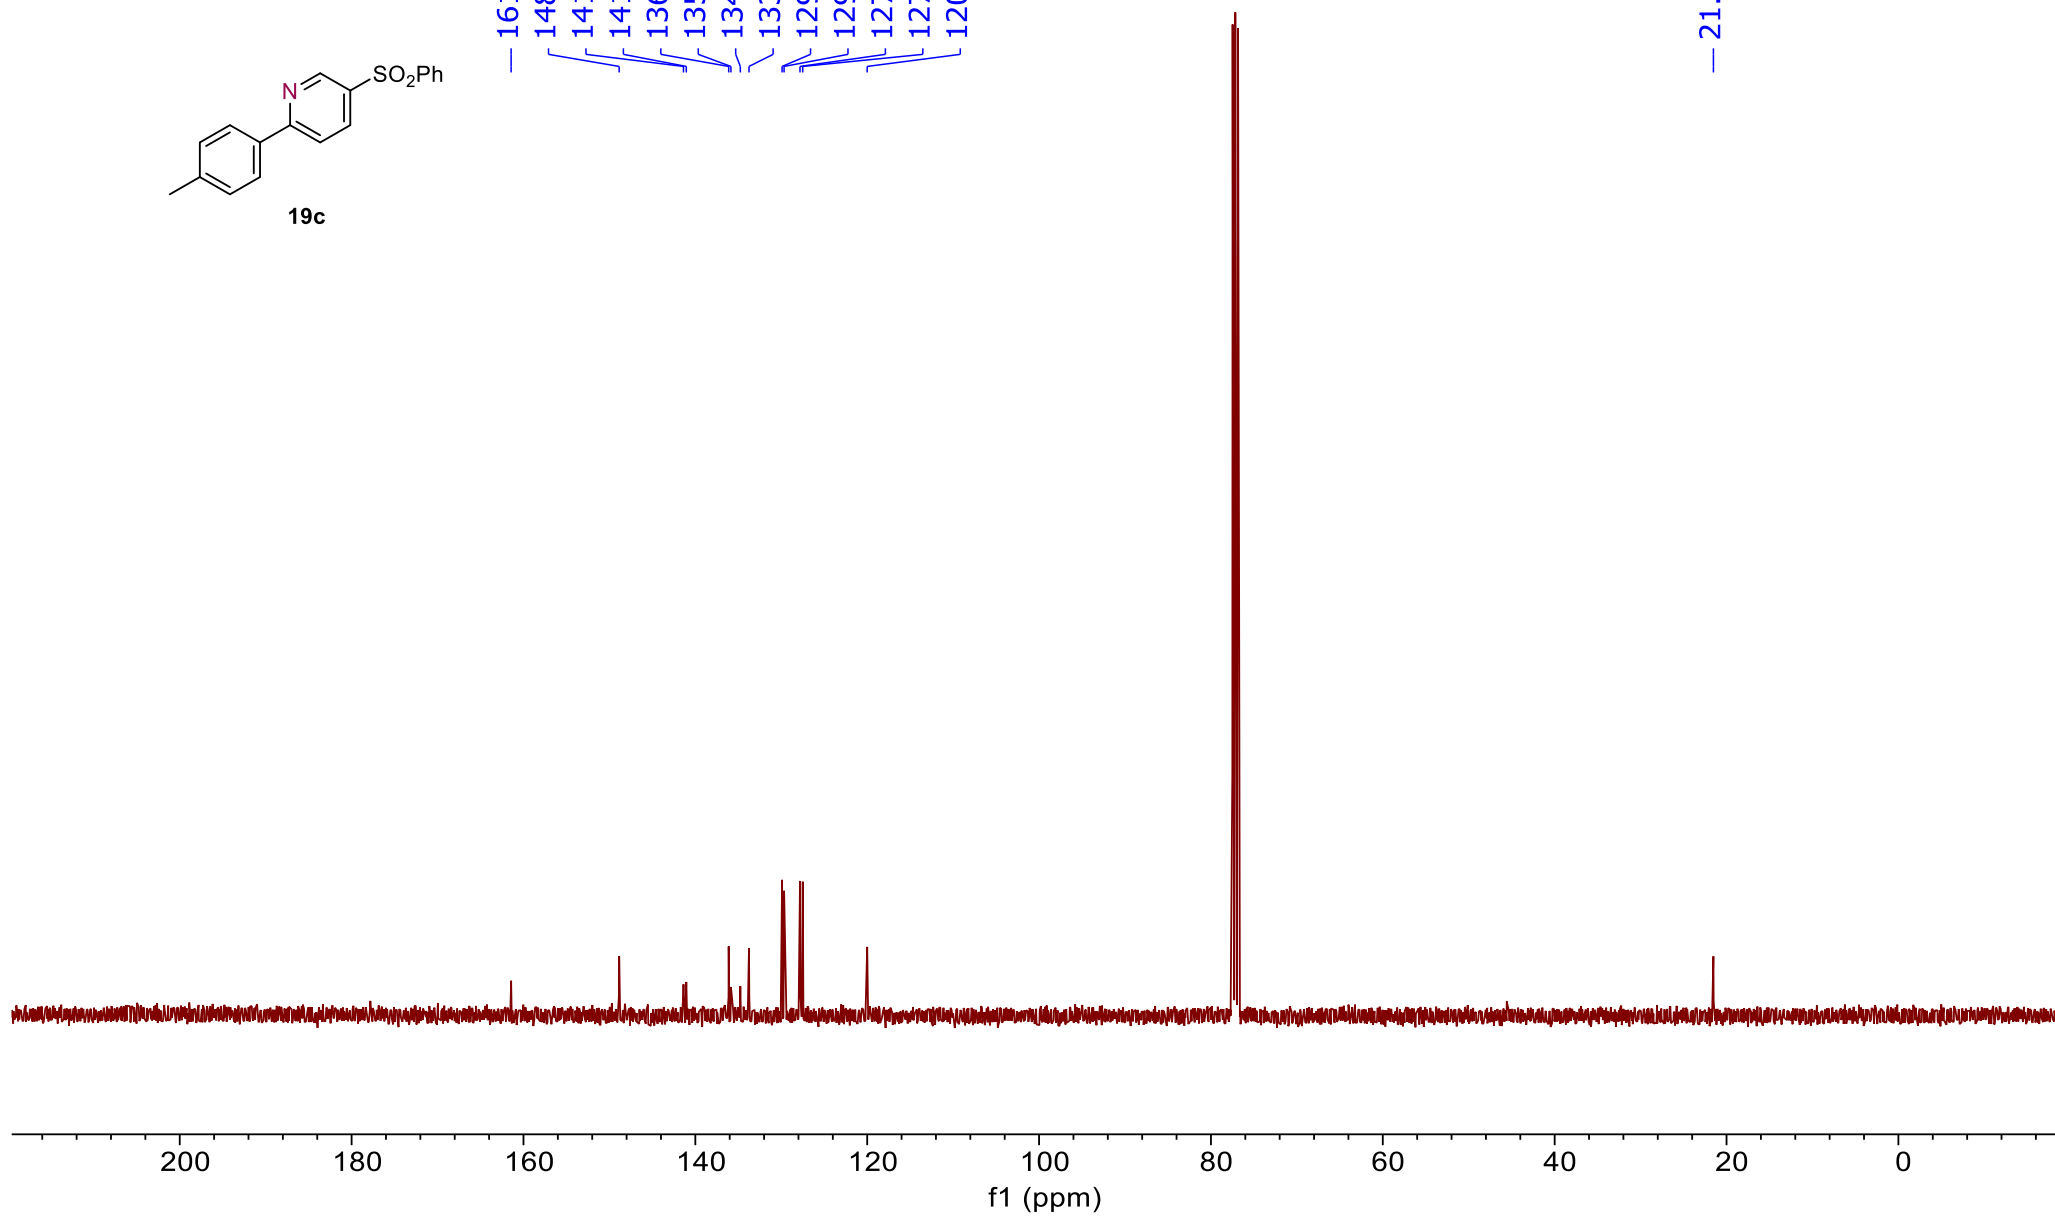

<sup>13</sup>C NMR Spectrum of **19c**

CDCl<sub>3</sub>, 400.13 MHz

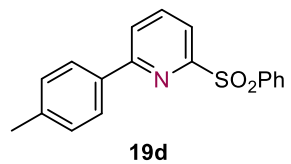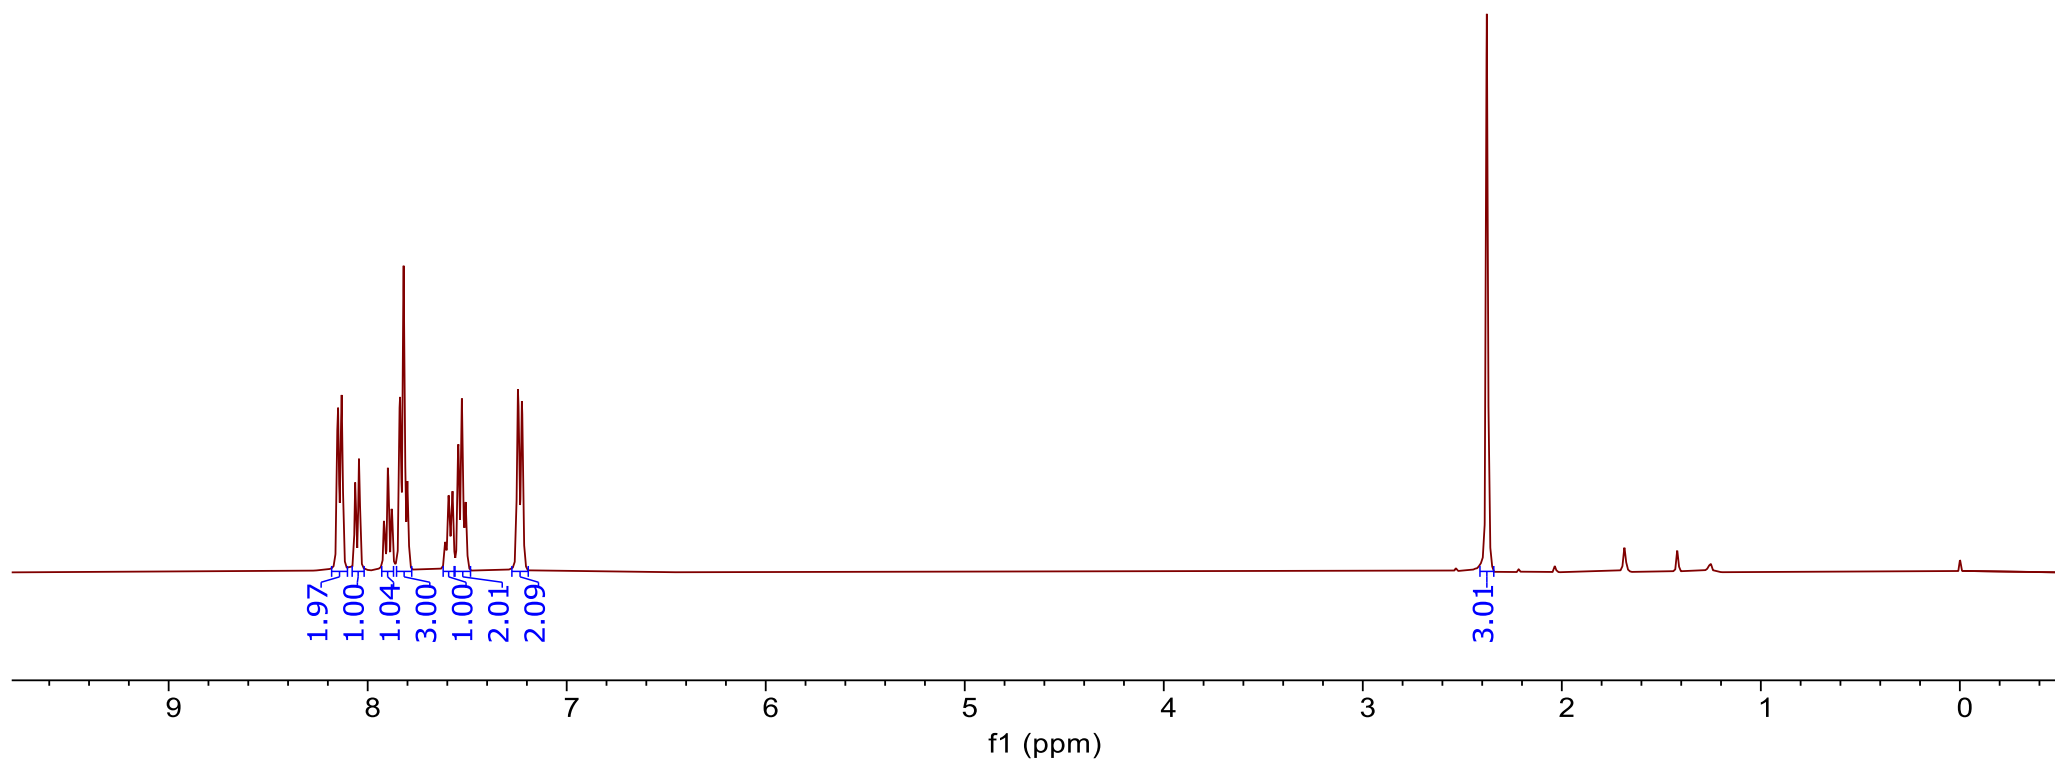

<sup>1</sup>H NMR Spectrum of **19d**

0.00

CDCl<sub>3</sub>, 100.62 MHz

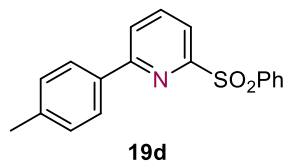

158.65  
158.09  
140.36  
139.09  
138.70  
134.45  
133.74  
129.67  
129.26  
129.02  
127.00  
122.86  
119.54

— 21.41

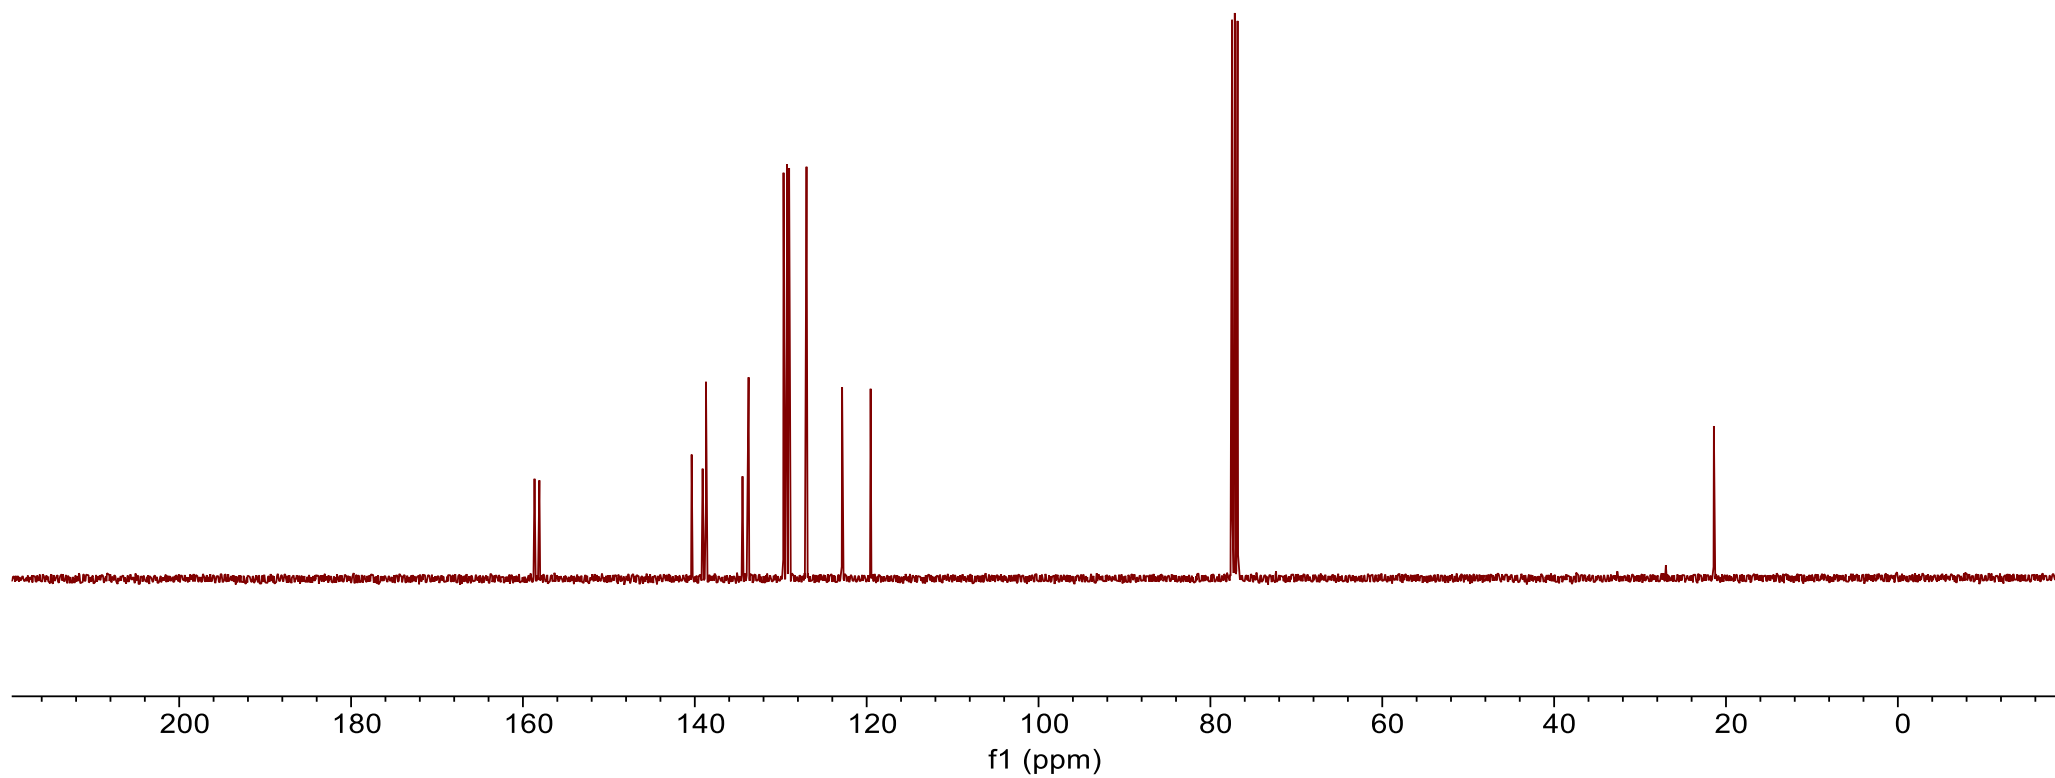

<sup>13</sup>C NMR Spectrum of **19d**

CDCl<sub>3</sub>, 400.13 MHz

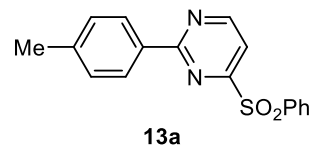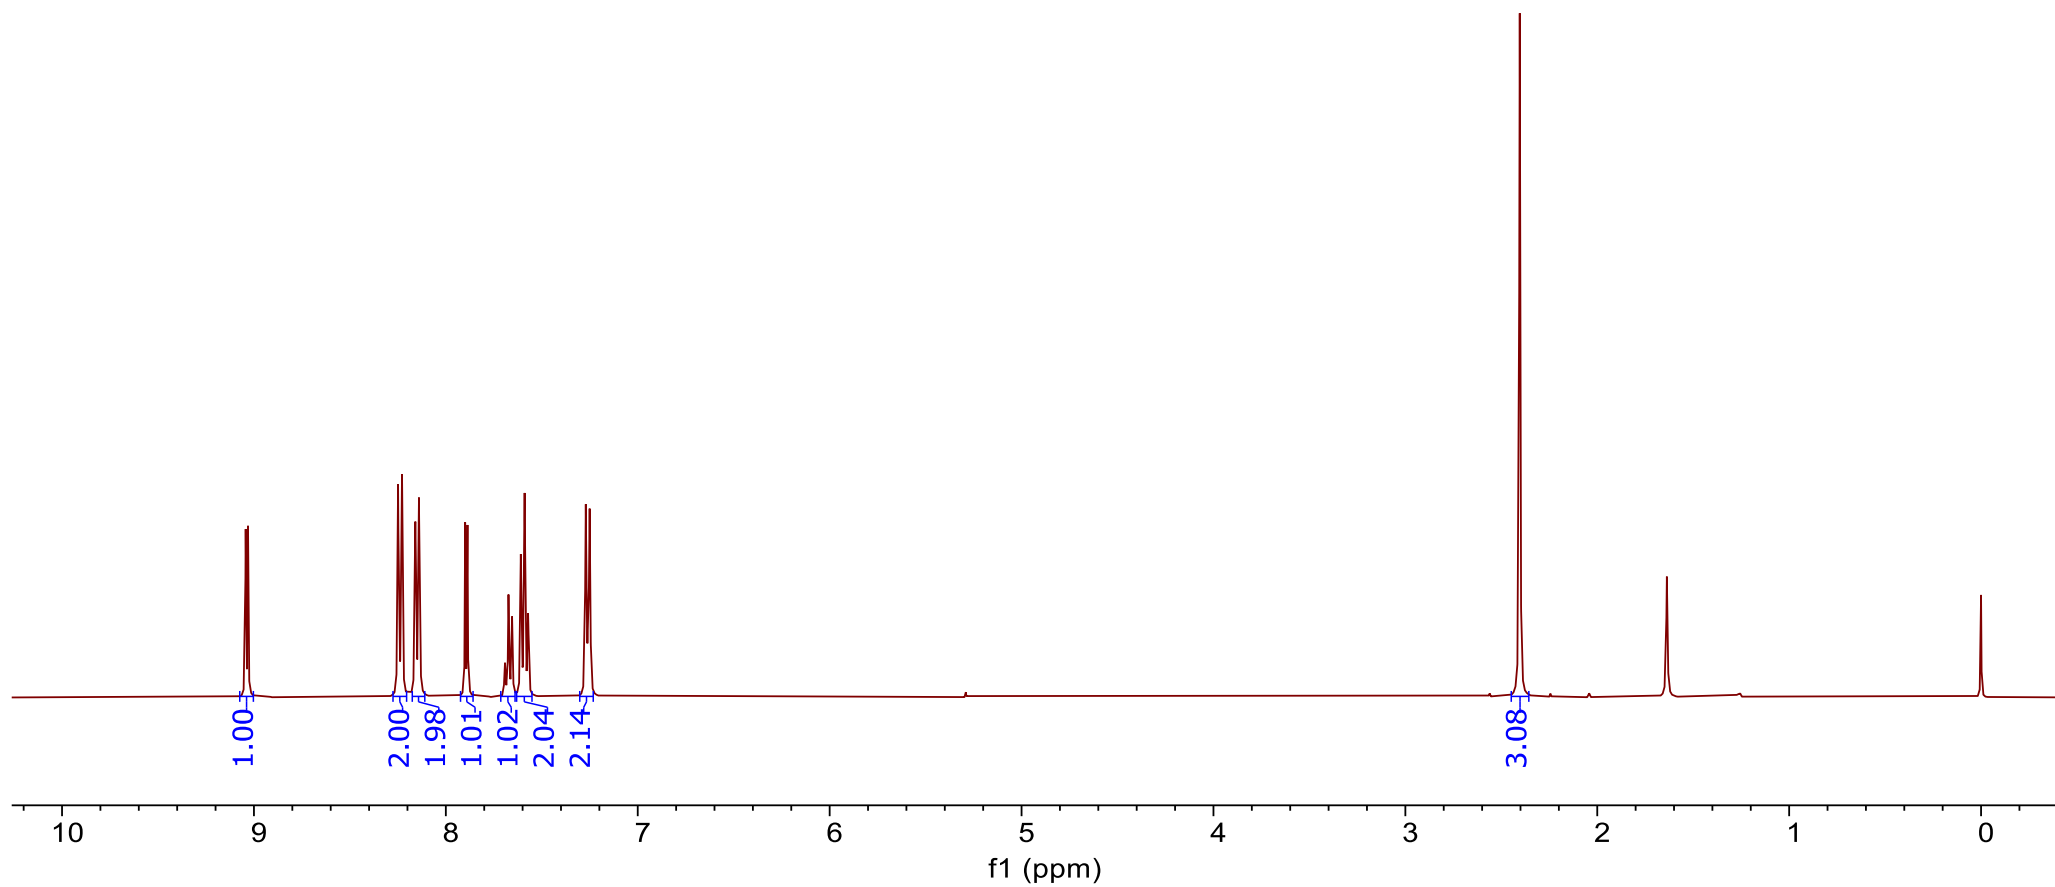

<sup>1</sup>H NMR Spectrum of **13a**

CDCl<sub>3</sub>, 100.62 MHz

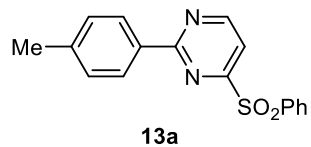

167.00  
165.67  
160.36  
142.54  
137.50  
134.56  
133.24  
129.70  
129.62  
129.33  
128.70  
114.41

21.71  
21.67

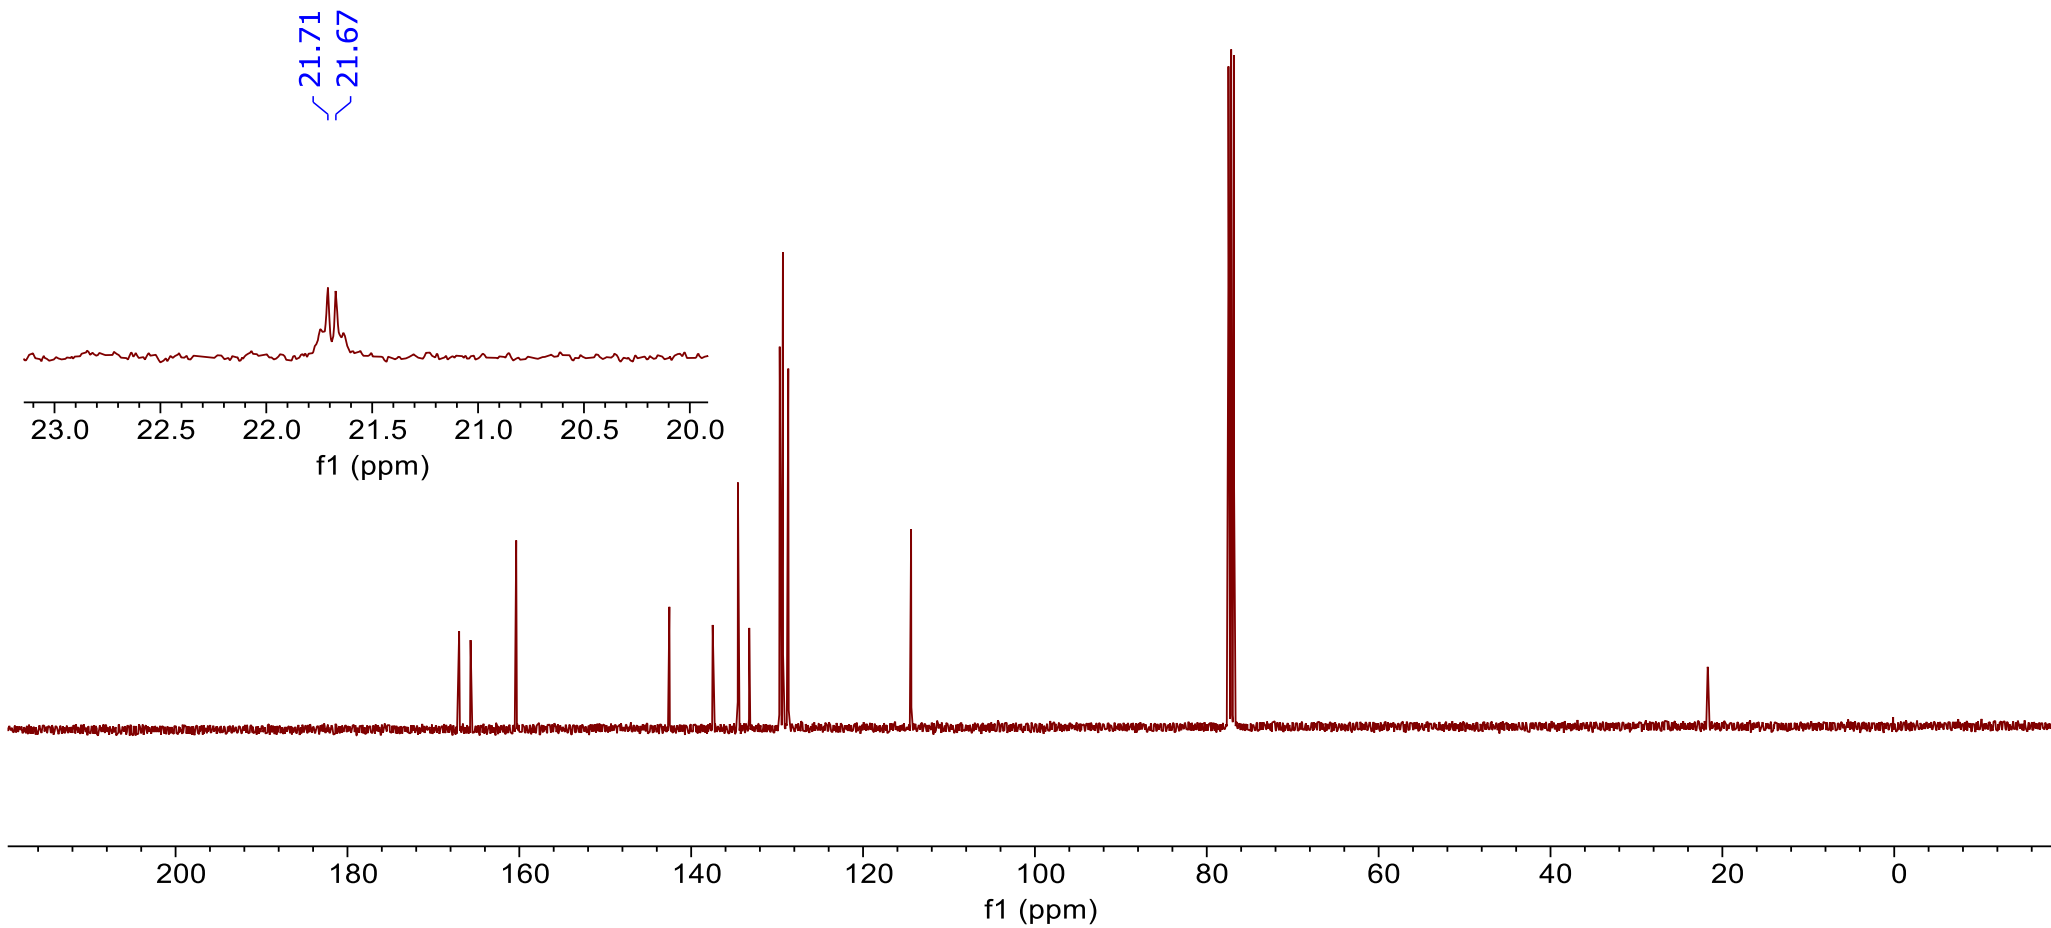

<sup>13</sup>C NMR Spectrum of **13a**

CDCl<sub>3</sub>, 400.13 MHz

— 0.00

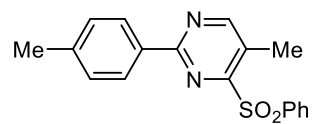

13b

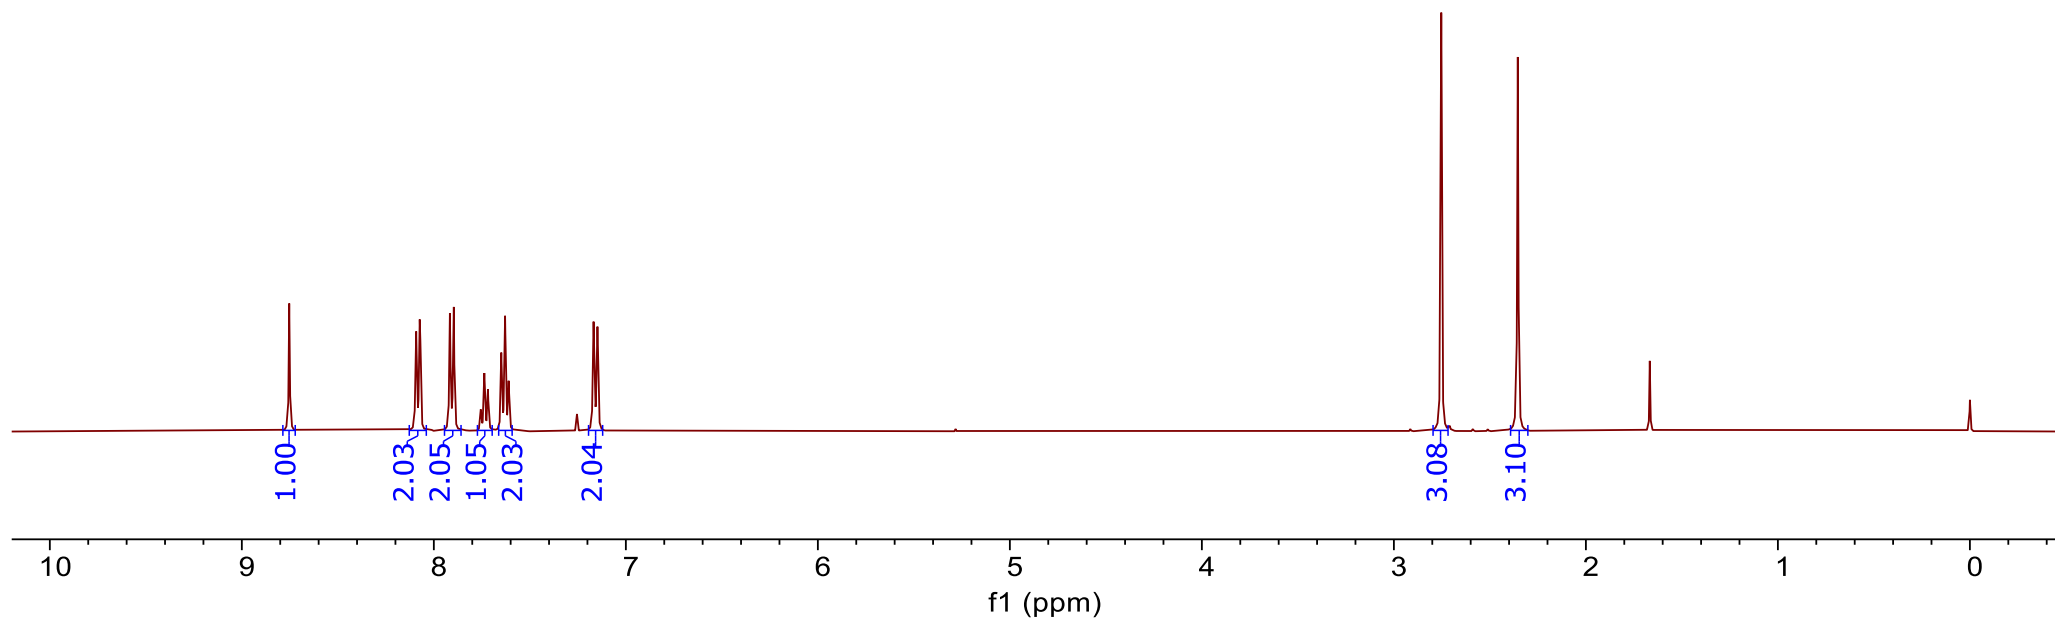

<sup>1</sup>H NMR Spectrum of 13b

CDCl<sub>3</sub>, 100.62 MHz

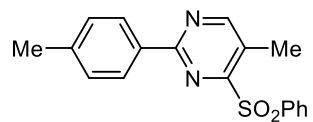

164.12  
162.30  
162.18  
141.78  
137.37  
134.24  
133.25  
130.07  
129.45  
128.93  
128.04  
125.38

21.59  
21.55  
15.18  
15.15

21.59  
21.55

15.18  
15.15

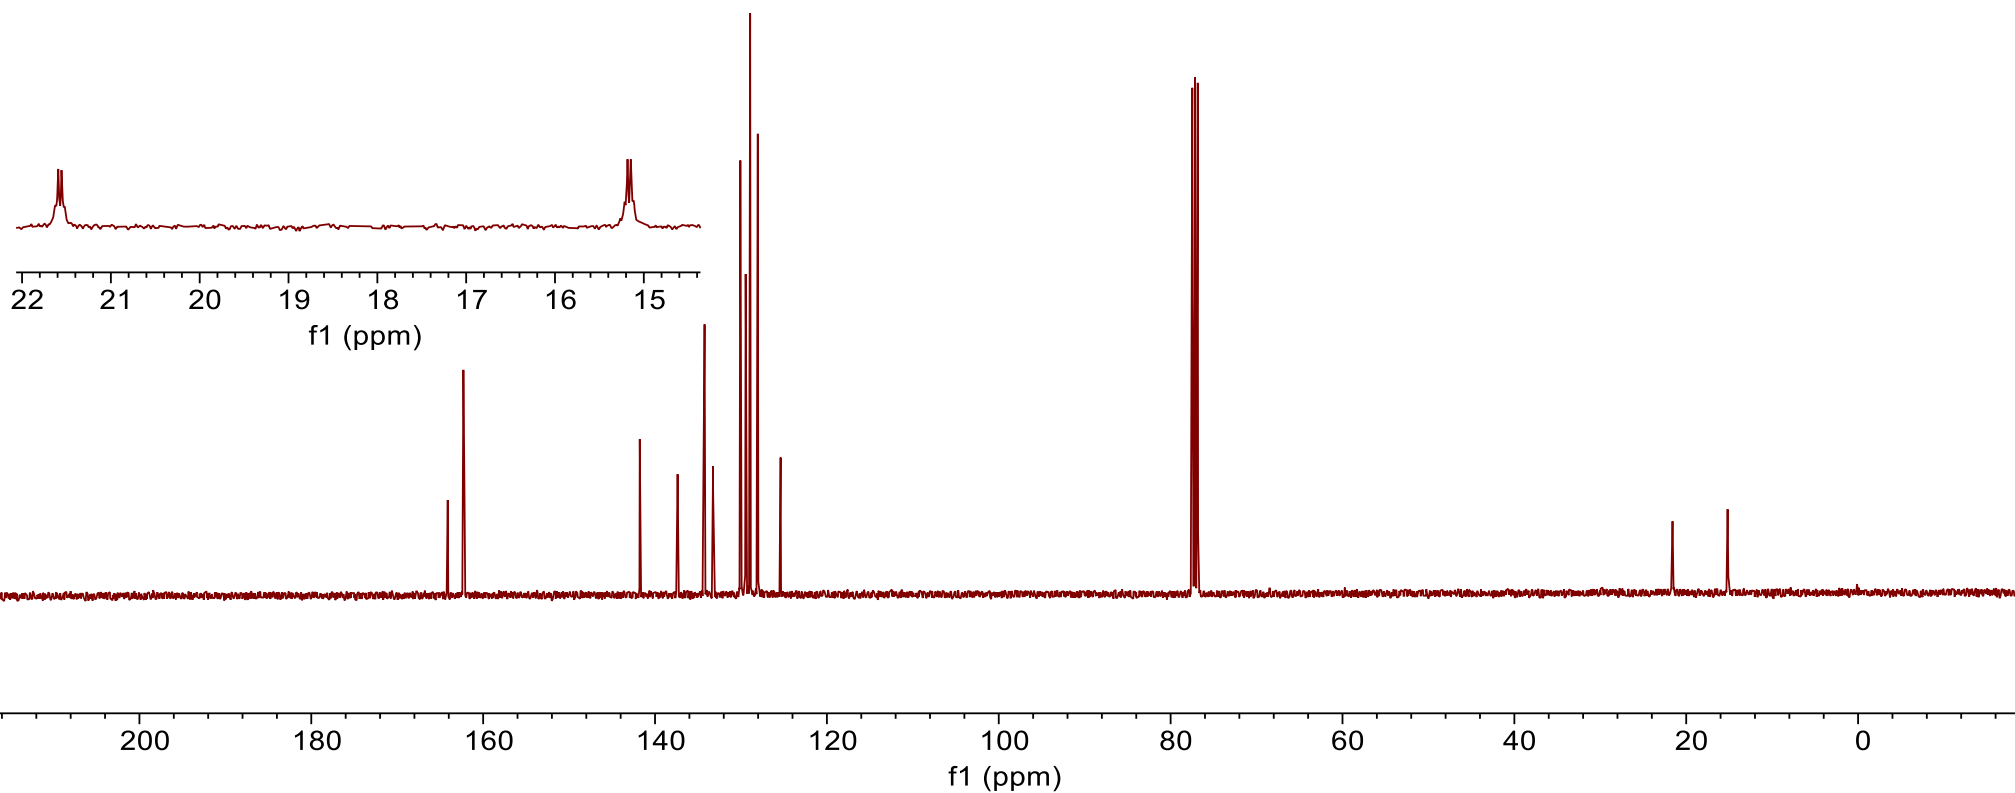

<sup>13</sup>C NMR Spectrum of **13b**



CDCl<sub>3</sub>, 400.13 MHz

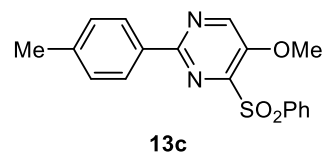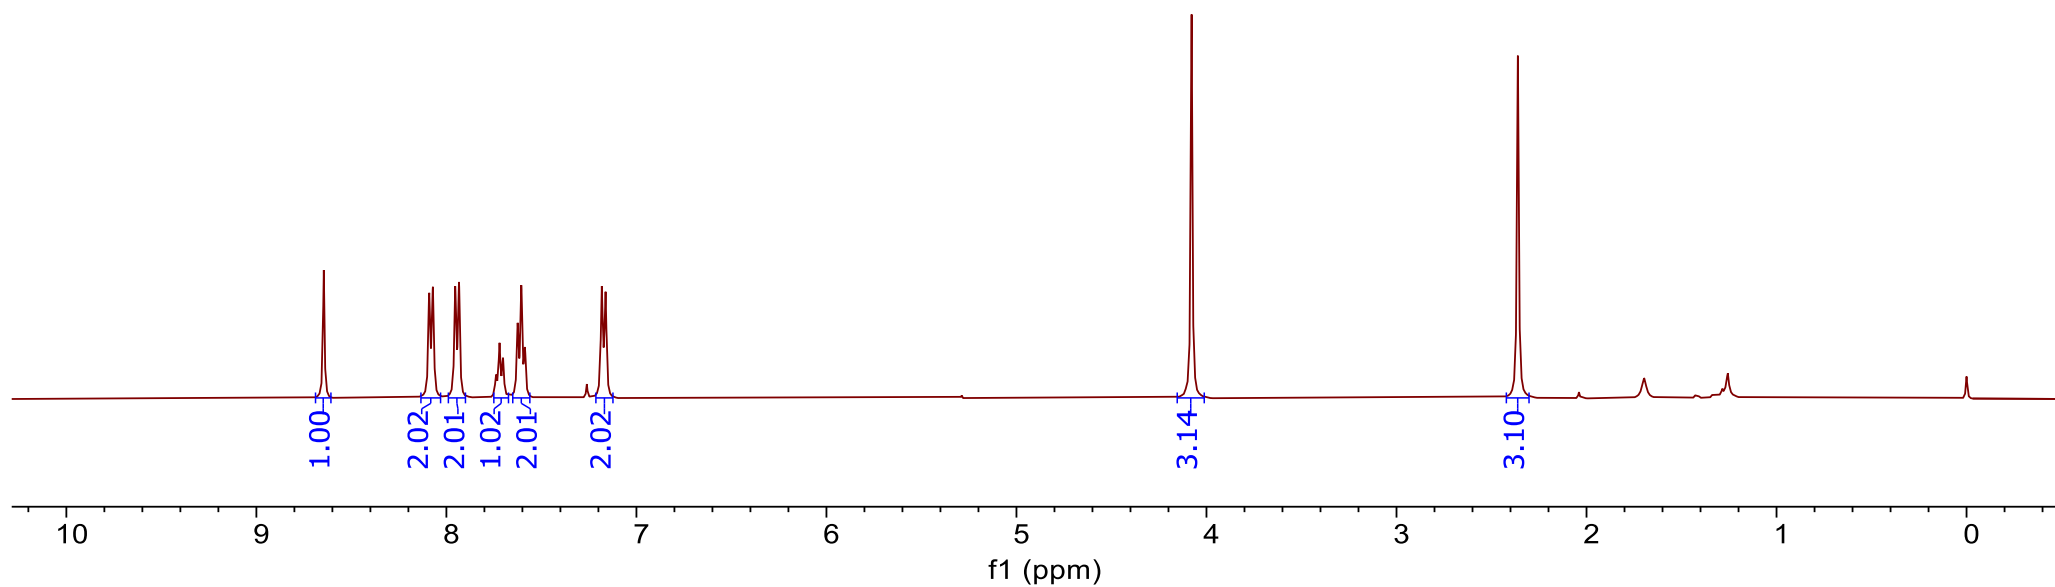

0.00

CDCl<sub>3</sub>, 100.62 MHz

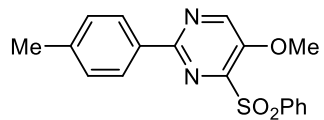

13c

156.68  
153.21  
148.37  
144.34  
141.00  
137.83  
134.23  
133.19  
129.97  
129.45  
128.89  
127.75

57.25  
57.20

21.53  
21.49

57.25  
57.20

21.53  
21.49

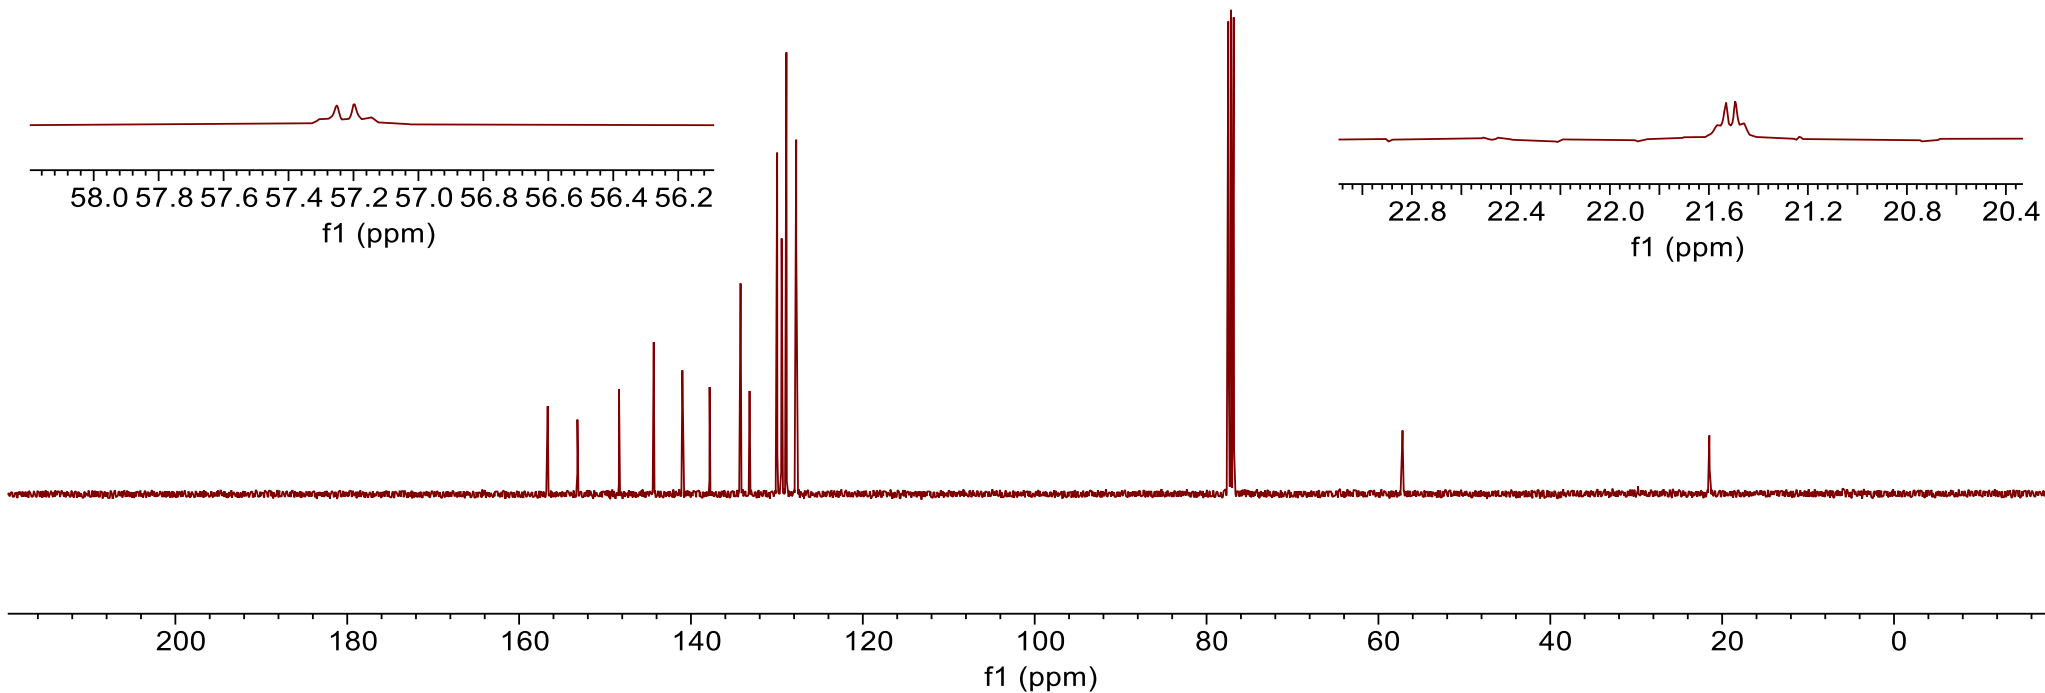

<sup>13</sup>C NMR Spectrum of 13c

CDCl<sub>3</sub>, 400.13 MHz

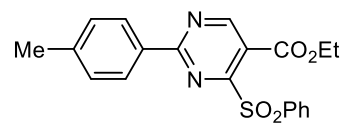

13d

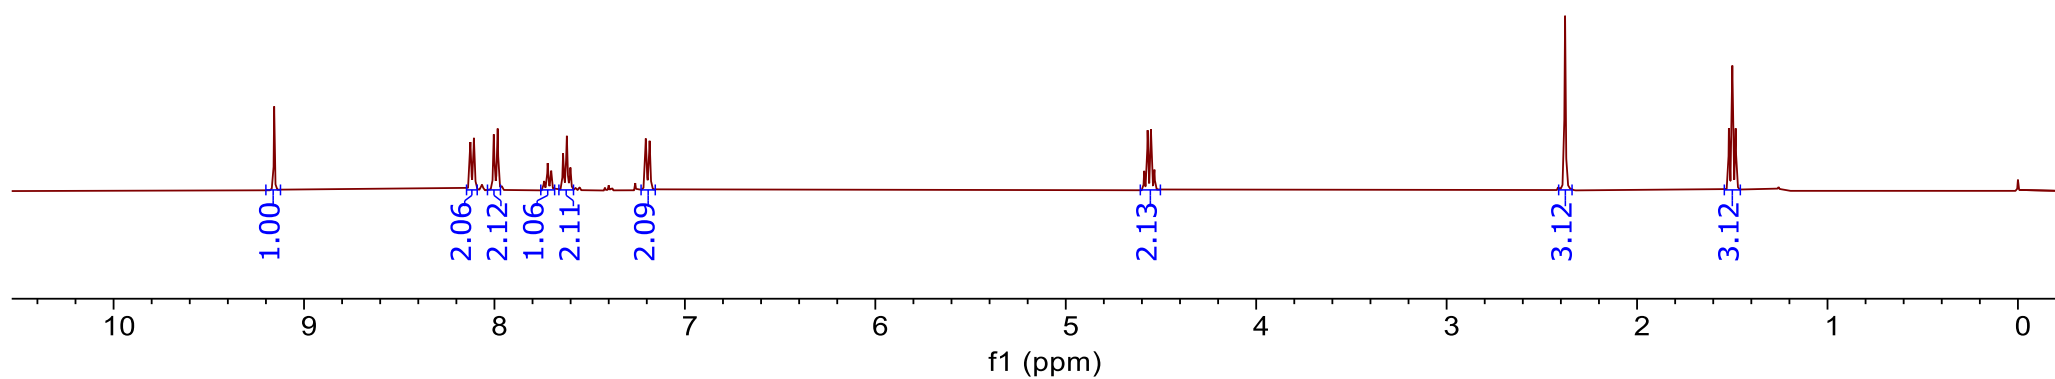

<sup>1</sup>H NMR Spectrum of 13d

CDCl<sub>3</sub>, 100.62 MHz

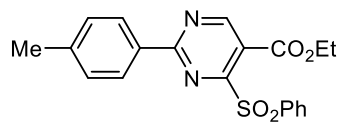

165.53  
164.84  
163.95  
160.14  
143.37  
137.56  
134.39  
132.44  
130.21  
129.67  
129.02  
129.00  
120.99

— 63.24

21.72  
21.68  
— 14.09

21.72  
21.68

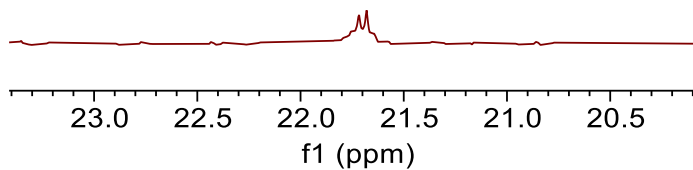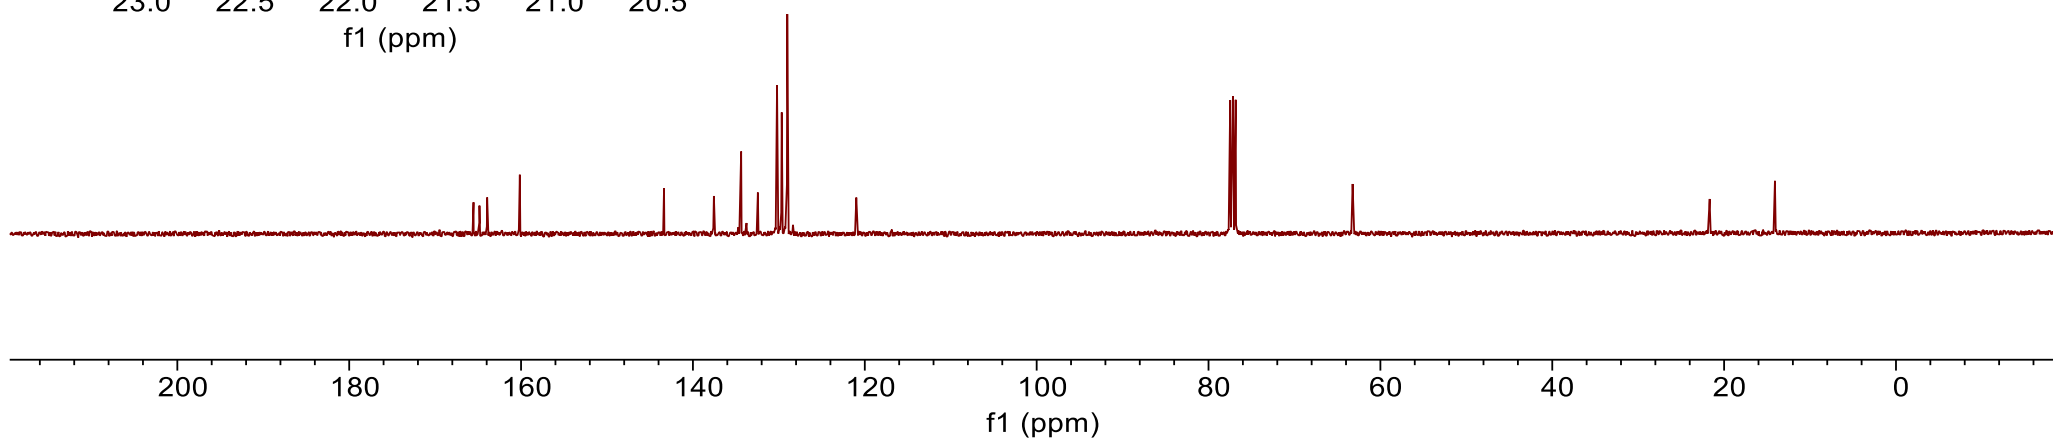

<sup>13</sup>C NMR Spectrum of 13d

CDCl<sub>3</sub>, 400.13 MHz

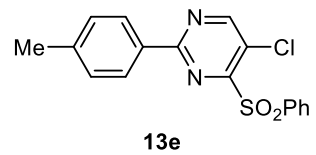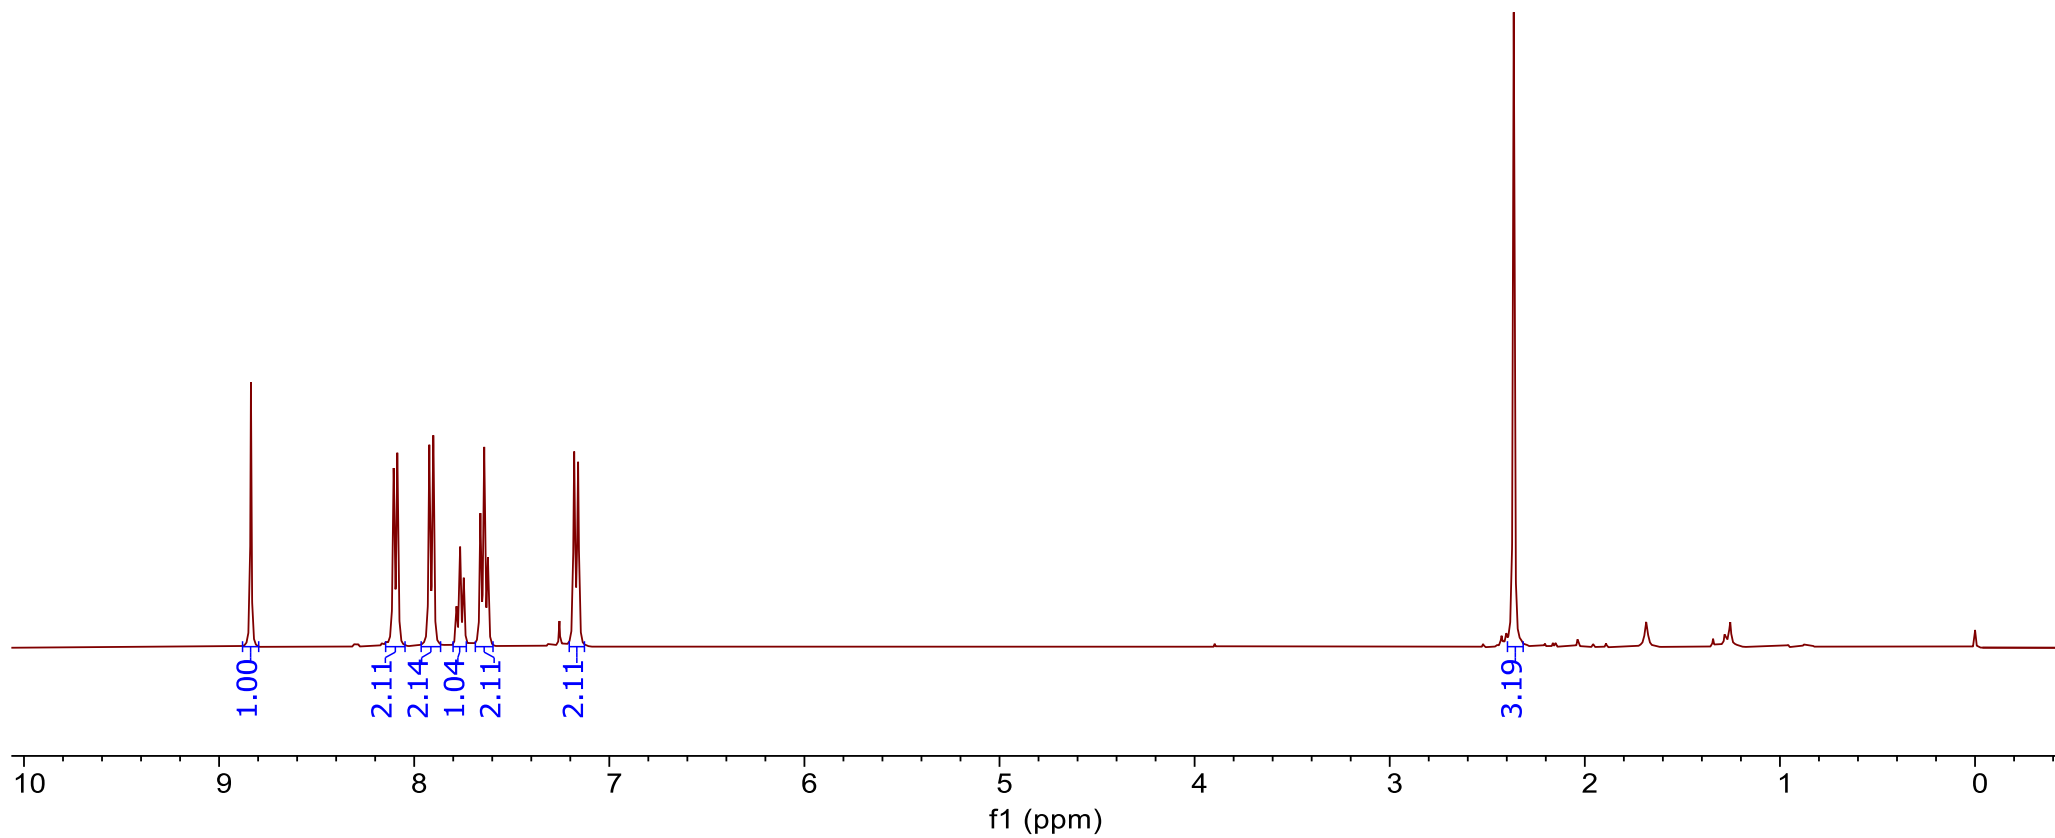

<sup>1</sup>H NMR Spectrum of 13e

CDCl<sub>3</sub>, 100.62 MHz

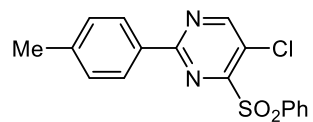

13e

162.13  
161.66  
160.46  
142.67  
136.68  
134.65  
132.25  
130.22  
129.62  
129.10  
128.46  
124.47

21.66  
21.63

21.66  
21.63

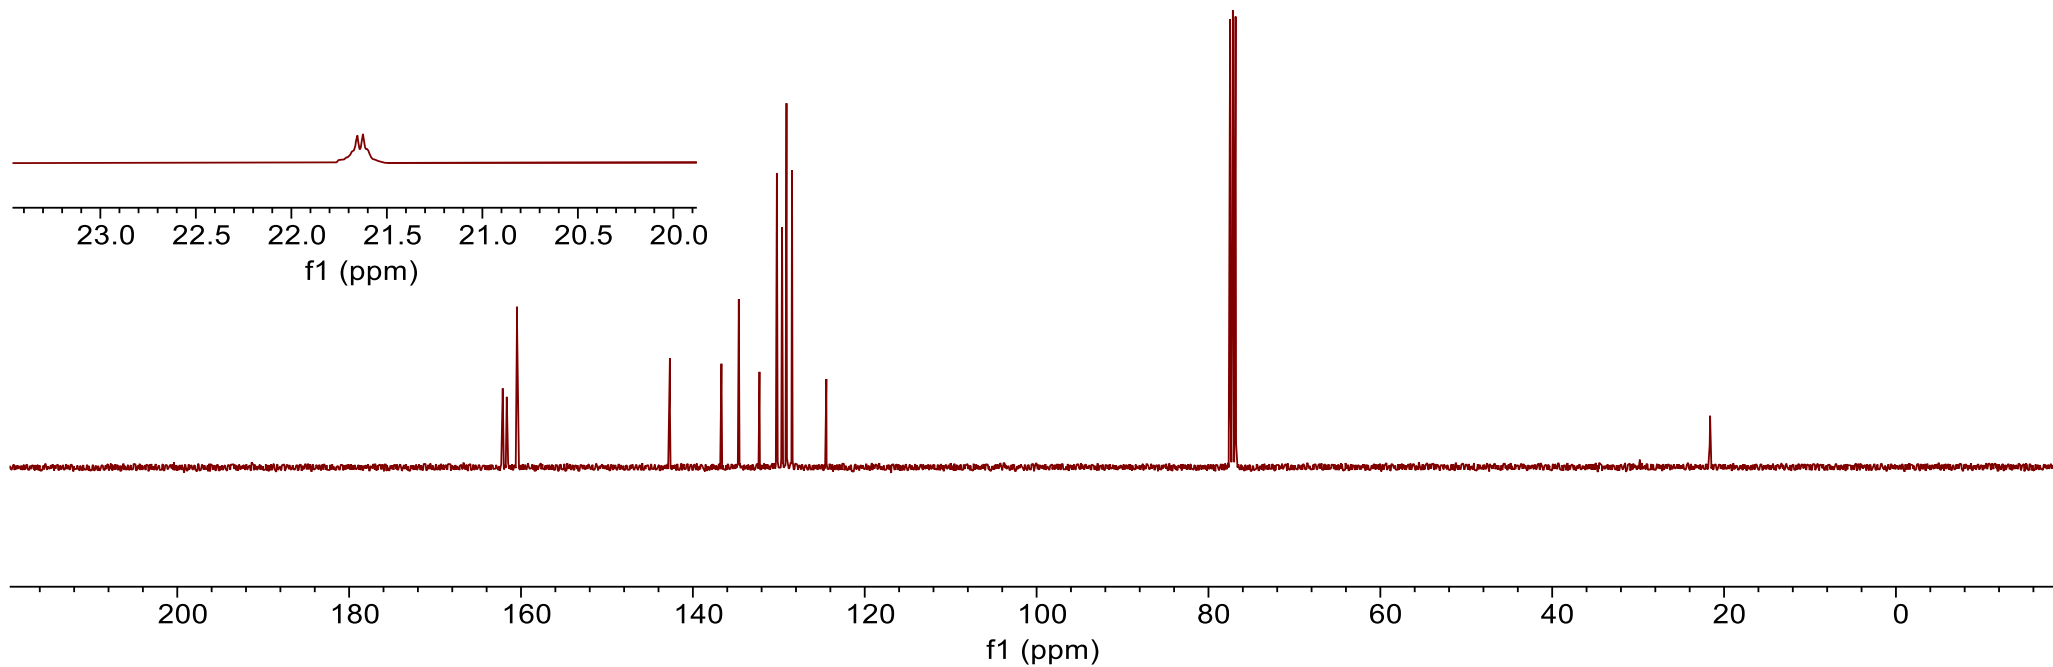

<sup>13</sup>C NMR Spectrum of 13e

CDCl<sub>3</sub>, 400.13 MHz

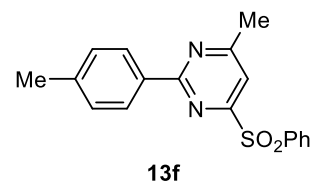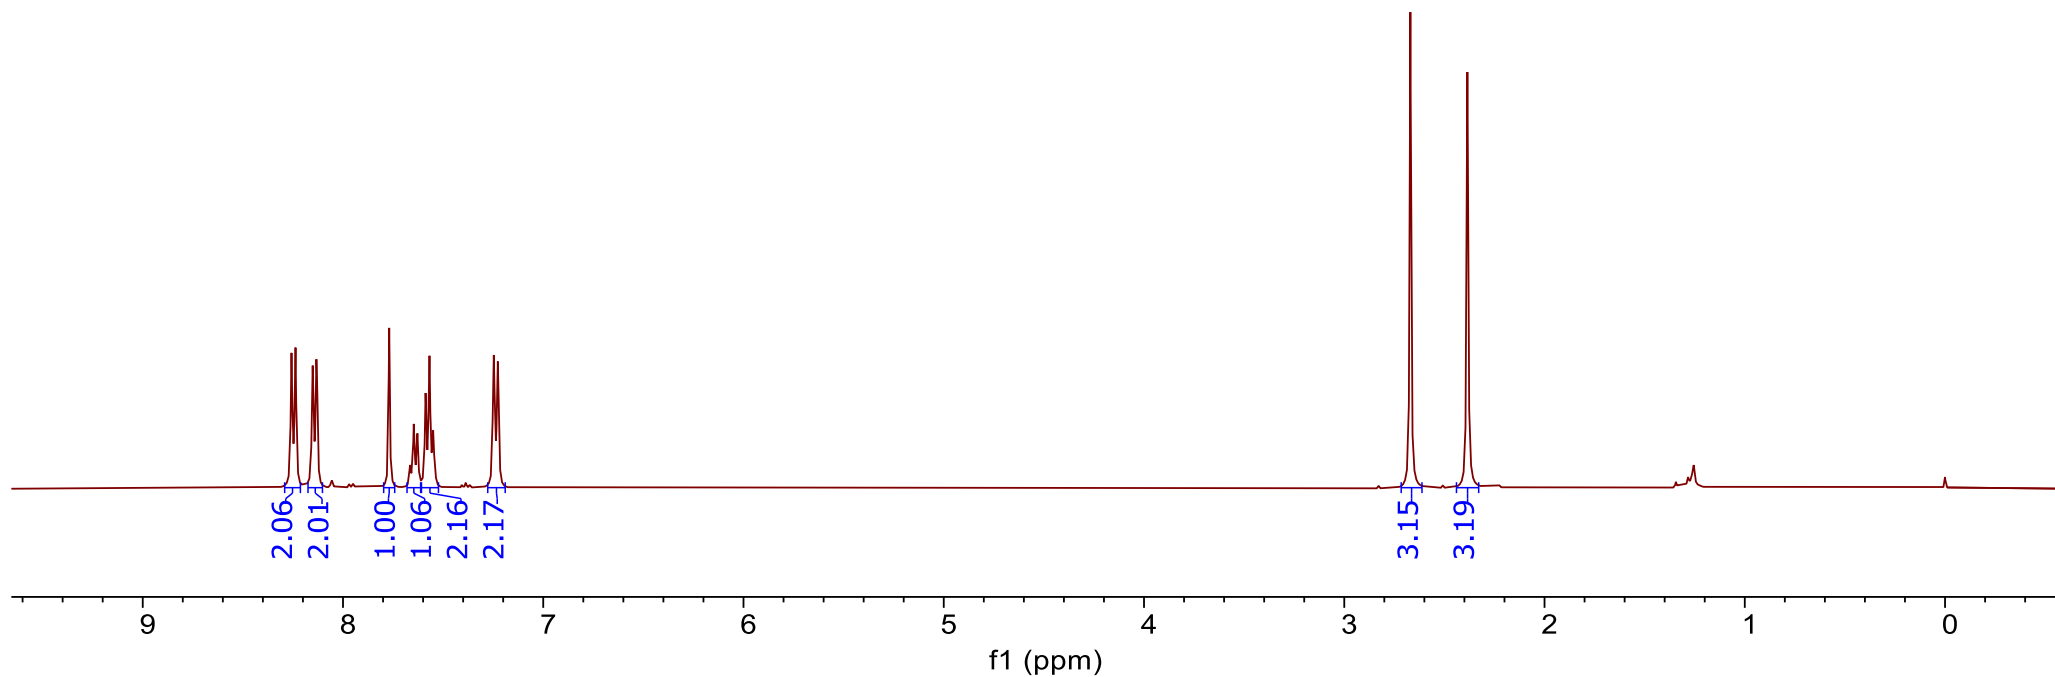

<sup>1</sup>H NMR Spectrum of **13f**

— 0.00

CDCl<sub>3</sub>, 100.62 MHz

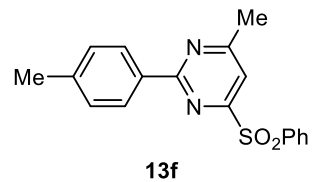

171.08  
166.63  
165.23

142.14  
137.72  
134.38  
133.46  
129.58  
129.45  
129.22  
128.68  
113.96

25.05  
25.02  
21.65  
21.62

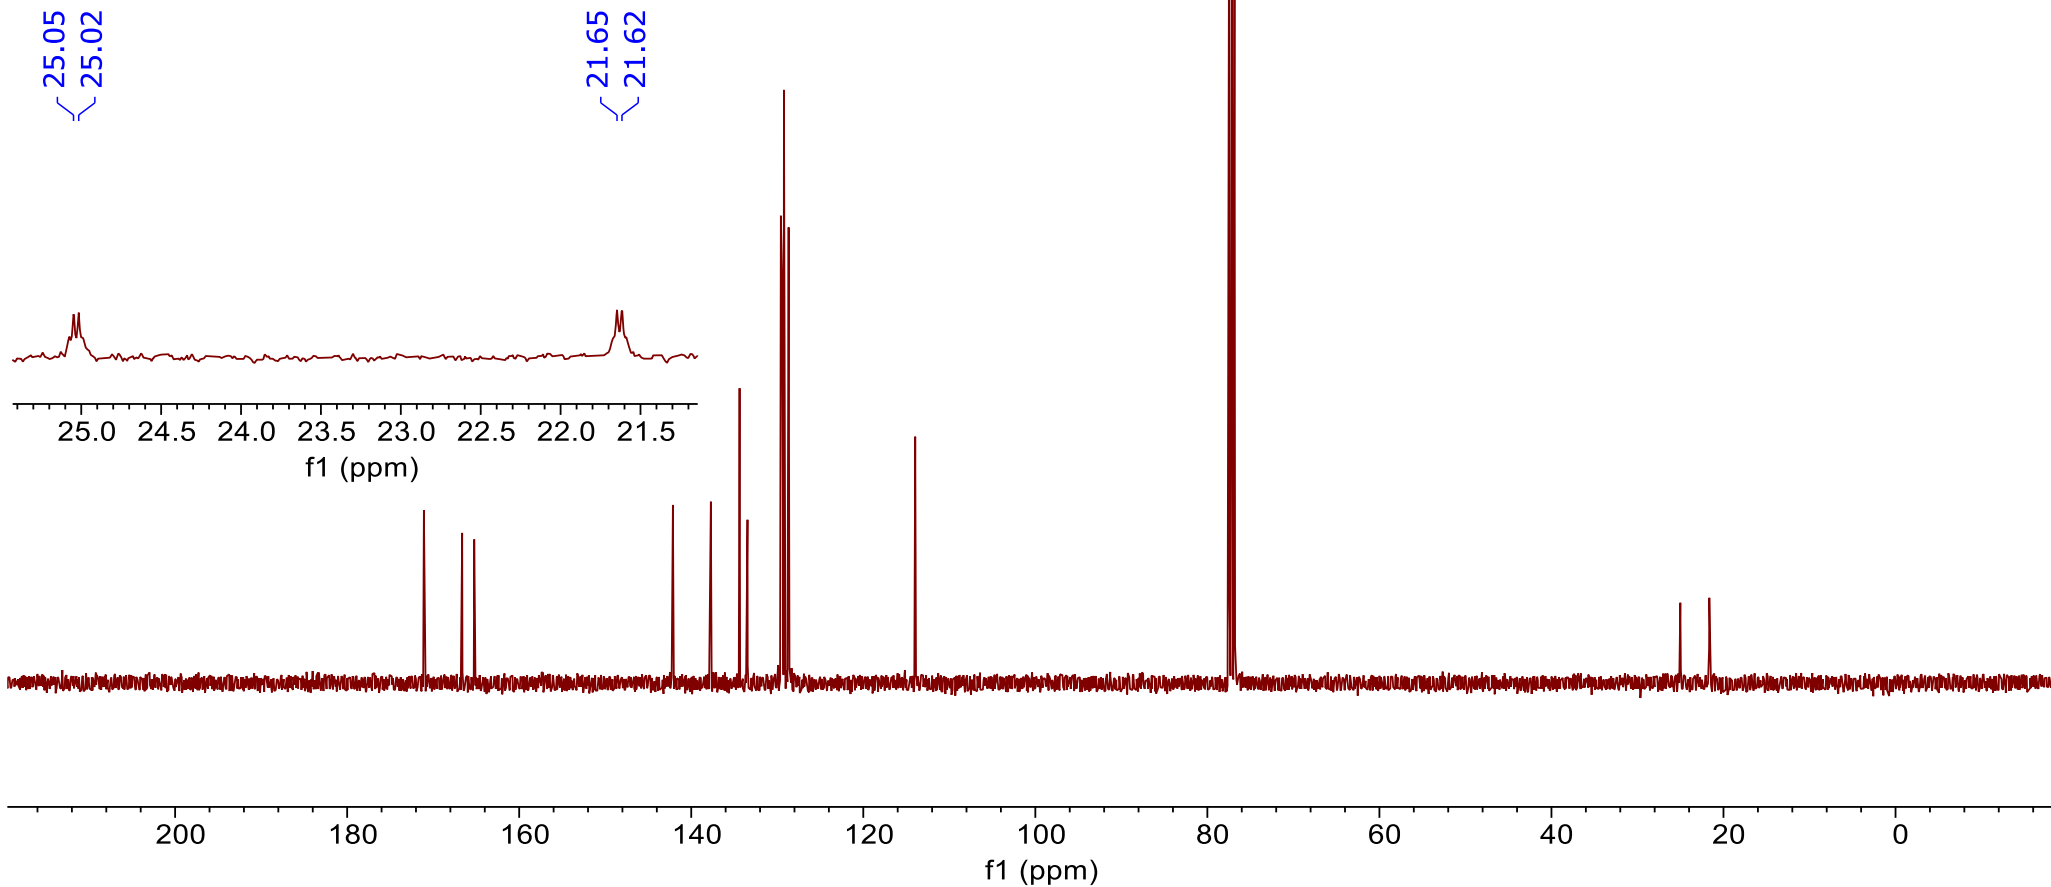

<sup>13</sup>C NMR Spectrum of **13f**



CDCl<sub>3</sub>, 400.13 MHz

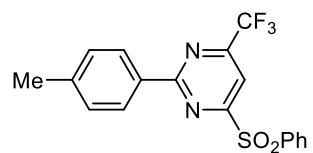

13g

0.00

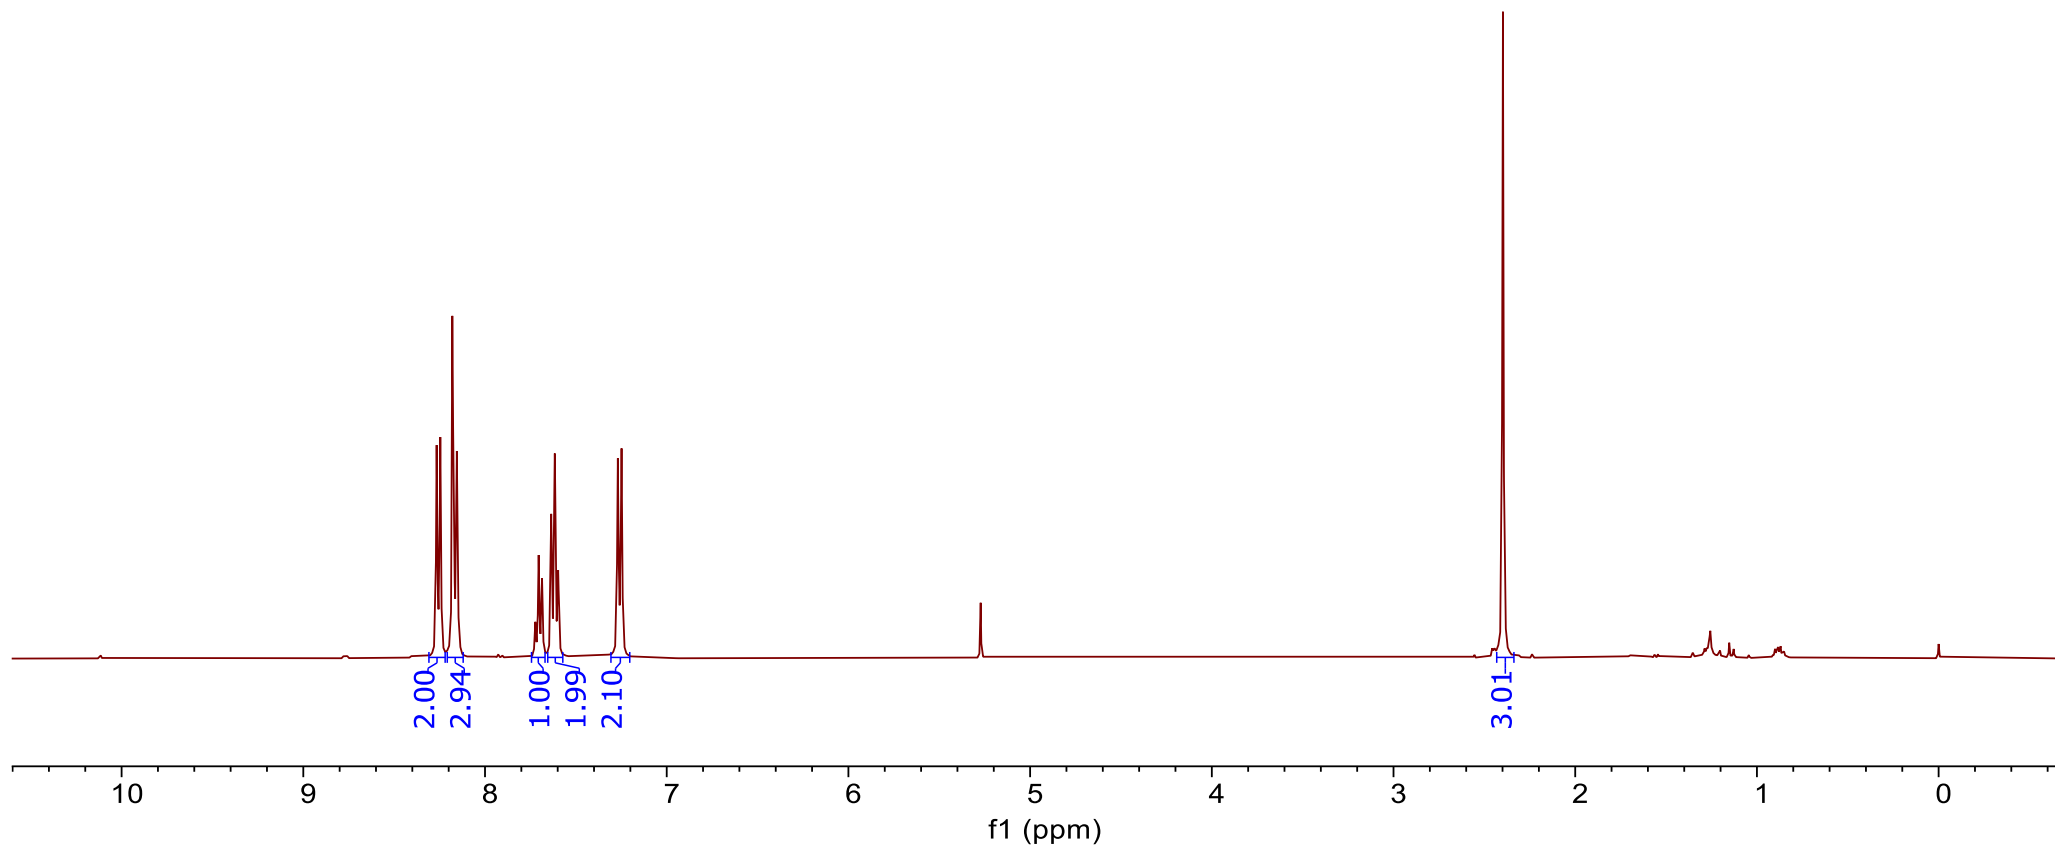

<sup>1</sup>H NMR Spectrum of 13g

CDCl<sub>3</sub>, 100.62 MHz

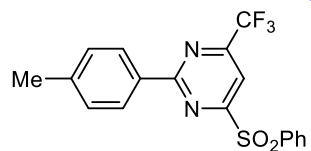

**13g**

21.74  
21.71

169.58  
166.59  
159.60  
159.23  
158.86  
158.49  
143.75  
136.72  
135.01  
131.91  
129.86  
129.79  
129.52  
129.11  
124.22  
122.62  
119.69  
116.00  
110.31  
110.28

21.74  
21.71

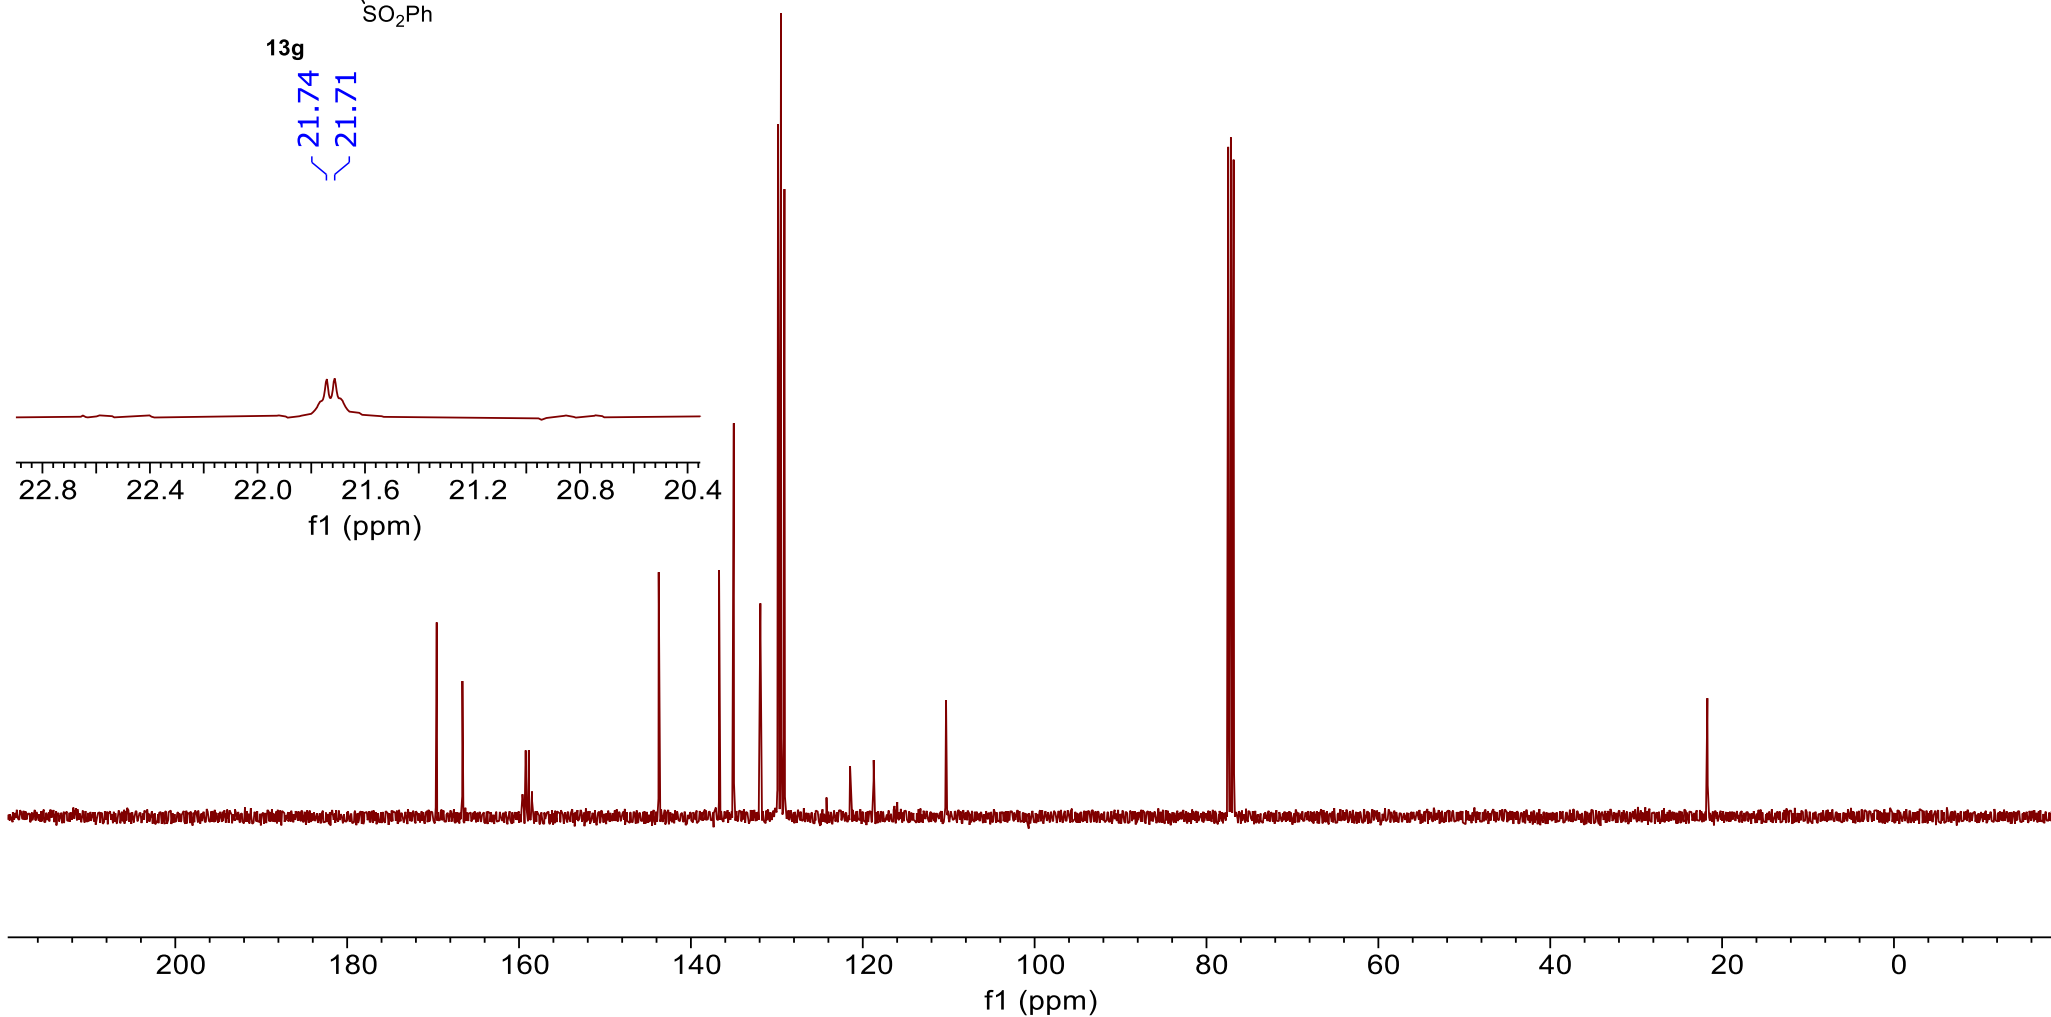

<sup>13</sup>C NMR Spectrum of **13g**

CDCl<sub>3</sub>, 376.46 MHz

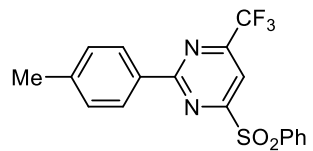

**13g**

— -69.85

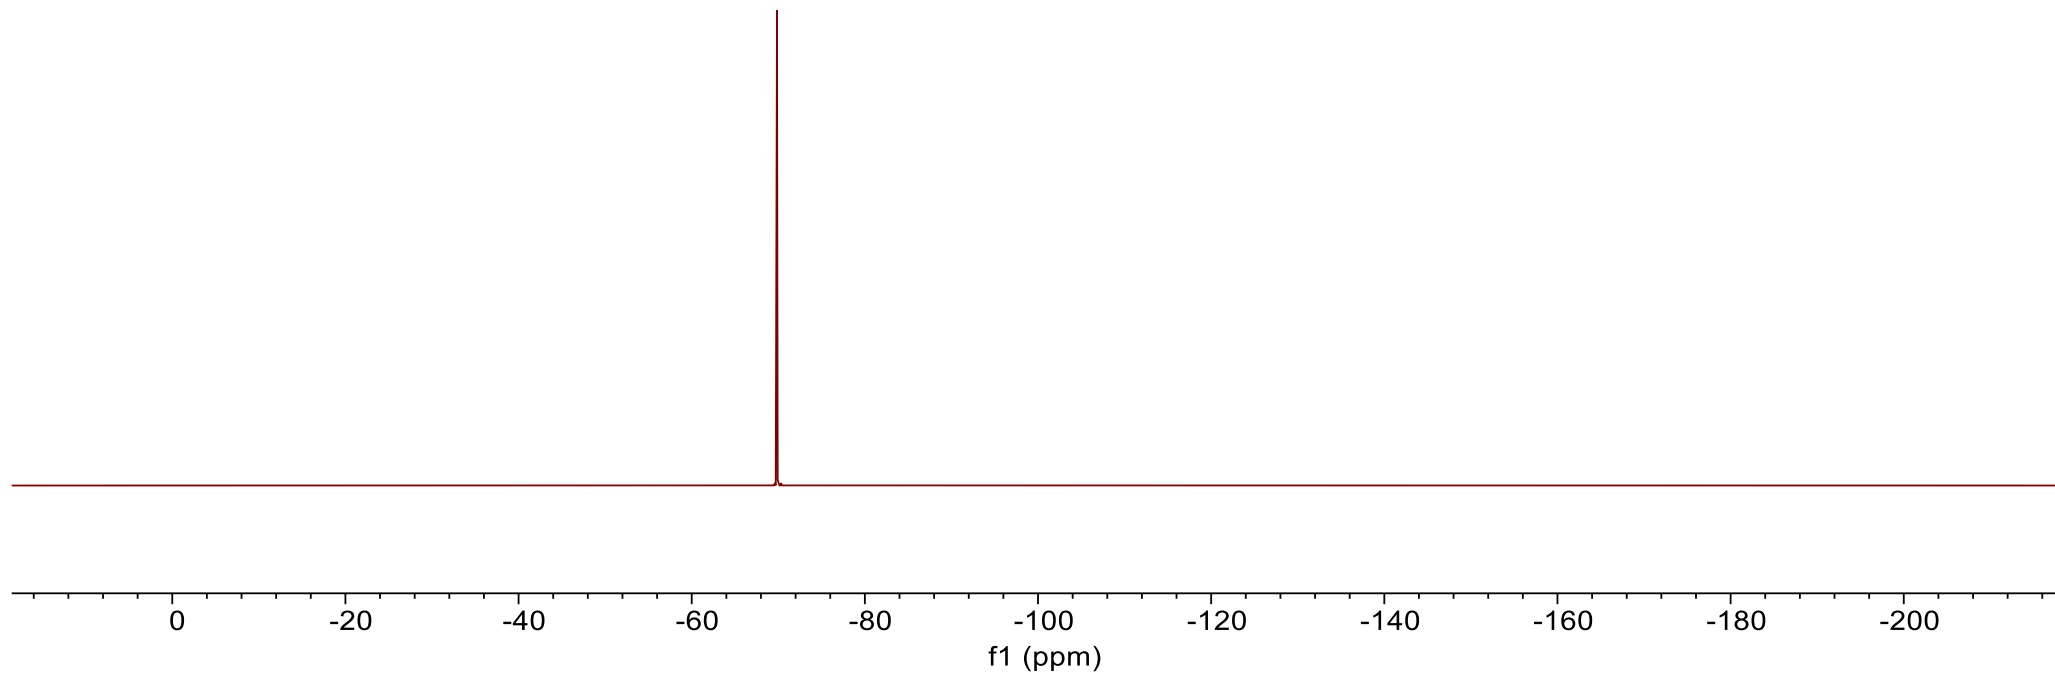

<sup>19</sup>F NMR Spectrum of **13g**

DMSO, 400.13 MHz

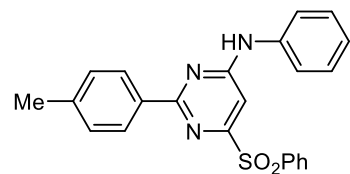

**13h**

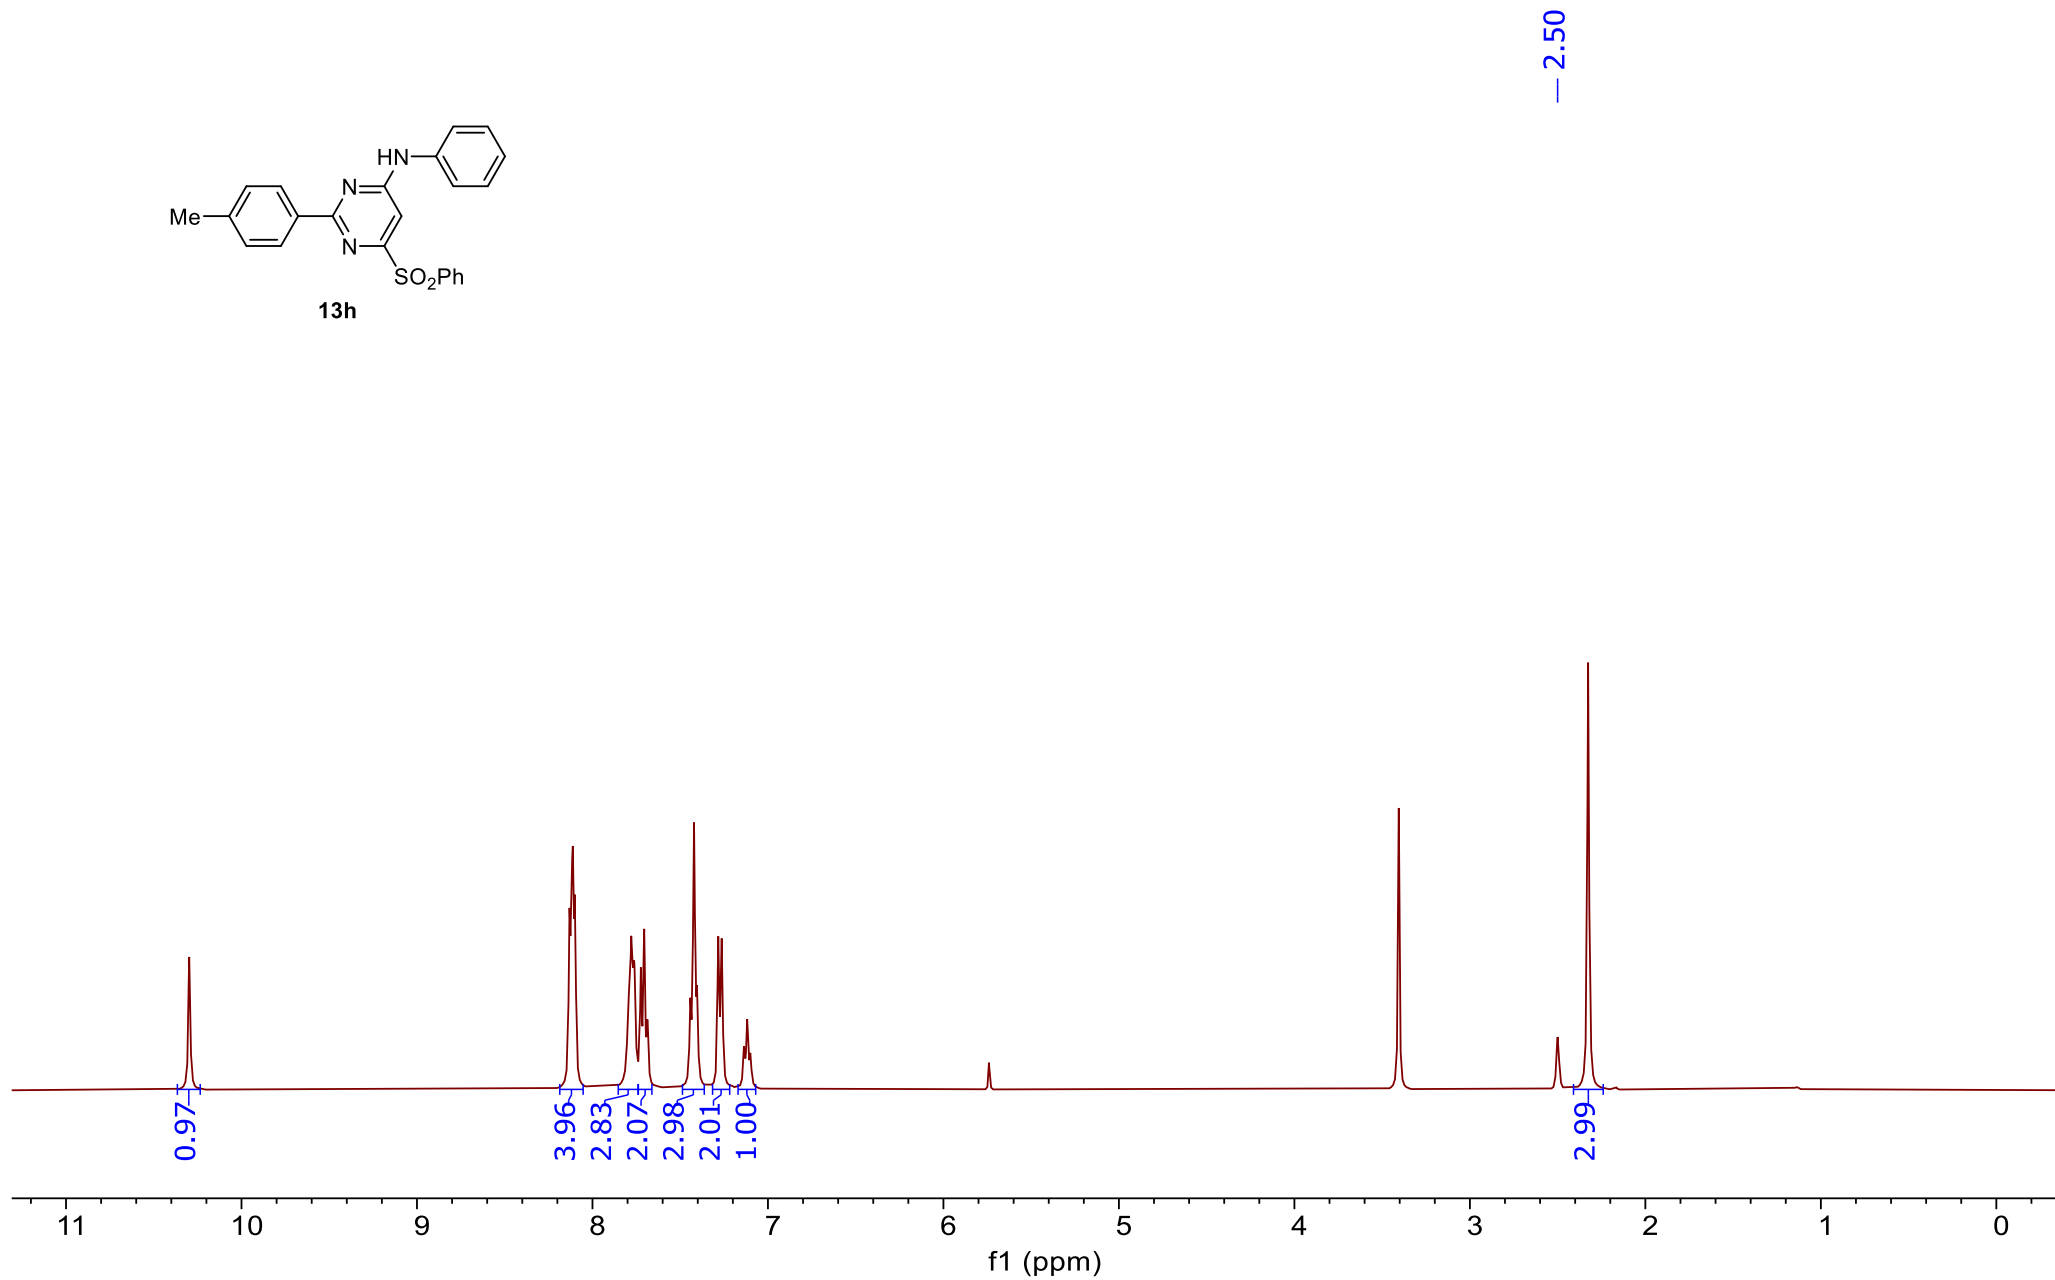

$^1\text{H}$  NMR Spectrum of **13h**

DMSO, 100.62 MHz

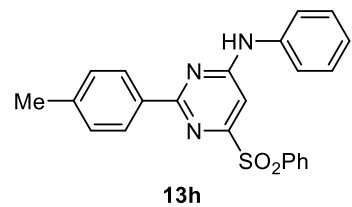

164.24  
161.34  
141.42  
138.85  
137.51  
134.57  
133.66  
129.56  
129.30  
128.98  
128.89  
127.90  
123.55  
120.36

21.06  
21.00

21.06  
21.00

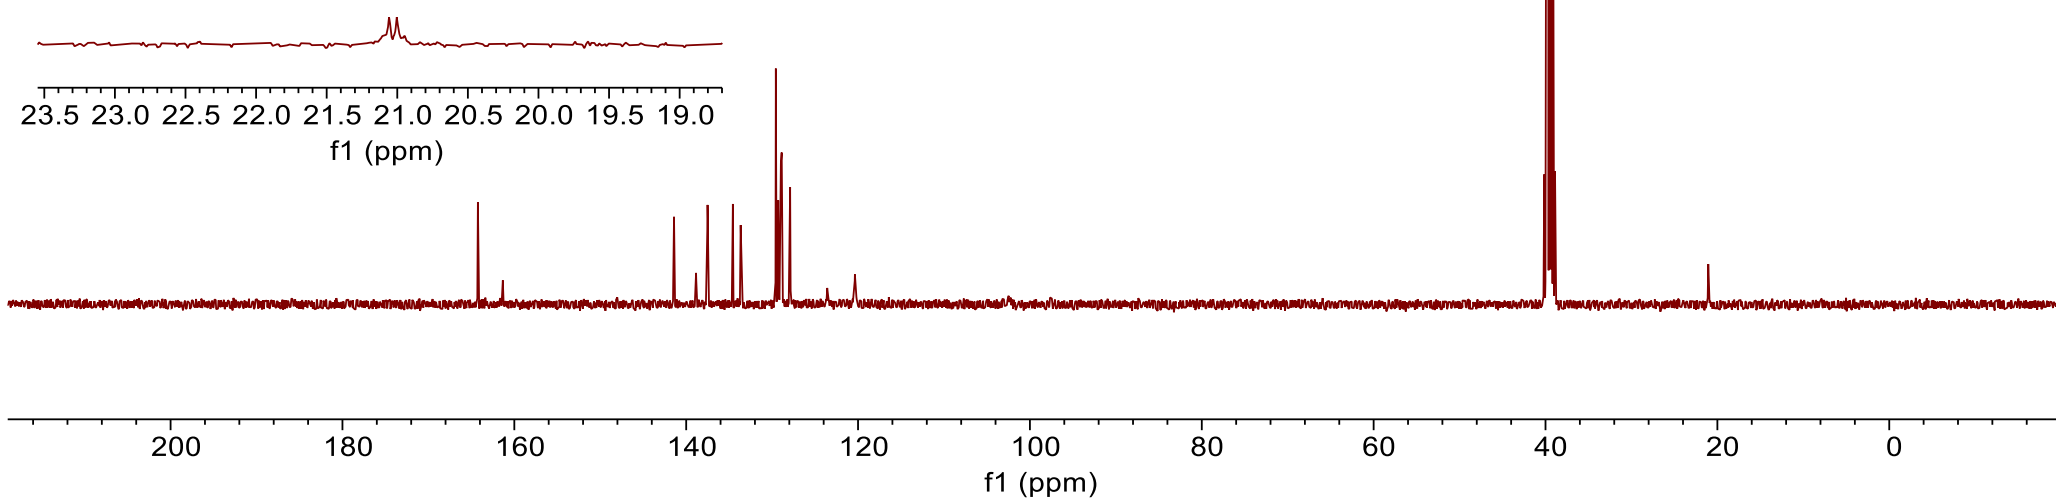

<sup>13</sup>C NMR Spectrum of **13h**

CDCl<sub>3</sub>, 400.13 MHz

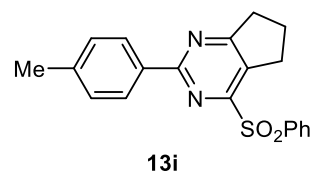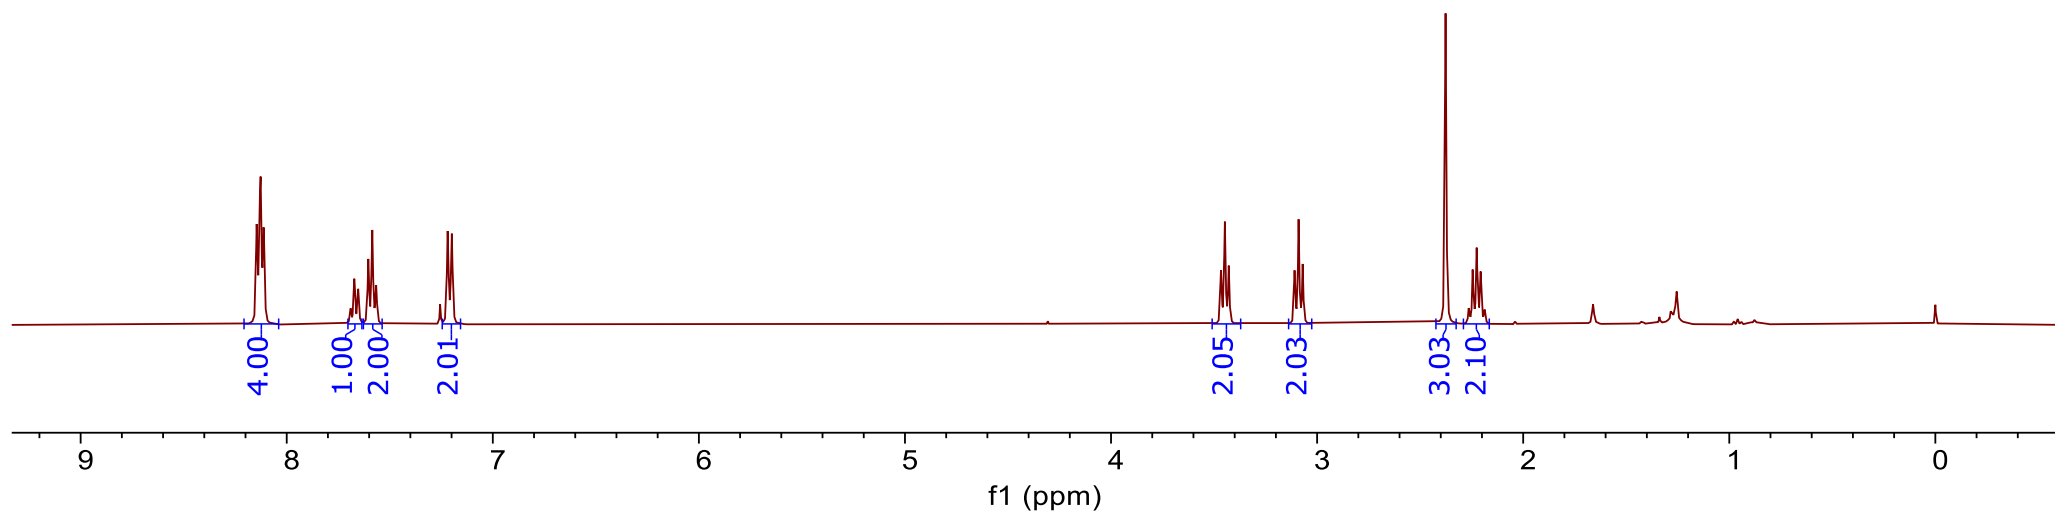

<sup>1</sup>H NMR Spectrum of **13i**

0.00

CDCl<sub>3</sub>, 100.62 MHz

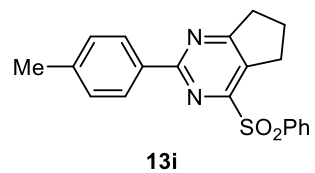

180.69

163.68

160.61

141.58

138.10

134.26

133.75

129.62

129.42

129.07

128.37

34.40

29.27

22.35

21.62

21.58

22.35

21.62

21.58

23.6 23.2 22.8 22.4 22.0 21.6 21.2 20.8

f1 (ppm)

f1 (ppm)

<sup>13</sup>C NMR Spectrum of **13i**

CDCl<sub>3</sub>, 400.13 MHz

0.00

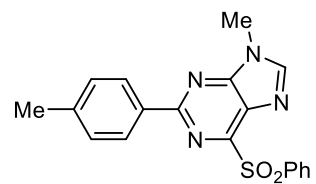

**13j**

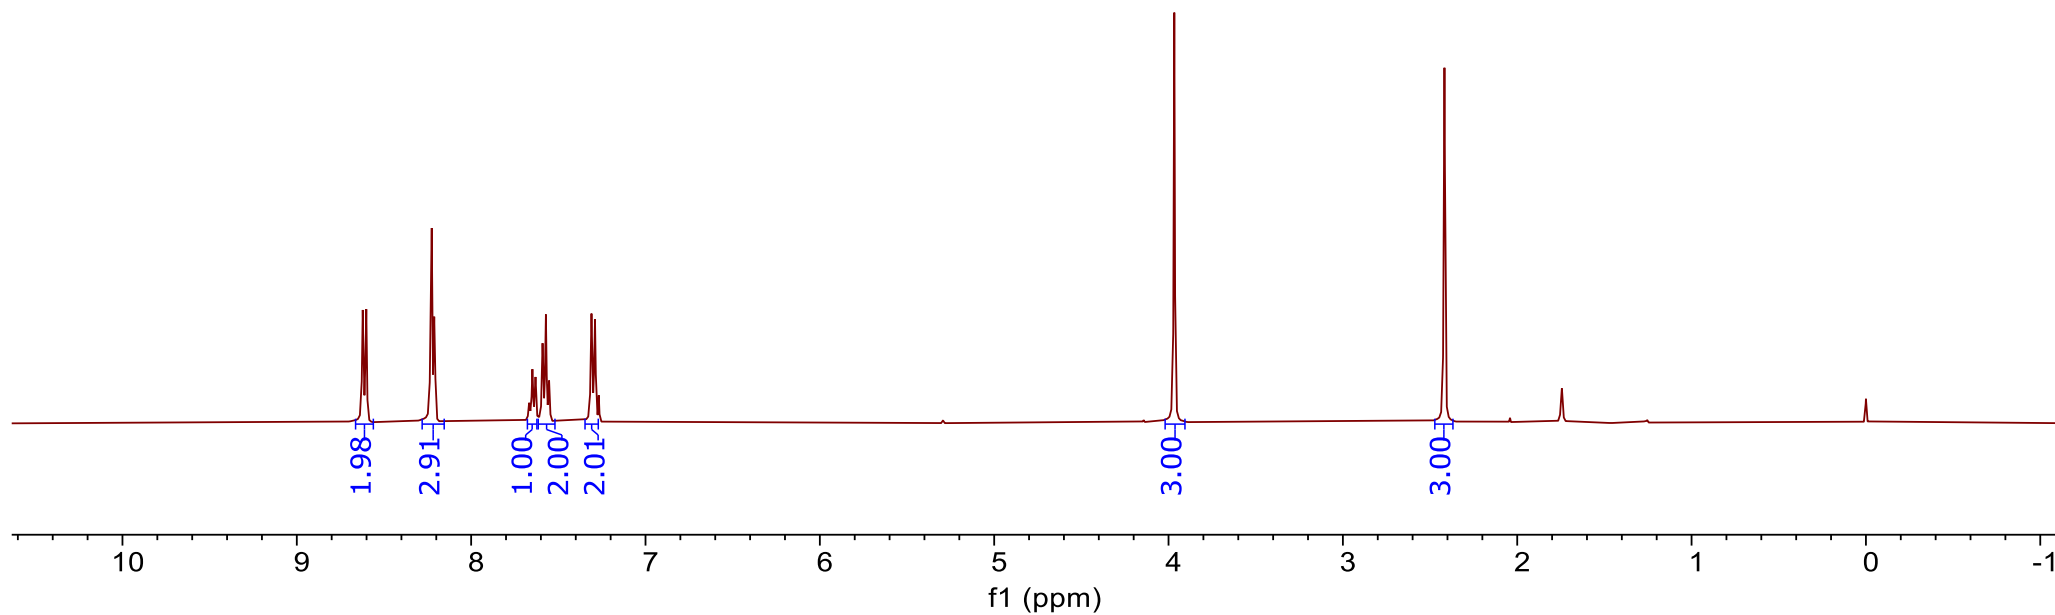

<sup>1</sup>H NMR Spectrum of **13j**



CDCl<sub>3</sub>, 100.61 MHz

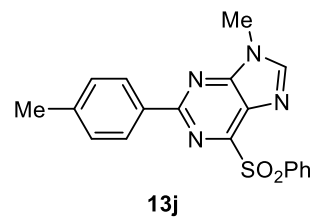

159.72  
155.23  
153.12  
147.38  
142.75  
138.67  
133.92  
131.71  
131.40  
130.25  
129.73  
129.58  
128.96

— 30.52

— 21.79

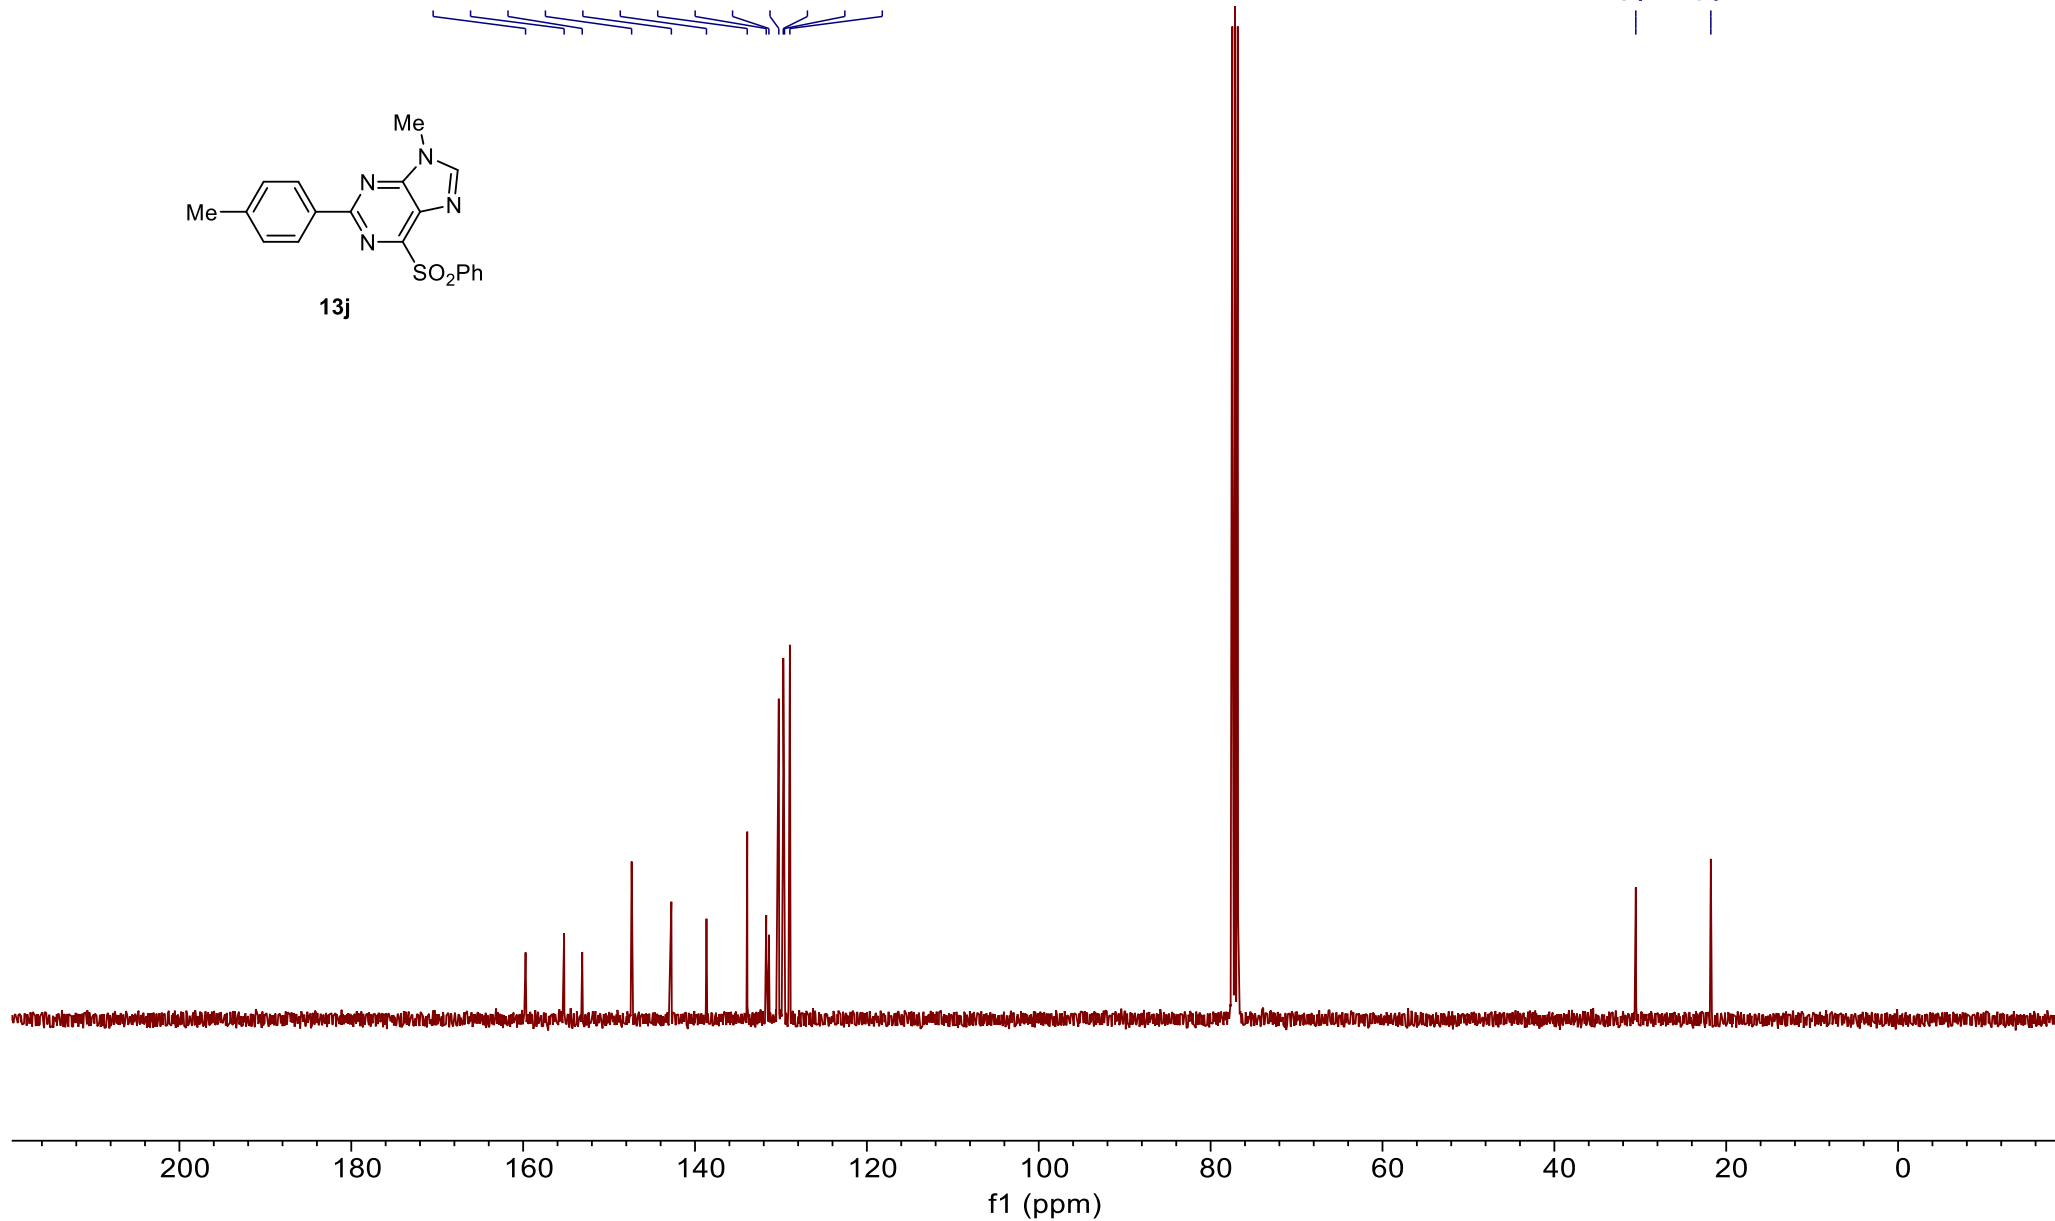

<sup>13</sup>C NMR Spectrum of **13j**

CDCl<sub>3</sub>, 400.13 MHz

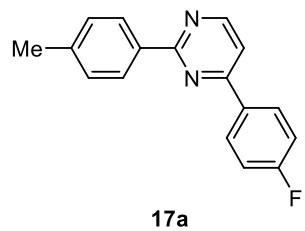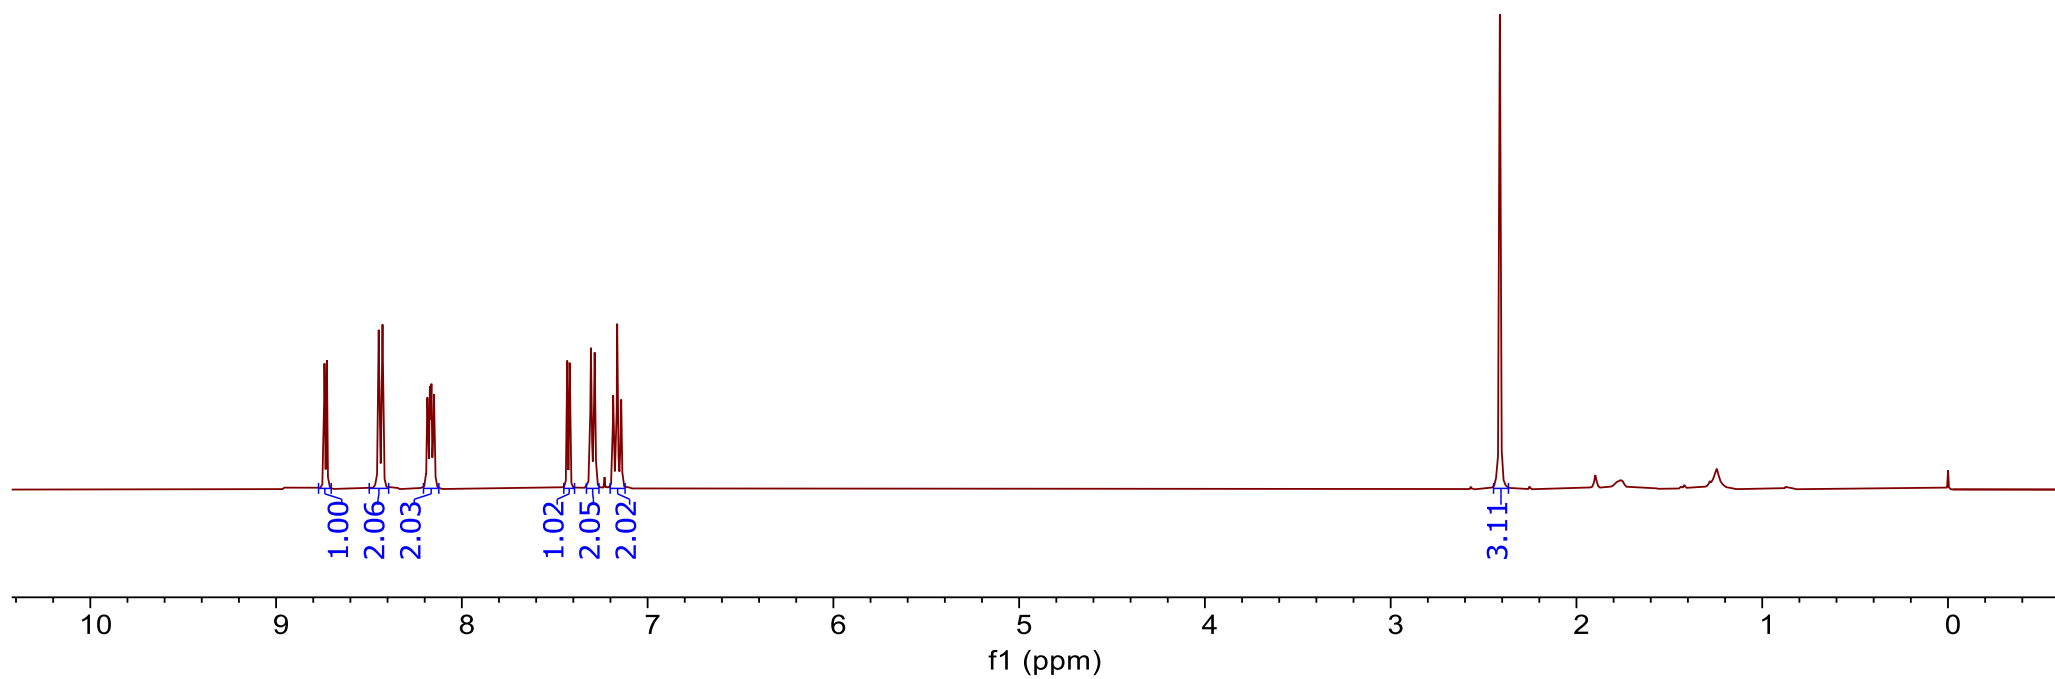

00:00

CDCl<sub>3</sub>, 100.62 MHz

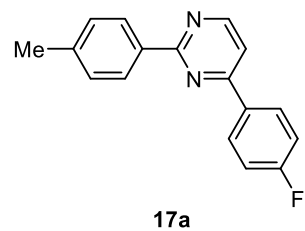

165.96  
164.70  
163.47  
162.66  
157.89  
141.12  
135.13  
133.23  
133.20  
129.39  
129.33  
129.25  
128.31  
116.09  
115.88  
113.88

21.60  
21.56

21.60  
21.56

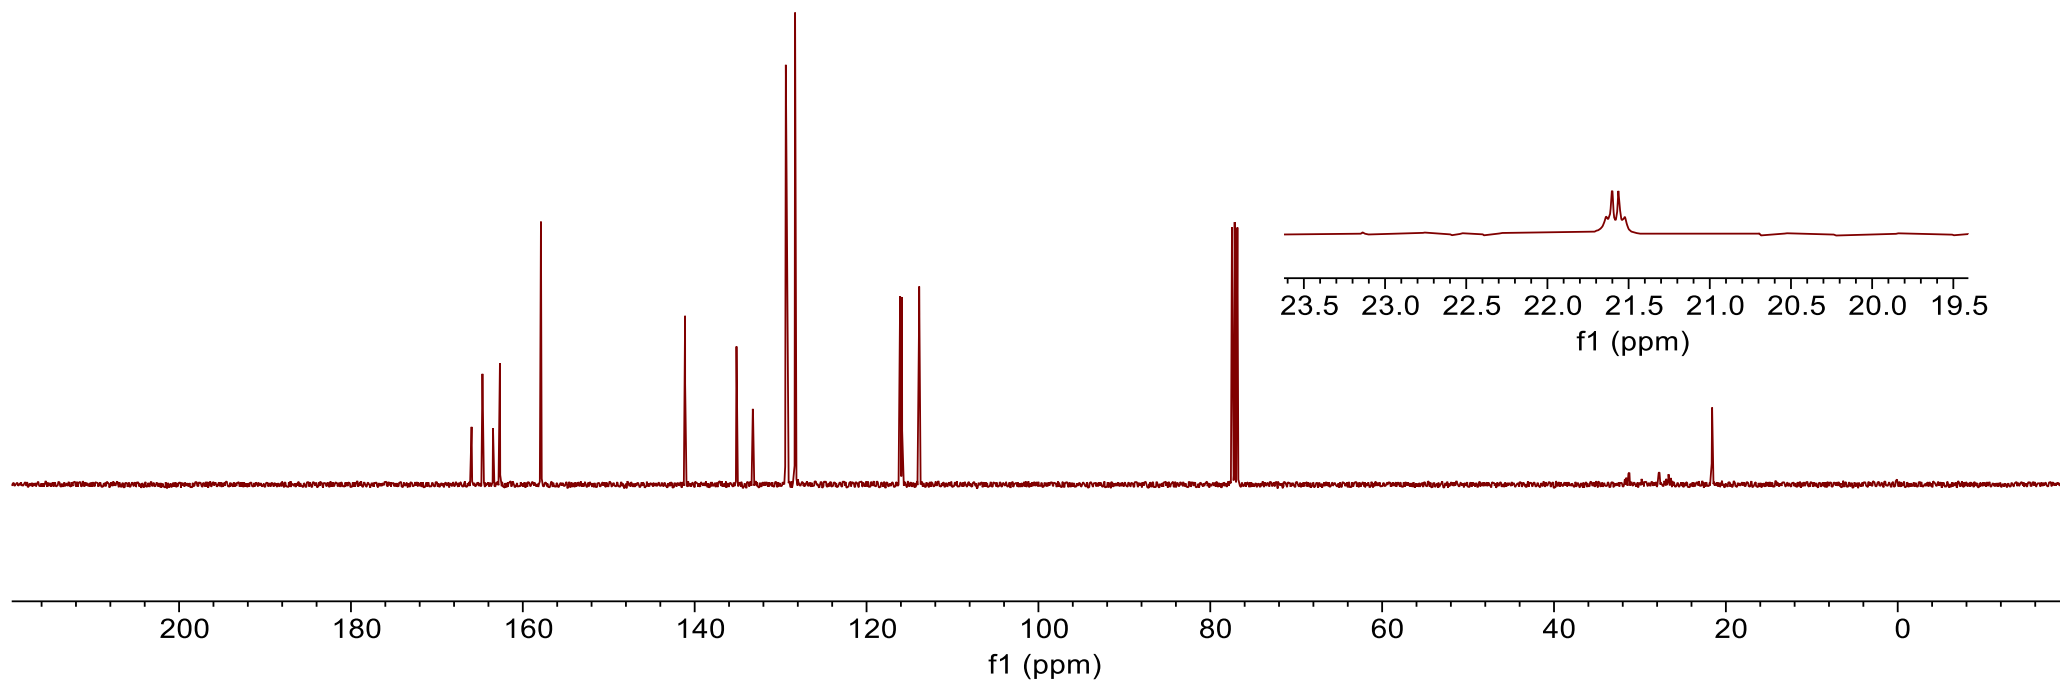

<sup>13</sup>C NMR Spectrum of 17a

CDCl<sub>3</sub>, 376.46 MHz

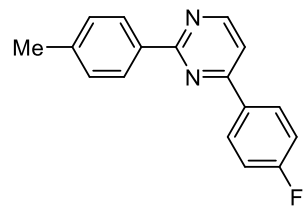

**17a**

-109.59

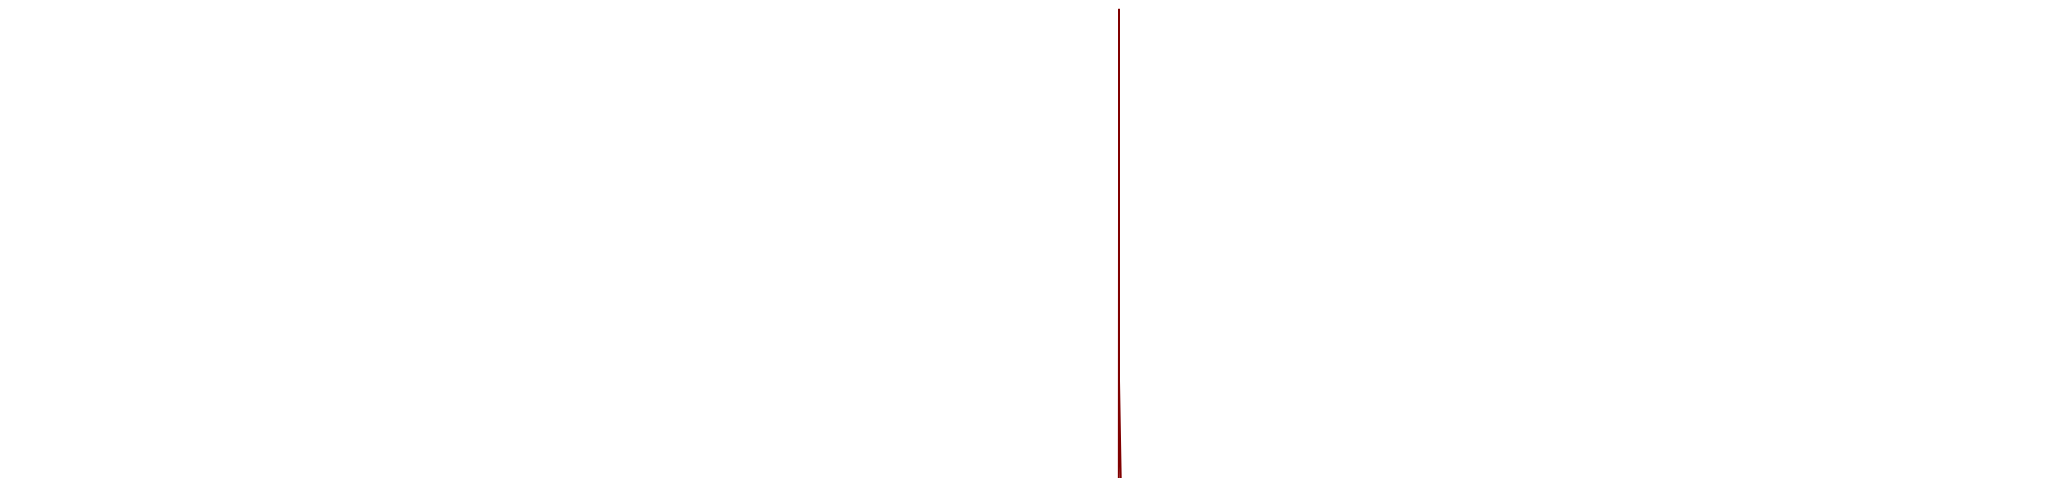

<sup>19</sup>F NMR Spectrum of **17a**

CDCl<sub>3</sub>, 400.13 MHz

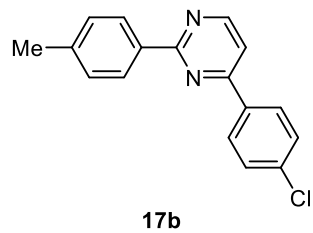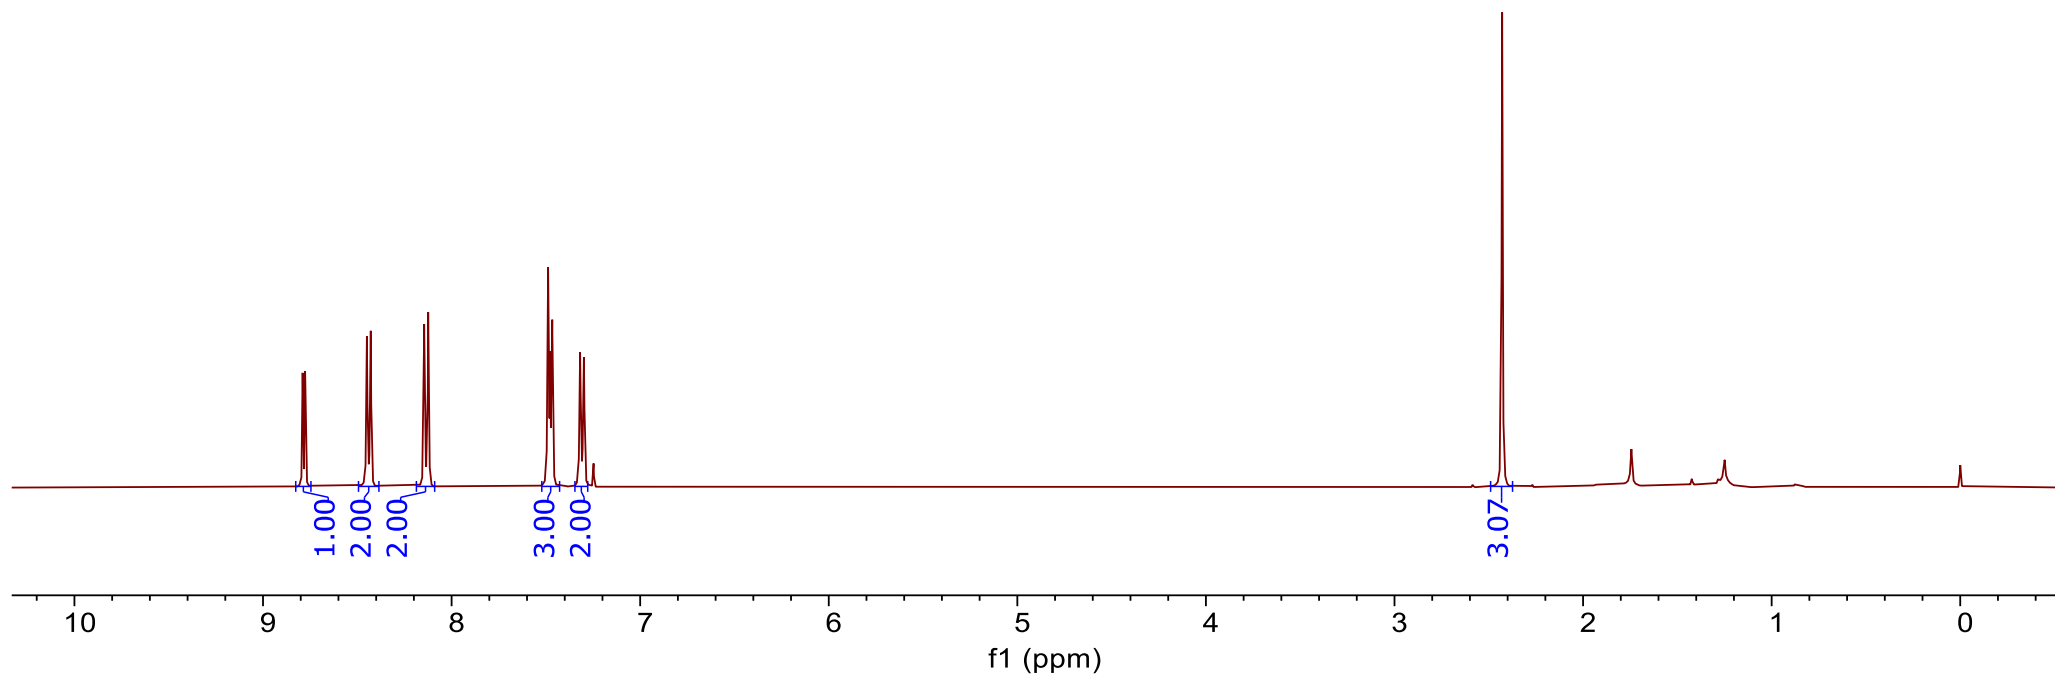

<sup>1</sup>H NMR Spectrum of **17b**

CDCl<sub>3</sub>, 100.62 MHz

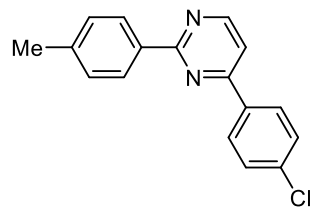

17b

164.84  
162.65  
158.07  
141.22  
137.22  
135.58  
135.09  
129.45  
129.26  
128.58  
128.36  
114.04

21.66  
21.62

21.66  
21.62

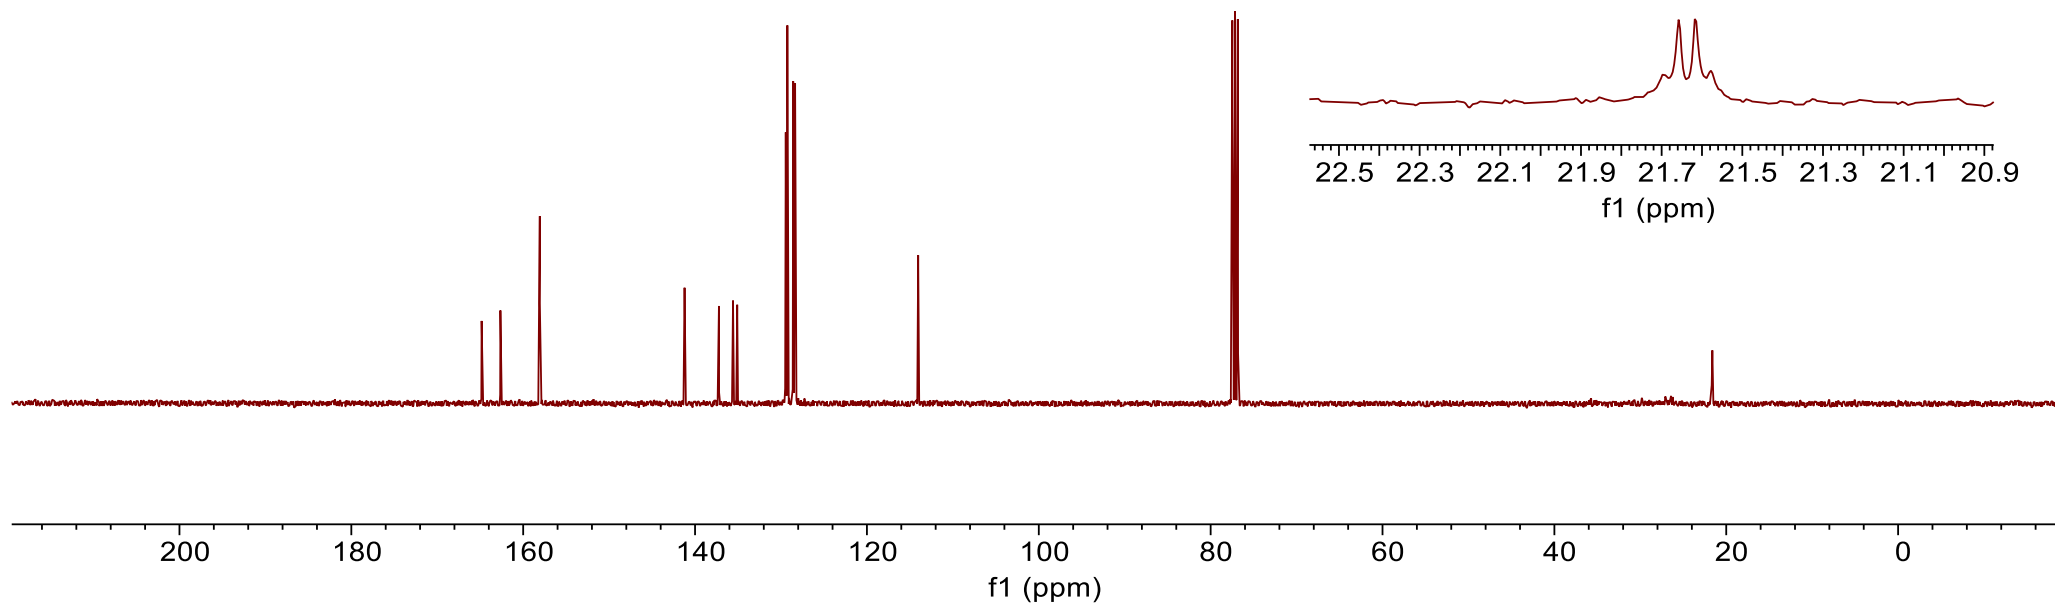

<sup>13</sup>C NMR Spectrum of 17b

CDCl<sub>3</sub>, 400.13 MHz

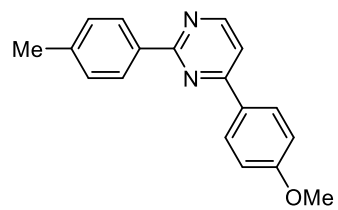

17c

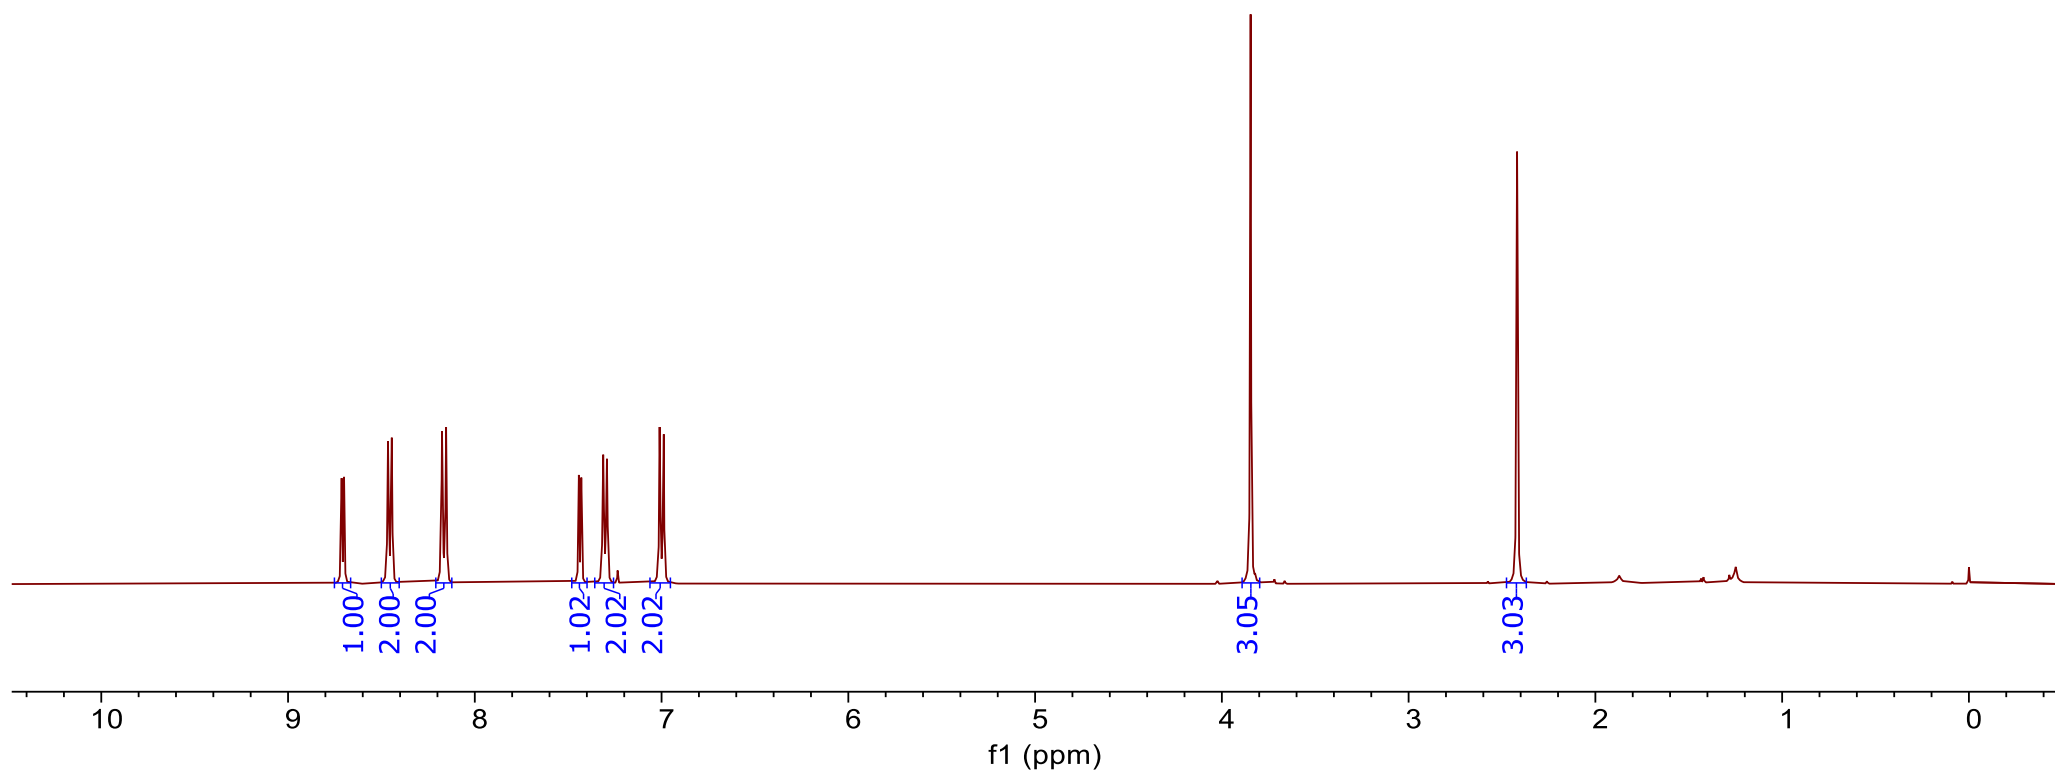

<sup>1</sup>H NMR Spectrum of 17c

CDCl<sub>3</sub>, 100.62 MHz

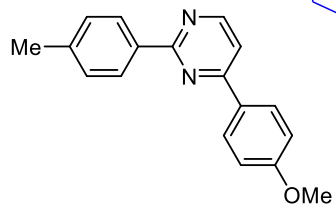

17c

164.55  
163.32  
162.09  
157.56  
140.88  
135.43  
129.54  
129.35  
128.80  
128.29  
114.32  
113.45

21.62  
21.57

55.51  
55.45

21.62  
21.57

55.51  
55.45

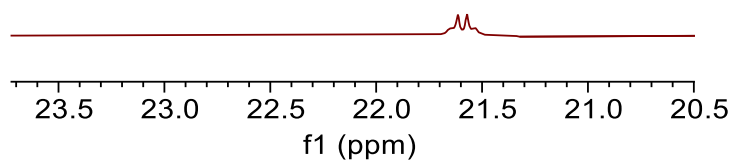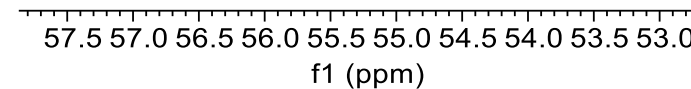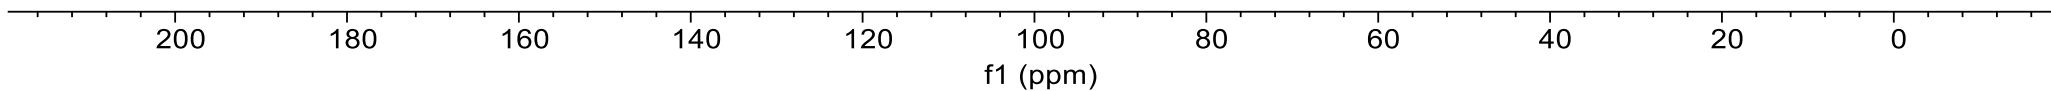

<sup>13</sup>C NMR Spectrum of 17c



CDCl<sub>3</sub>, 400.13 MHz

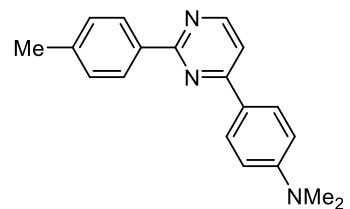

17d

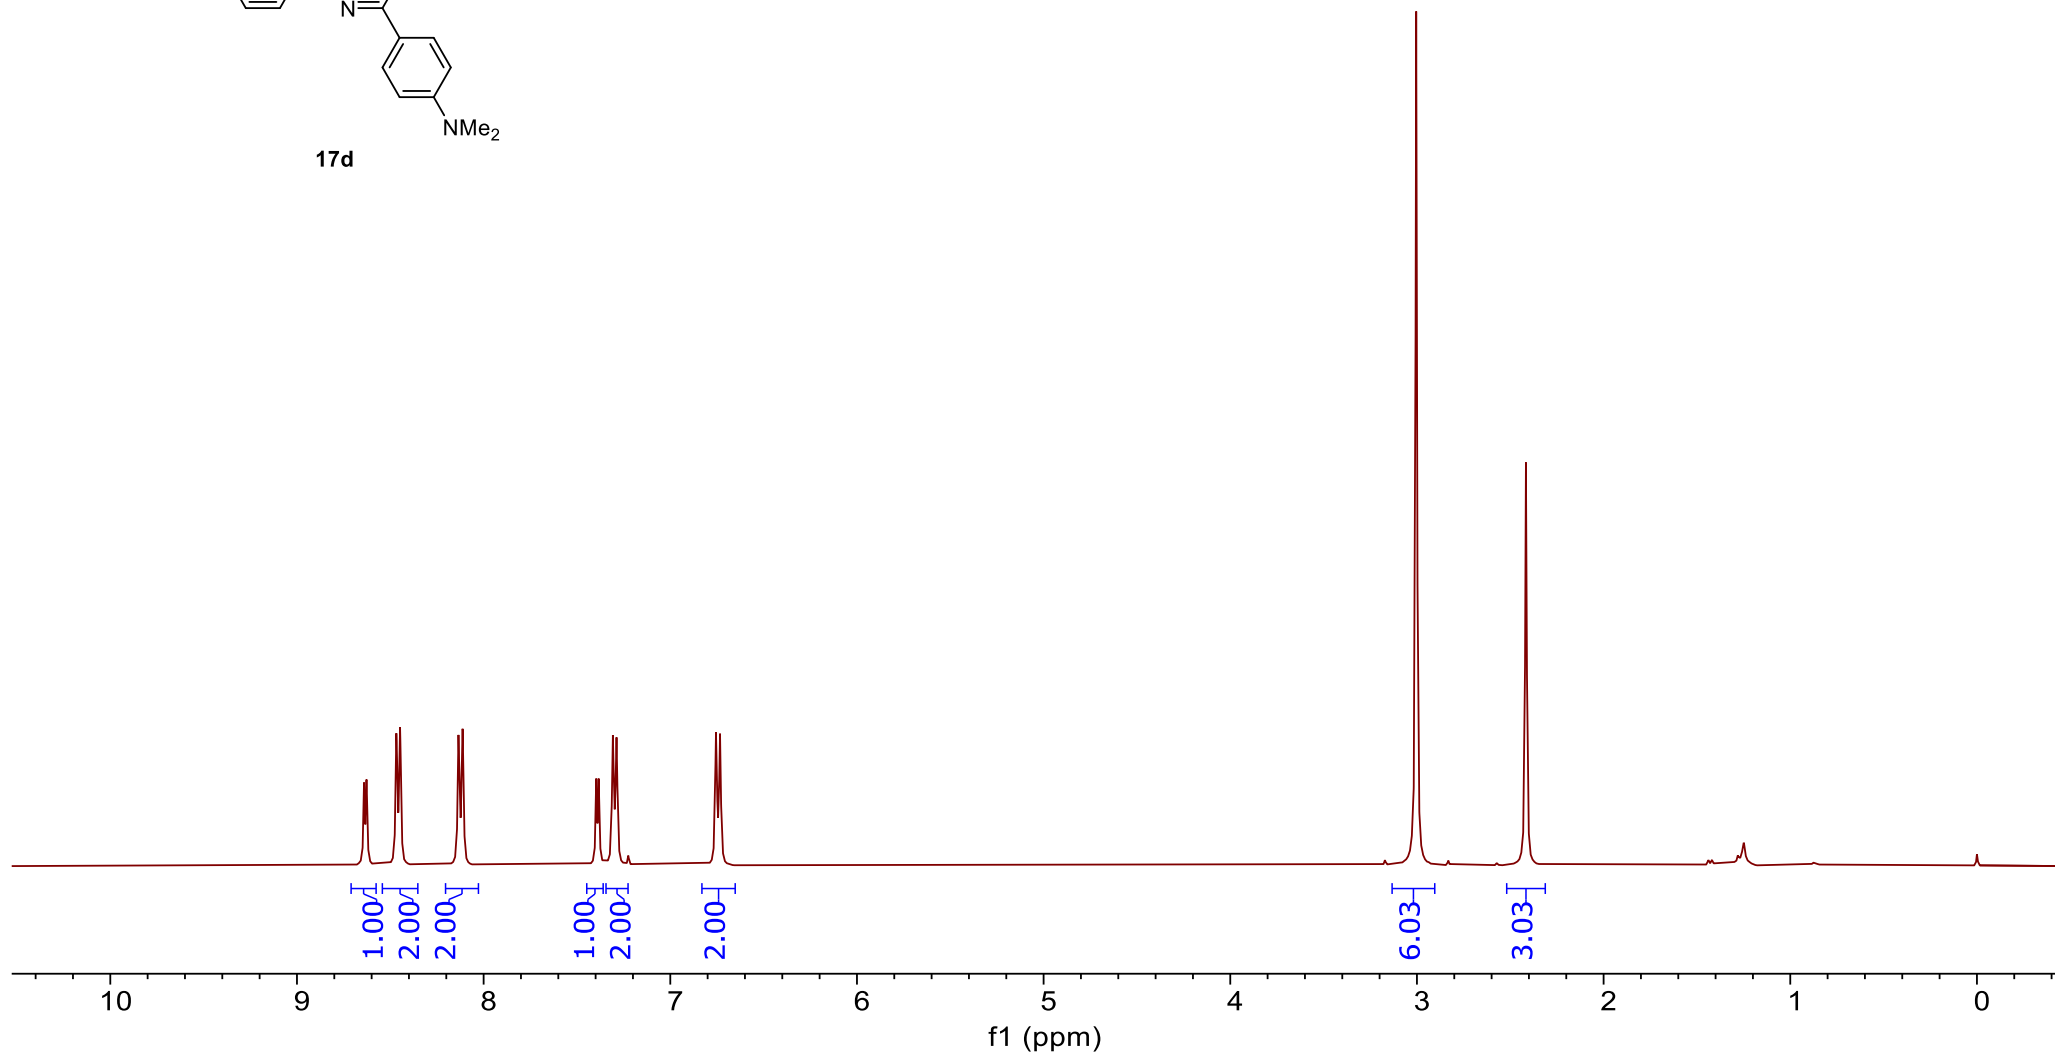

<sup>1</sup>H NMR Spectrum of 17d

— -0.00

CDCl<sub>3</sub>, 100.62 MHz

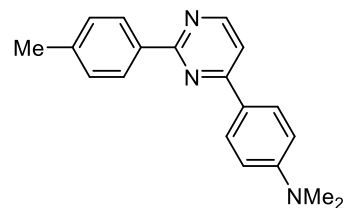

17d

164.31  
163.67  
157.04  
152.37  
140.58  
135.76  
129.27  
128.44  
128.25  
124.22  
112.66  
111.85

40.23  
40.21

21.60  
21.56

40.23  
40.21

21.60  
21.56

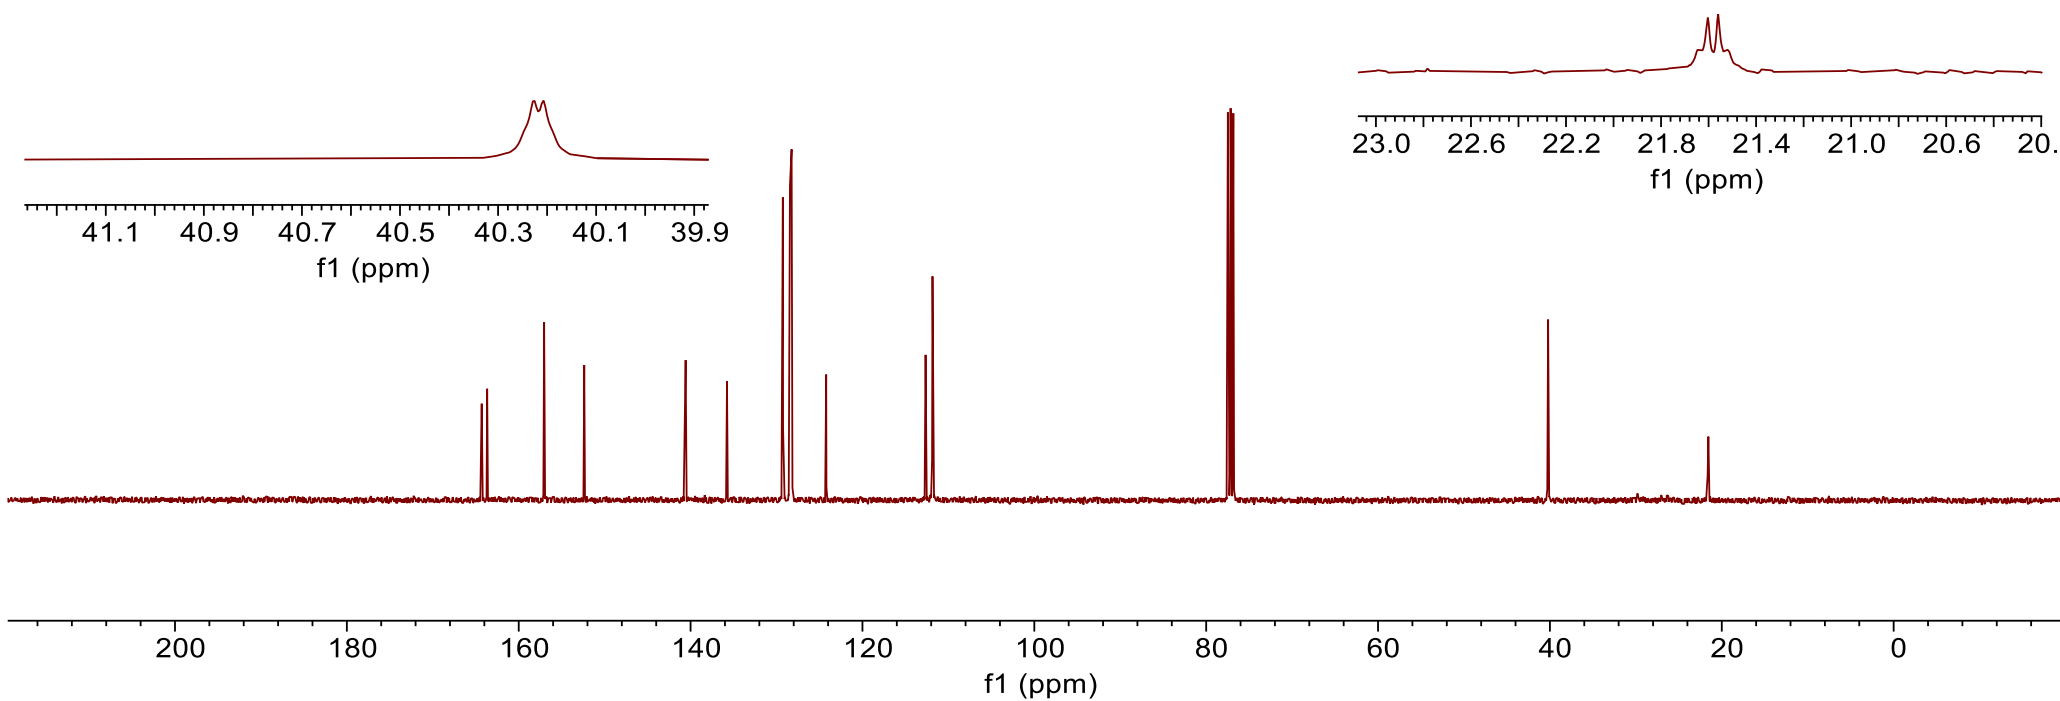

<sup>13</sup>C NMR Spectrum of 17d

CDCl<sub>3</sub>, 400.13 MHz

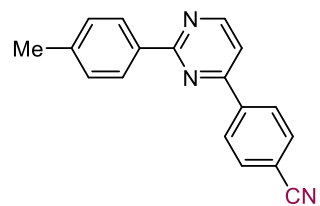

17e

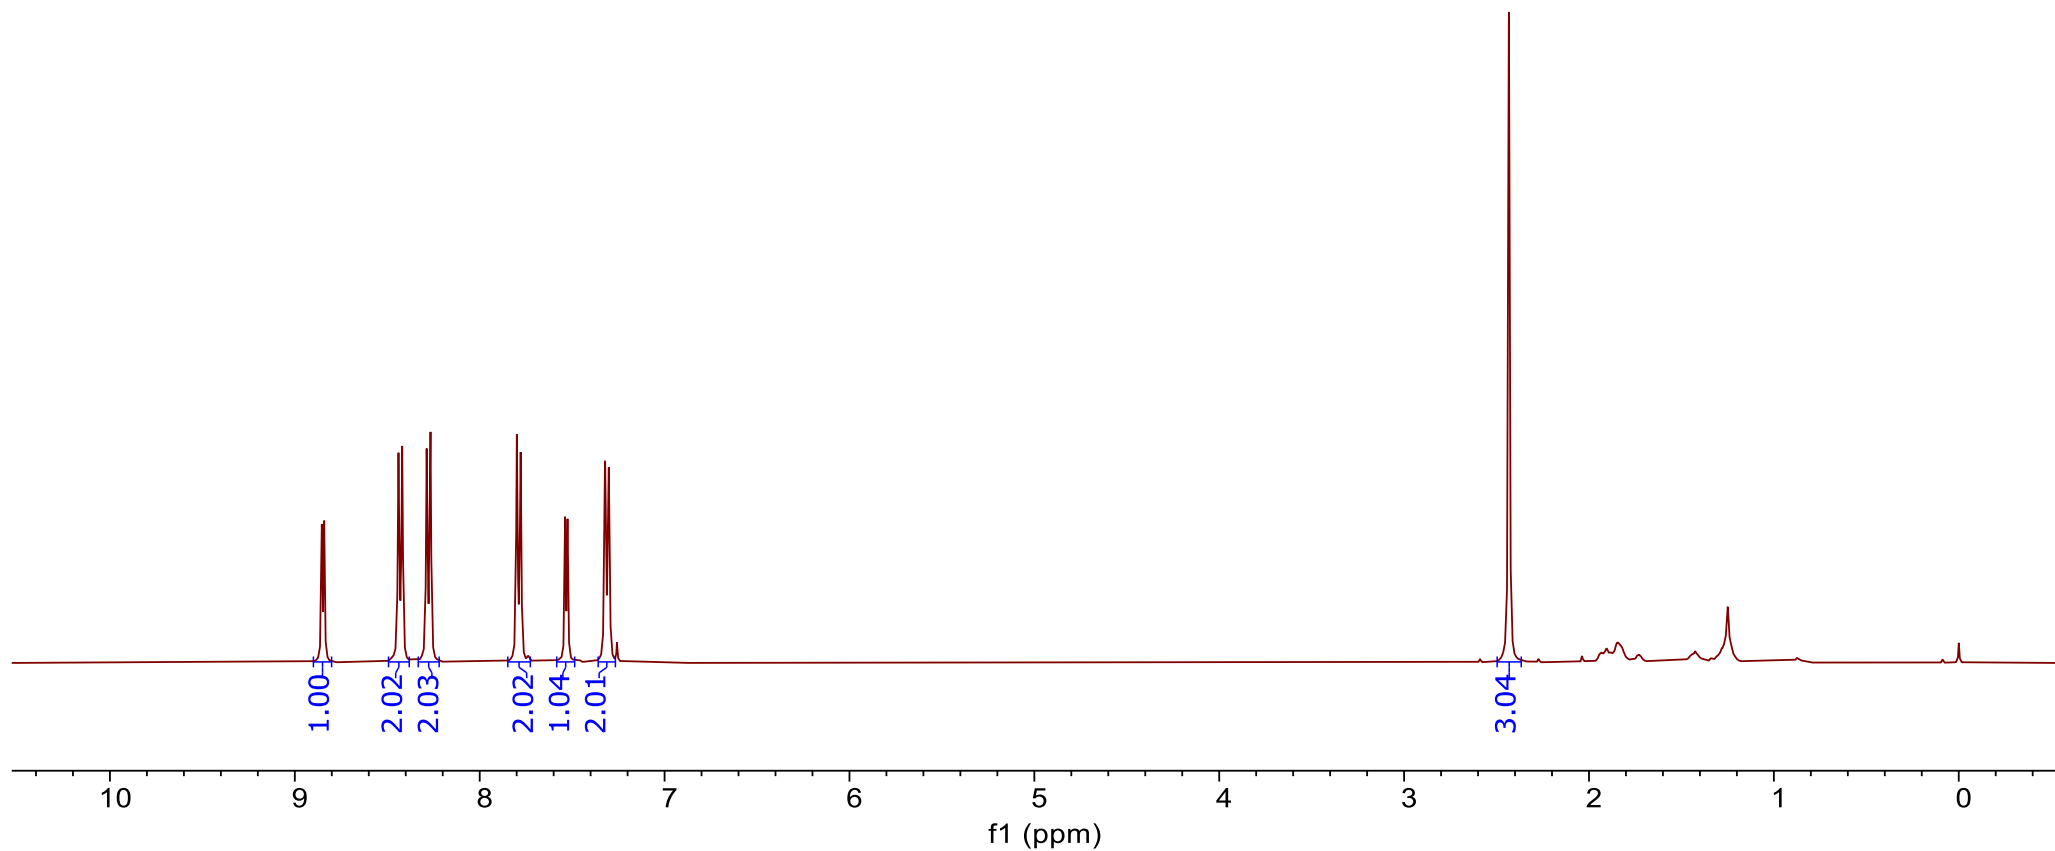

<sup>1</sup>H NMR Spectrum of 17e

CDCl<sub>3</sub>, 100.62 MHz

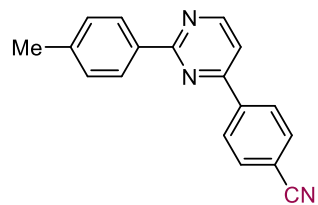

17e

165.02  
161.69  
158.47  
141.51  
141.22  
134.70  
132.73  
129.48  
128.36  
127.79  
118.53  
114.60  
114.30

21.64  
21.59

21.64  
21.59

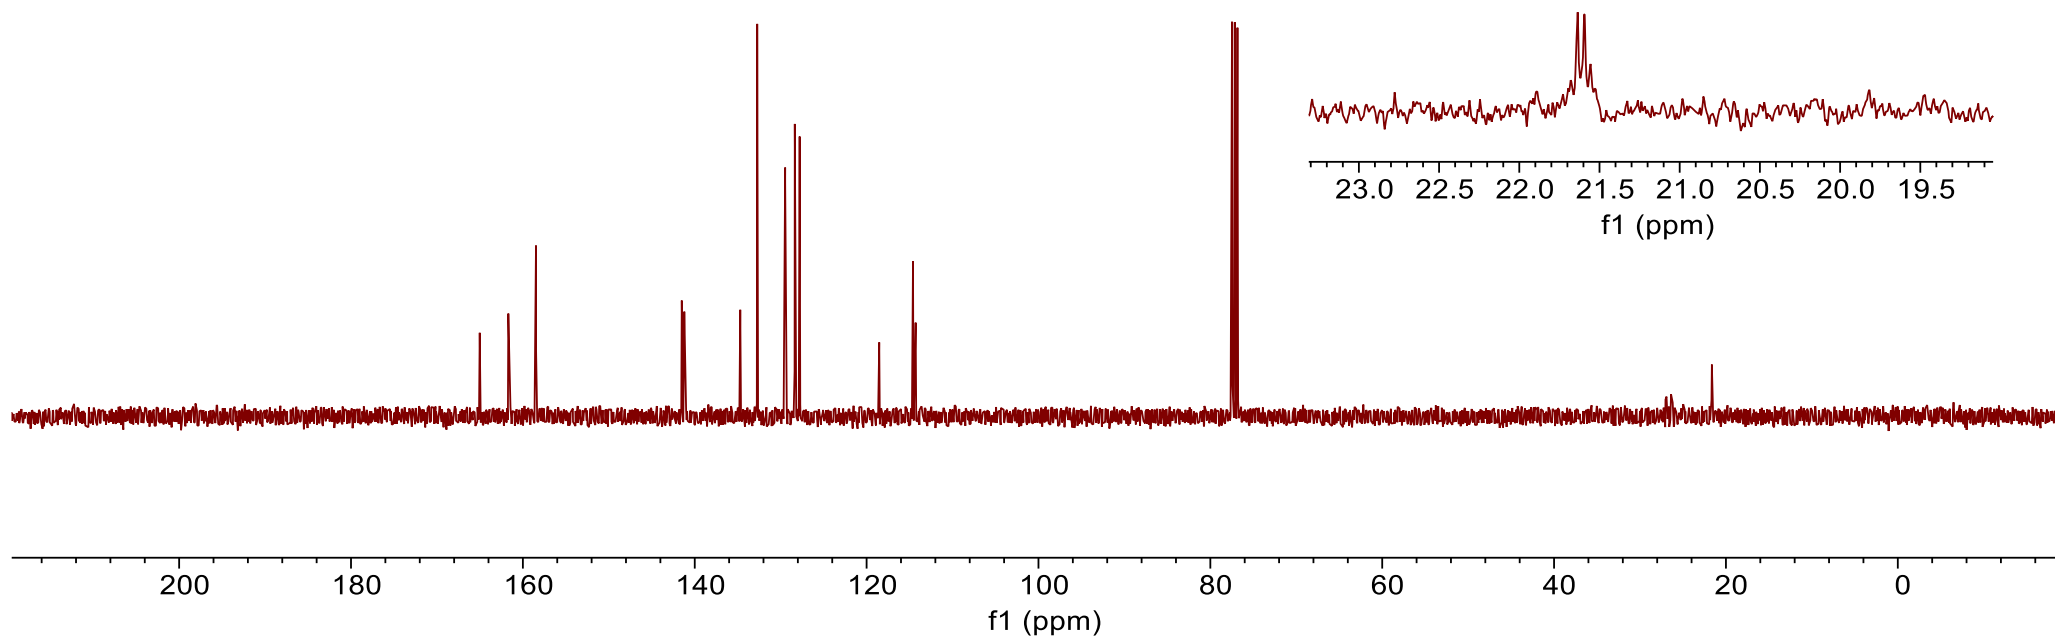

<sup>13</sup>C NMR Spectrum of 17e

CDCl<sub>3</sub>, 400.13 MHz

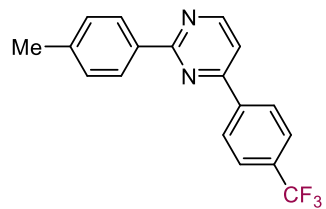

17f

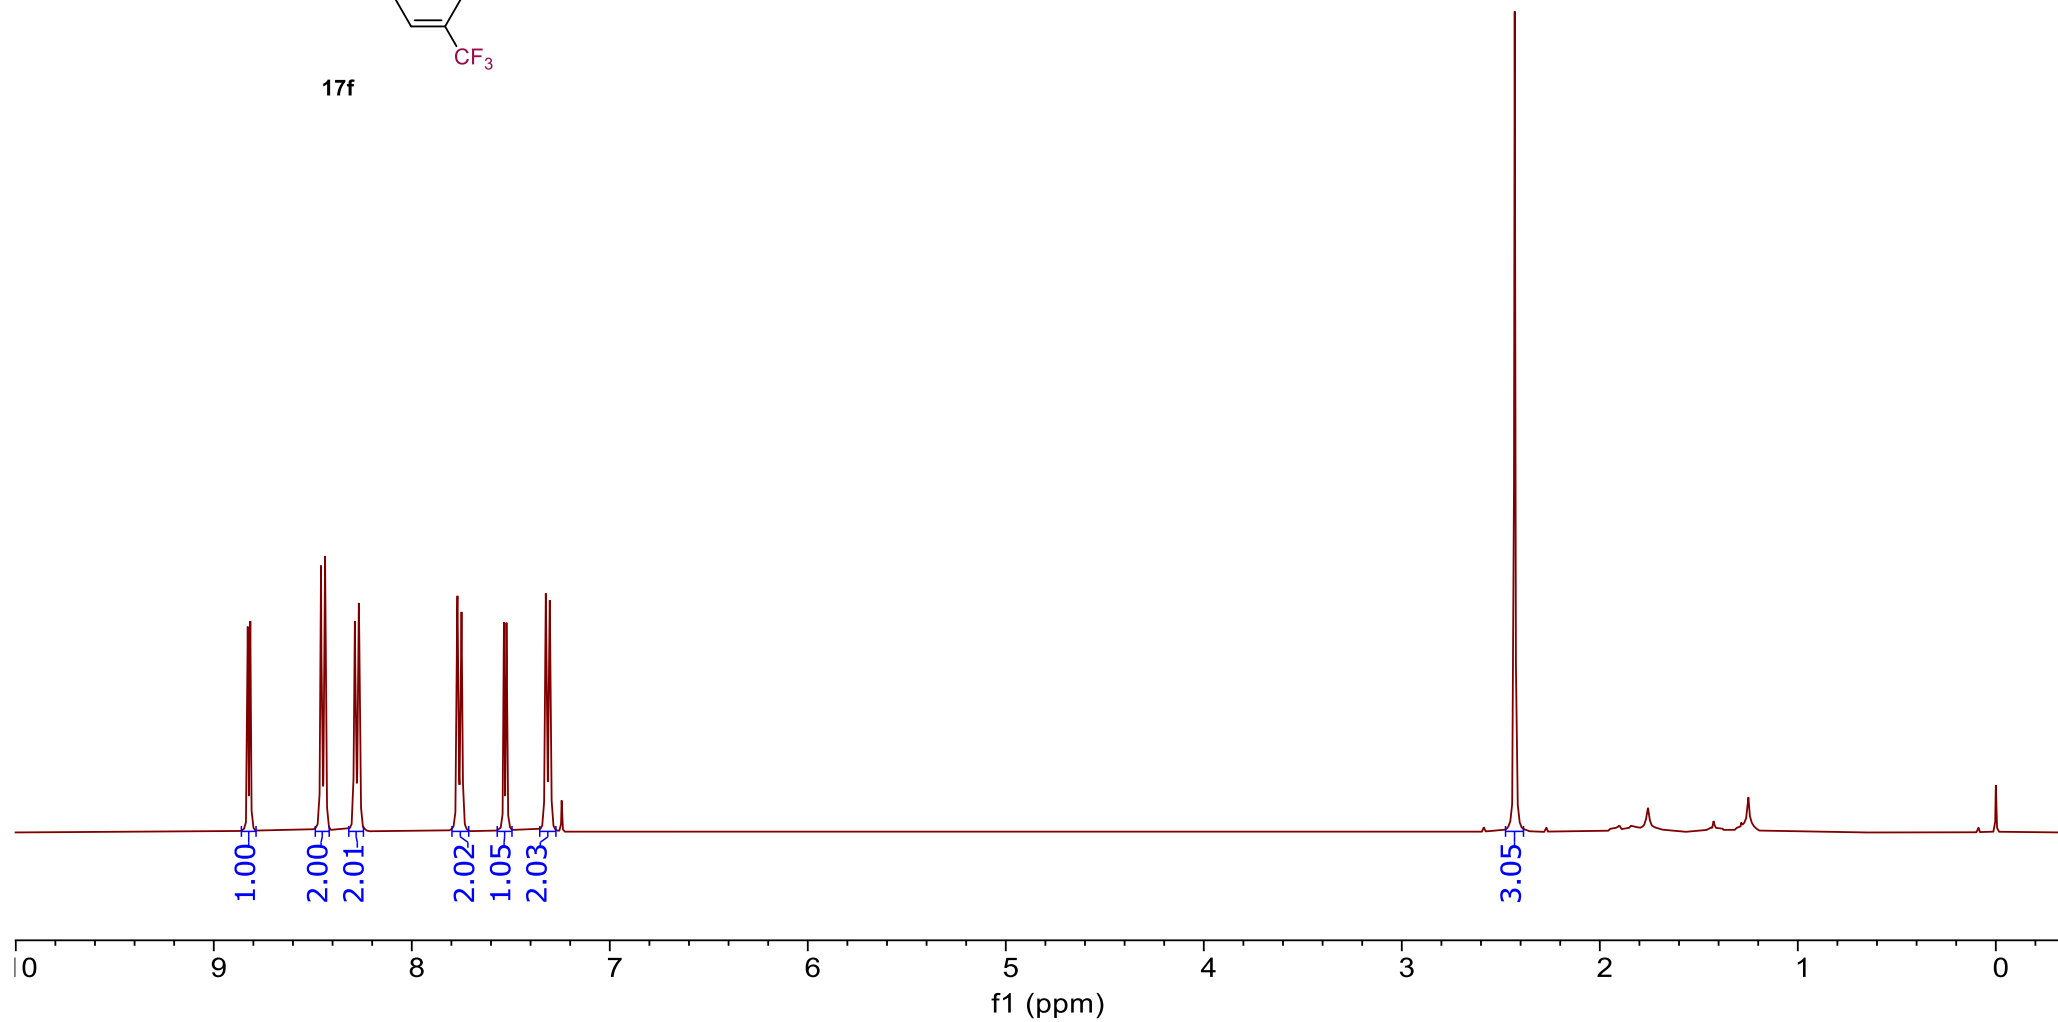

<sup>1</sup>H NMR Spectrum of 17f

CDCl<sub>3</sub>, 100.62 MHz

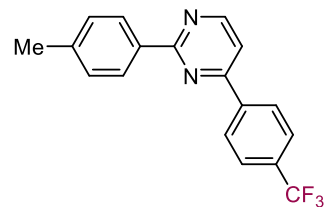

17f

165.01  
162.39  
158.32  
141.41  
140.54  
134.94  
133.09  
132.76  
132.44  
132.12  
129.50  
128.40  
128.15  
127.65  
126.01  
125.97  
125.93  
125.90  
125.44  
122.73  
120.03  
114.61

21.65  
21.61

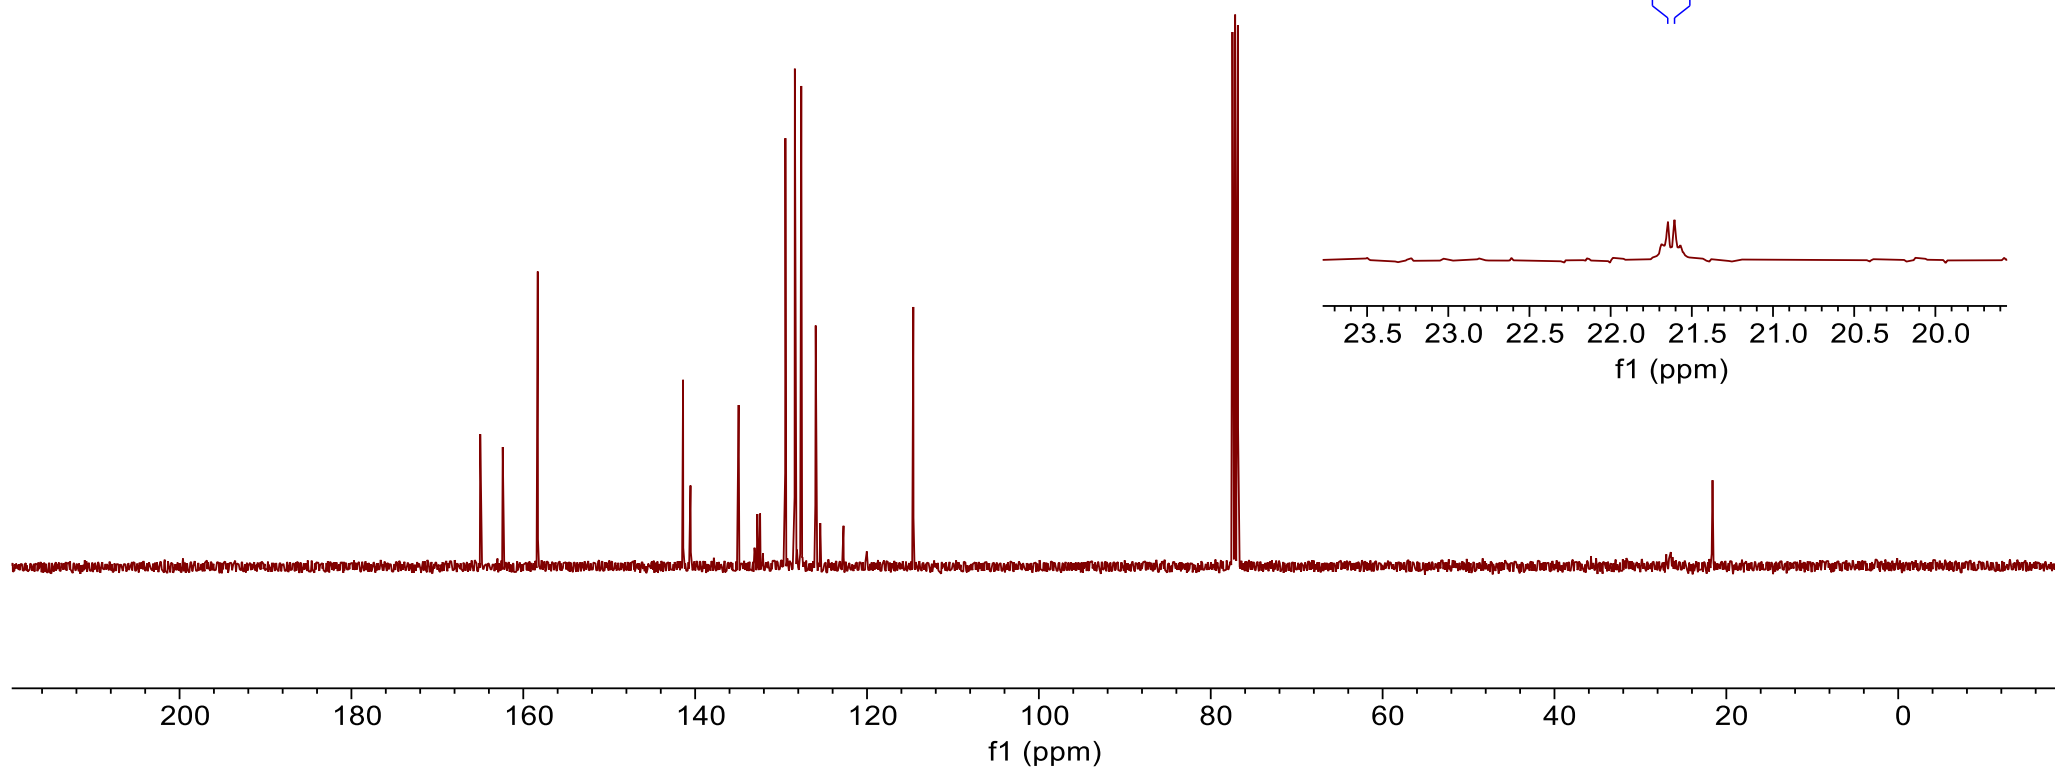

<sup>13</sup>C NMR Spectrum of 17f

CDCl<sub>3</sub>, 376.46 MHz

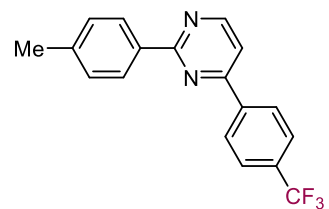

**17f**

— -62.77

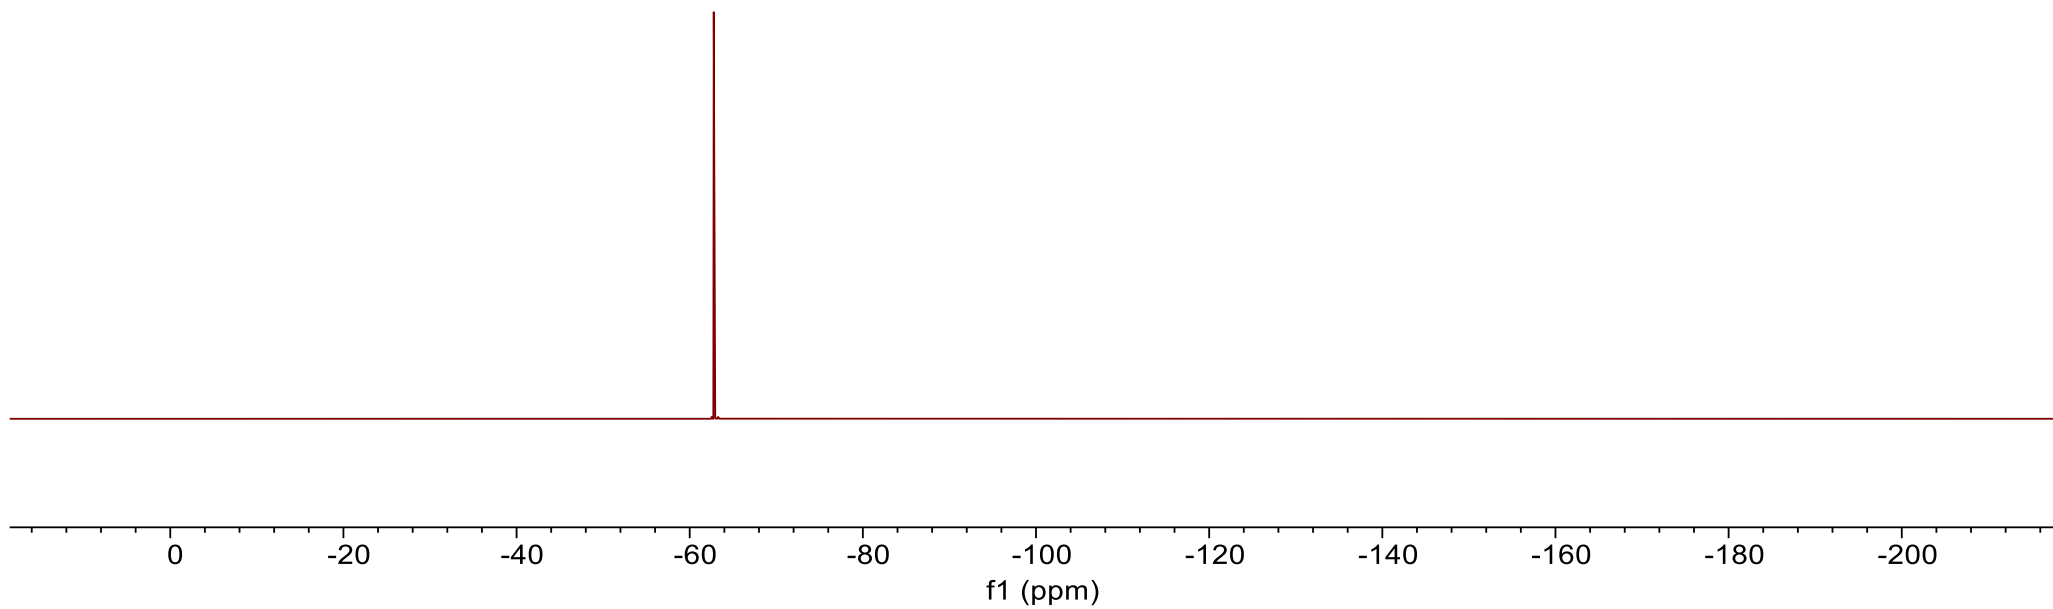

<sup>19</sup>F NMR Spectrum of **17f**

CDCl<sub>3</sub>, 400.13 MHz

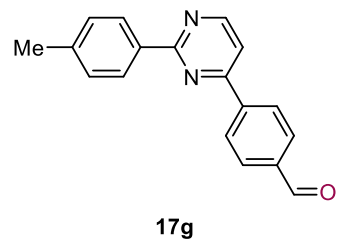

— -0.00

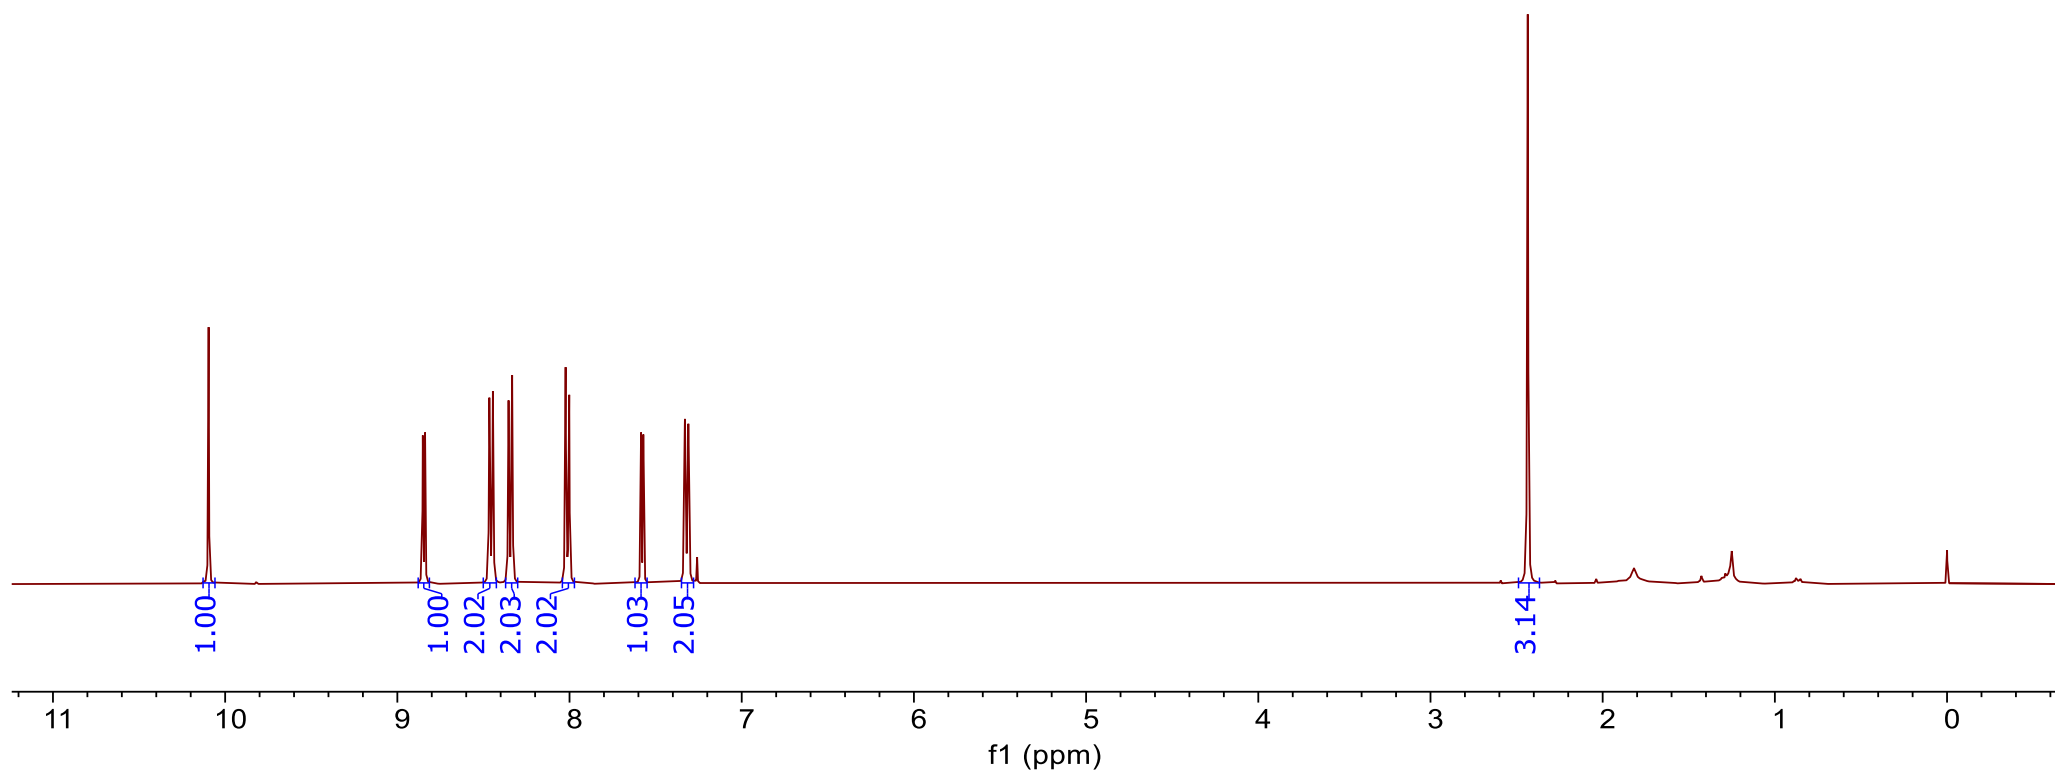

<sup>1</sup>H NMR Spectrum of 17g



CDCI3, 100.62 MHz

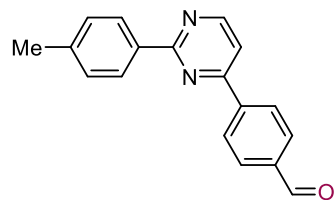

17g

191.88  
191.86

164.99  
162.41  
158.34

142.58  
141.40  
137.83  
134.88  
130.23  
129.48  
128.39  
127.88  
114.87

21.65  
21.61

191.88  
191.86

21.65  
21.61

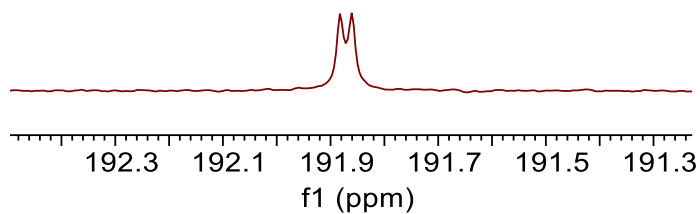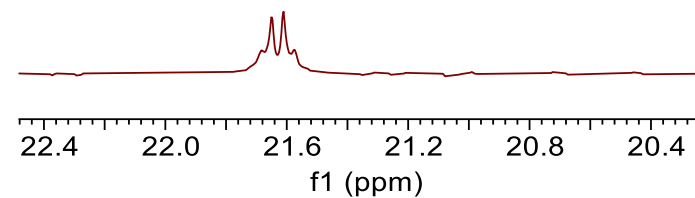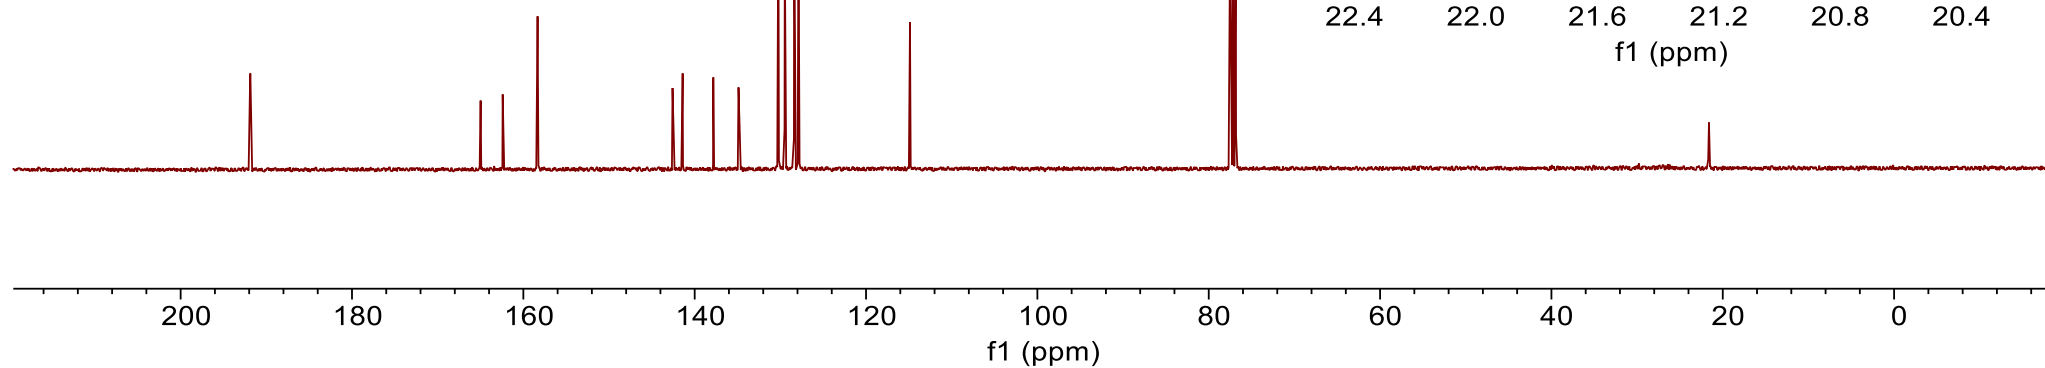

<sup>13</sup>C NMR Spectrum of 17g

DMSO, 400.13 MHz

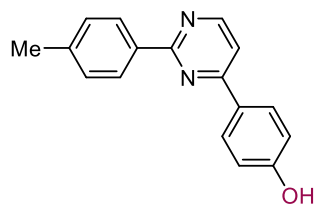

17h

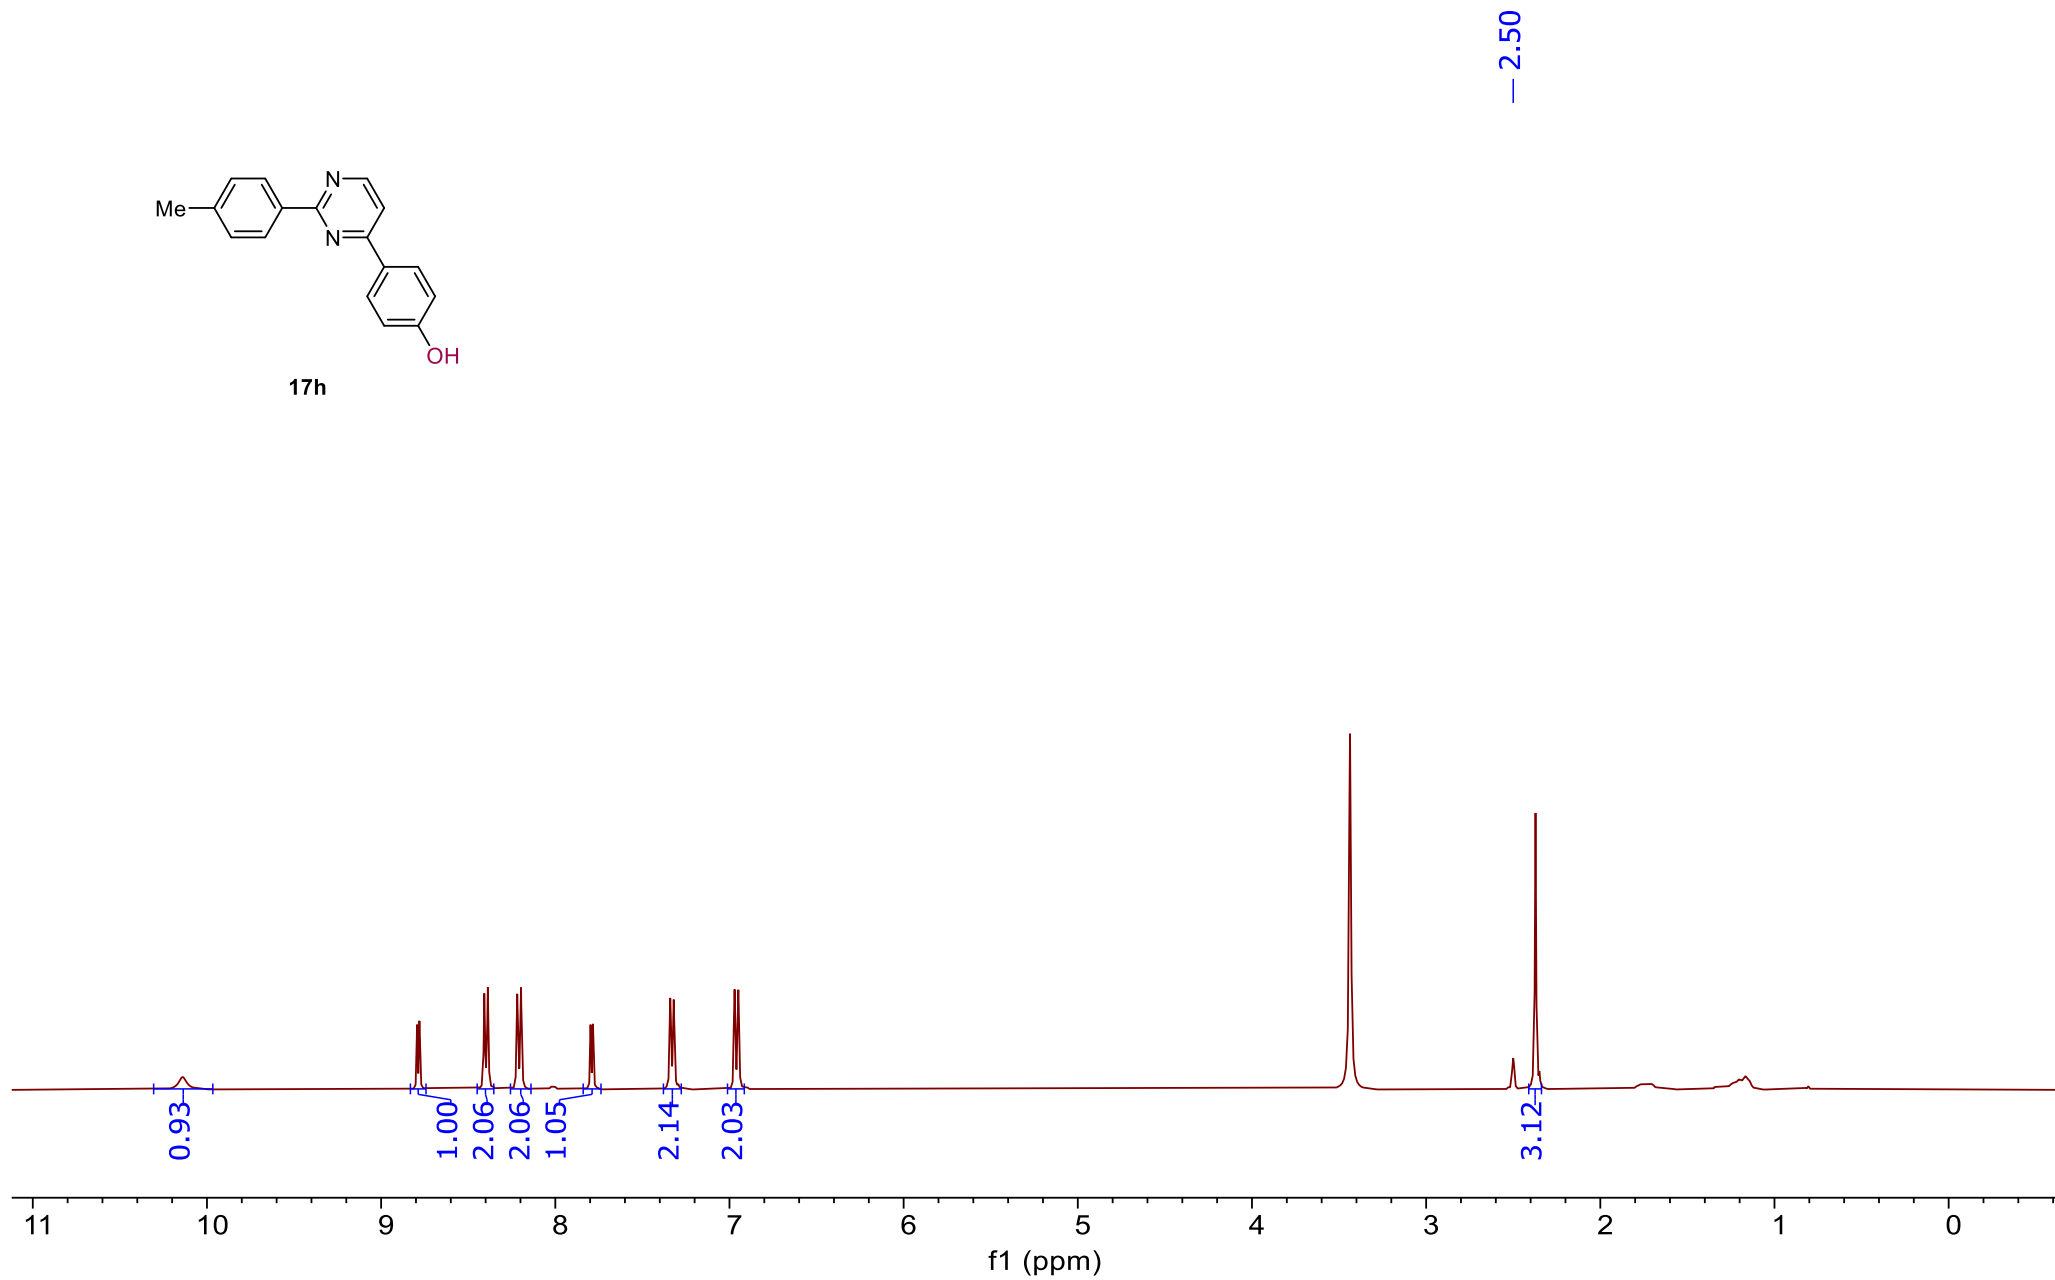

<sup>1</sup>H NMR Spectrum of 17h

DMSO, 100.62 MHz

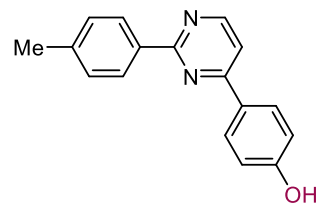

17h

163.21  
162.76  
160.57  
158.00

140.53  
134.96  
129.28  
128.89  
127.79  
127.01

115.86  
113.55

21.09  
21.04

21.09  
21.04

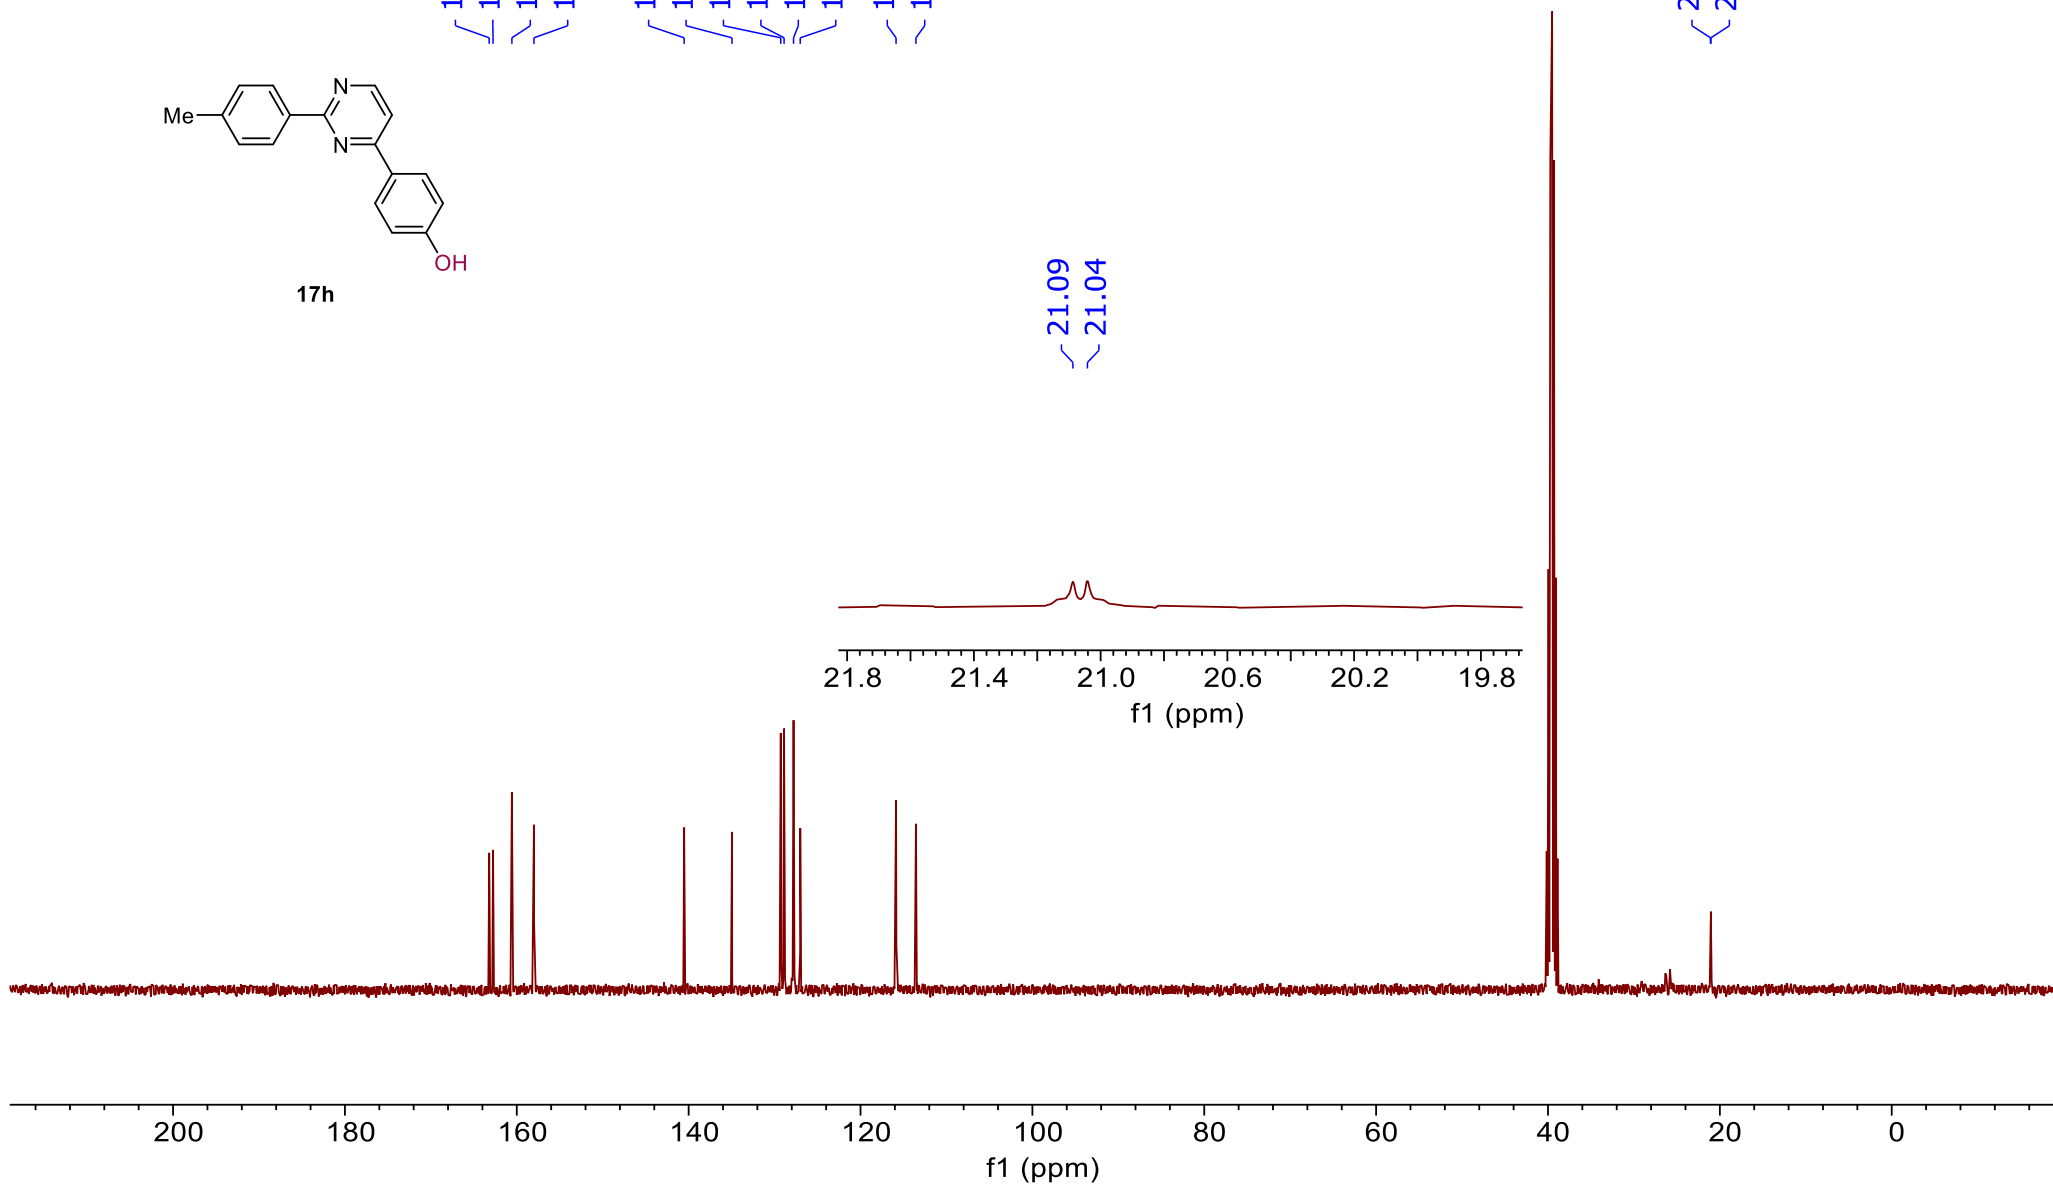

$^{13}\text{C}$  NMR Spectrum of 17h

CDCl<sub>3</sub>, 400.13 MHz

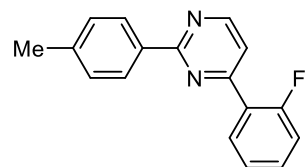

17i

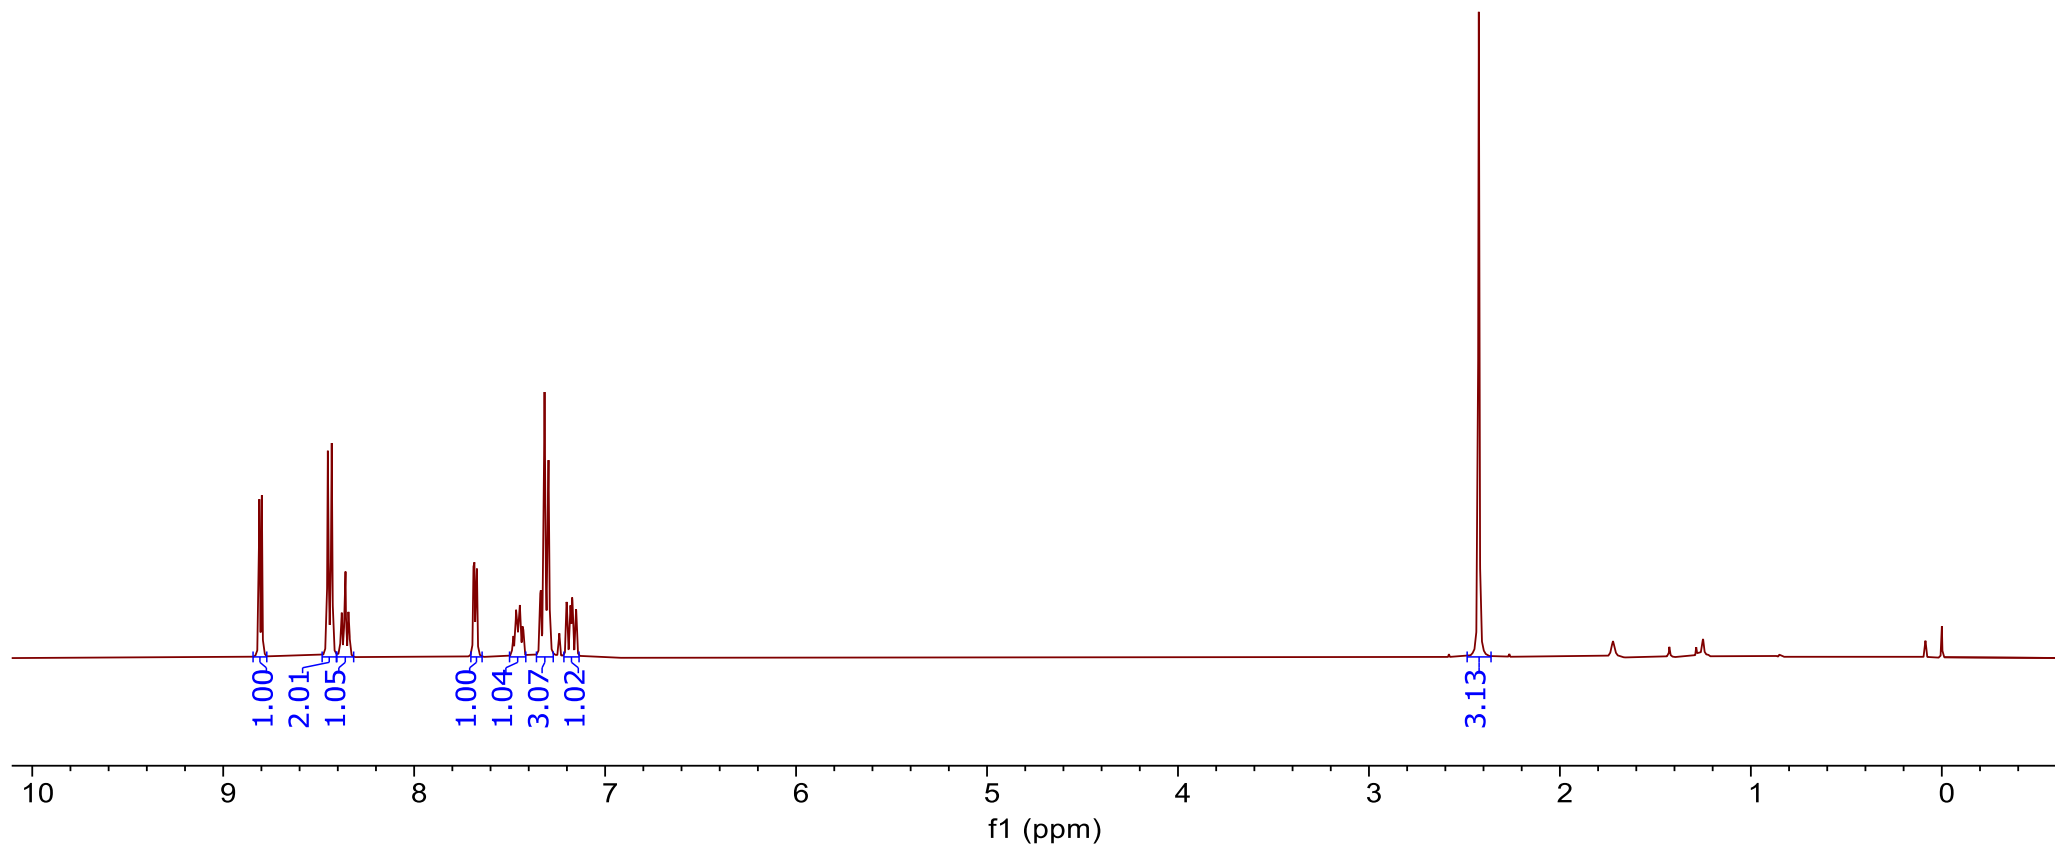

-0.00

<sup>1</sup>H NMR Spectrum of 17i

CDCl<sub>3</sub>, 100.62 MHz

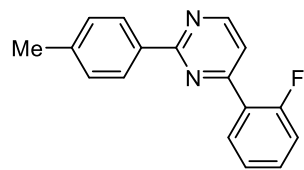

17i

164.76  
162.95  
160.44  
160.08  
160.06  
157.80  
141.10  
135.19  
132.35  
132.26  
131.08  
131.06  
129.43  
128.30  
125.36  
125.26  
124.82  
124.78  
118.67  
118.55  
116.66  
116.43

21.64  
21.60

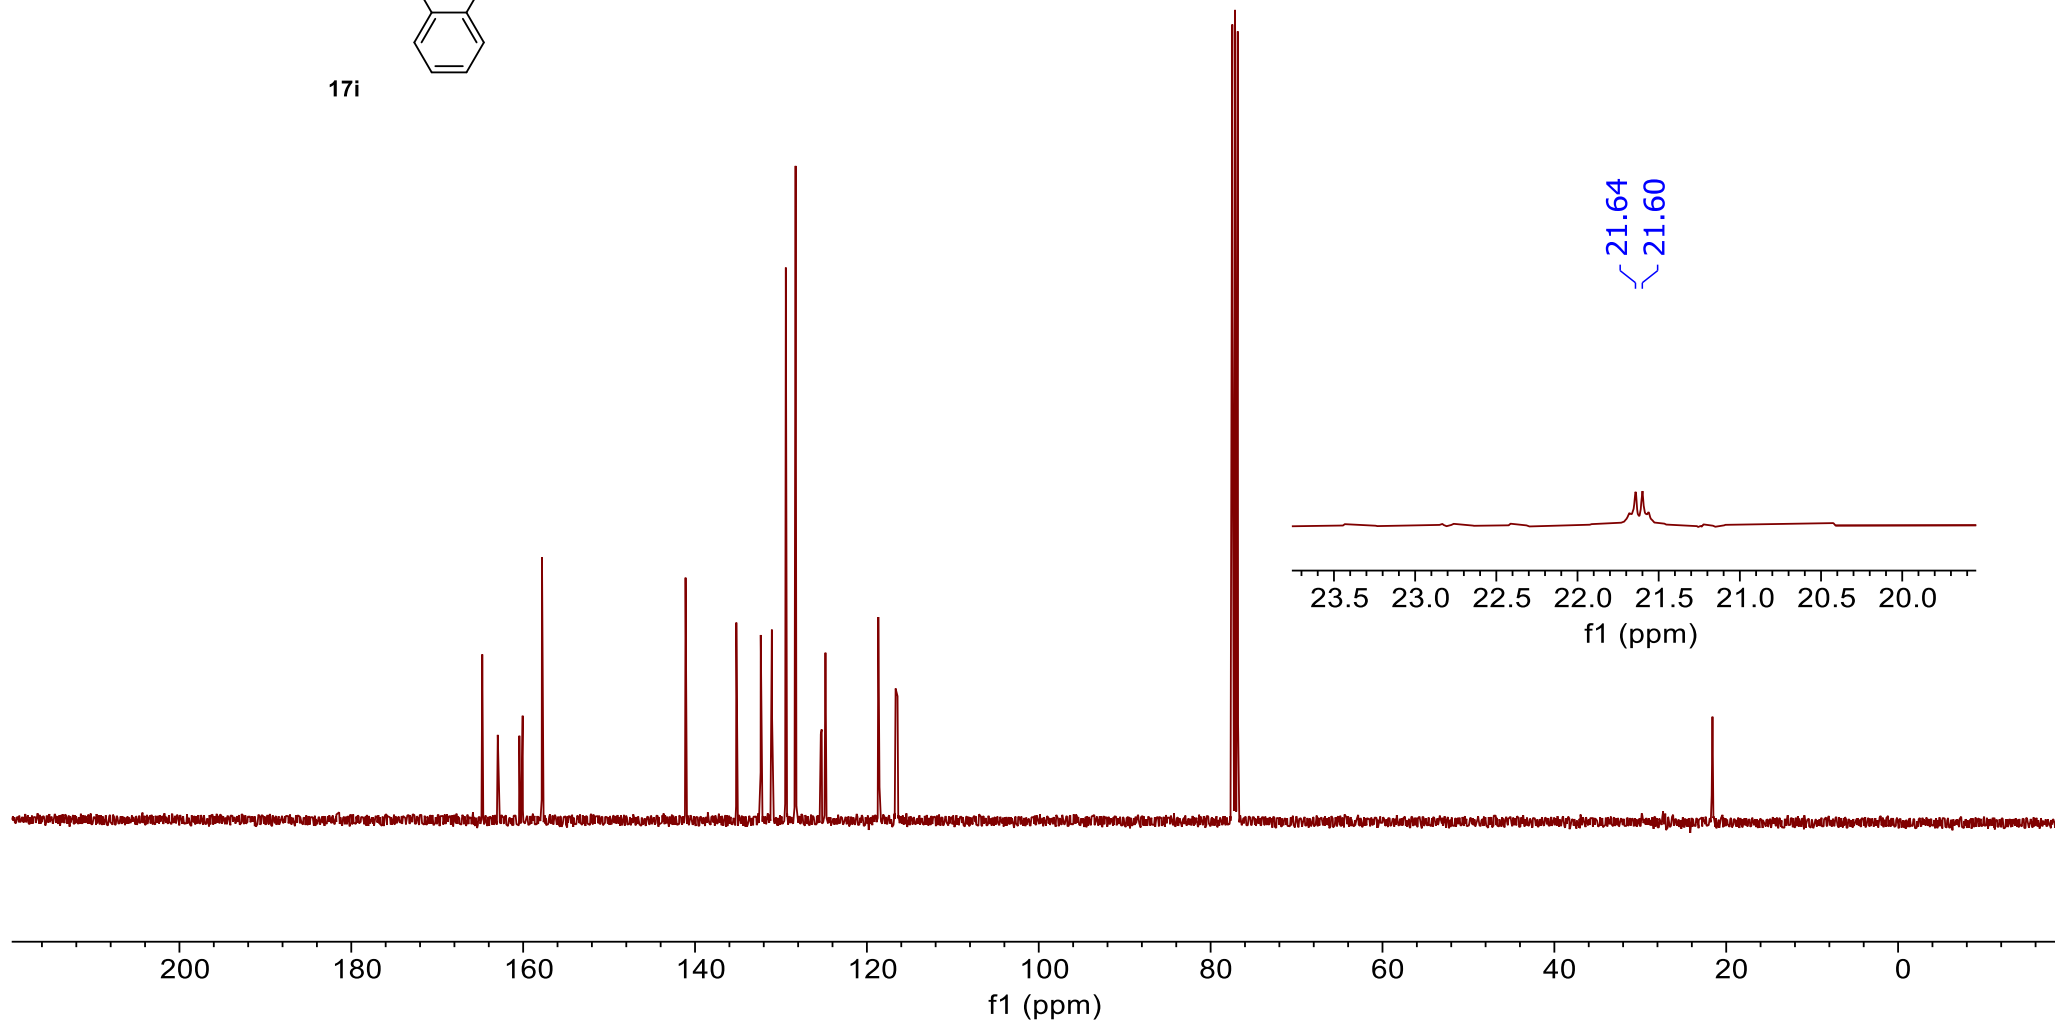

<sup>13</sup>C NMR Spectrum of 17i

CDCl<sub>3</sub>, 376.46 MHz

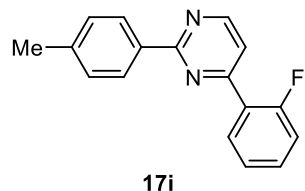

-114.73

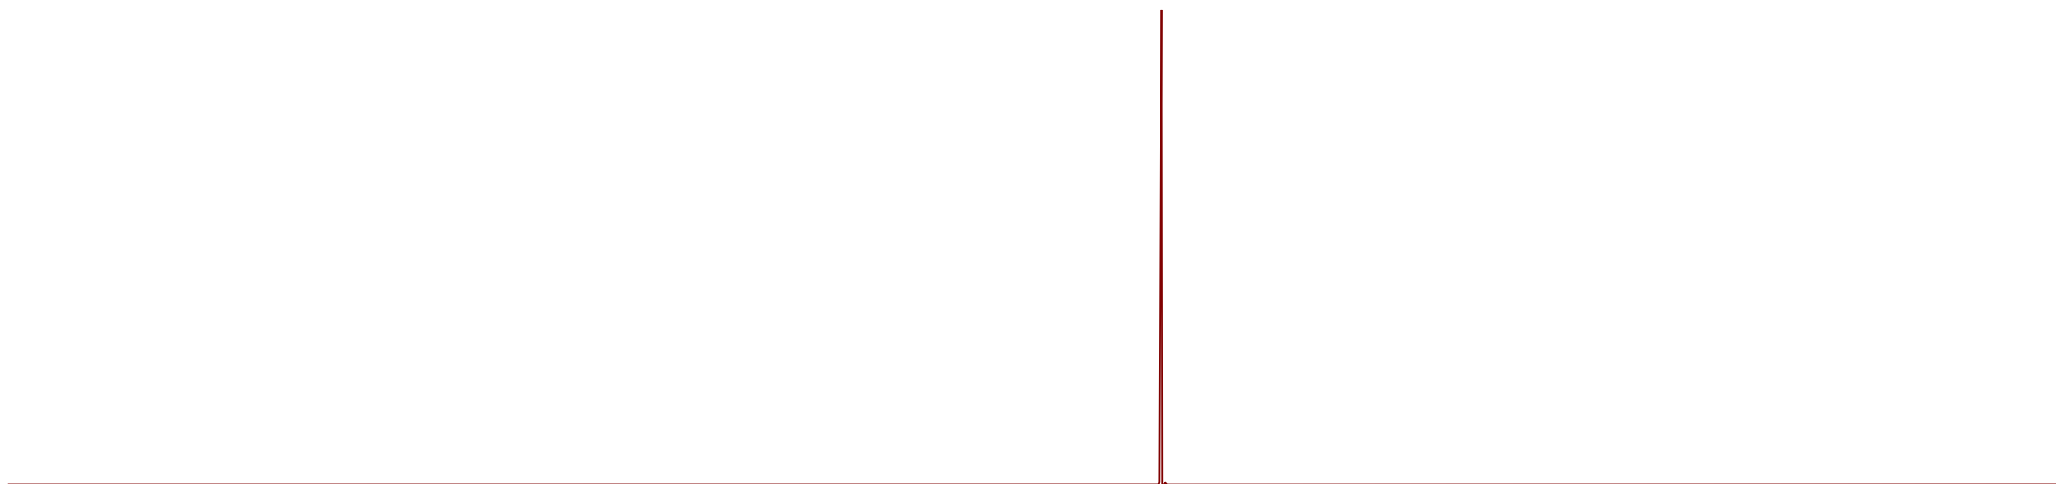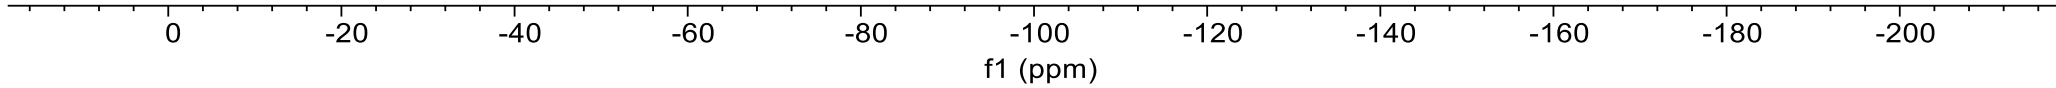

<sup>19</sup>F NMR Spectrum of 17i

CDCl<sub>3</sub>, 400.13 MHz

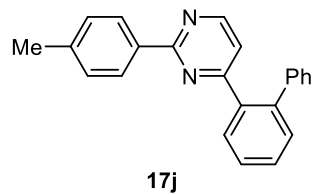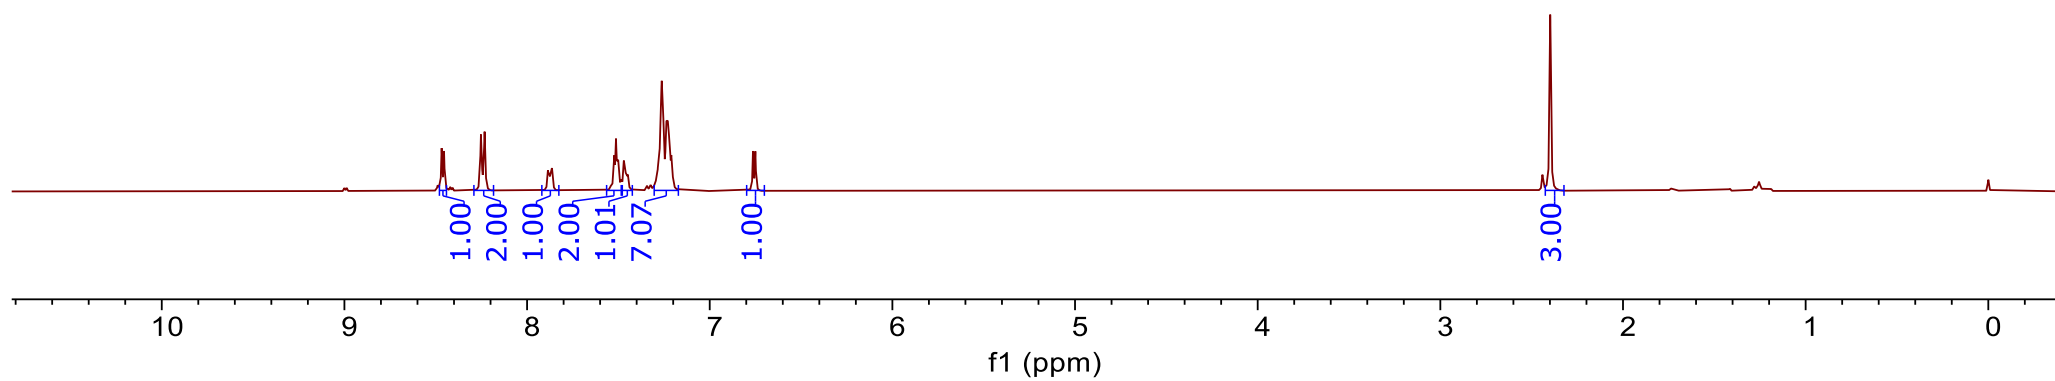

<sup>1</sup>H NMR Spectrum of 17j

CDCl<sub>3</sub>, 100.62 MHz

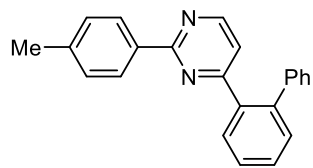

17j

166.46  
164.70  
156.27  
141.46  
141.15  
140.90  
137.43  
135.23  
131.03  
130.70  
129.85  
129.72  
129.32  
128.45  
128.29  
127.92  
127.25  
119.48

21.61  
21.58

21.61  
21.58

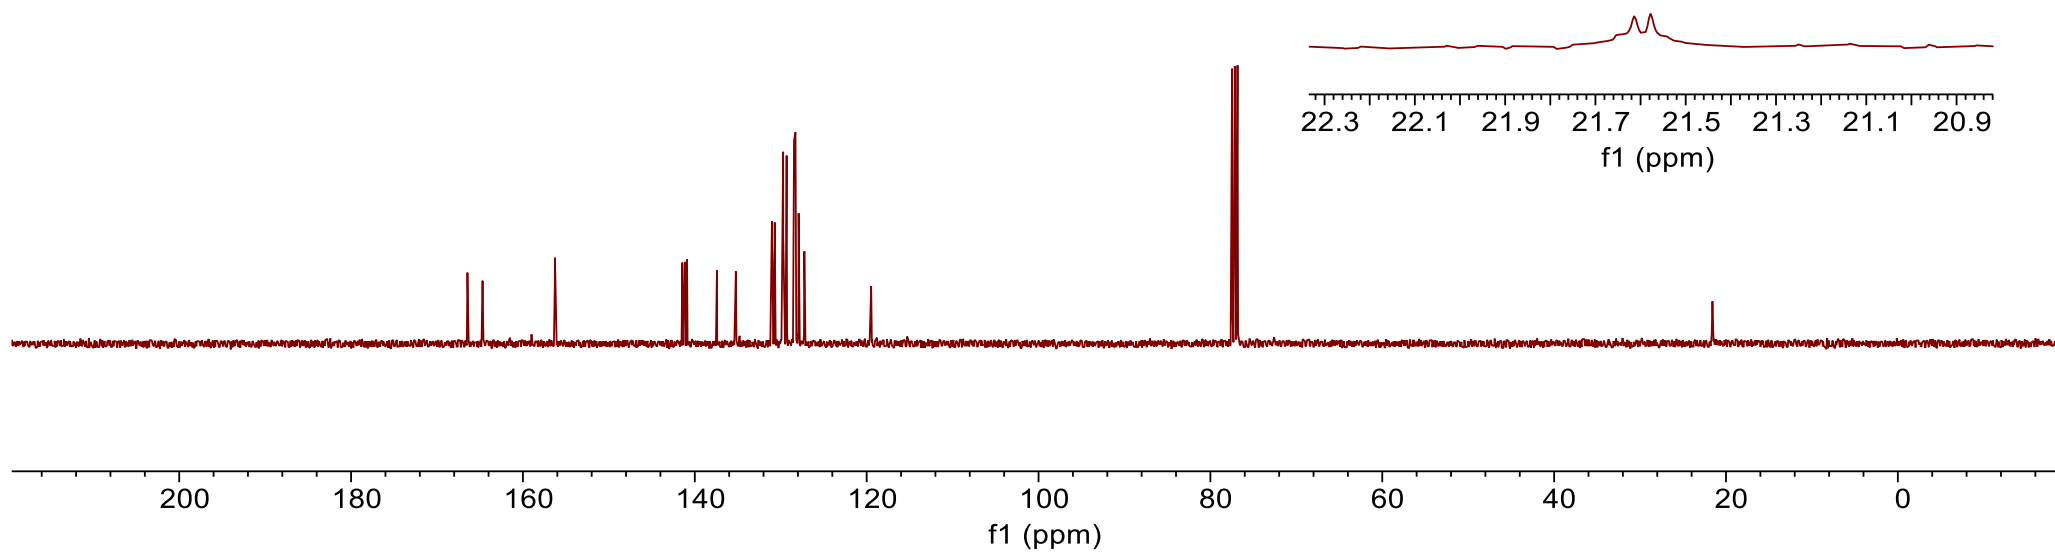

<sup>13</sup>C NMR Spectrum of 17j



CDCl<sub>3</sub>, 400.13 MHz

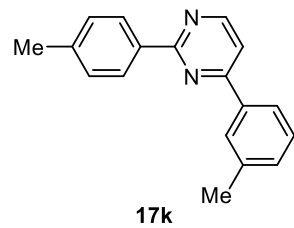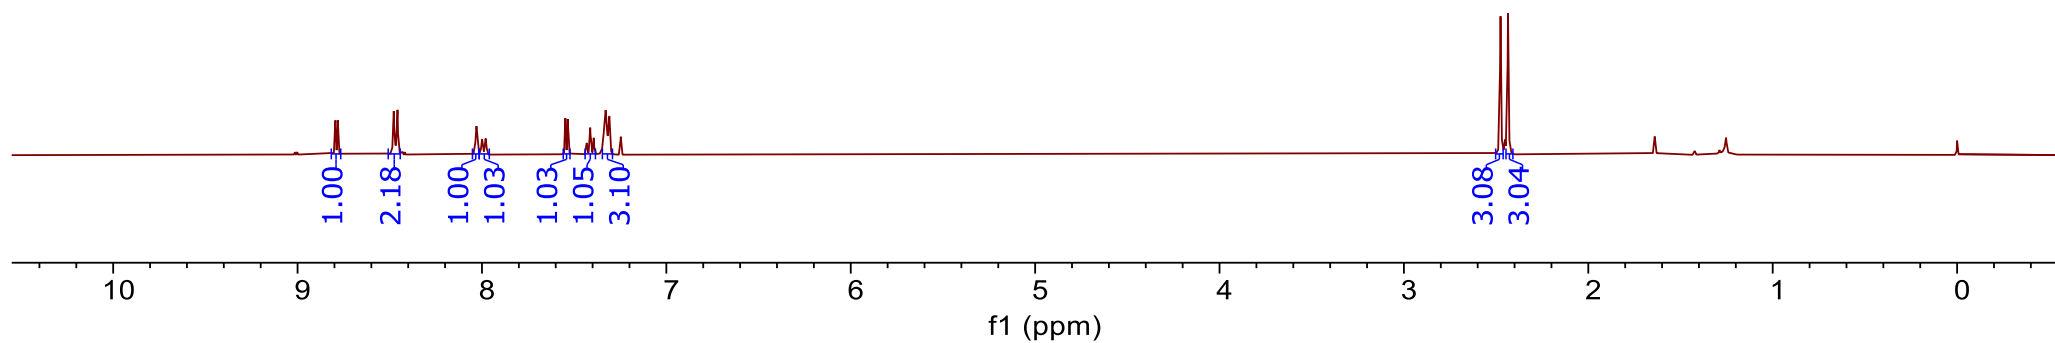

<sup>1</sup>H NMR Spectrum of 17k

— -0.00

CDCl<sub>3</sub>, 100.62 MHz

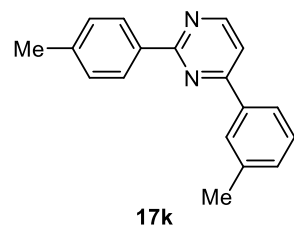

164.78  
164.13  
157.82  
141.03  
138.75  
137.19  
135.38  
131.80  
129.43  
128.95  
128.38  
127.96  
124.50  
114.47

21.71  
21.65

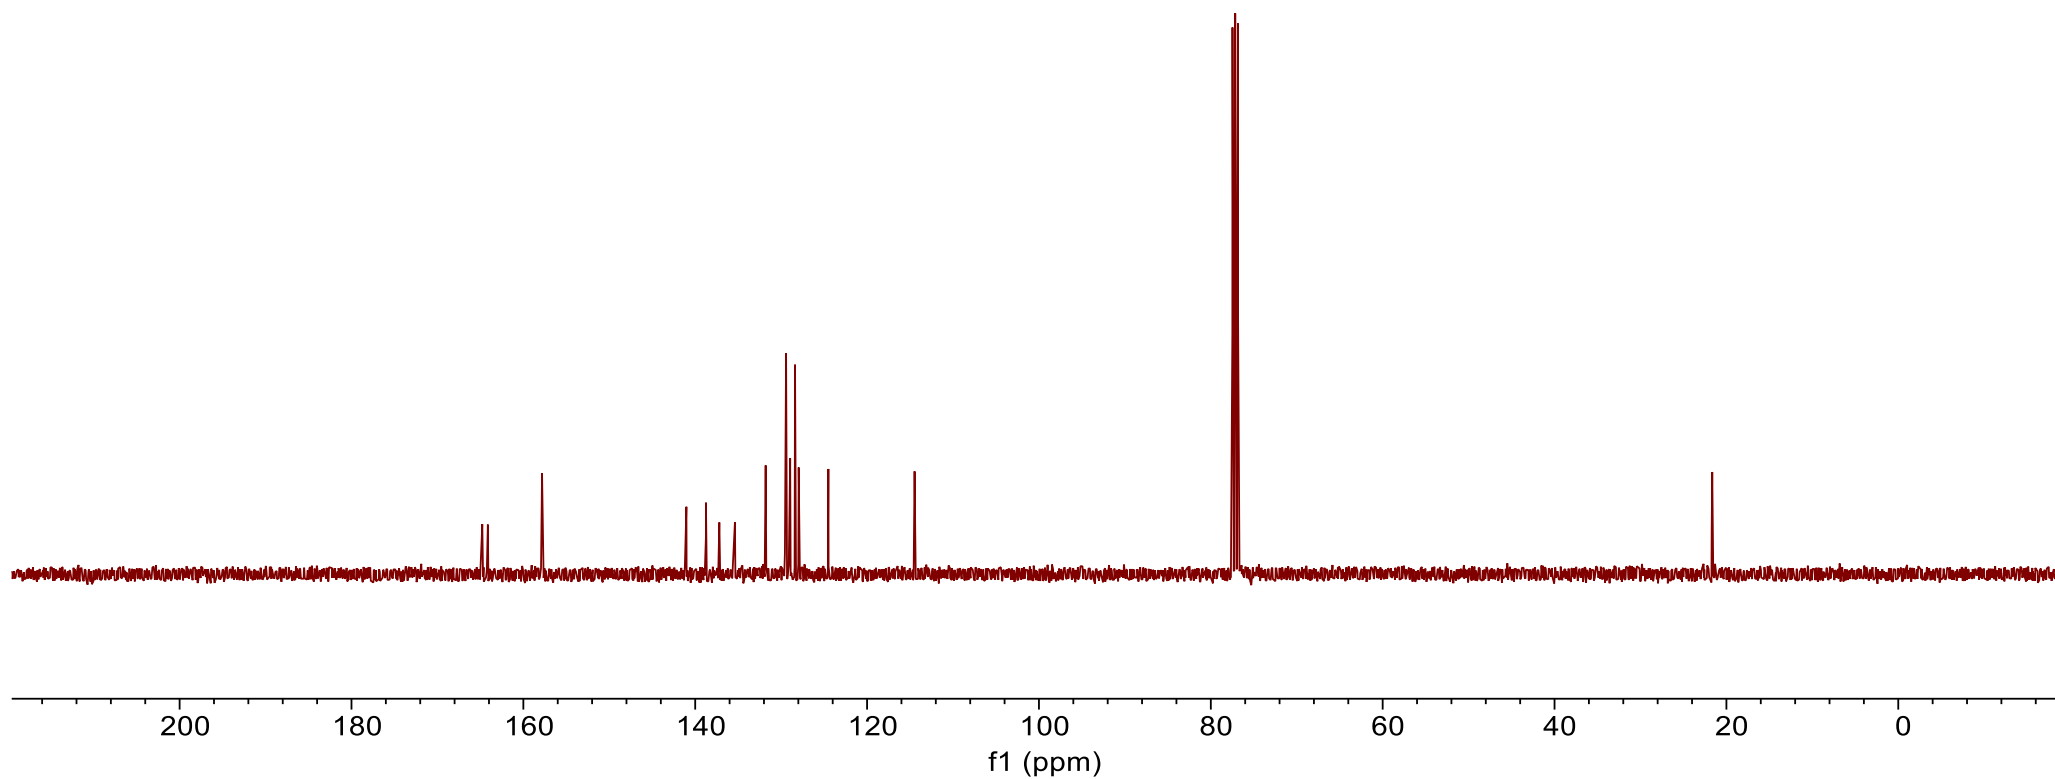

<sup>13</sup>C NMR Spectrum of 17k

CDCl<sub>3</sub>, 400.13 MHz

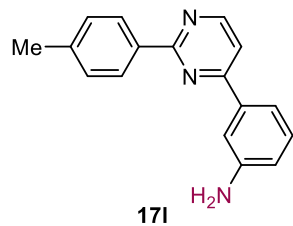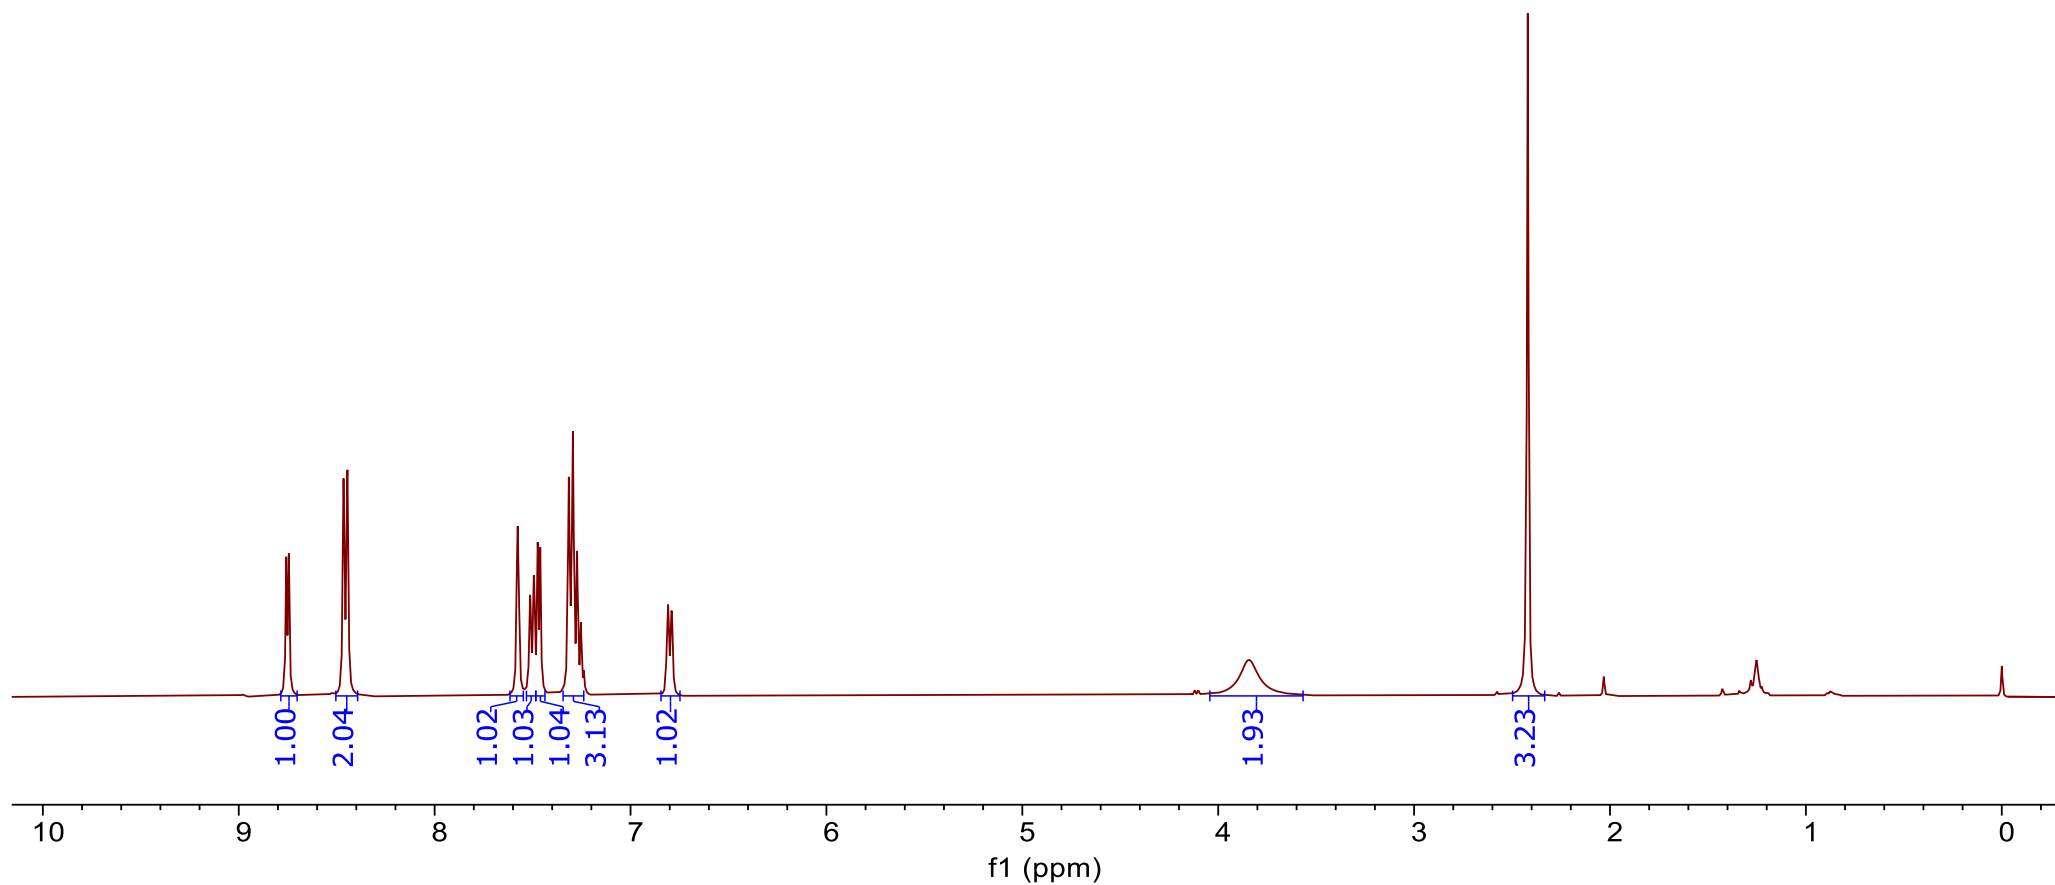

<sup>1</sup>H NMR Spectrum of 17l

0.00

CDCl<sub>3</sub>, 100.62 MHz

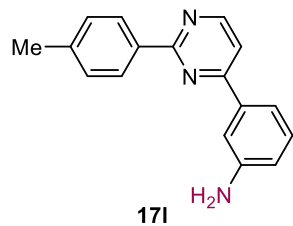

164.61  
164.00  
157.72  
147.14  
140.96  
138.20  
135.35  
129.88  
129.37  
128.33  
117.67  
117.50  
114.46  
113.64

21.61  
21.58

21.61  
21.58

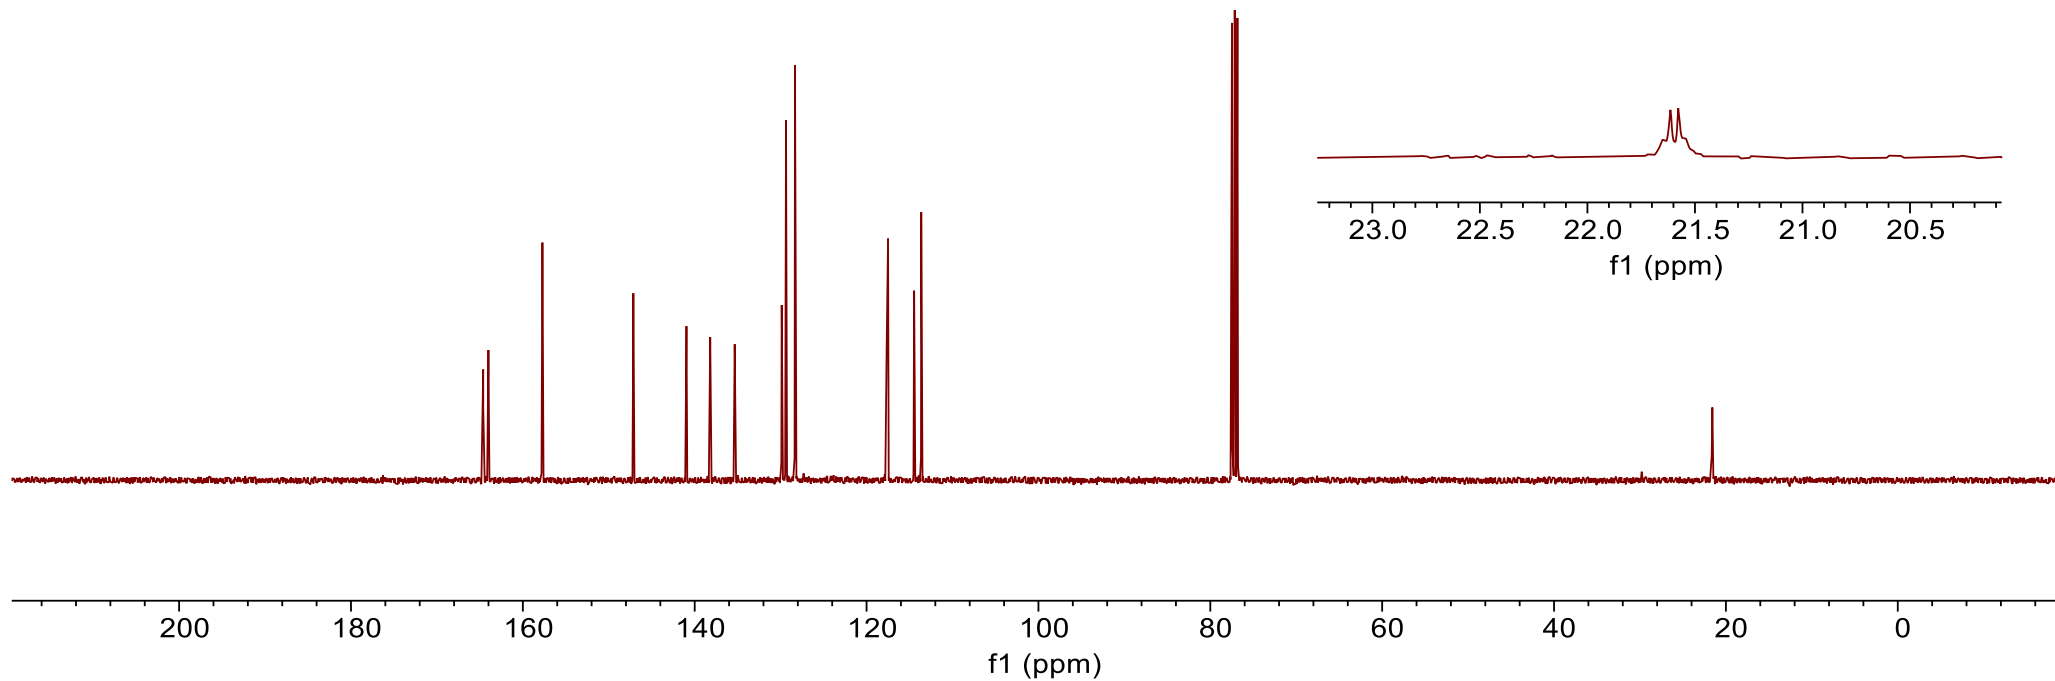

<sup>13</sup>C NMR Spectrum of **171**

CDCl<sub>3</sub>, 400.13 MHz

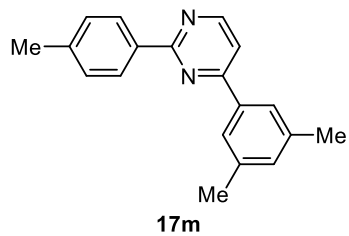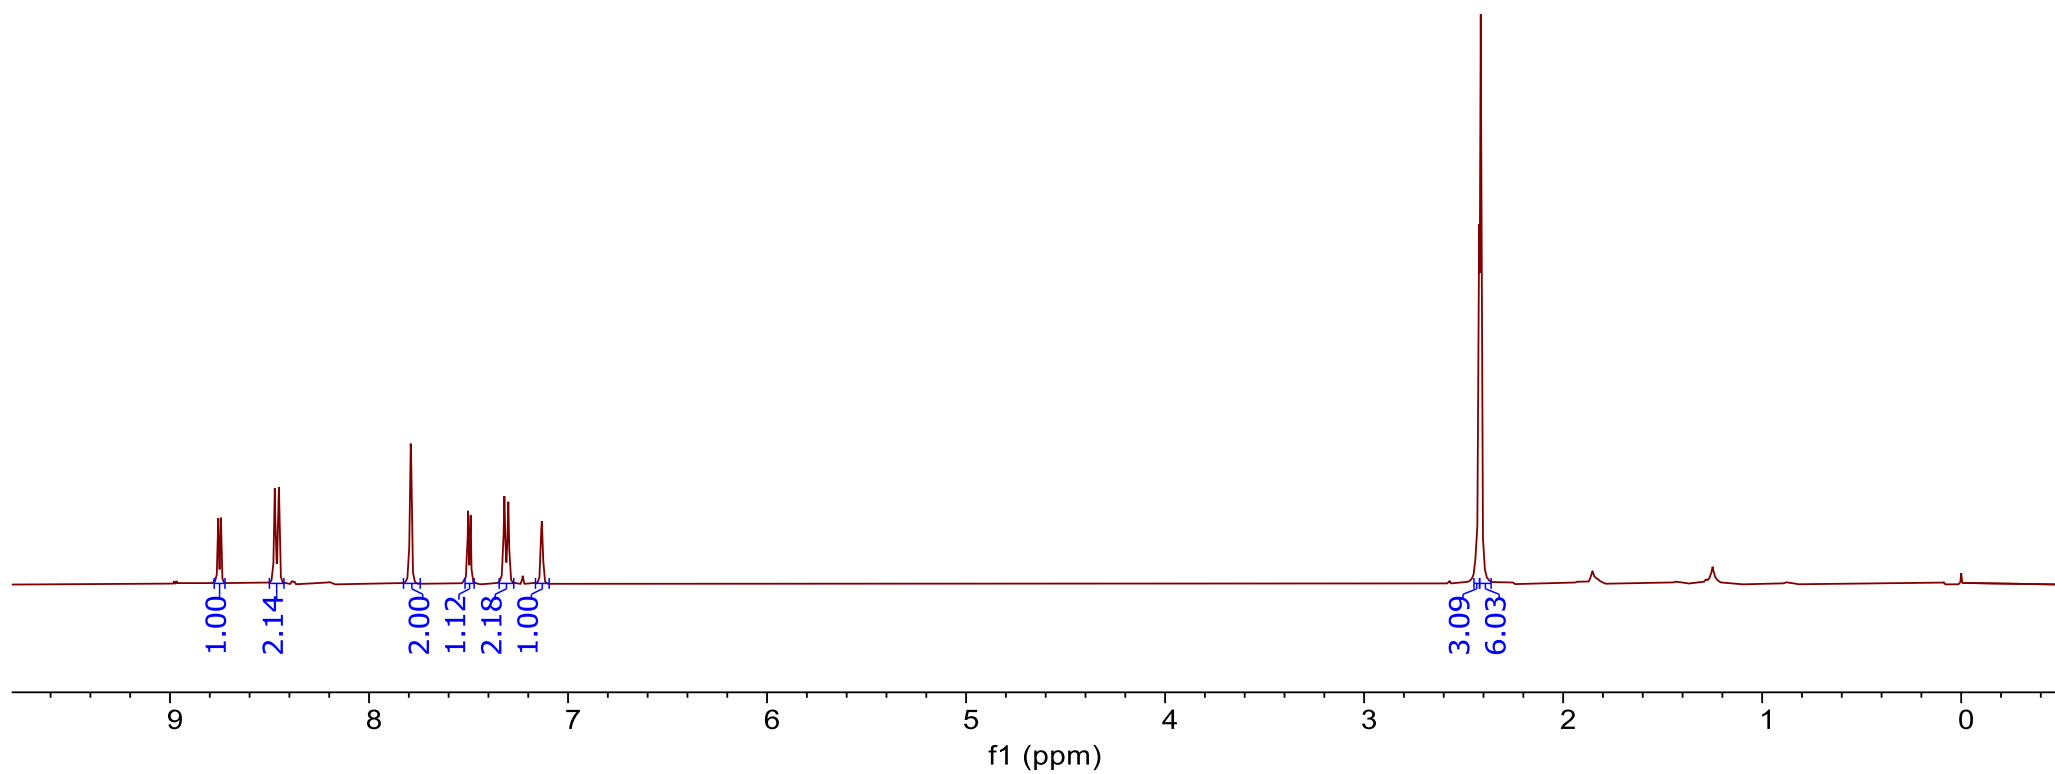

<sup>1</sup>H NMR Spectrum of **17m**

— 0.00

CDCl<sub>3</sub>, 100.62 MHz

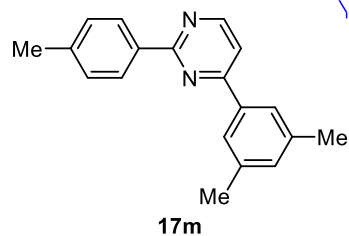

164.69  
164.24  
157.67  
140.92  
138.56  
137.13  
135.40  
132.67  
129.37  
128.35  
125.12  
114.50

21.63  
21.59  
21.55  
21.51

21.63  
21.59  
21.55  
21.51

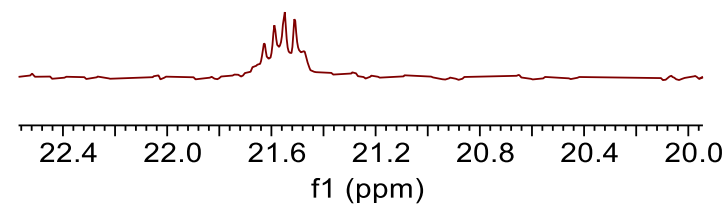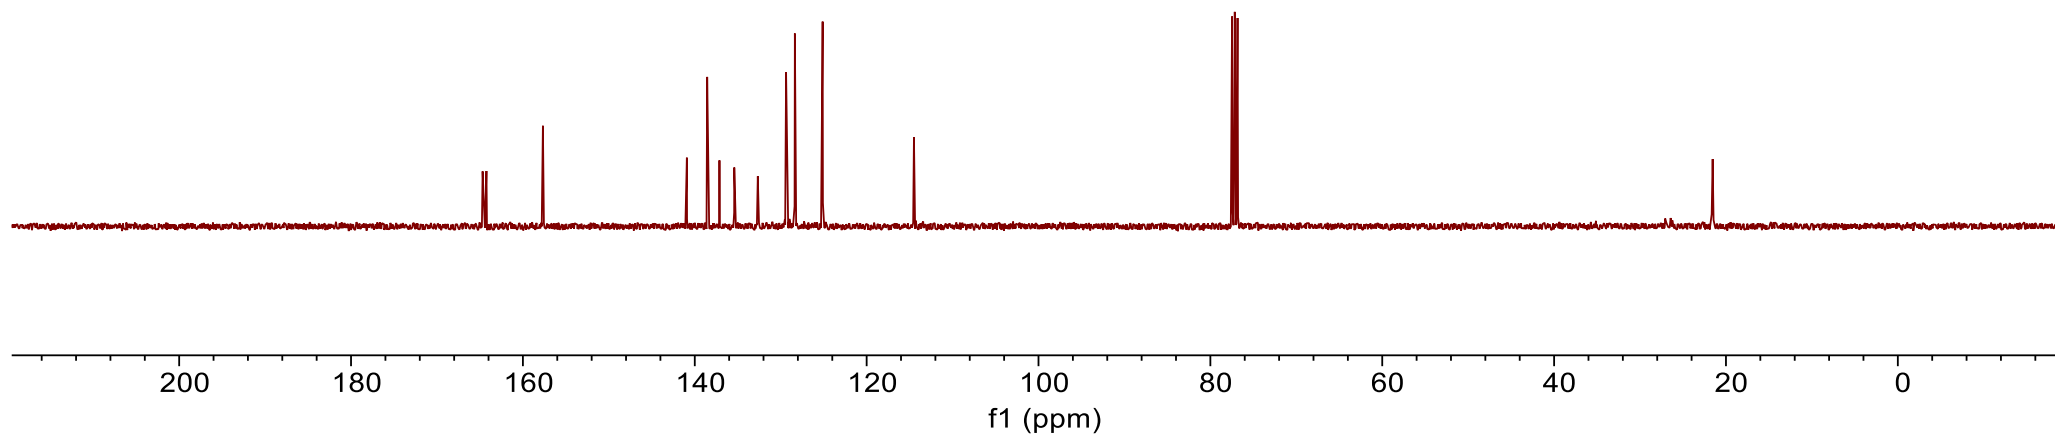

<sup>13</sup>C NMR Spectrum of 17m

CDCl<sub>3</sub>, 400.13 MHz

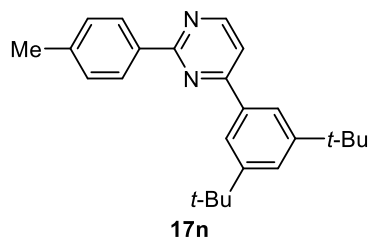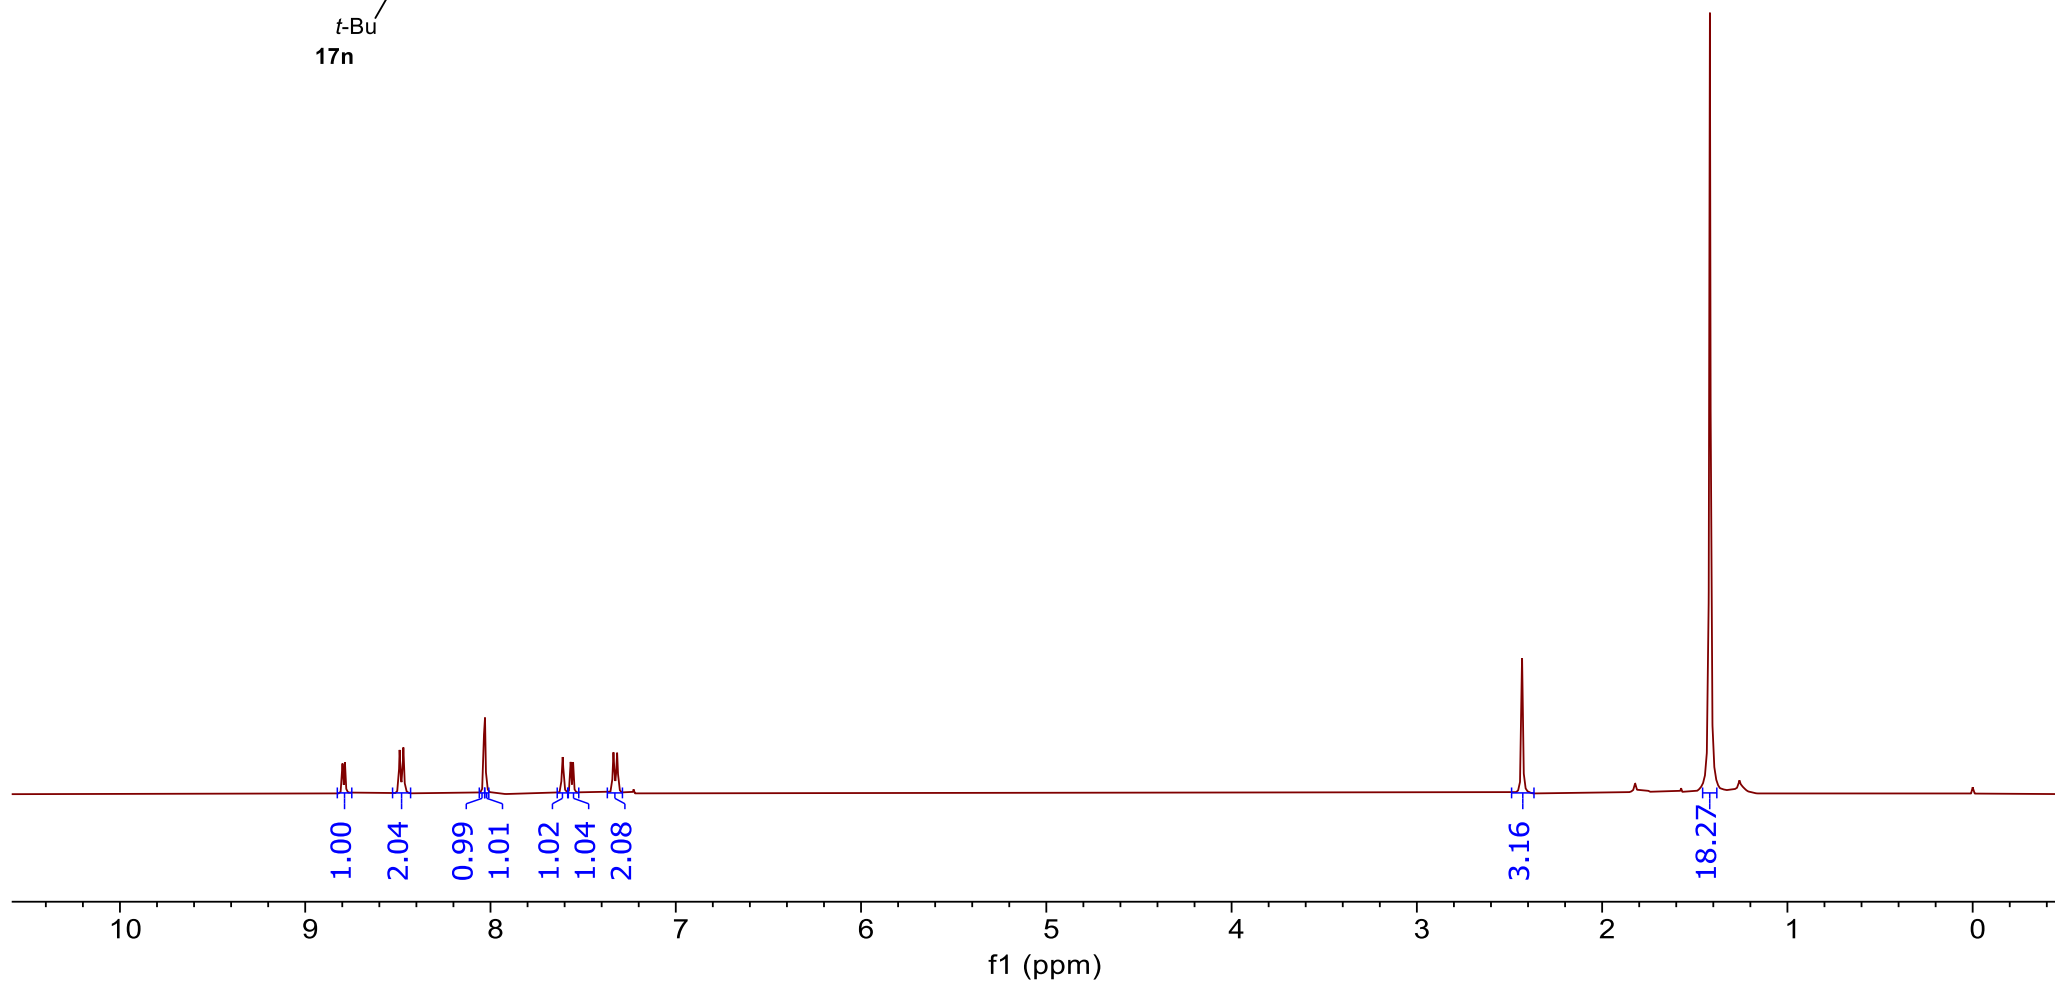

<sup>1</sup>H NMR Spectrum of **17n**

— -0.00

CDCl<sub>3</sub>, 100.62 MHz

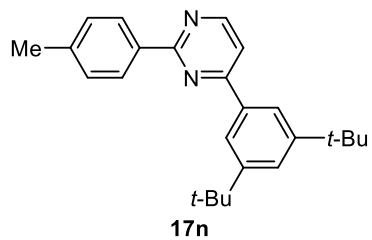

165.12  
164.63  
157.66  
151.58  
140.93  
136.75  
135.43  
129.42  
128.33  
125.24  
121.69  
114.81

35.17  
31.62  
21.65  
21.60

21.65  
21.60

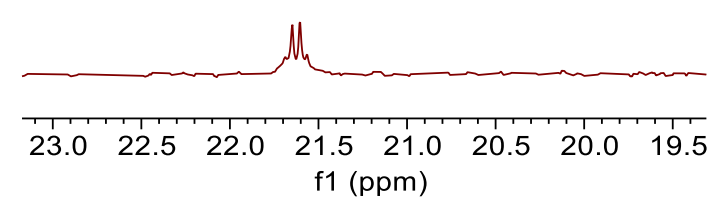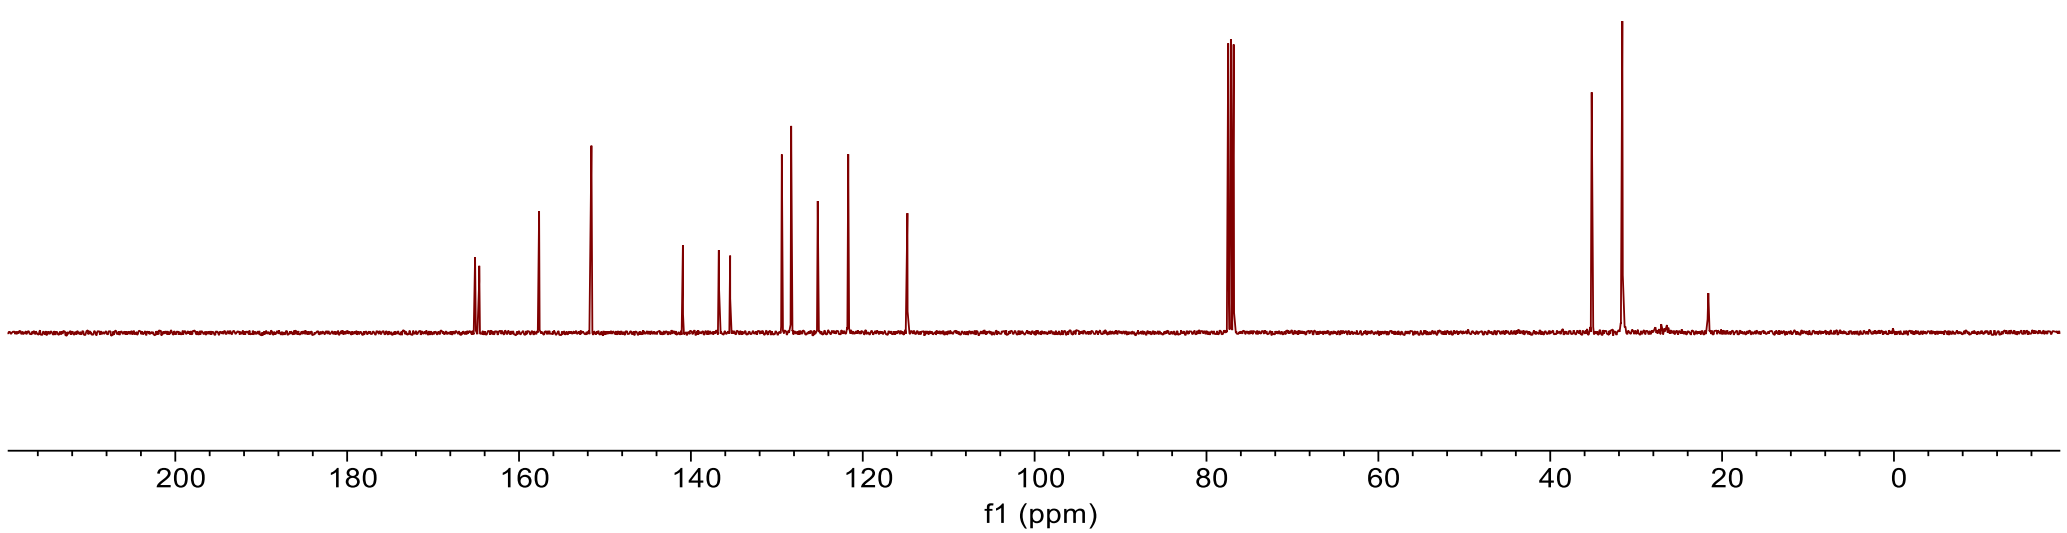

<sup>13</sup>C NMR Spectrum of **17n**



CDCl<sub>3</sub>, 400.13 MHz

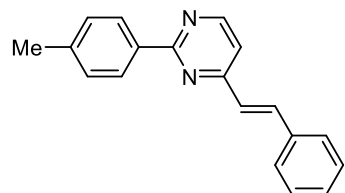

17o

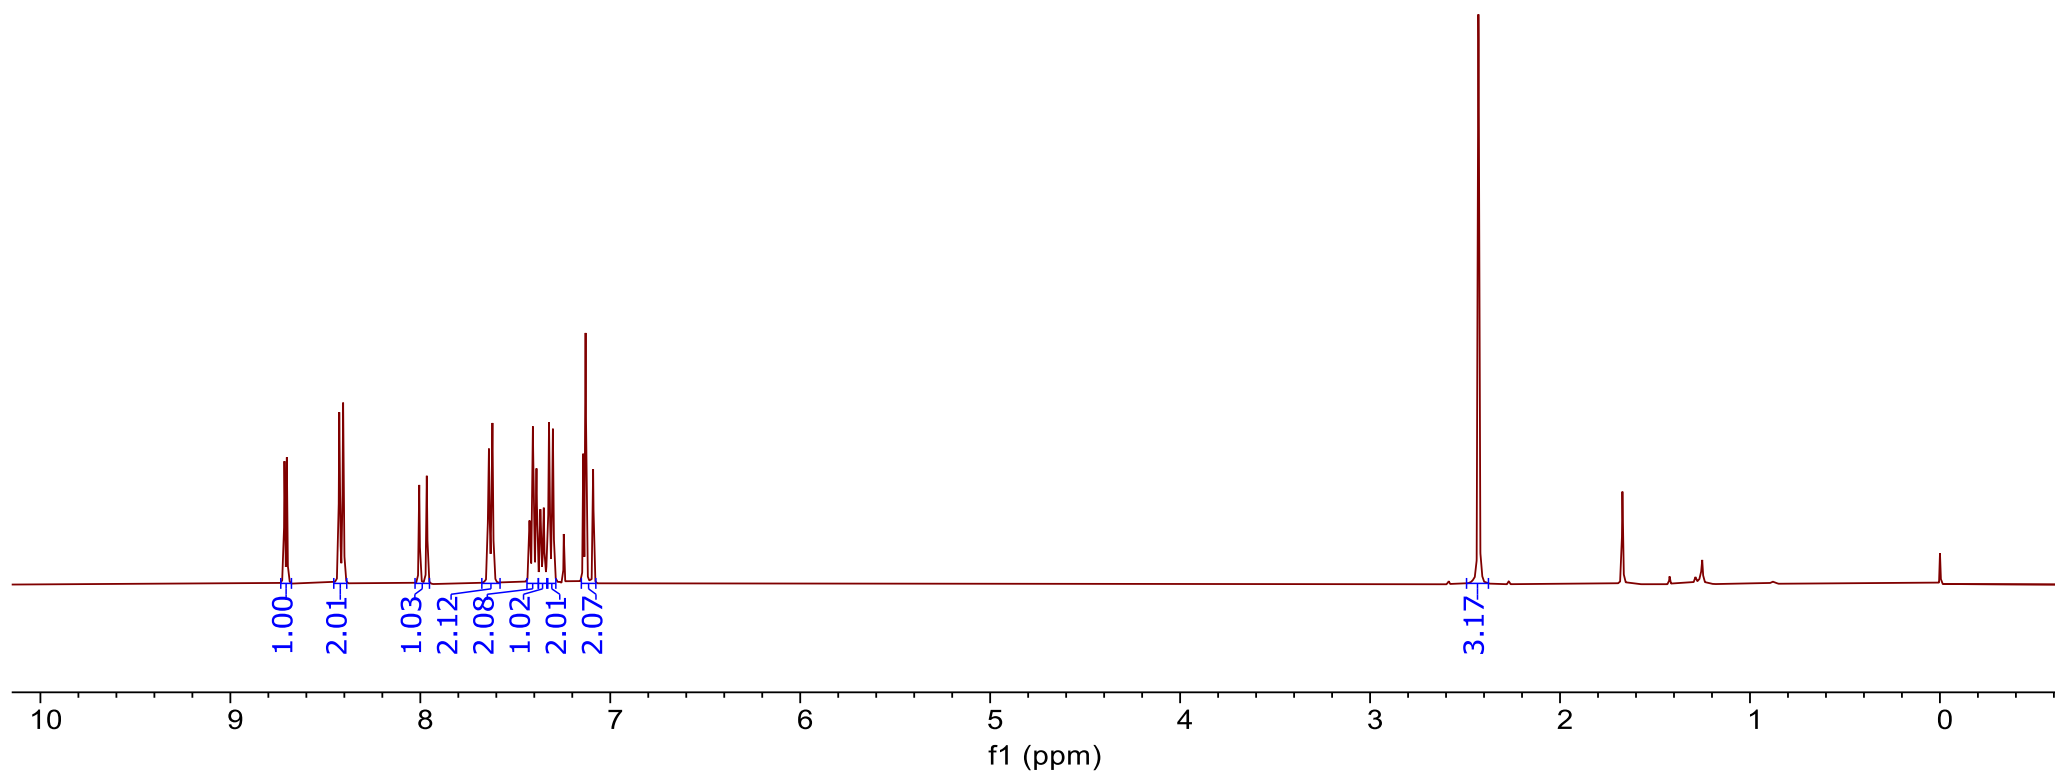

<sup>1</sup>H NMR Spectrum of 17o

CDCl<sub>3</sub>, 100.62 MHz

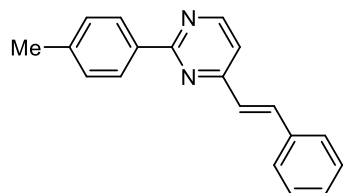

**17o**

164.63  
162.45  
157.76  
140.97  
137.04  
135.98  
135.34  
129.42  
129.40  
128.98  
128.34  
127.80  
126.45  
— 116.23

— 21.63

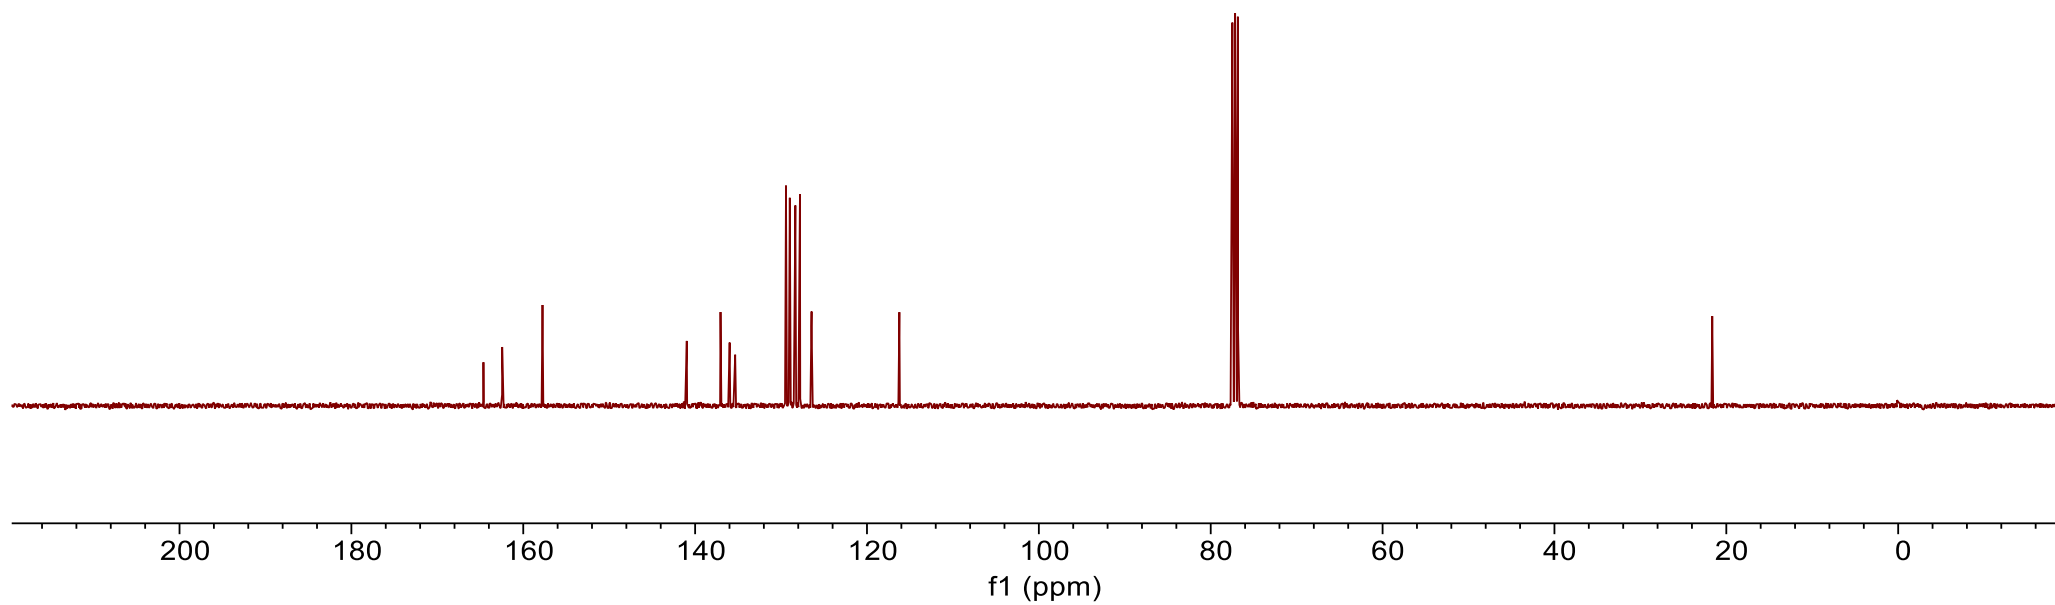

<sup>13</sup>C NMR Spectrum of **17o**

CDCl<sub>3</sub>, 400.13 MHz

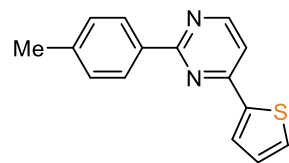

17p

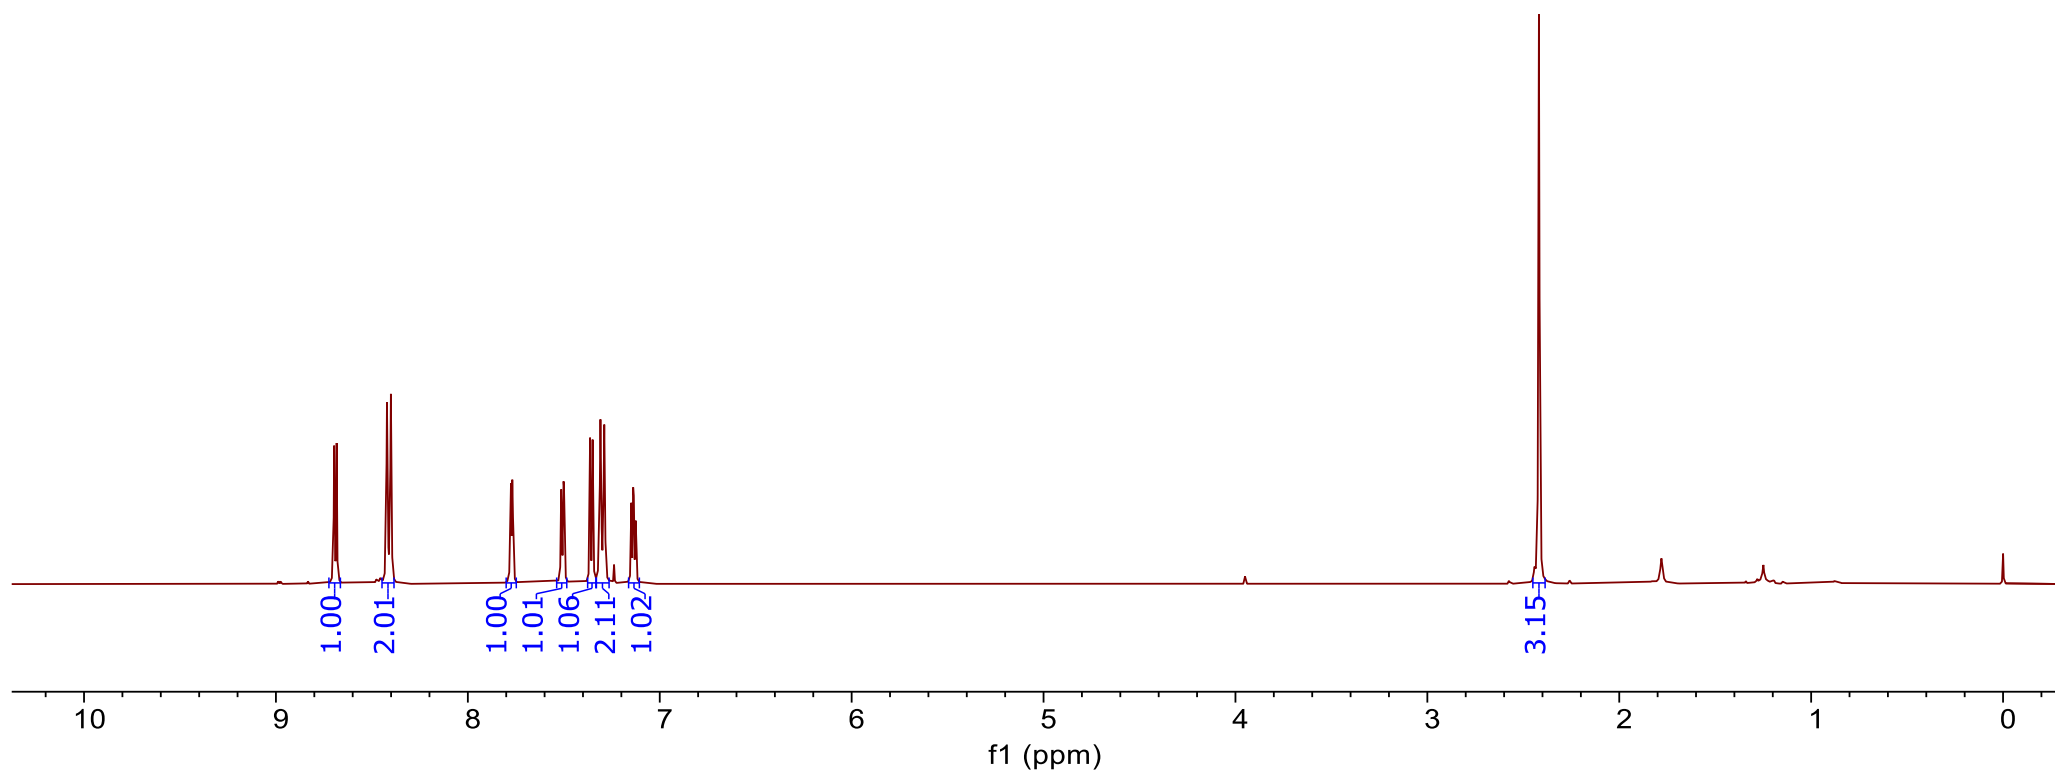

<sup>1</sup>H NMR Spectrum of 17p

0.00

CDCl<sub>3</sub>, 100.62 MHz

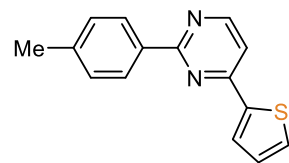

17p

164.70  
158.99  
157.61  
143.09  
141.15  
134.87  
130.13  
129.39  
128.42  
128.32  
127.40  
112.58

21.65  
21.60

21.65  
21.60

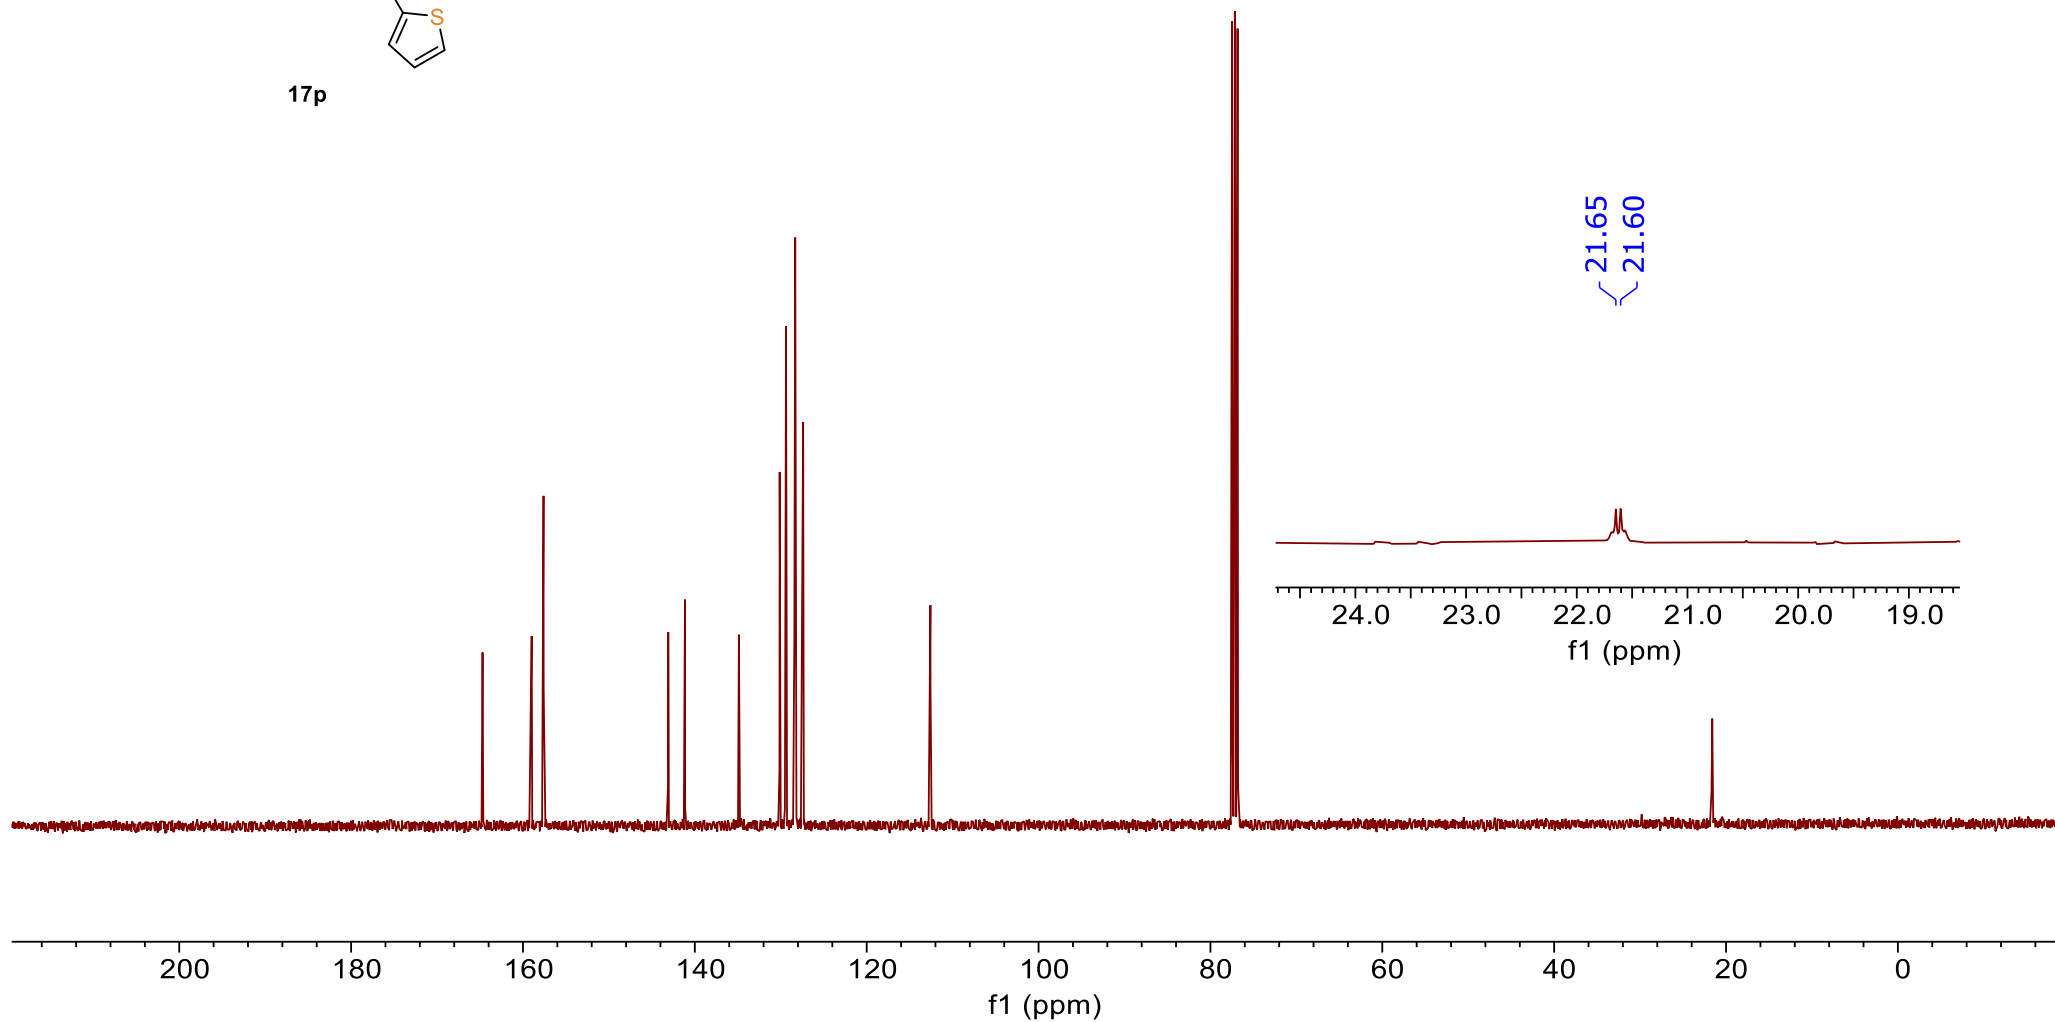

<sup>13</sup>C NMR Spectrum of 17p



CDCl<sub>3</sub>, 100.62 MHz

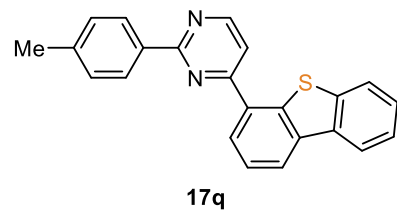

164.84  
163.08  
157.50  
141.99  
141.23  
137.99  
137.65  
135.25  
134.44  
131.05  
129.52  
128.96  
127.11  
125.91  
124.54  
124.41  
123.95  
122.63  
121.44  
114.61

21.71  
21.66

21.71  
21.66

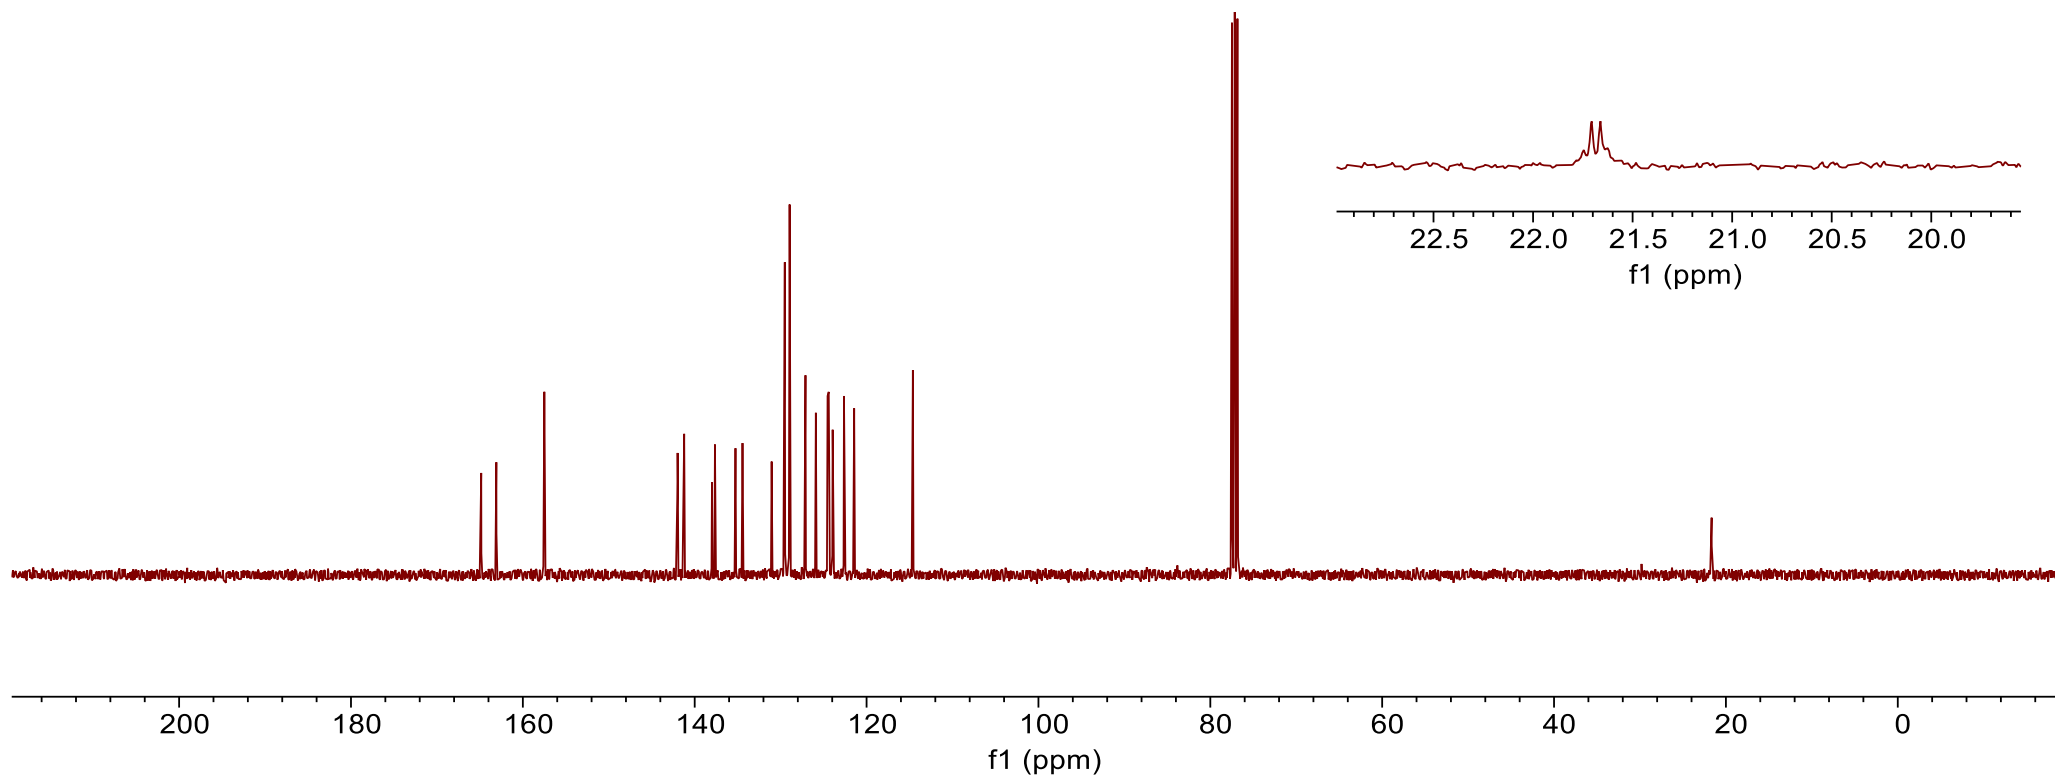

<sup>13</sup>C NMR Spectrum of **17q**

CDCl<sub>3</sub>, 400.13 MHz

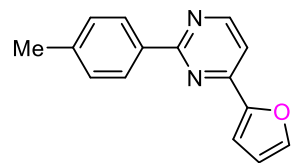

17r

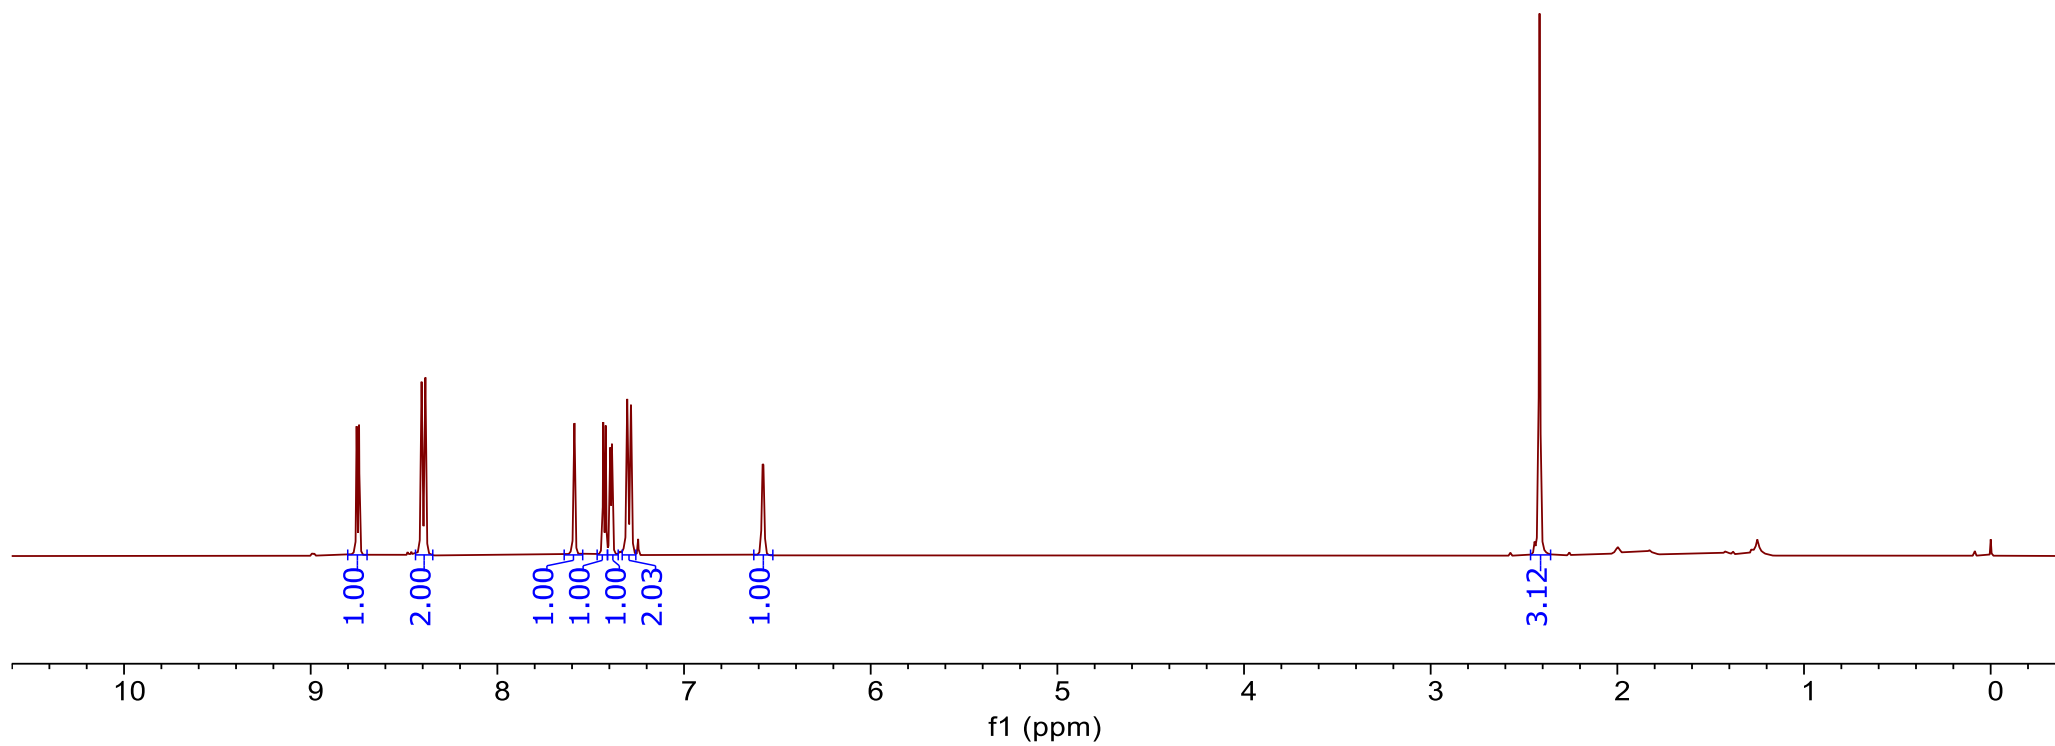

<sup>1</sup>H NMR Spectrum of 17r

CDCl<sub>3</sub>, 100.62 MHz

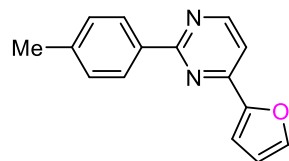

17r

164.65  
157.83  
155.59  
152.35  
145.04  
141.05  
135.04  
129.37  
128.28  
112.57  
112.34  
112.24

112.57  
112.34  
112.24

21.61  
21.58

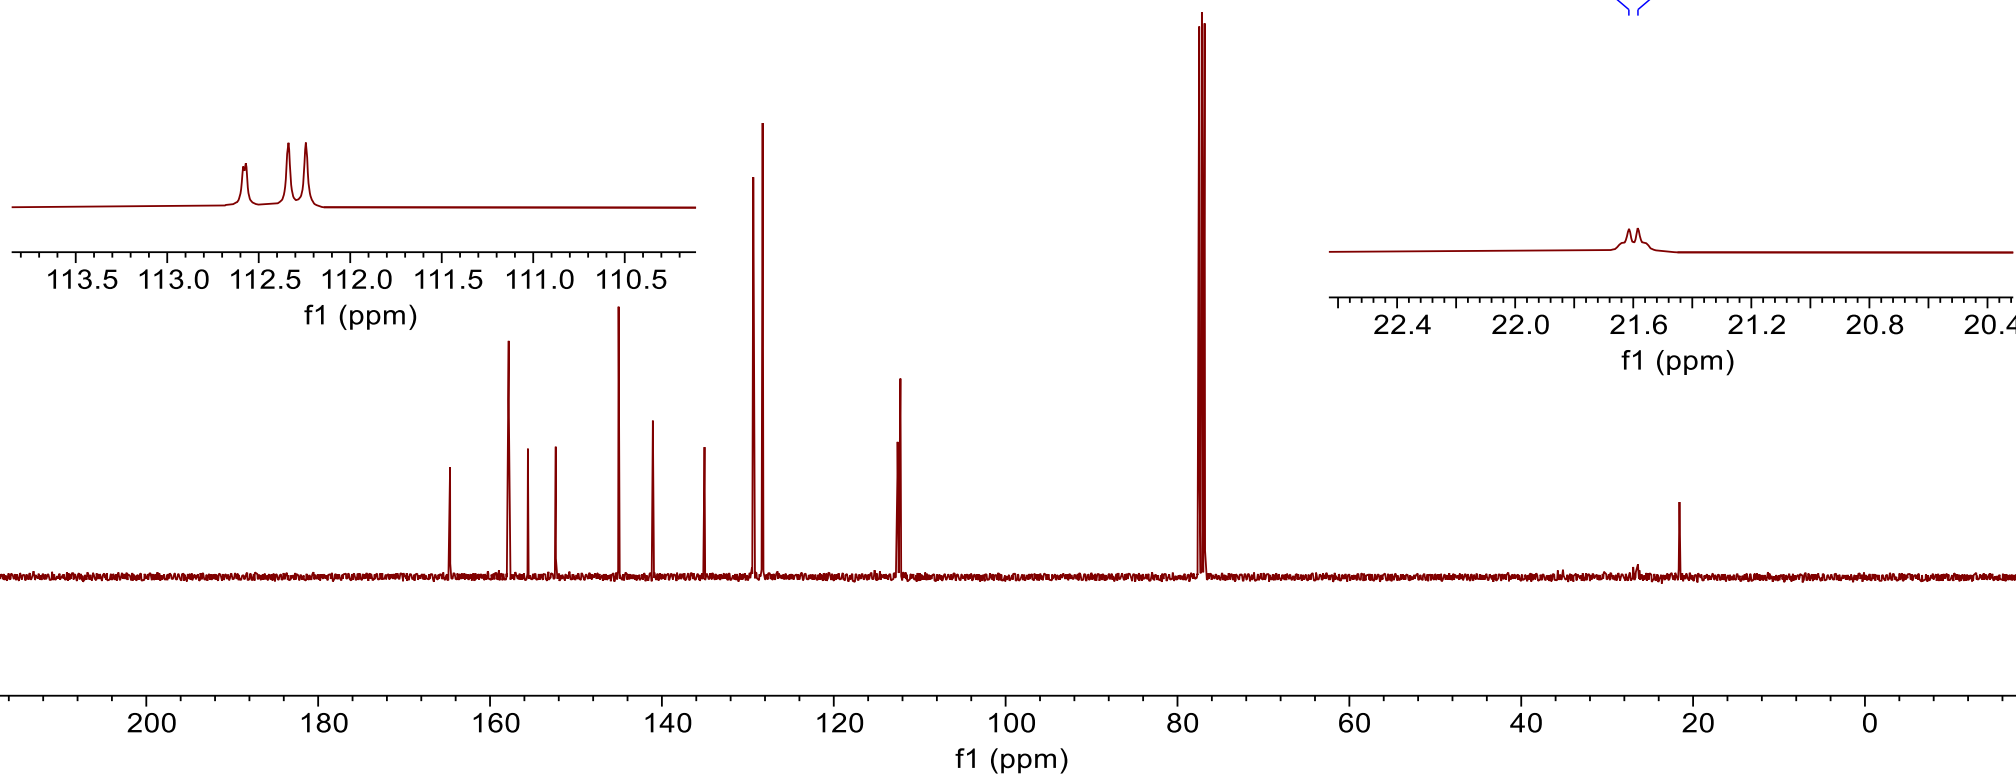

<sup>13</sup>C NMR Spectrum of 17r



CDCl<sub>3</sub>, 400.13 MHz

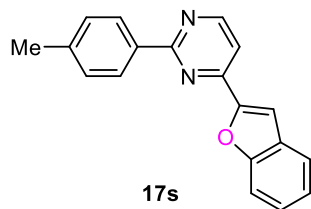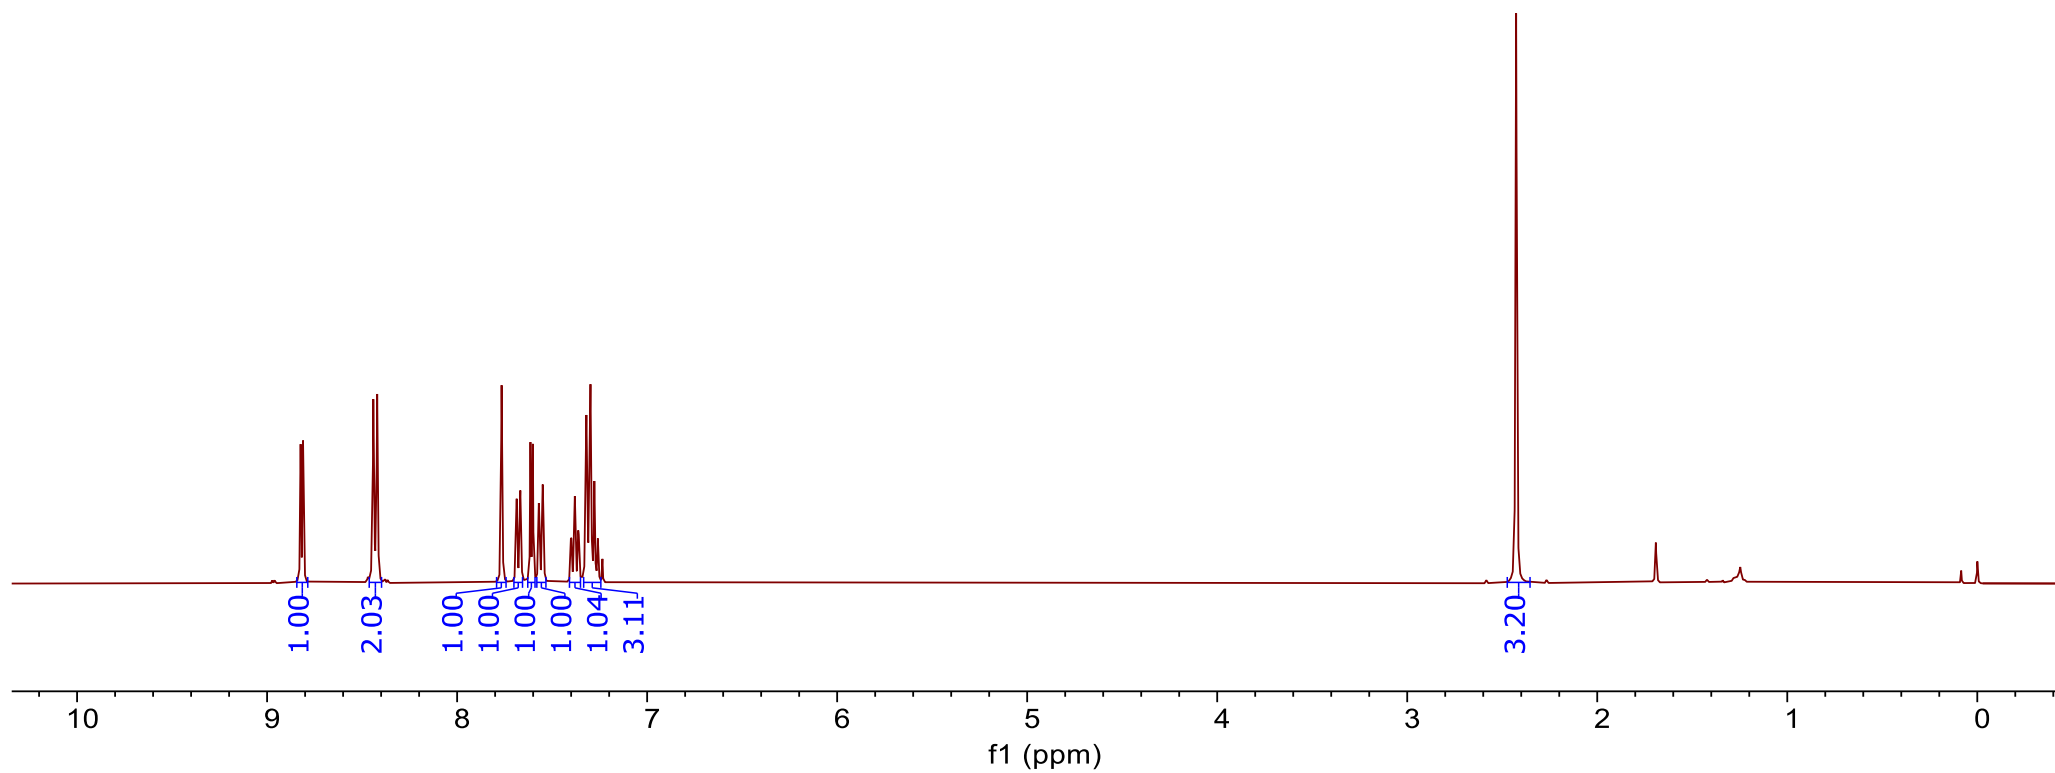

<sup>1</sup>H NMR Spectrum of 17s

CDCl<sub>3</sub>, 100.62 MHz

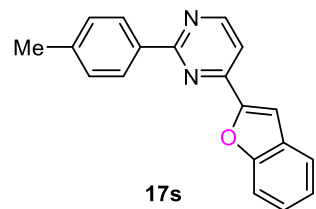

164.79  
158.25  
155.88  
155.82  
153.69  
141.23  
134.93  
129.43  
128.47  
128.36  
126.40  
123.64  
122.38  
113.27  
111.84  
108.31

21.66  
21.63

21.66  
21.63

22.8 22.4 22.0 21.6 21.2 20.8 20.4  
f1 (ppm)

200 180 160 140 120 100 80 60 40 20 0

<sup>13</sup>C NMR Spectrum of 17s

CDCl<sub>3</sub>, 400.13 MHz

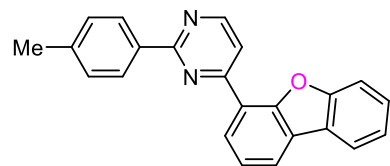

17t

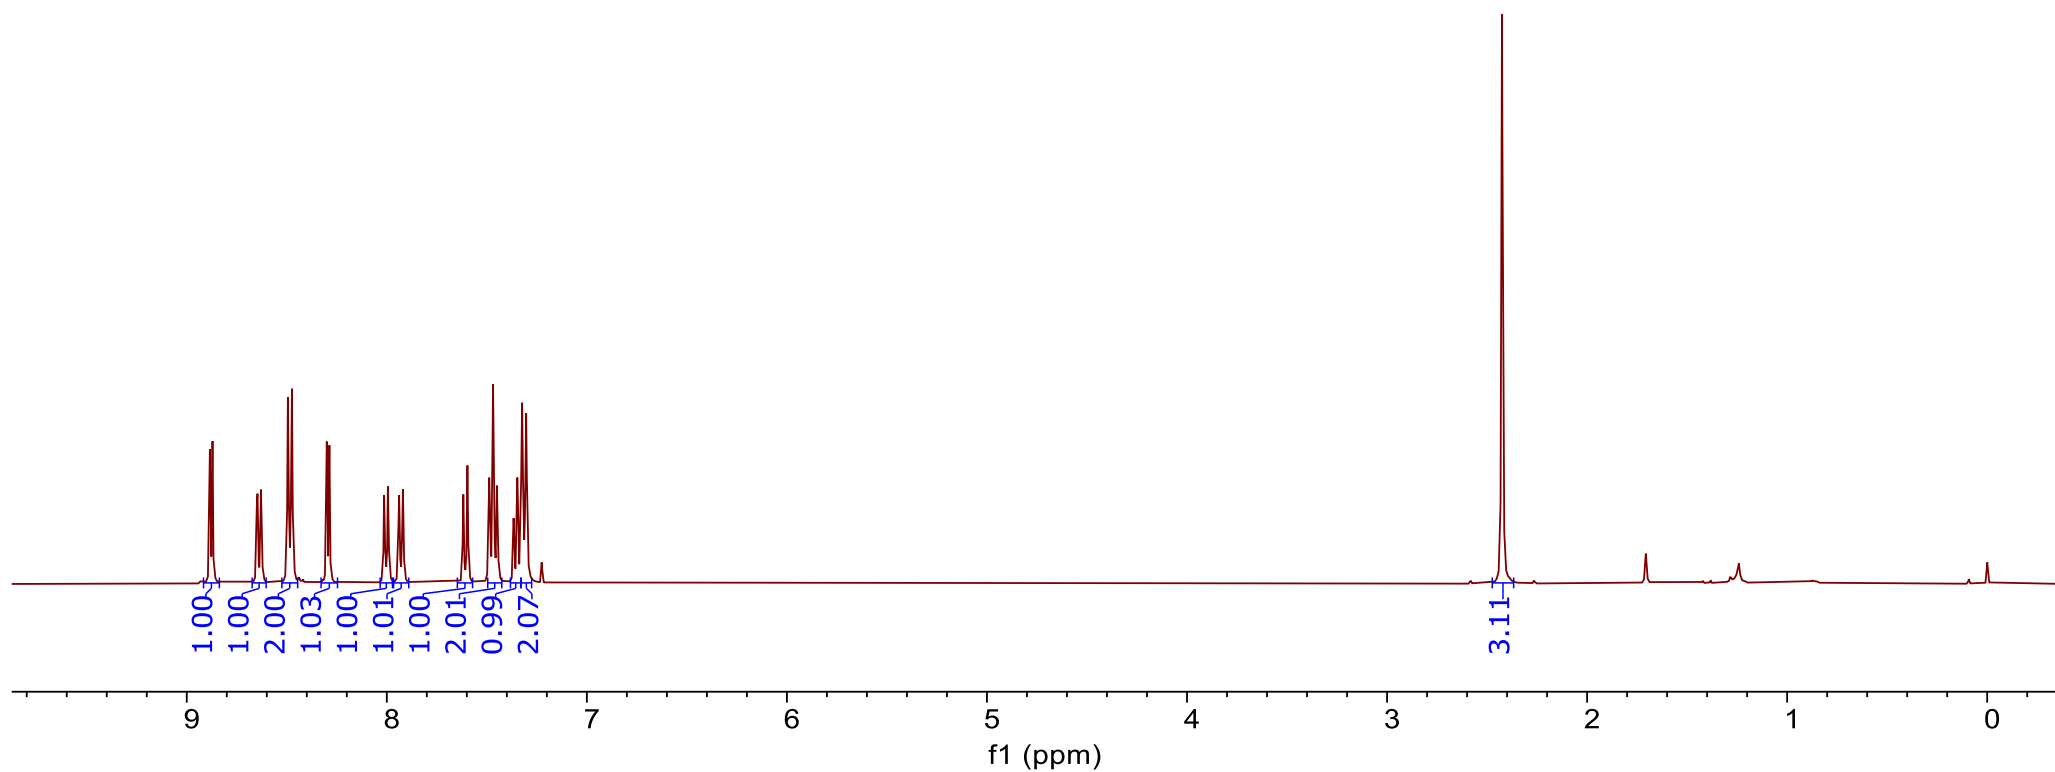

<sup>1</sup>H NMR Spectrum of 17t

CDCl<sub>3</sub>, 100.62 MHz

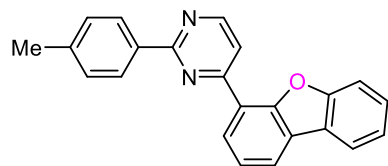

17t

164.51  
160.13  
158.02  
156.08  
154.60  
140.97  
135.39  
129.41  
128.32  
127.63  
127.35  
125.47  
123.69  
123.31  
123.18  
121.88  
120.80  
118.22  
111.86

21.65  
21.62

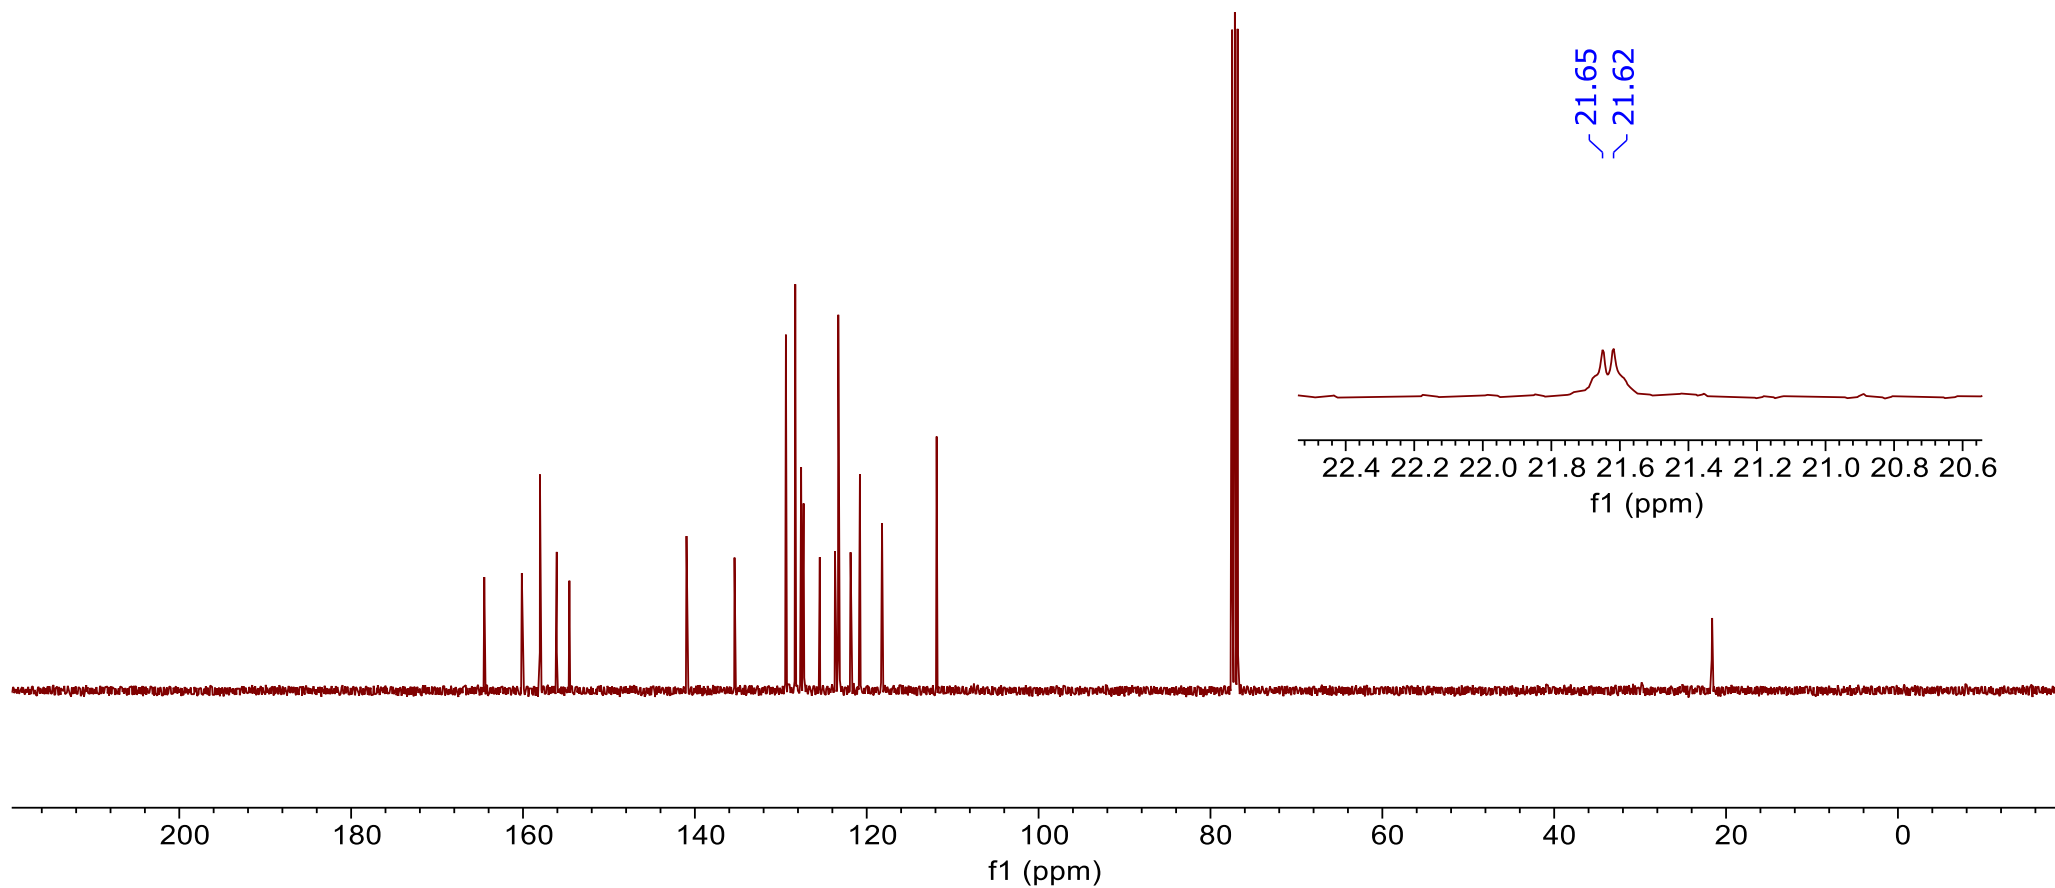

<sup>13</sup>C NMR Spectrum of 17t

CDCl<sub>3</sub>, 400.13 MHz

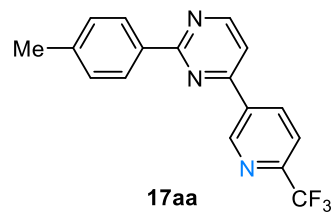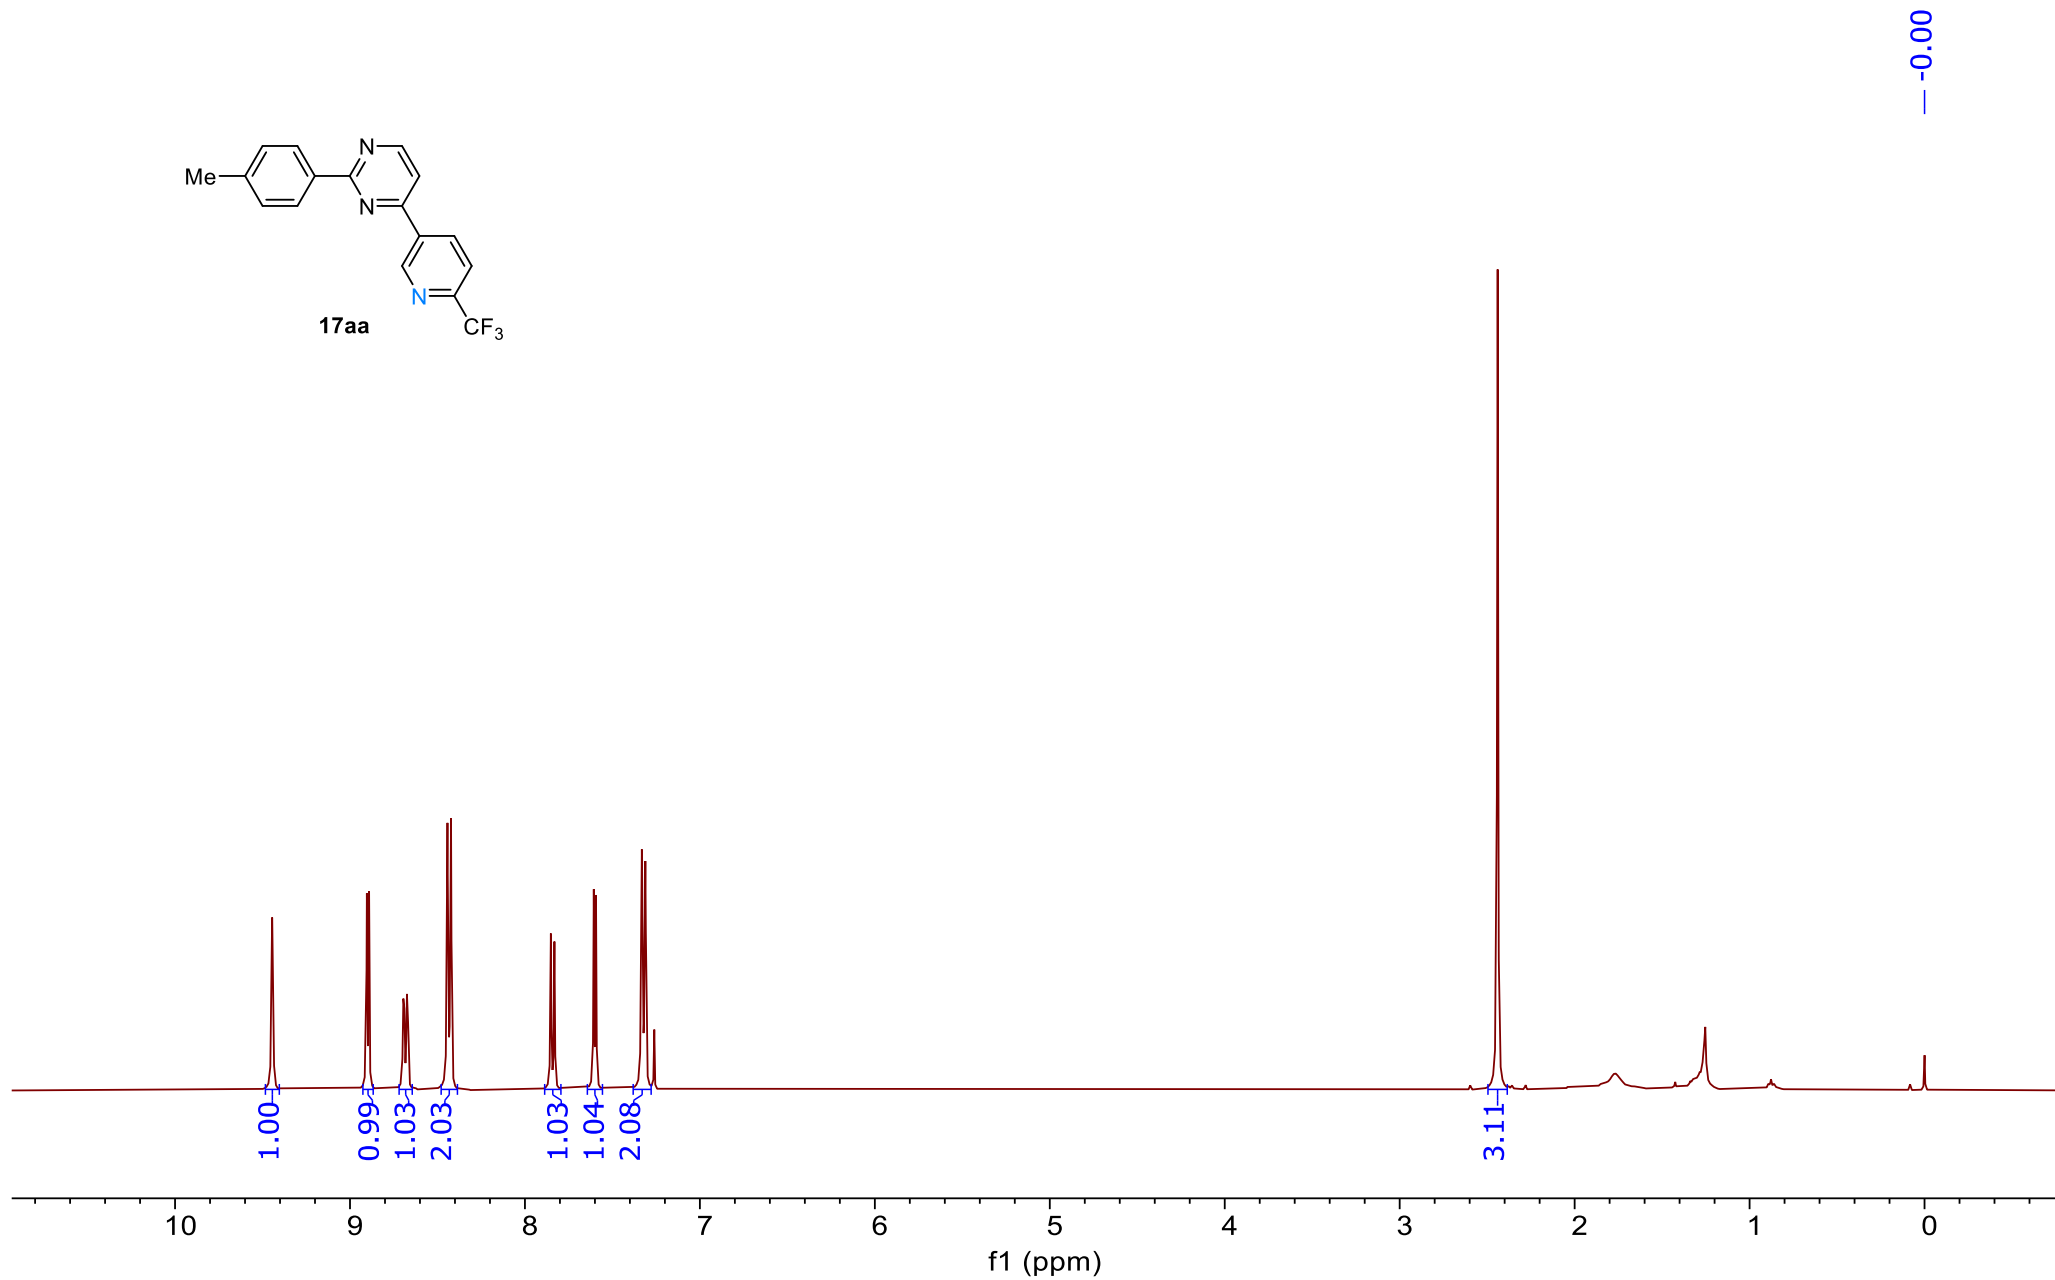

— 0.00

<sup>1</sup>H NMR Spectrum of 17aa

CDCl<sub>3</sub>, 100.62 MHz

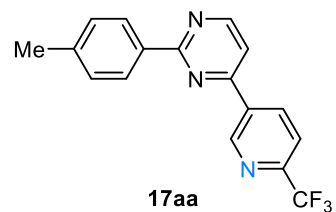

165.30  
160.14  
158.70  
150.27  
149.90  
149.56  
149.21  
148.81  
141.77  
136.23  
135.52  
134.53  
129.58  
128.42  
122.90  
120.71  
120.68  
120.17  
114.70

21.66  
21.63

21.66  
21.63

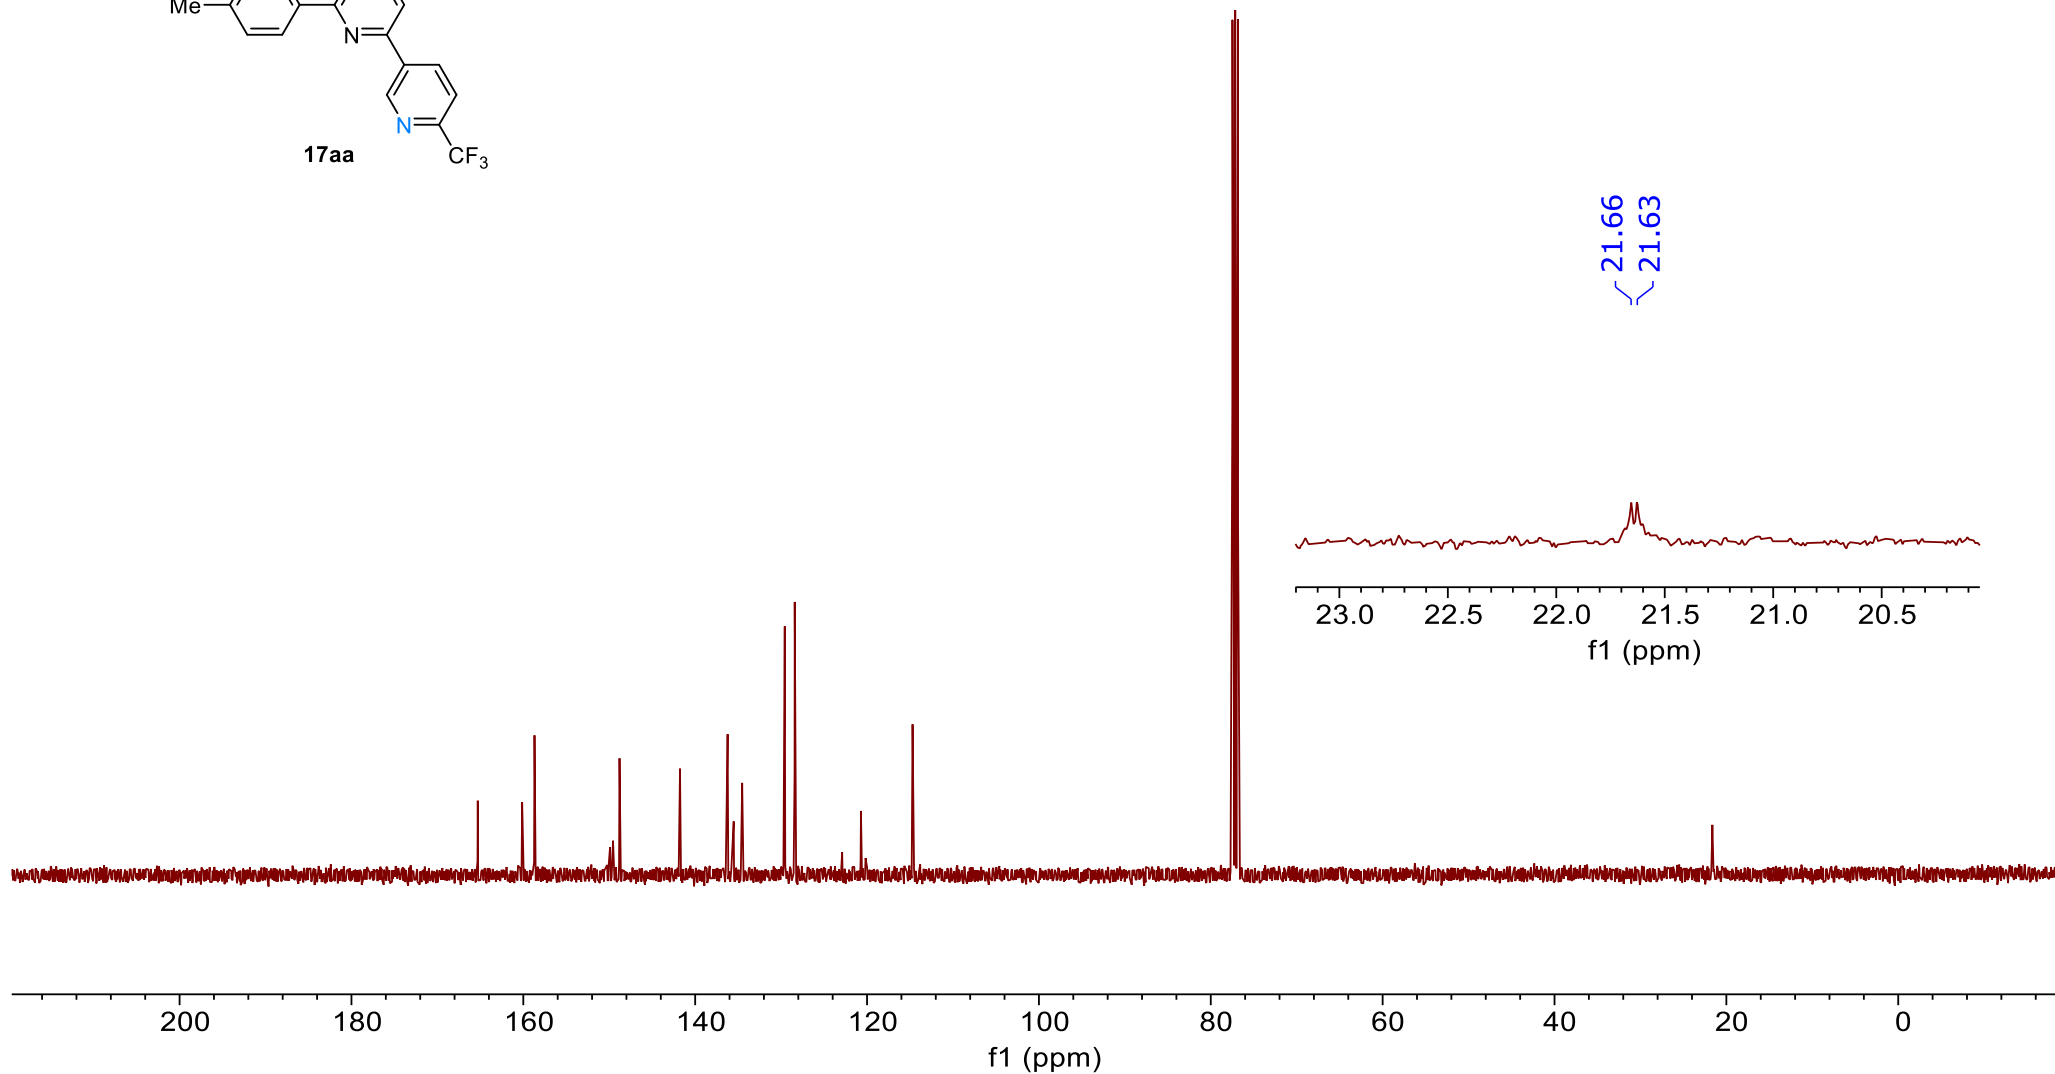

<sup>13</sup>C NMR Spectrum of **17aa**

CDCl<sub>3</sub>, 376.46 MHz

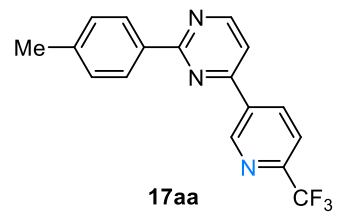

**17aa**

-67.96

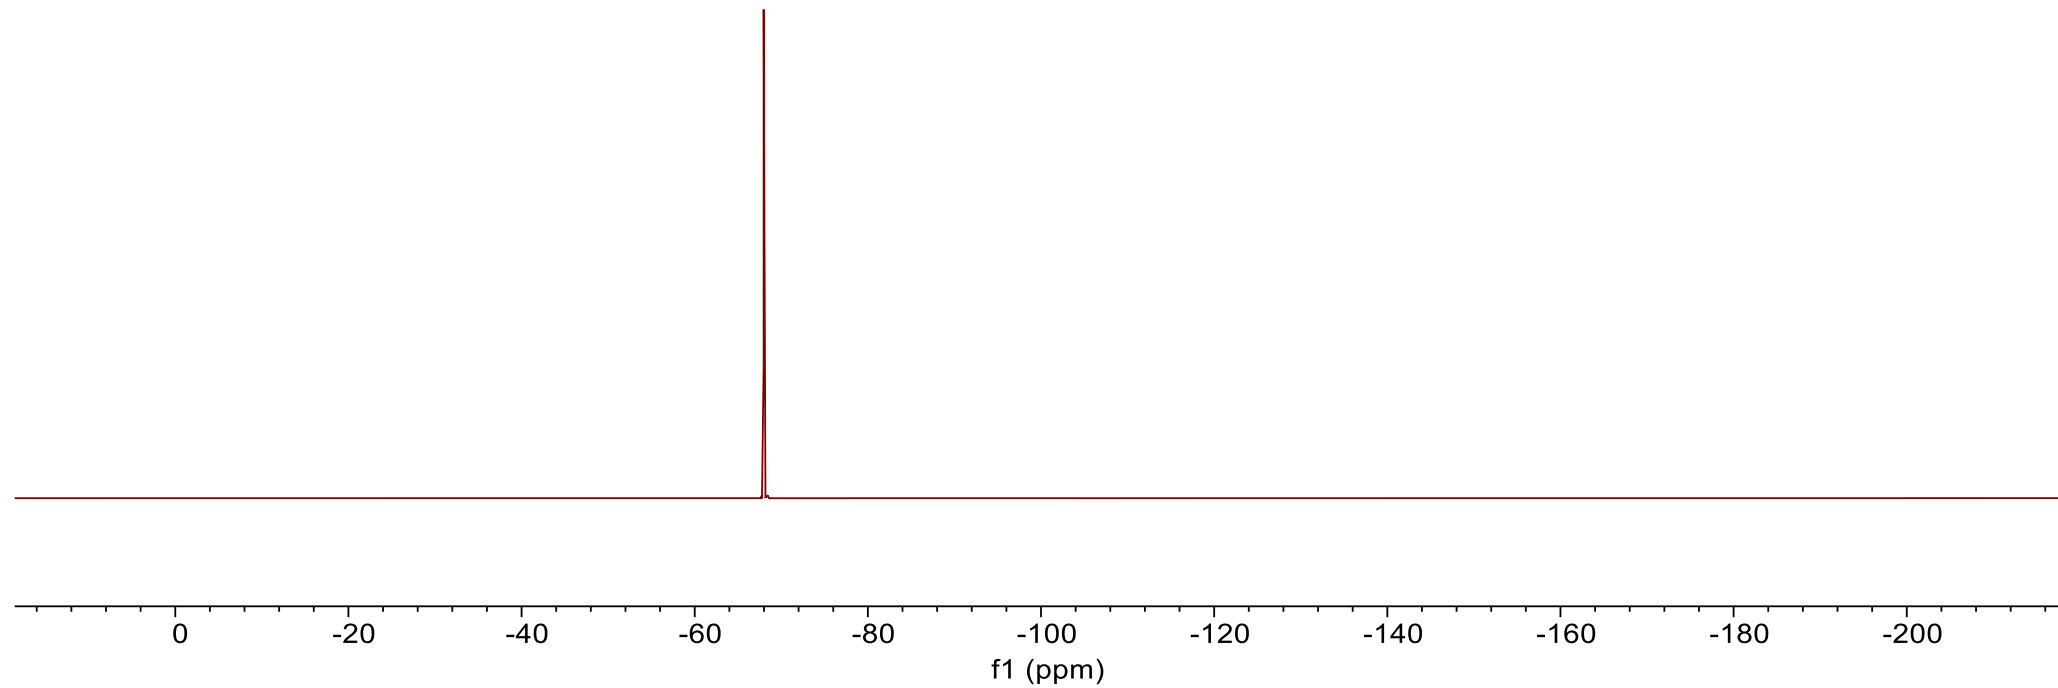

<sup>19</sup>F NMR Spectrum of **17aa**

CDCl<sub>3</sub>, 400.13 MHz

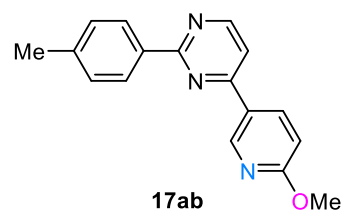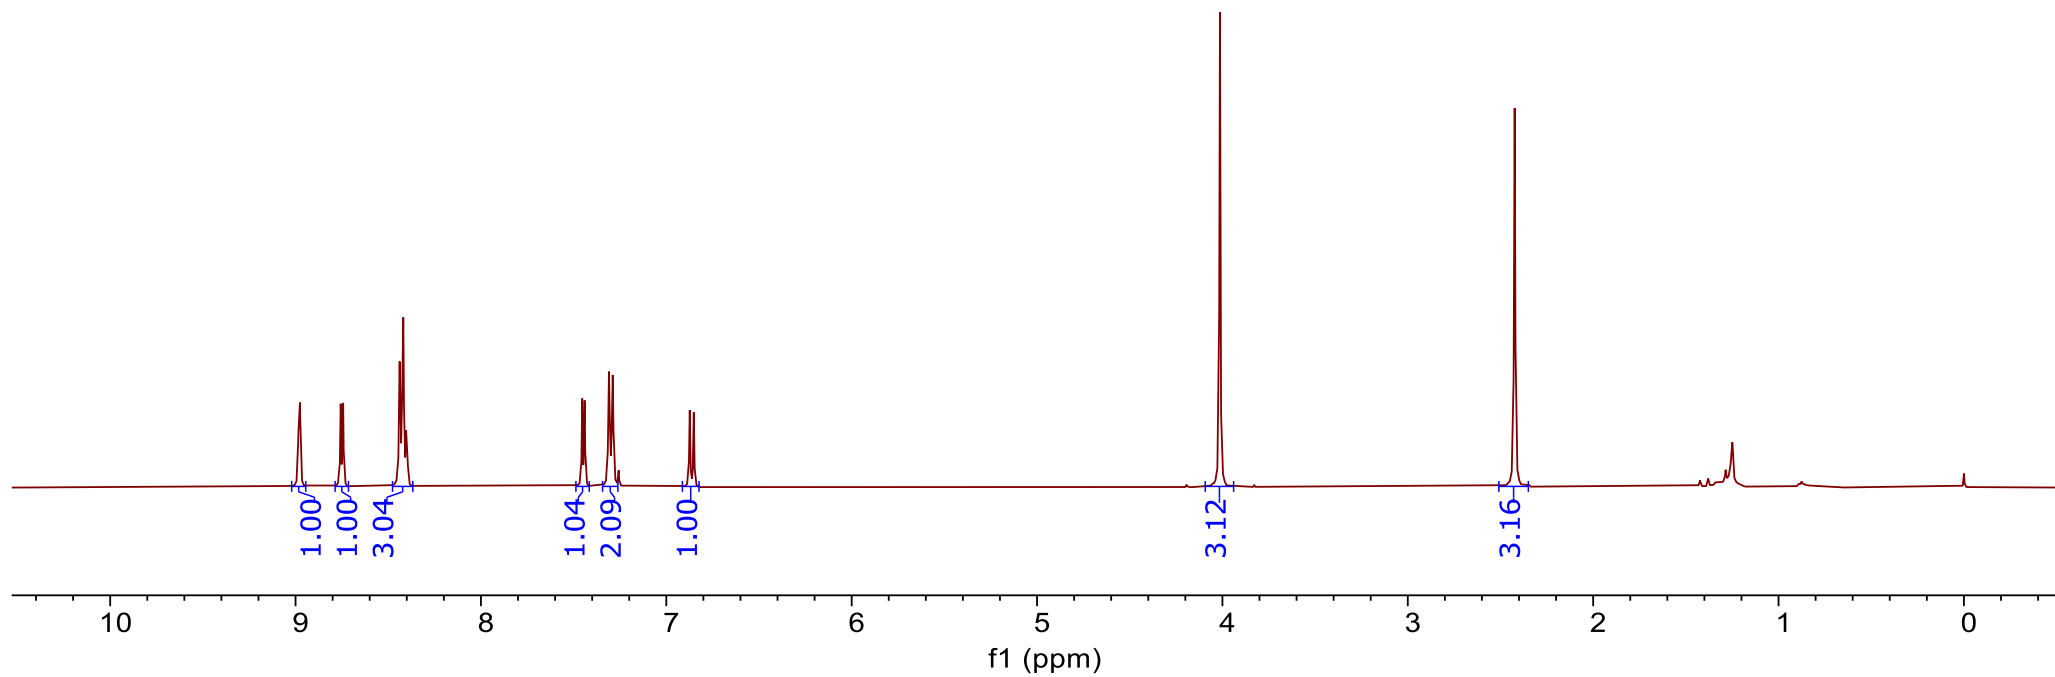

<sup>1</sup>H NMR Spectrum of **17ab**

00:00



CDCl<sub>3</sub>, 100.62 MHz

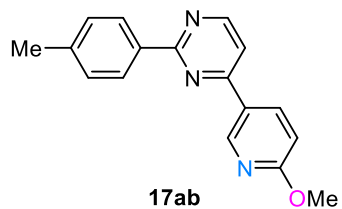

165.96  
164.74  
161.61  
157.84  
146.70  
141.16  
137.38  
135.09  
129.41  
128.31  
126.28  
113.32  
111.24

53.97  
53.93

21.62  
21.59

53.97  
53.93

21.62  
21.59

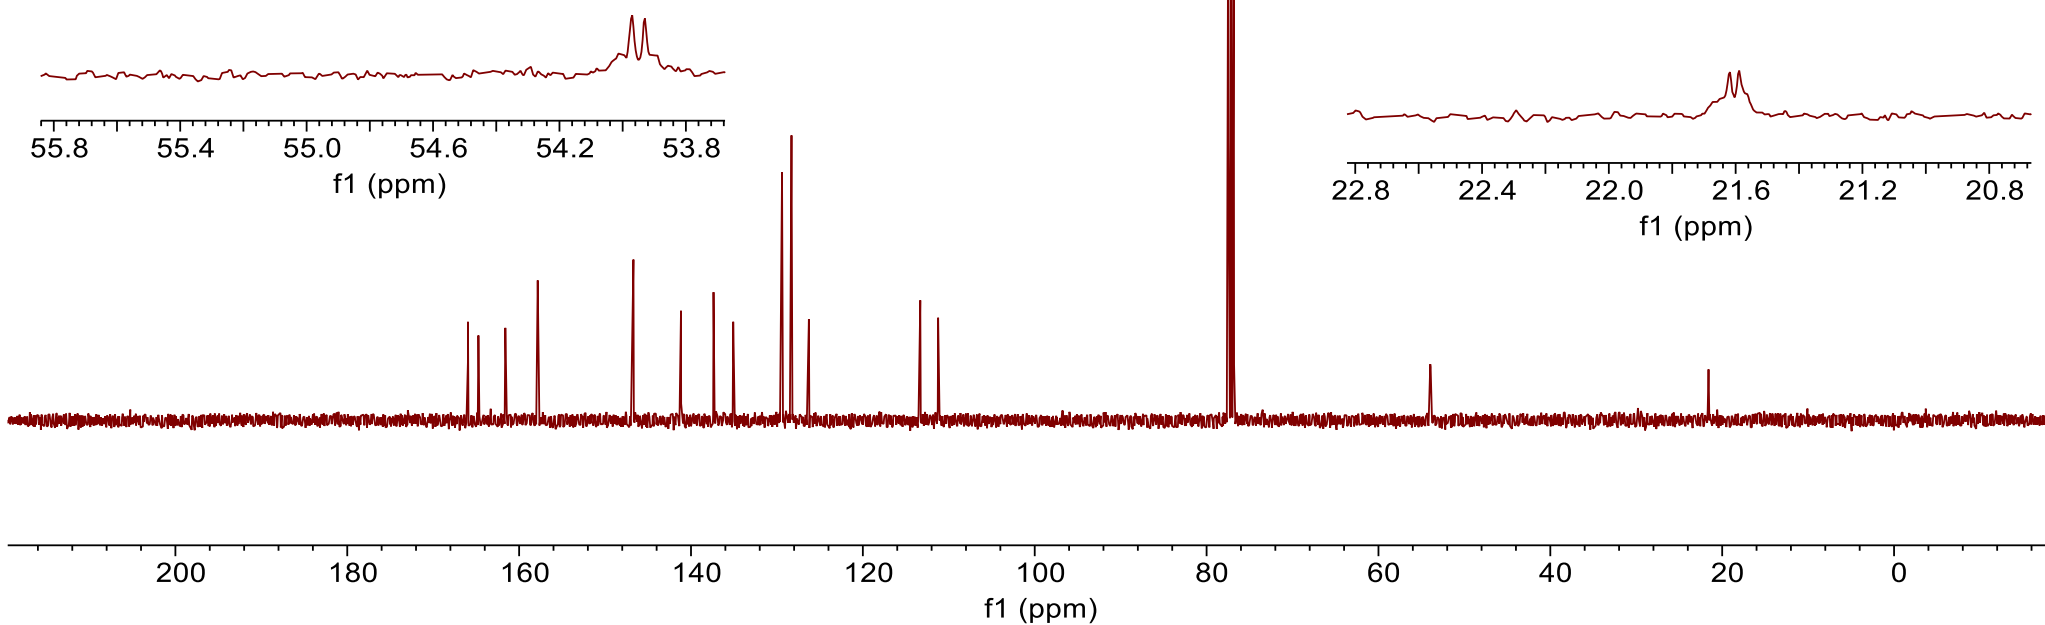

<sup>13</sup>C NMR Spectrum of **17ab**

CDCl<sub>3</sub>, 400.13 MHz

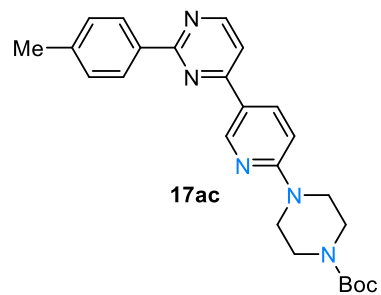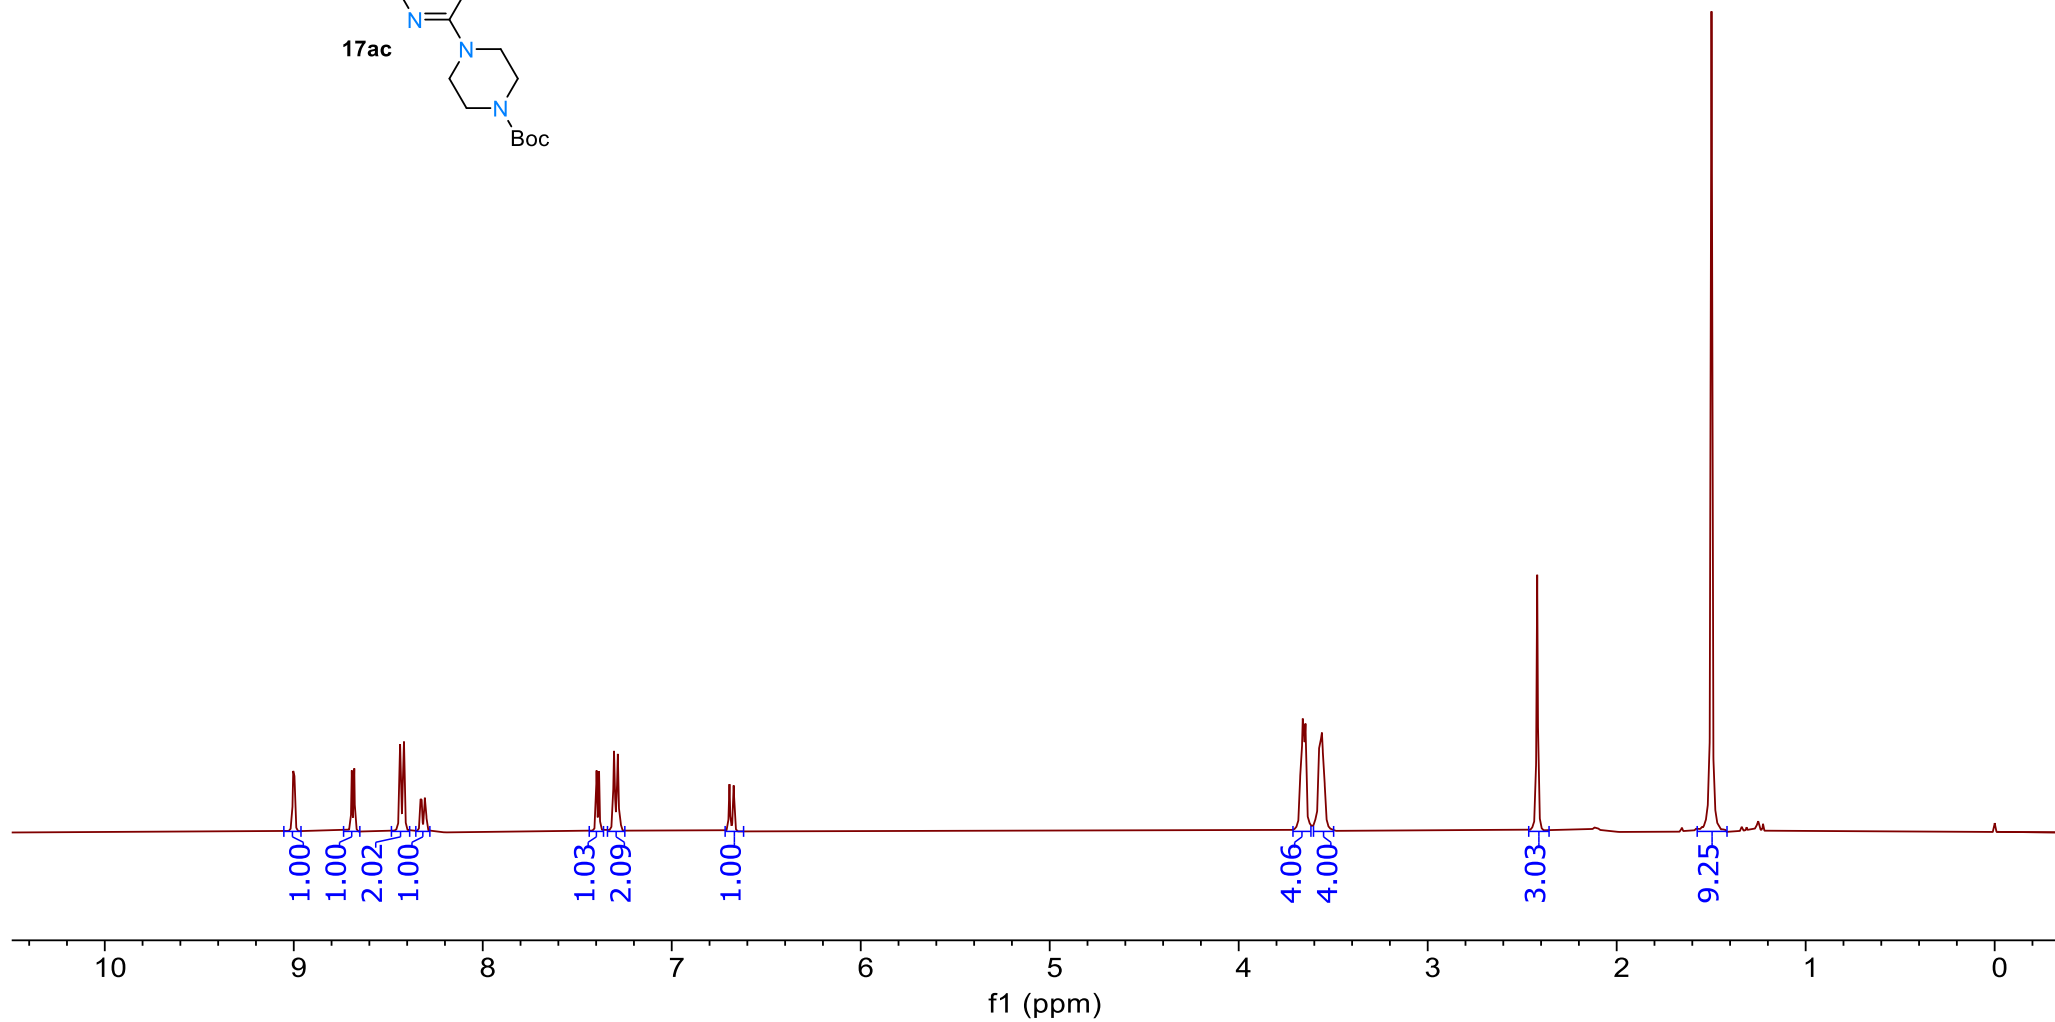

<sup>1</sup>H NMR Spectrum of **17ac**

CDCl<sub>3</sub>, 100.62 MHz

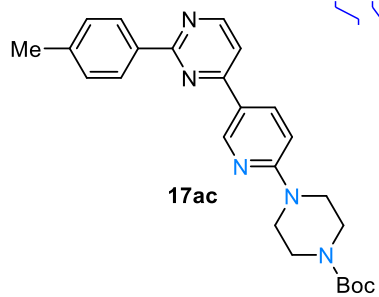

- 164.48
- 161.80
- 159.99
- 157.43
- 154.82
- 147.82
- 140.89
- 136.22
- 135.29
- 129.30
- 128.22
- 121.99
- 112.55
- 106.31
- 80.15
- 44.69
- 43.30
- 28.49
- 21.57
- 21.54

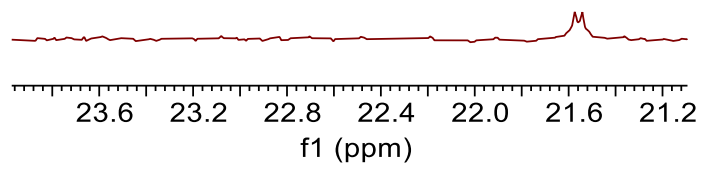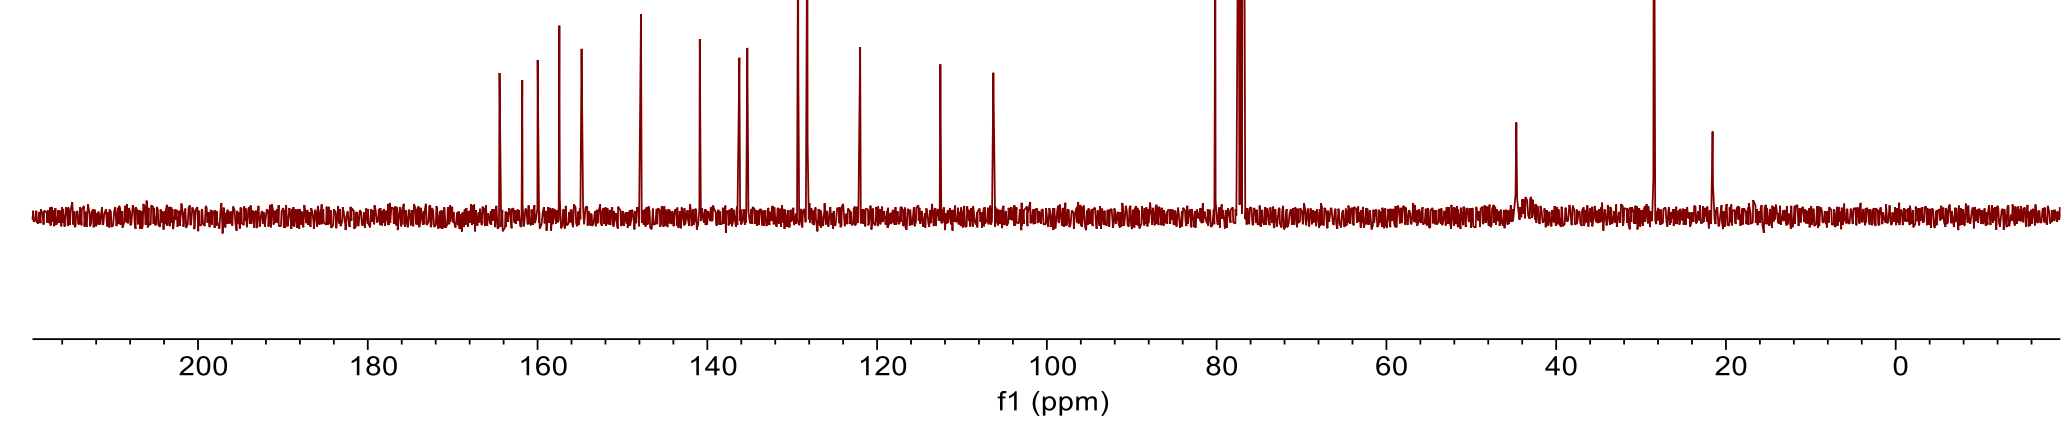

<sup>13</sup>C NMR Spectrum of 17ac

CDCl<sub>3</sub>, 400.13 MHz

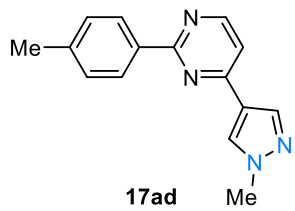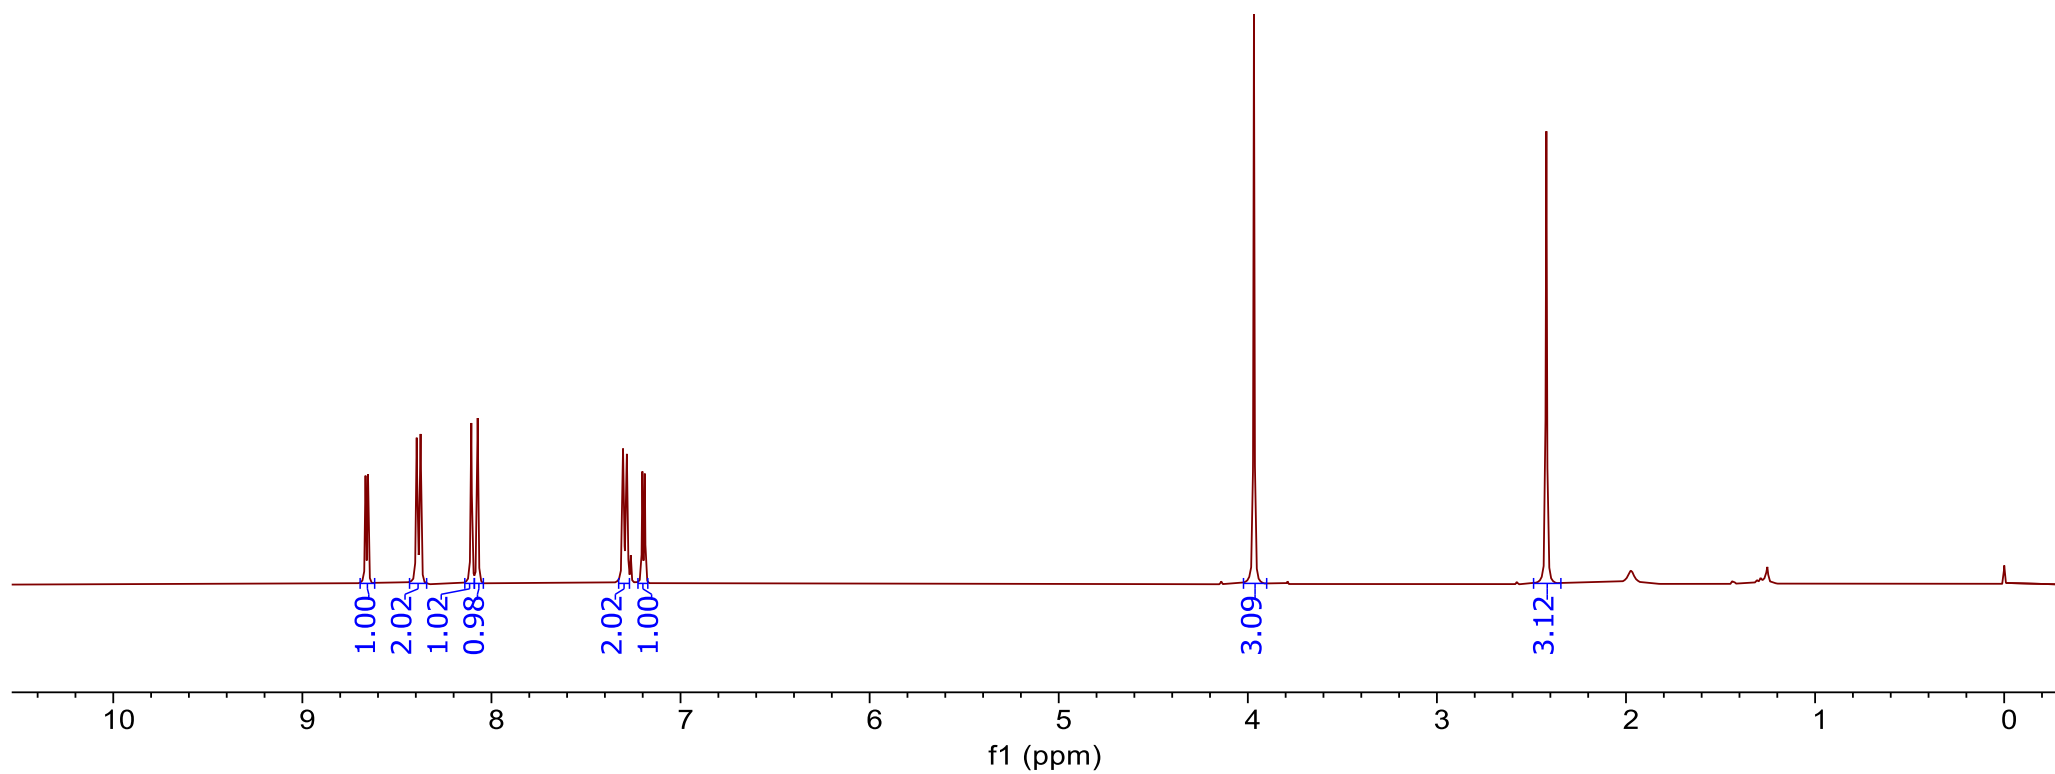

00.00

CDCl<sub>3</sub>, 100.62 MHz

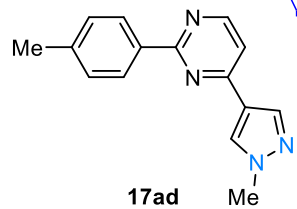

164.71  
158.81  
157.36  
140.93  
138.52  
135.23  
130.38  
129.33  
128.20  
122.10  
113.56

39.44  
39.40

21.60  
21.56

39.44  
39.40

21.60  
21.56

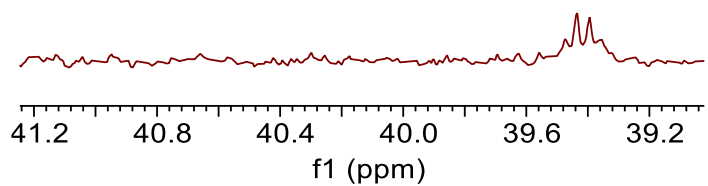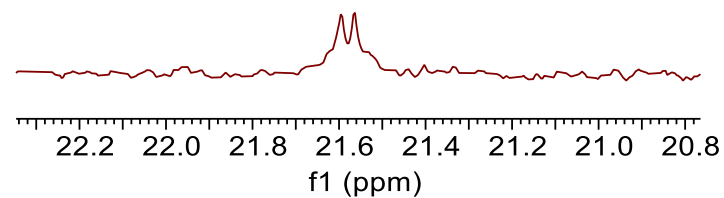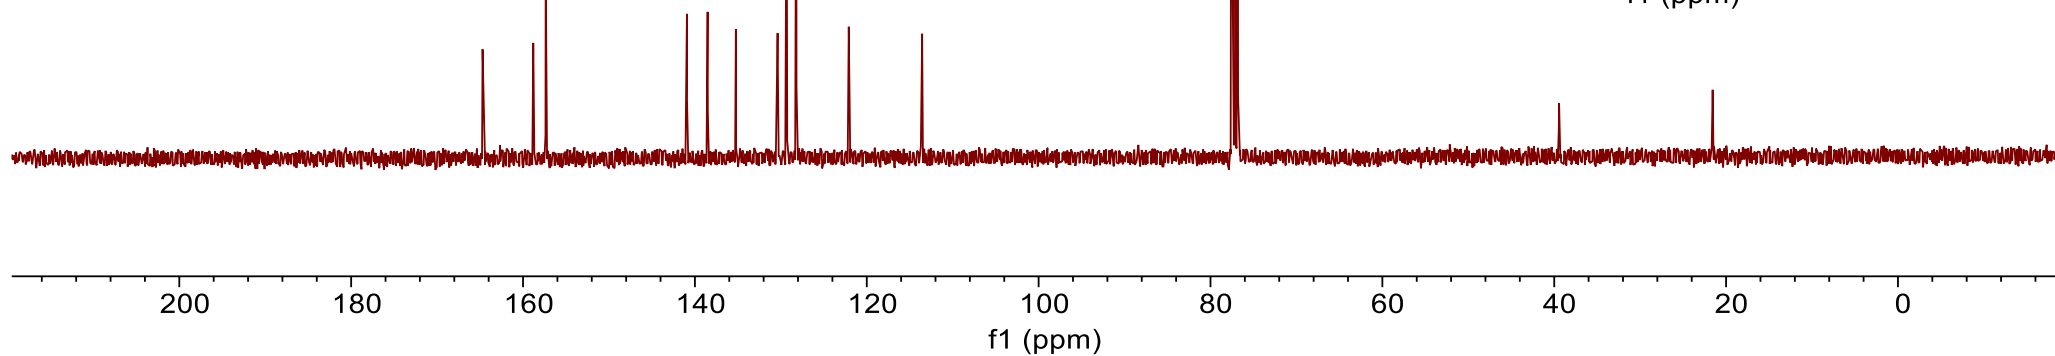

<sup>13</sup>C NMR Spectrum of 17ad

CDCl<sub>3</sub>, 400.13 MHz

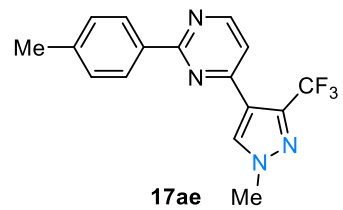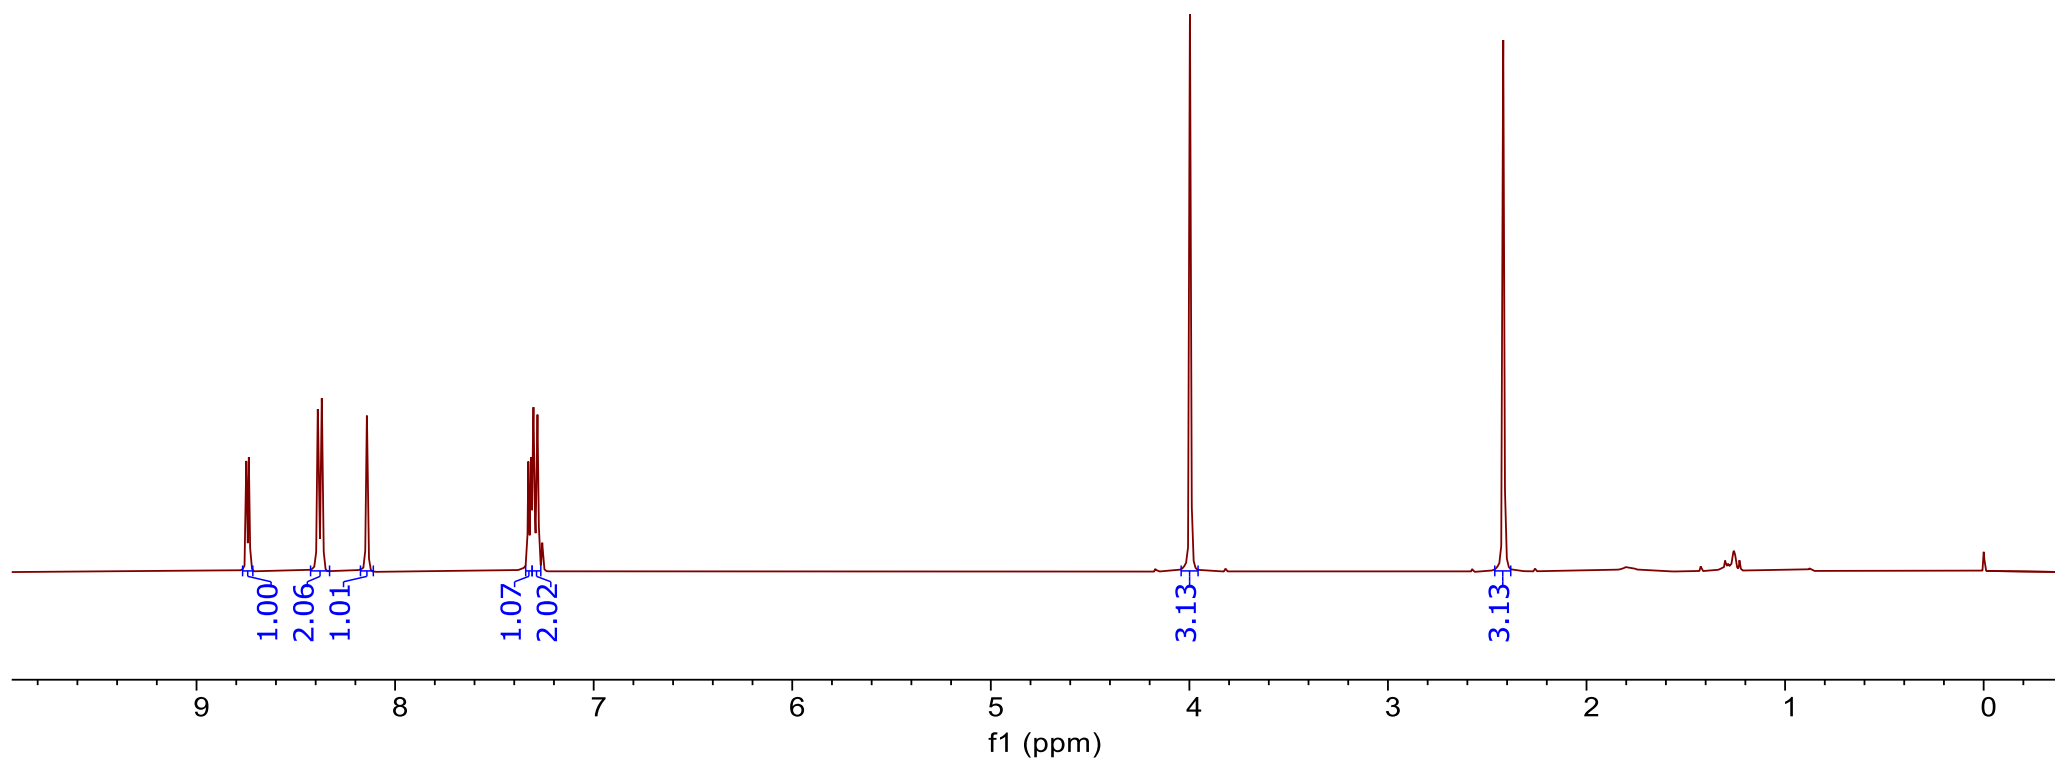

— -0.00

CDCl<sub>3</sub>, 100.62 MHz

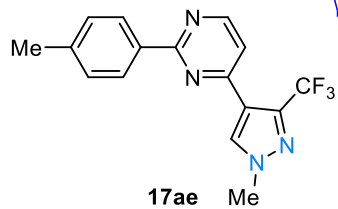

164.74  
157.98  
156.76  
141.22  
139.93  
139.56  
139.19  
138.73  
134.94  
133.76  
129.42  
128.27  
125.44  
122.76  
120.45  
120.09  
115.43  
115.40

39.90

21.59

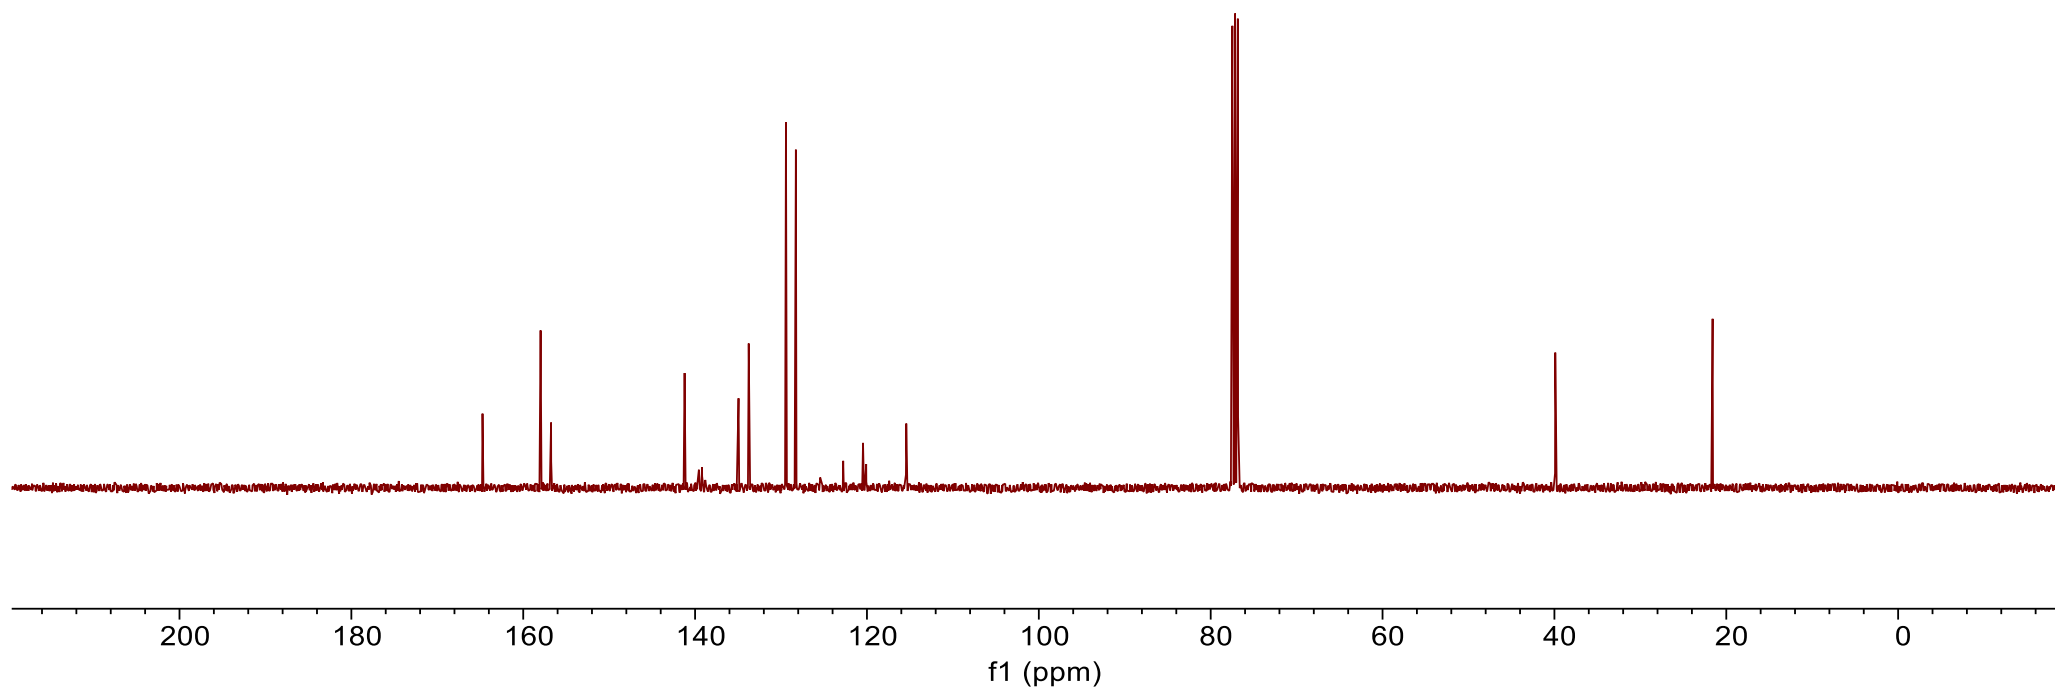

<sup>13</sup>C NMR Spectrum of **17ae**

CDCl<sub>3</sub>, 376.46 MHz

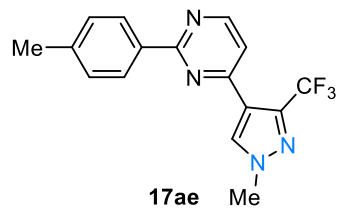

— -60.37

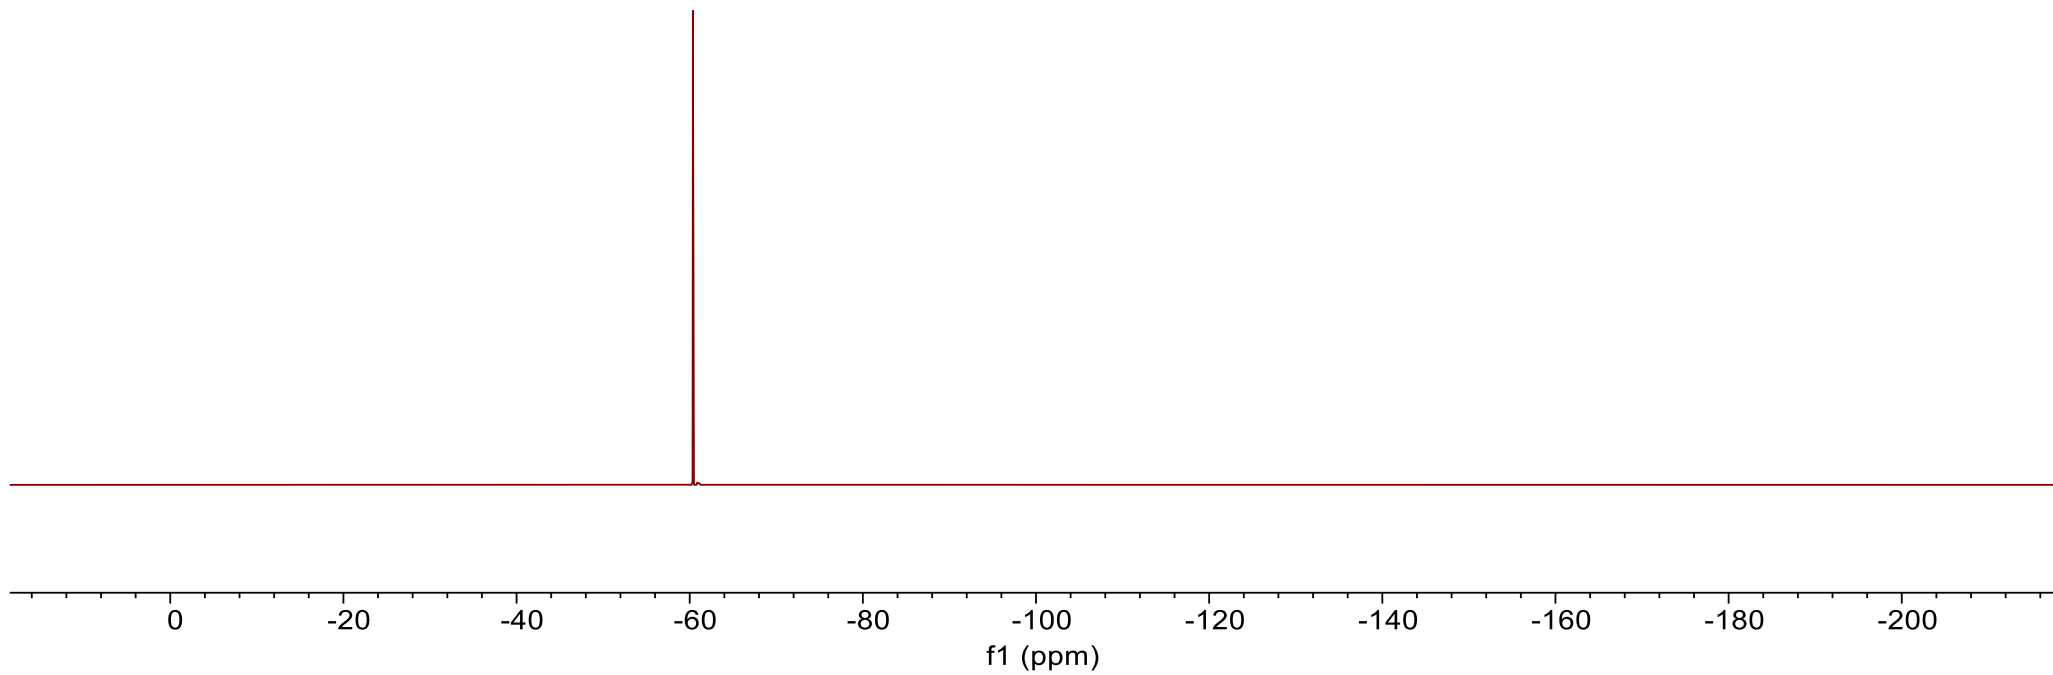

<sup>19</sup>F NMR Spectrum of **17ae**



CDCl<sub>3</sub>, 400.13 MHz

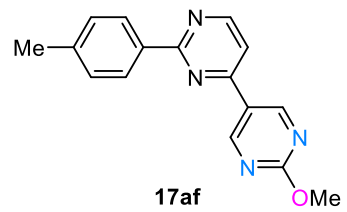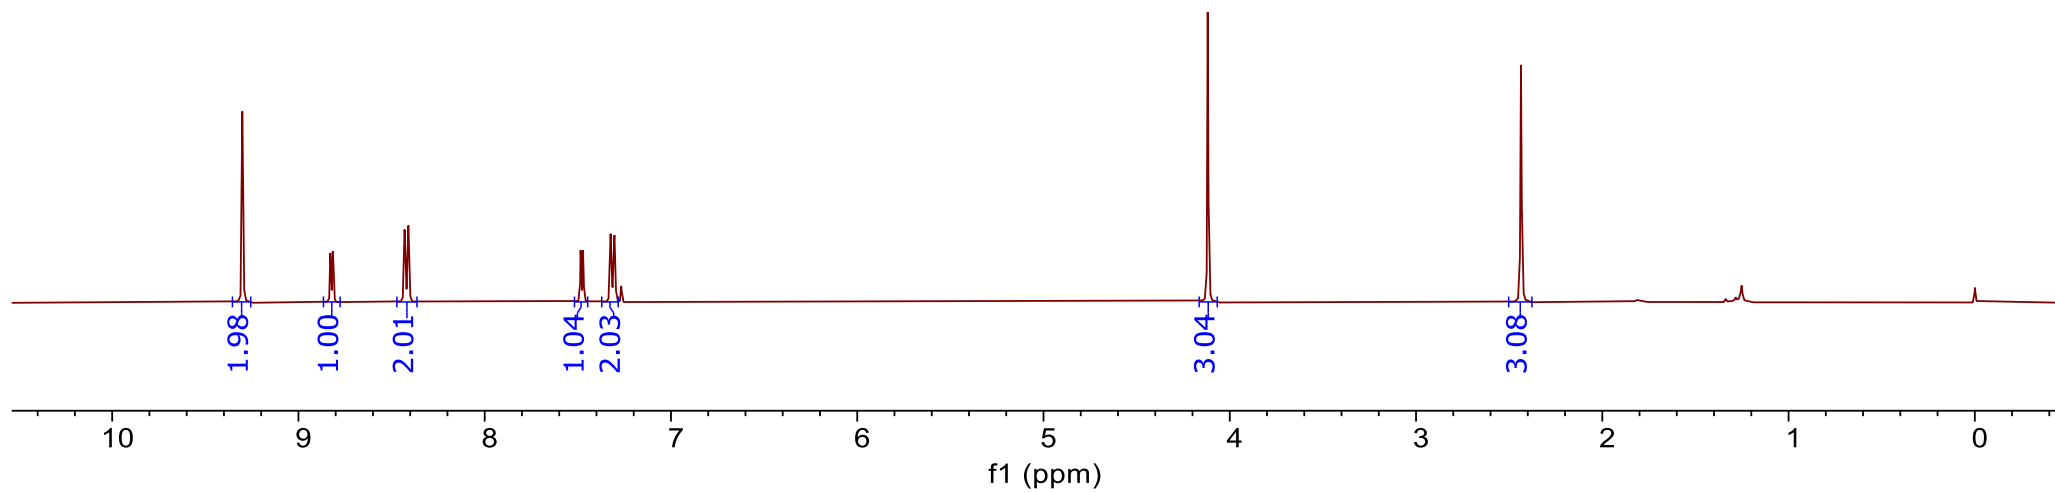

<sup>1</sup>H NMR Spectrum of **17af**

— -0.00

CDCl<sub>3</sub>, 100.62 MHz

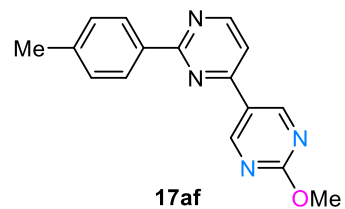

166.95  
165.06  
159.32  
158.52  
158.30

141.56  
134.69  
129.51  
128.36  
124.59

113.20

55.58  
55.54

21.65  
21.62

55.58  
55.54

21.65  
21.62

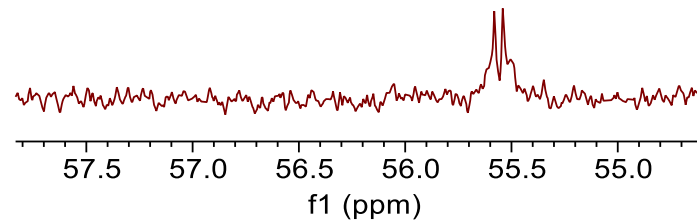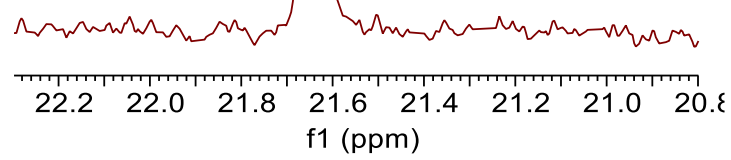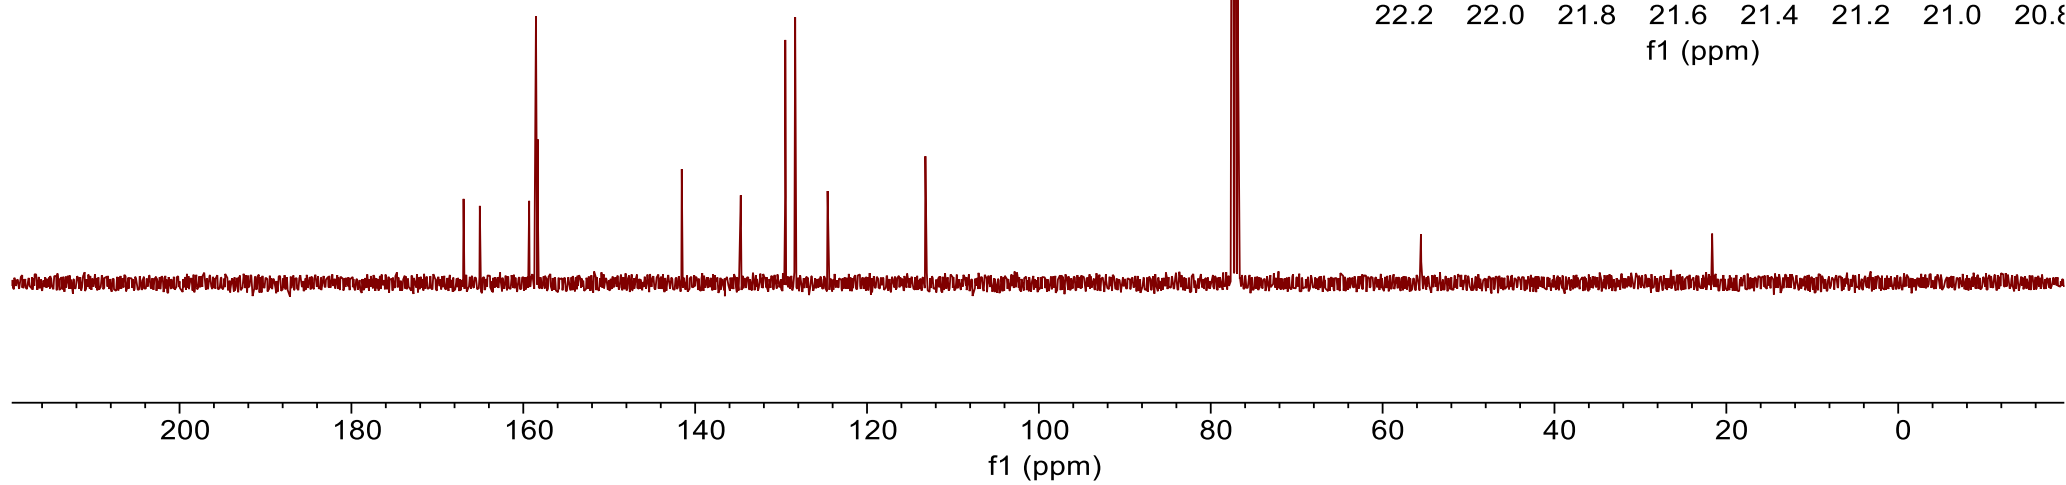

<sup>13</sup>C NMR Spectrum of 17af

CDCl<sub>3</sub>, 400.13 MHz

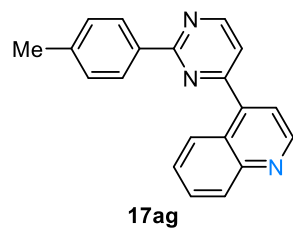

0.00

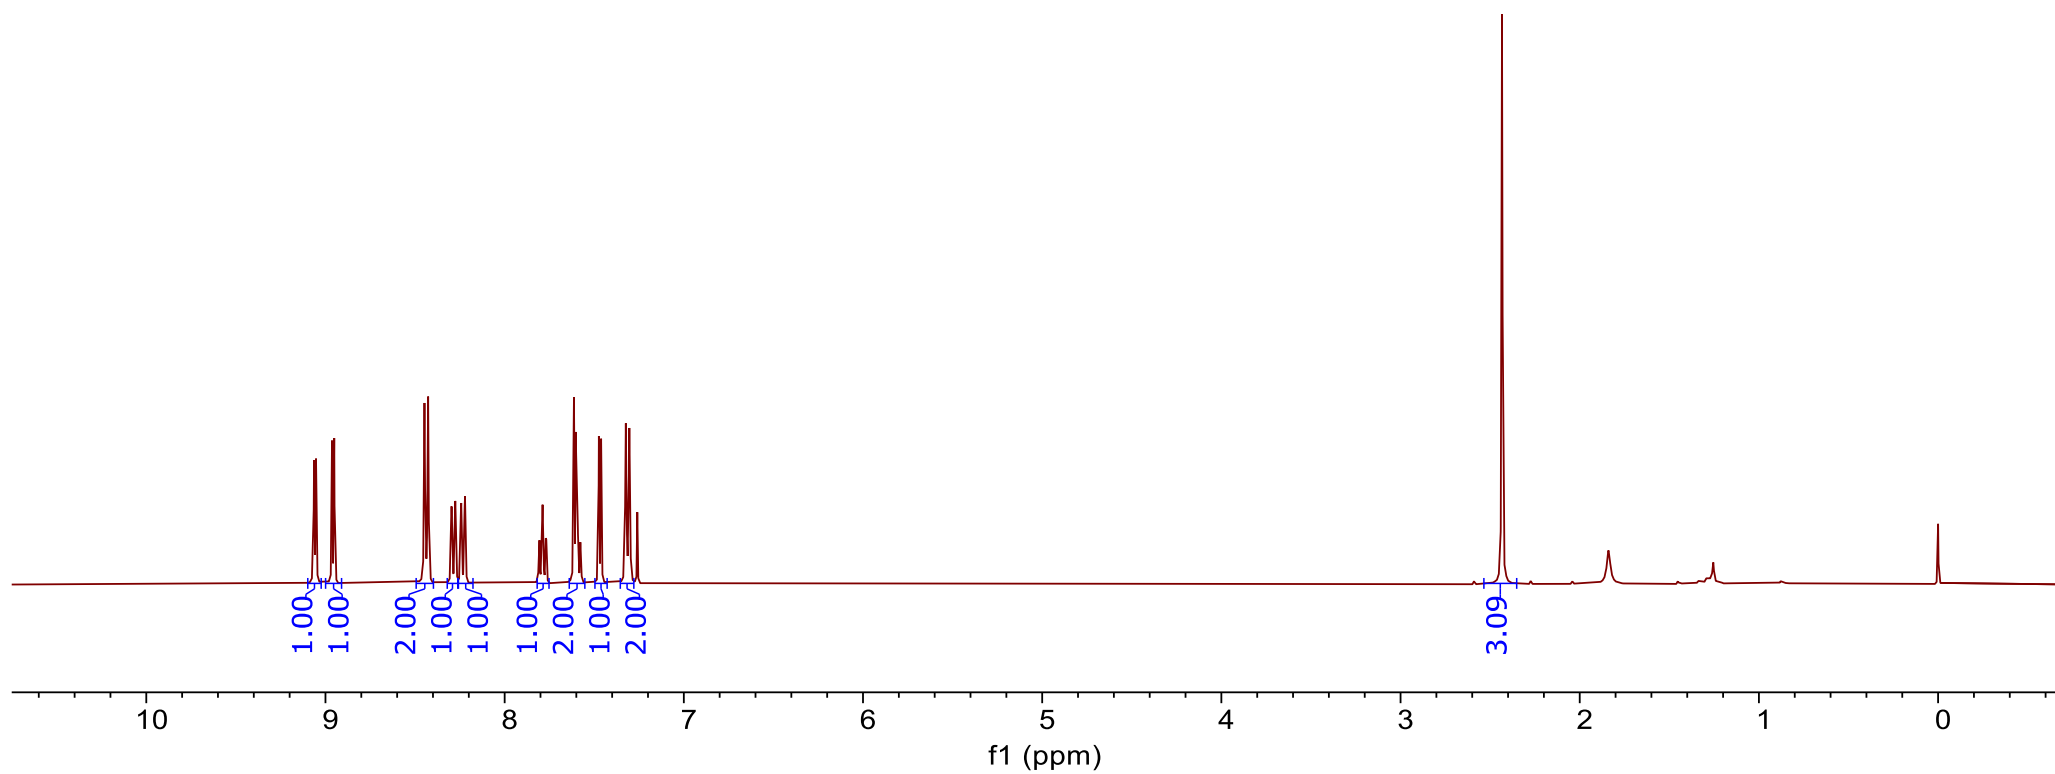

<sup>1</sup>H NMR Spectrum of **17ag**

CDCl<sub>3</sub>, 100.62 MHz

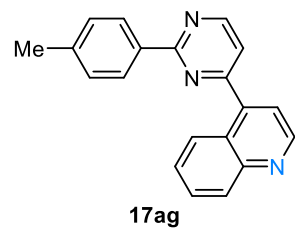

165.02  
164.34  
158.12  
150.12  
149.09  
144.16  
141.63  
134.73  
130.25  
129.85  
129.60  
128.51  
127.60  
125.50  
125.41  
121.46  
119.19

— 21.67

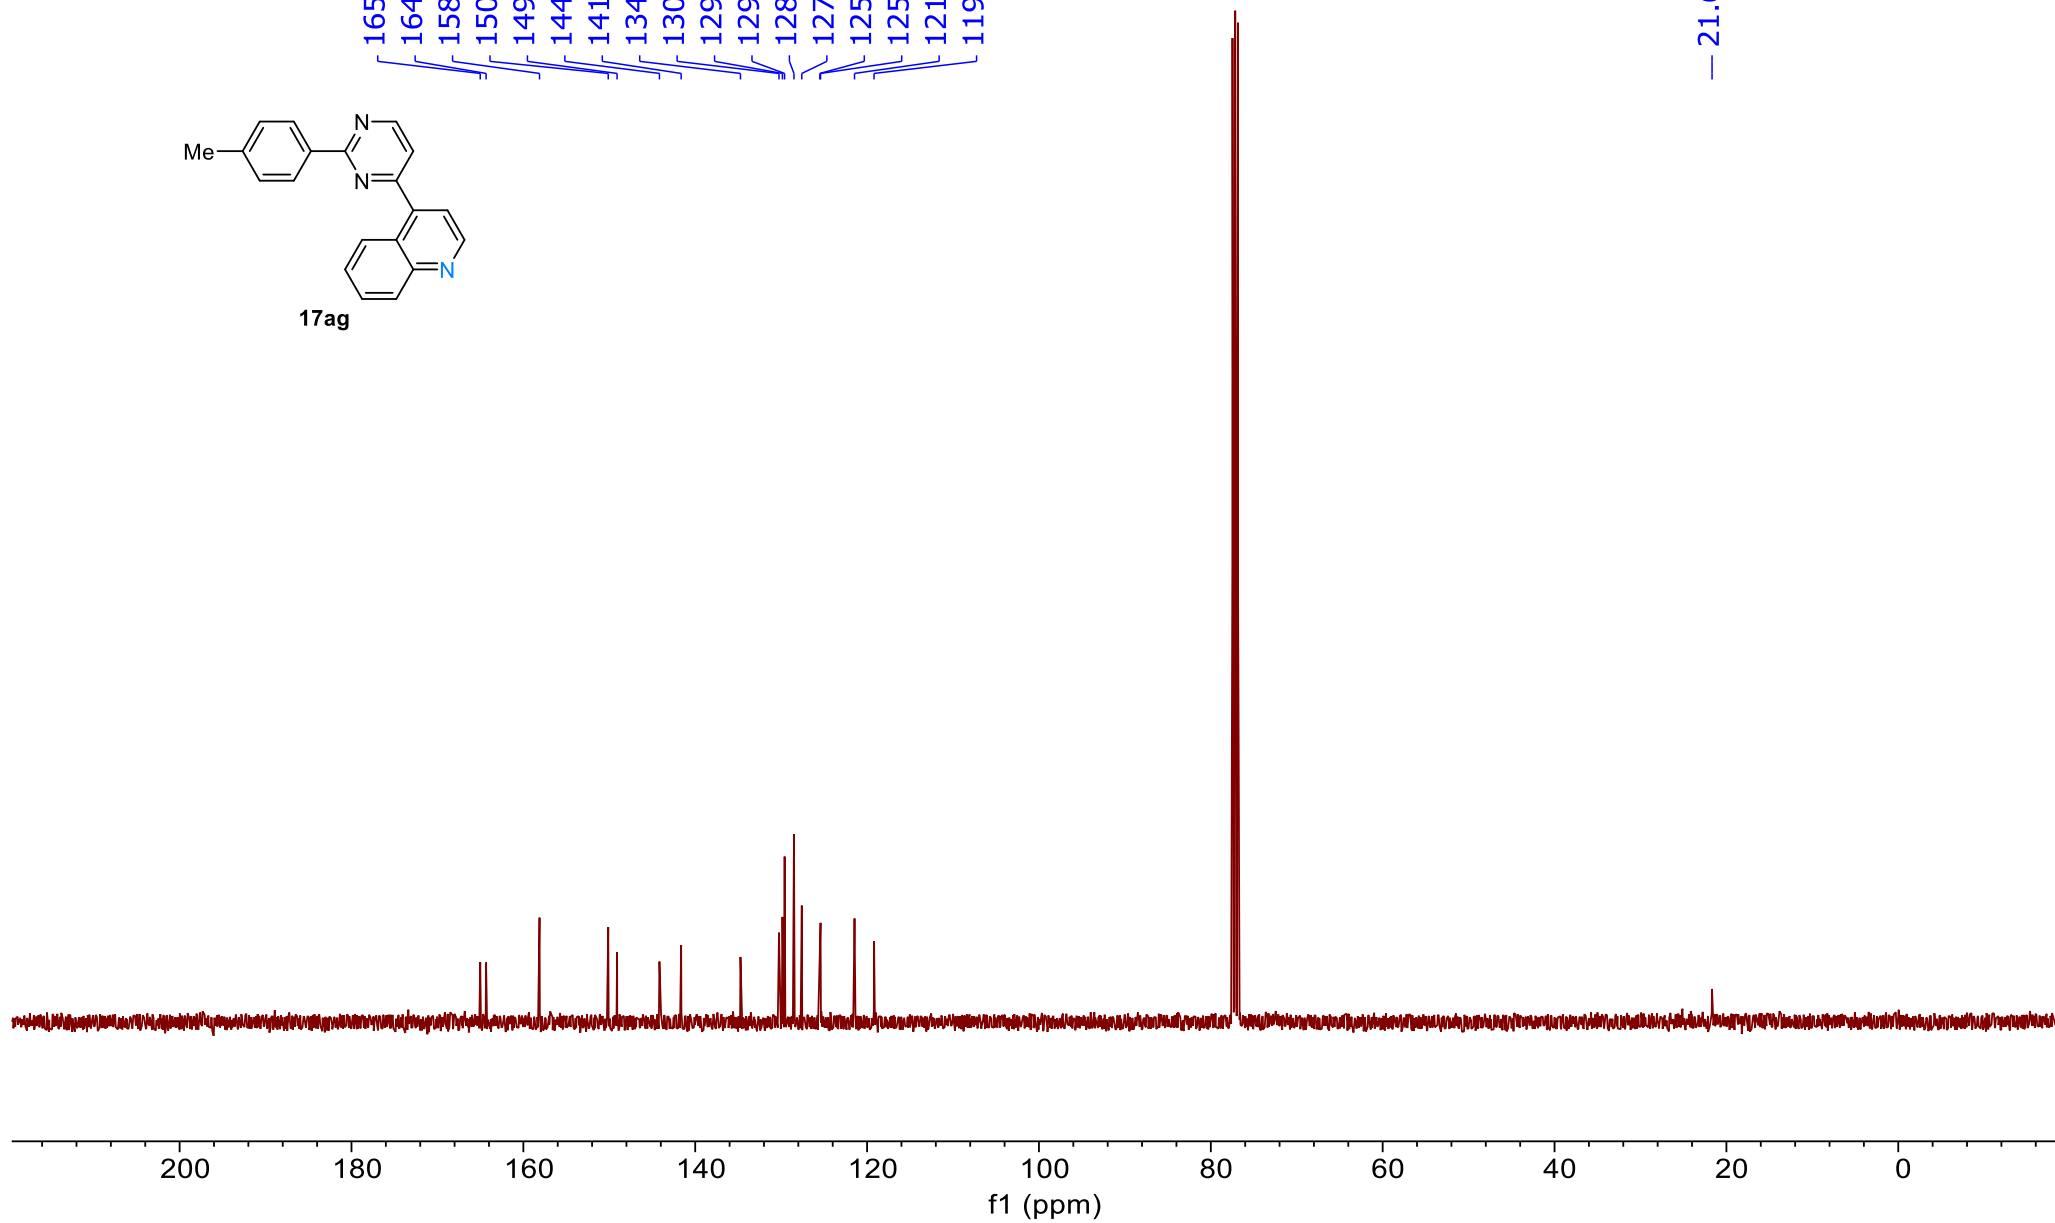

<sup>13</sup>C NMR Spectrum of **17ag**

CDCl<sub>3</sub>, 400.13 MHz

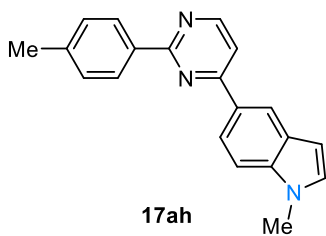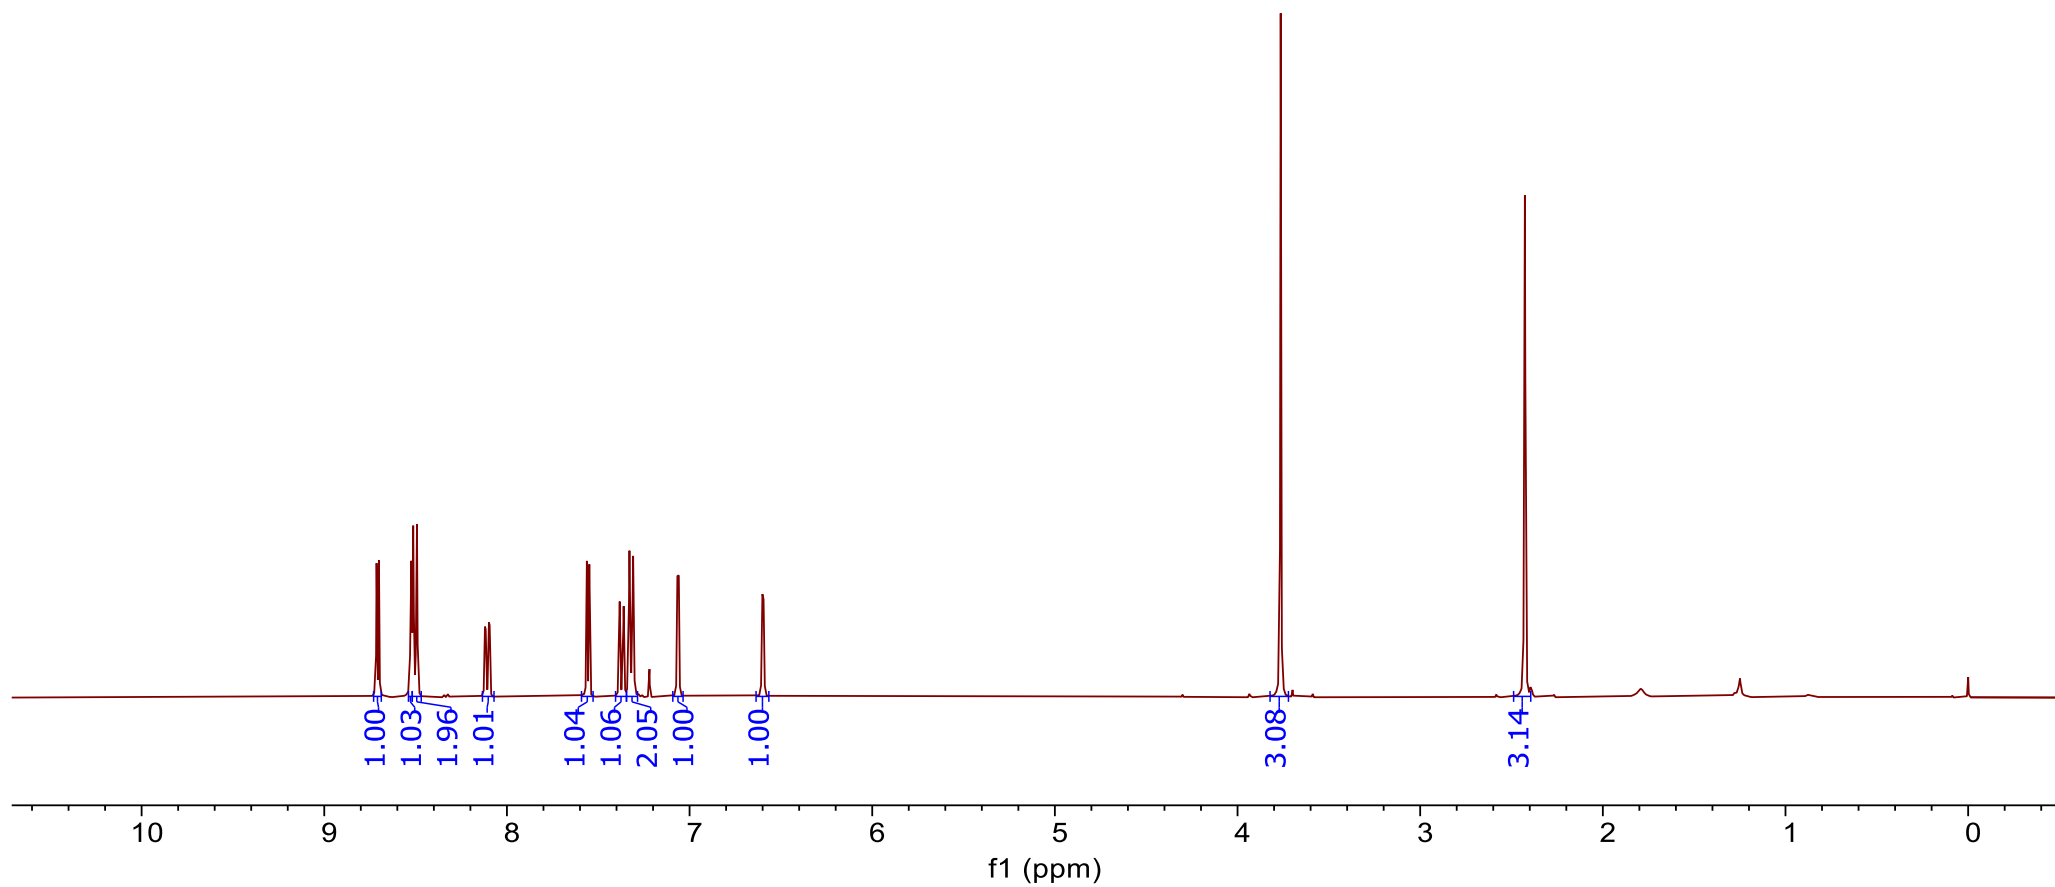

<sup>1</sup>H NMR Spectrum of **17ah**

0.00

CDCl<sub>3</sub>, 100.62 MHz

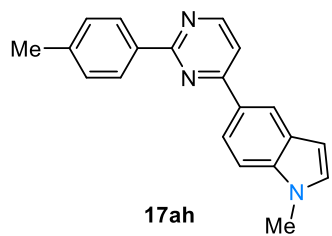

165.02  
164.47  
157.31  
140.72  
138.47  
135.69  
130.14  
129.34  
128.89  
128.44  
128.33  
120.94  
120.68  
113.96  
109.63  
102.42

33.08  
33.04  
21.63  
21.60

33.08  
33.04

21.63  
21.60

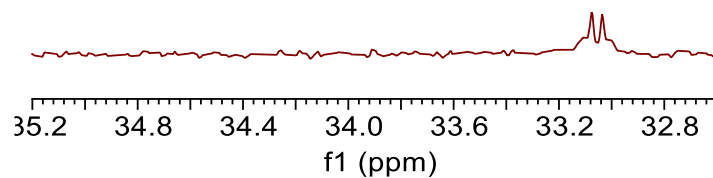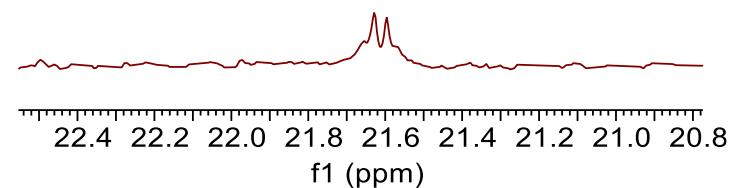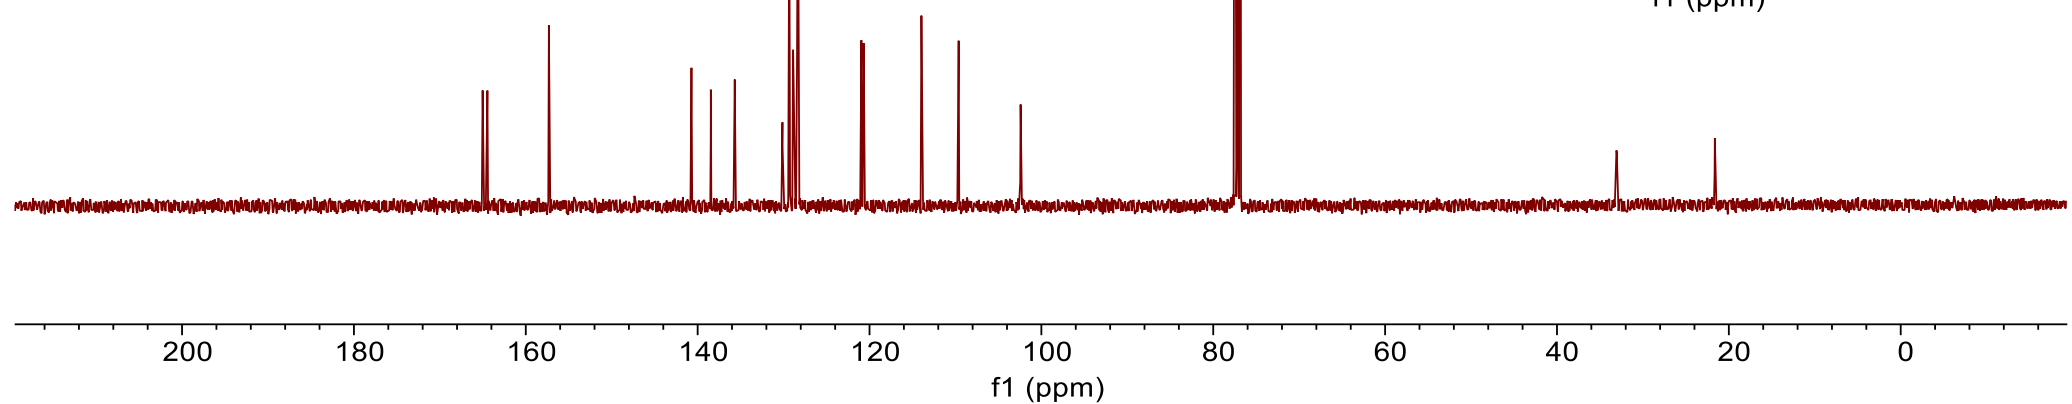

<sup>13</sup>C NMR Spectrum of **17ah**

CDCl<sub>3</sub>, 400.13 MHz

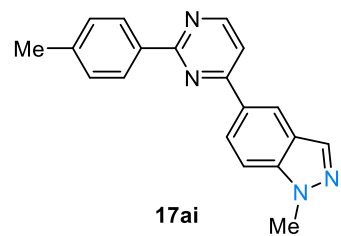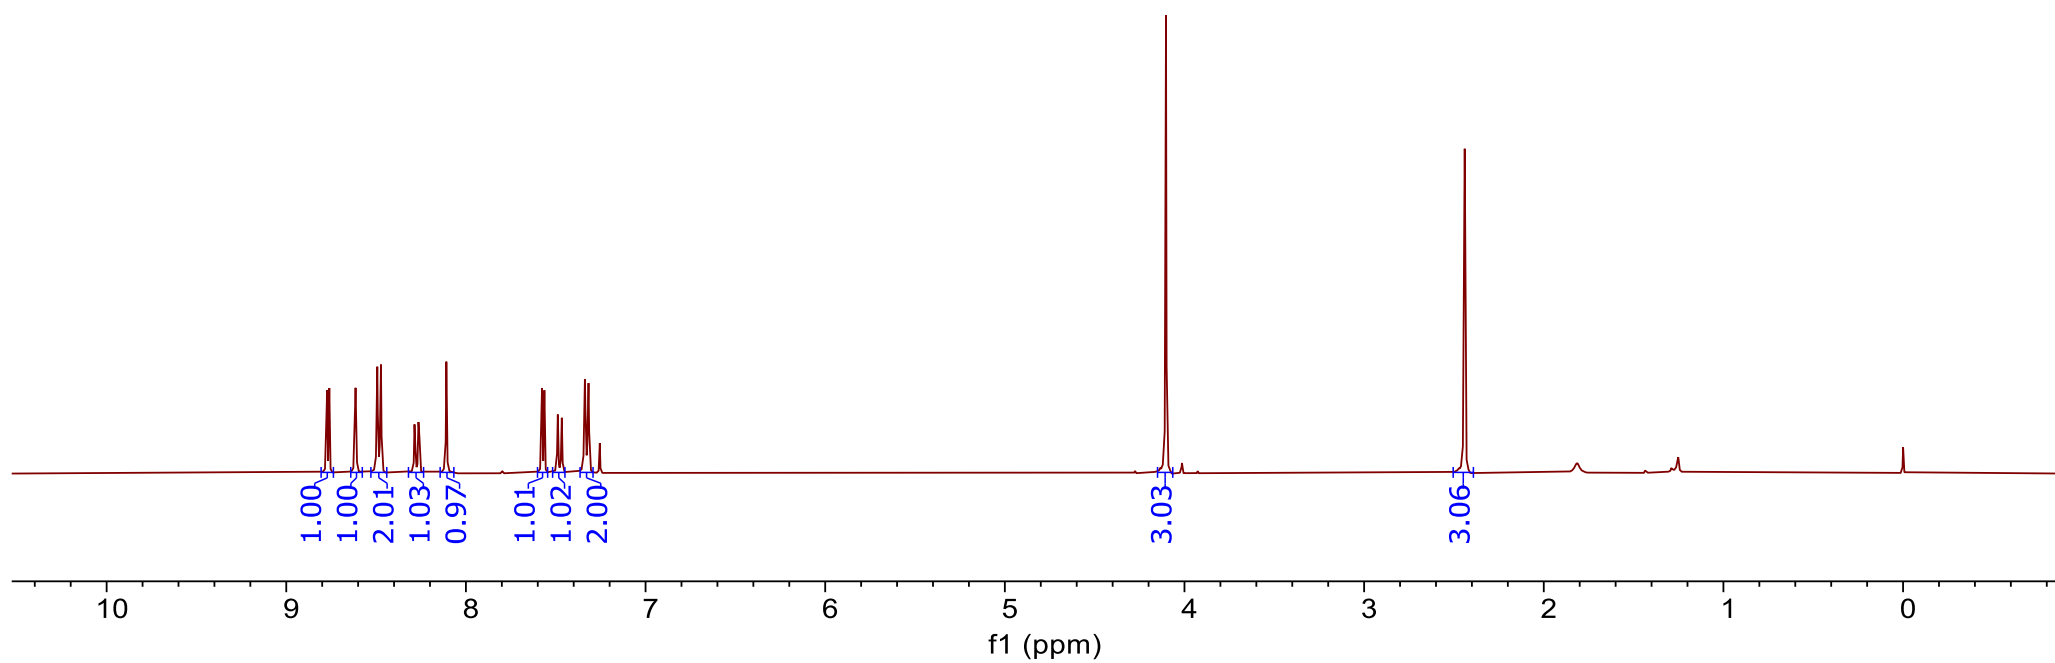

<sup>1</sup>H NMR Spectrum of **17ai**

CDCl<sub>3</sub>, 100.62 MHz

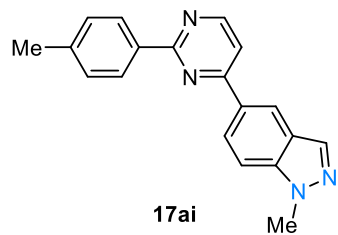

164.66  
163.98  
157.70  
141.12  
141.02  
135.37  
134.24  
129.91  
129.42  
128.35  
125.53  
124.56  
120.99  
114.02  
109.43

35.84  
35.80  
21.65  
21.62

21.65  
21.62

35.84  
35.80

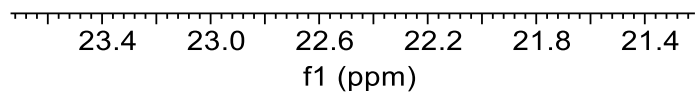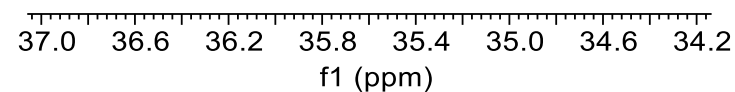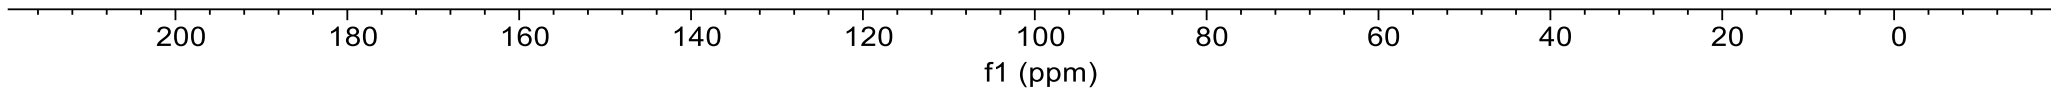

<sup>13</sup>C NMR Spectrum of 17ai



CDCl<sub>3</sub>, 400.13 MHz

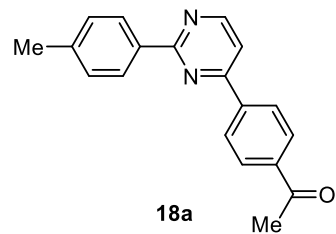

18a

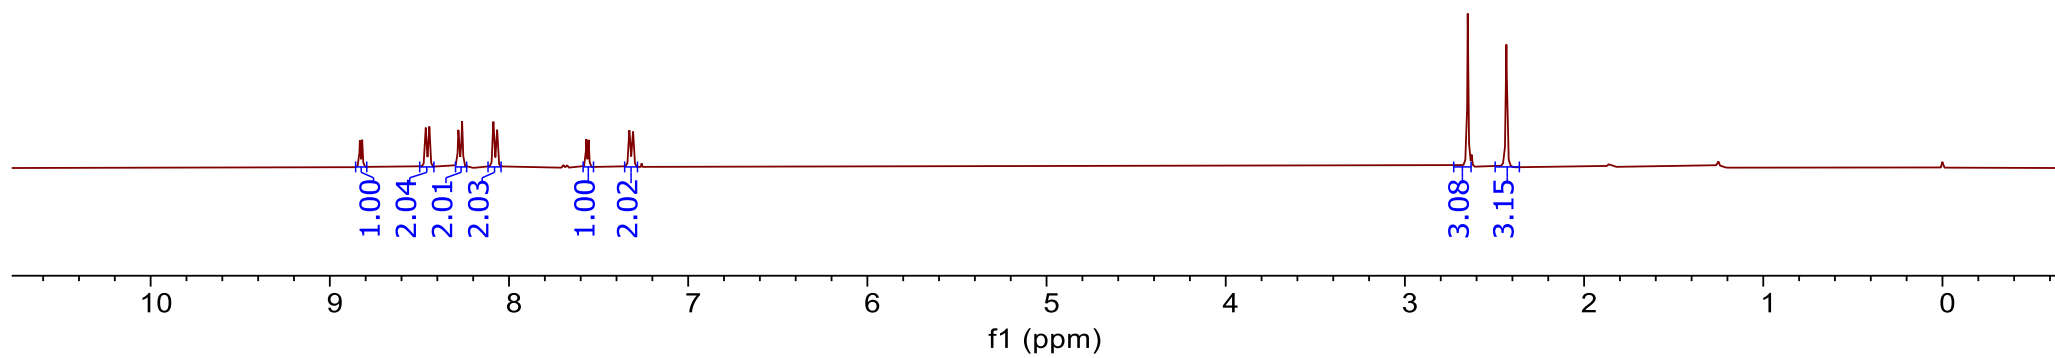

<sup>1</sup>H NMR Spectrum of 18a

— -0.00

CDCl<sub>3</sub>, 100.62 MHz

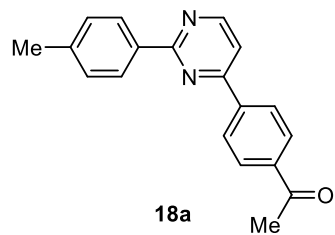

197.717  
164.912  
162.569  
158.223  
141.310  
141.259  
138.692  
134.964  
129.457  
128.911  
128.366  
127.498  
127.467  
114.726

26.906  
26.867  
21.637  
21.597

26.905  
26.866

21.636  
21.596

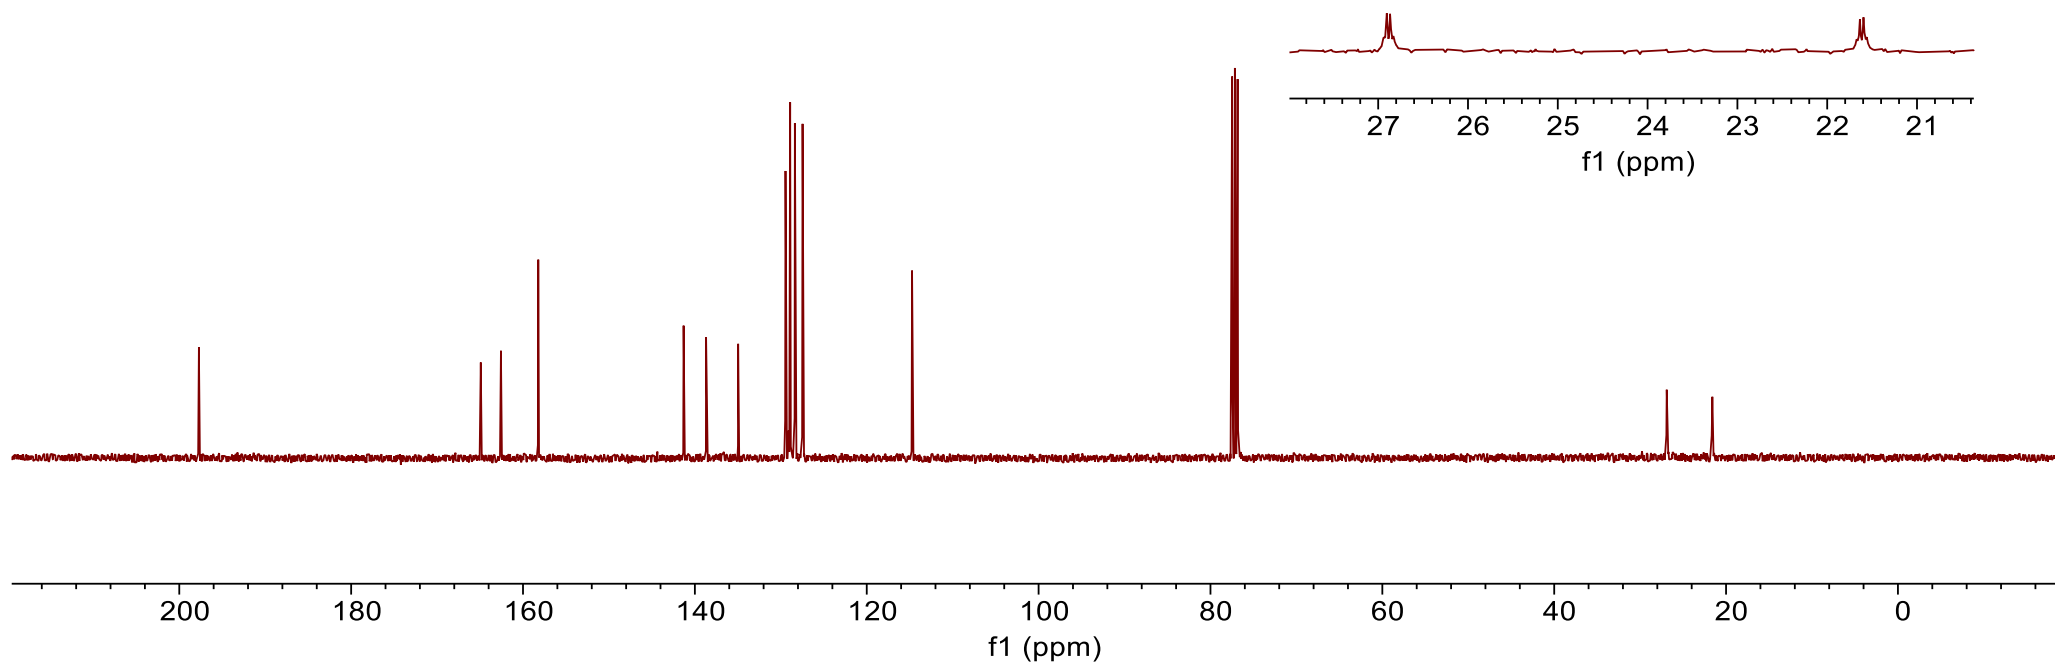

<sup>13</sup>C NMR Spectrum of **18a**

CDCl<sub>3</sub>, 400.13 MHz

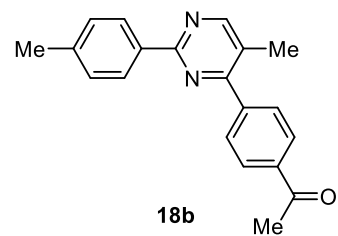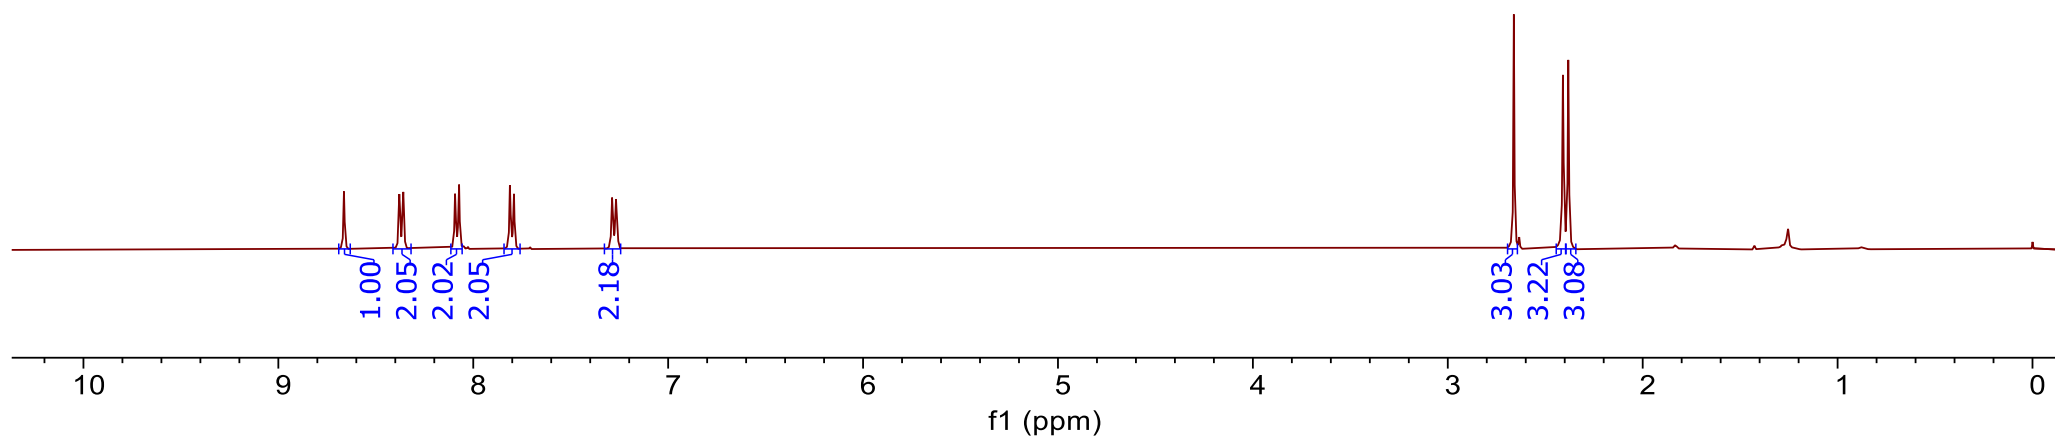

<sup>1</sup>H NMR Spectrum of **18b**

CDCl<sub>3</sub>, 100.62 MHz

— 197.78

163.74

162.80

159.55

143.02

140.79

137.45

134.89

129.47

129.38

128.39

128.06

125.42

~ 26.86

~ 21.56

~ 16.96

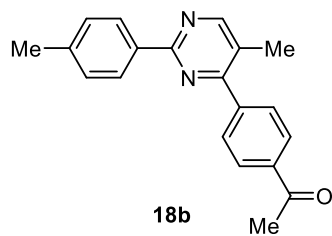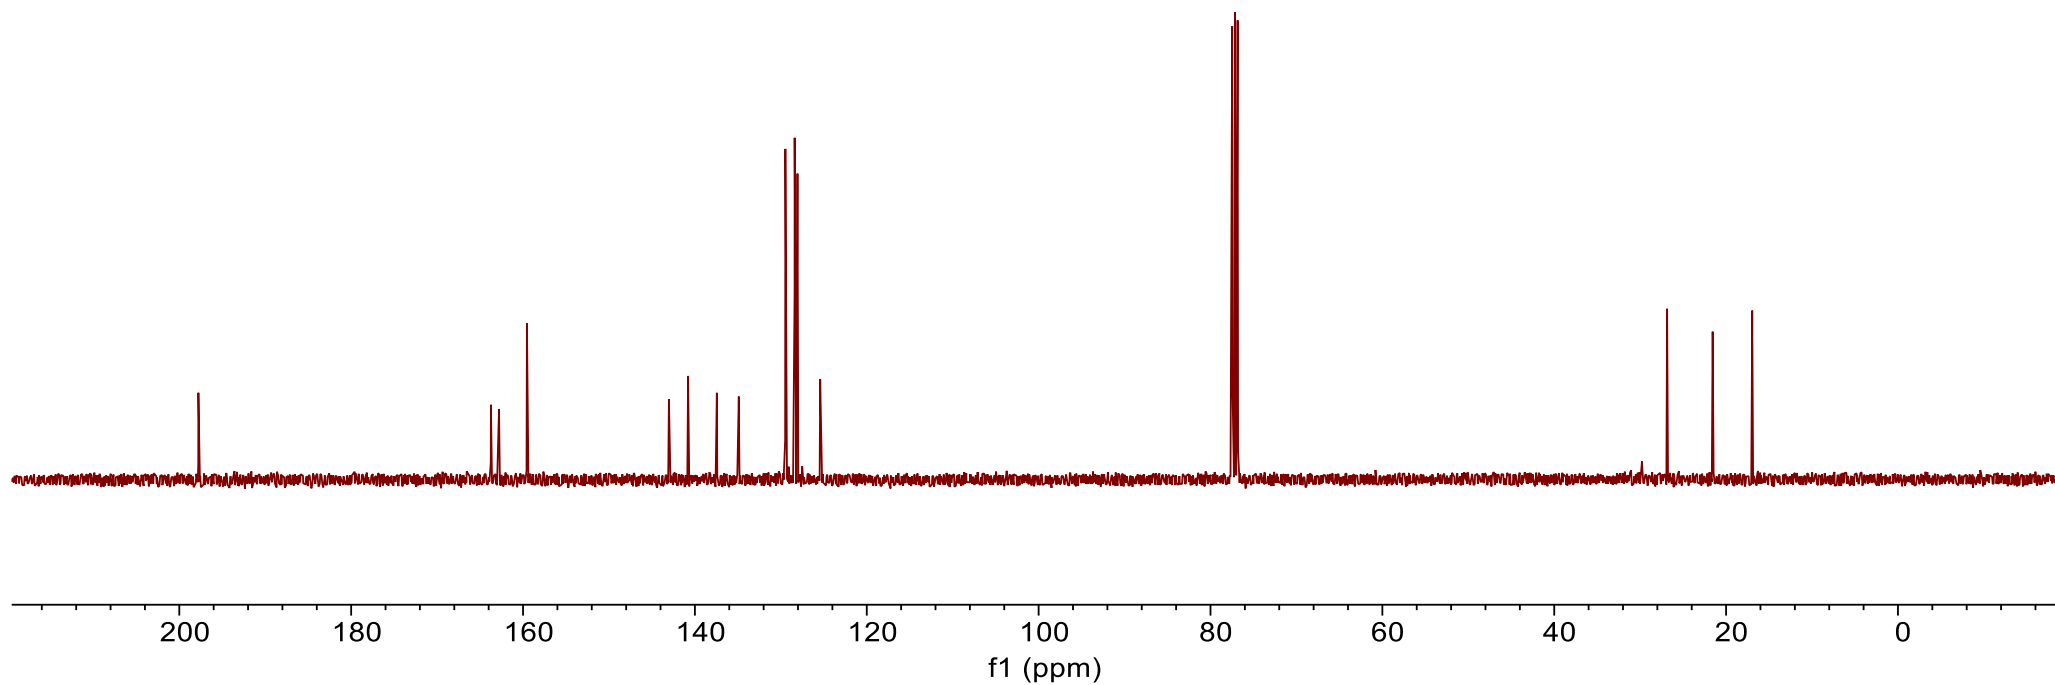

<sup>13</sup>C NMR Spectrum of **18b**

CDCl<sub>3</sub>, 400.13 MHz

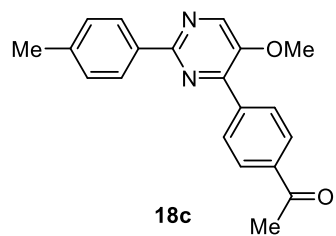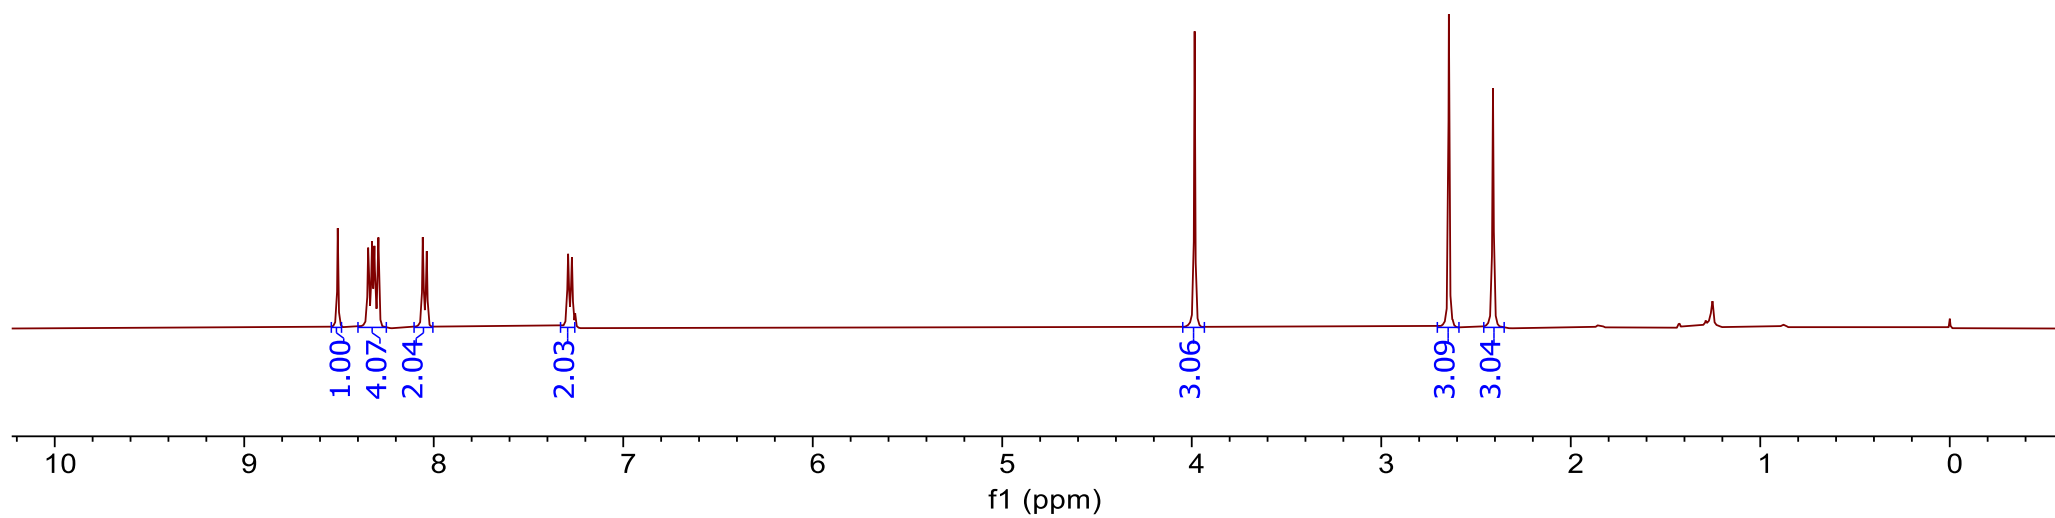

<sup>1</sup>H NMR Spectrum of **18c**

— -0.00

CDCl<sub>3</sub>, 100.62 MHz

— 197.91

157.56

151.84

149.91

141.52

140.18

140.09

137.74

134.82

129.99

129.37

128.10

127.70

— 56.34

— 26.86

— 21.51

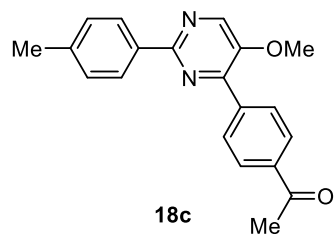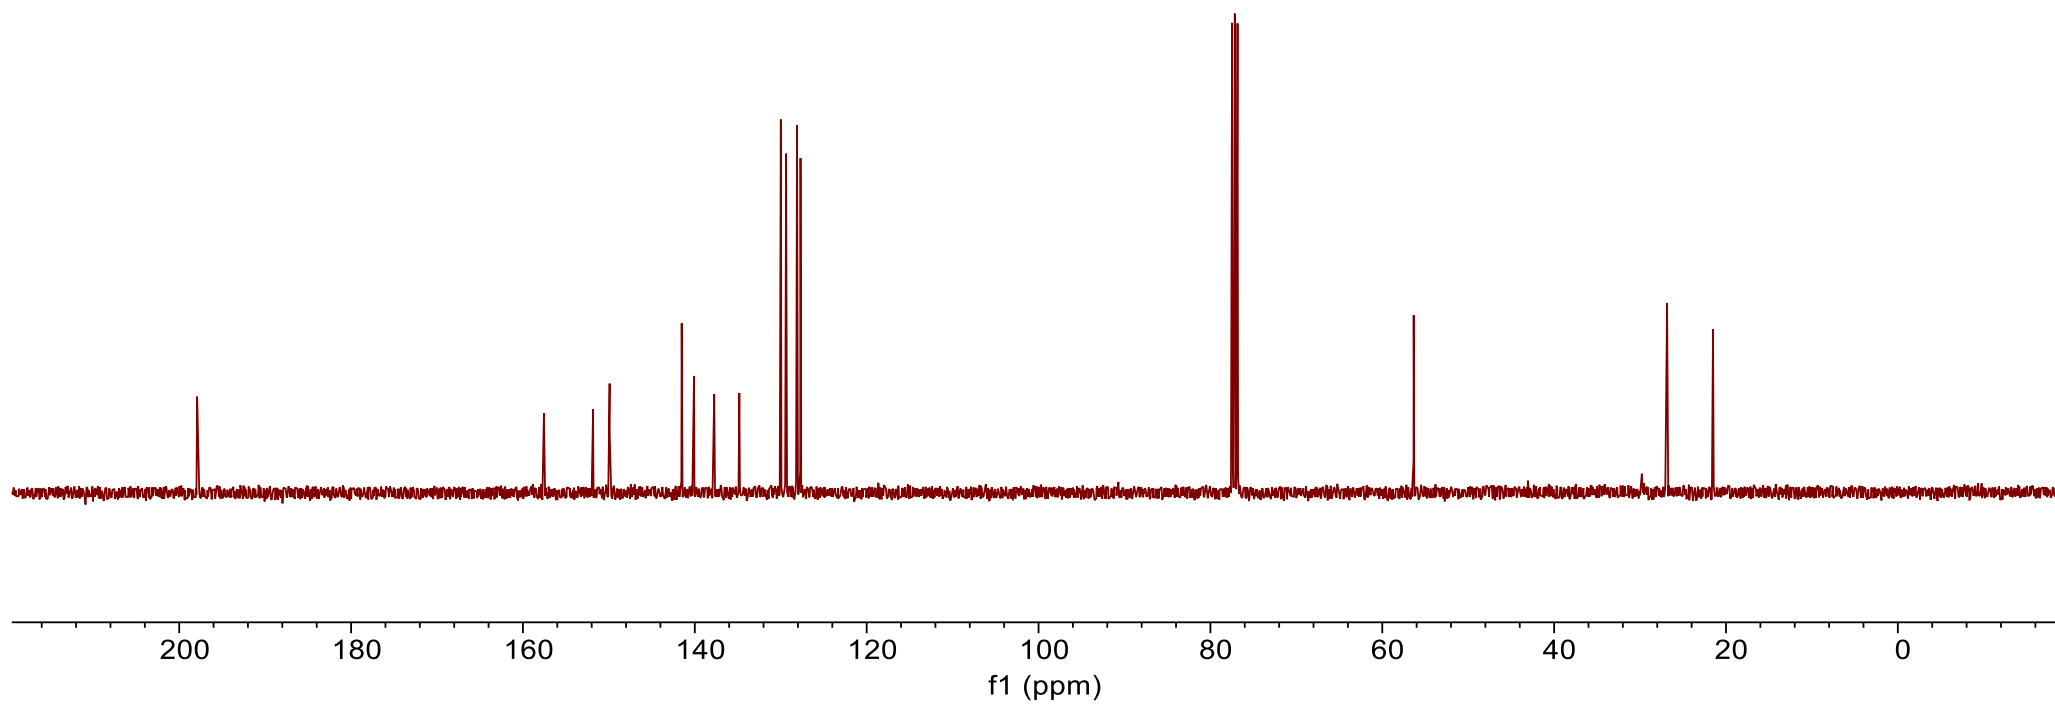

<sup>13</sup>C NMR Spectrum of **18c**

CDCl<sub>3</sub>, 400.13 MHz

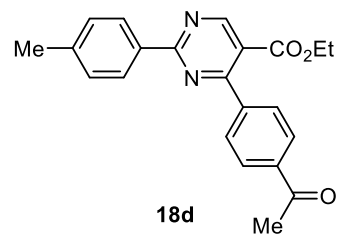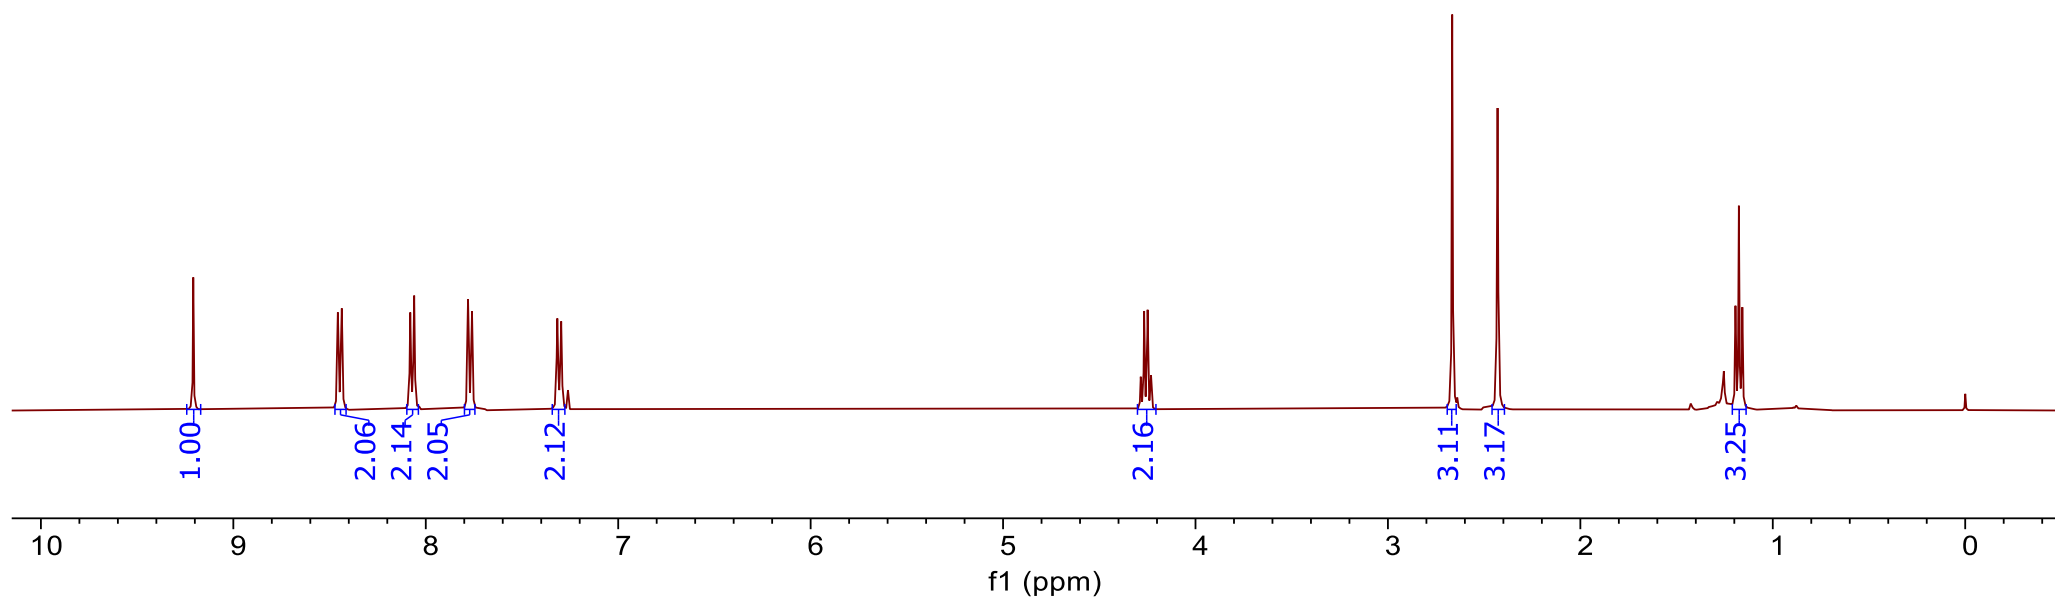

<sup>1</sup>H NMR Spectrum of **18d**

— -0.00

CDCl<sub>3</sub>, 100.62 MHz

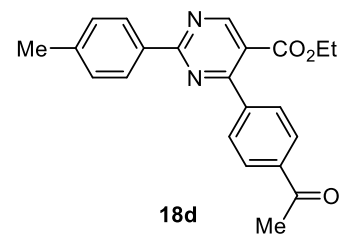

— 197.70

165.88

165.74

165.38

159.51

142.72

142.46

137.92

133.91

129.59

129.38

129.05

128.16

121.53

— 61.88

26.89

21.71

13.95

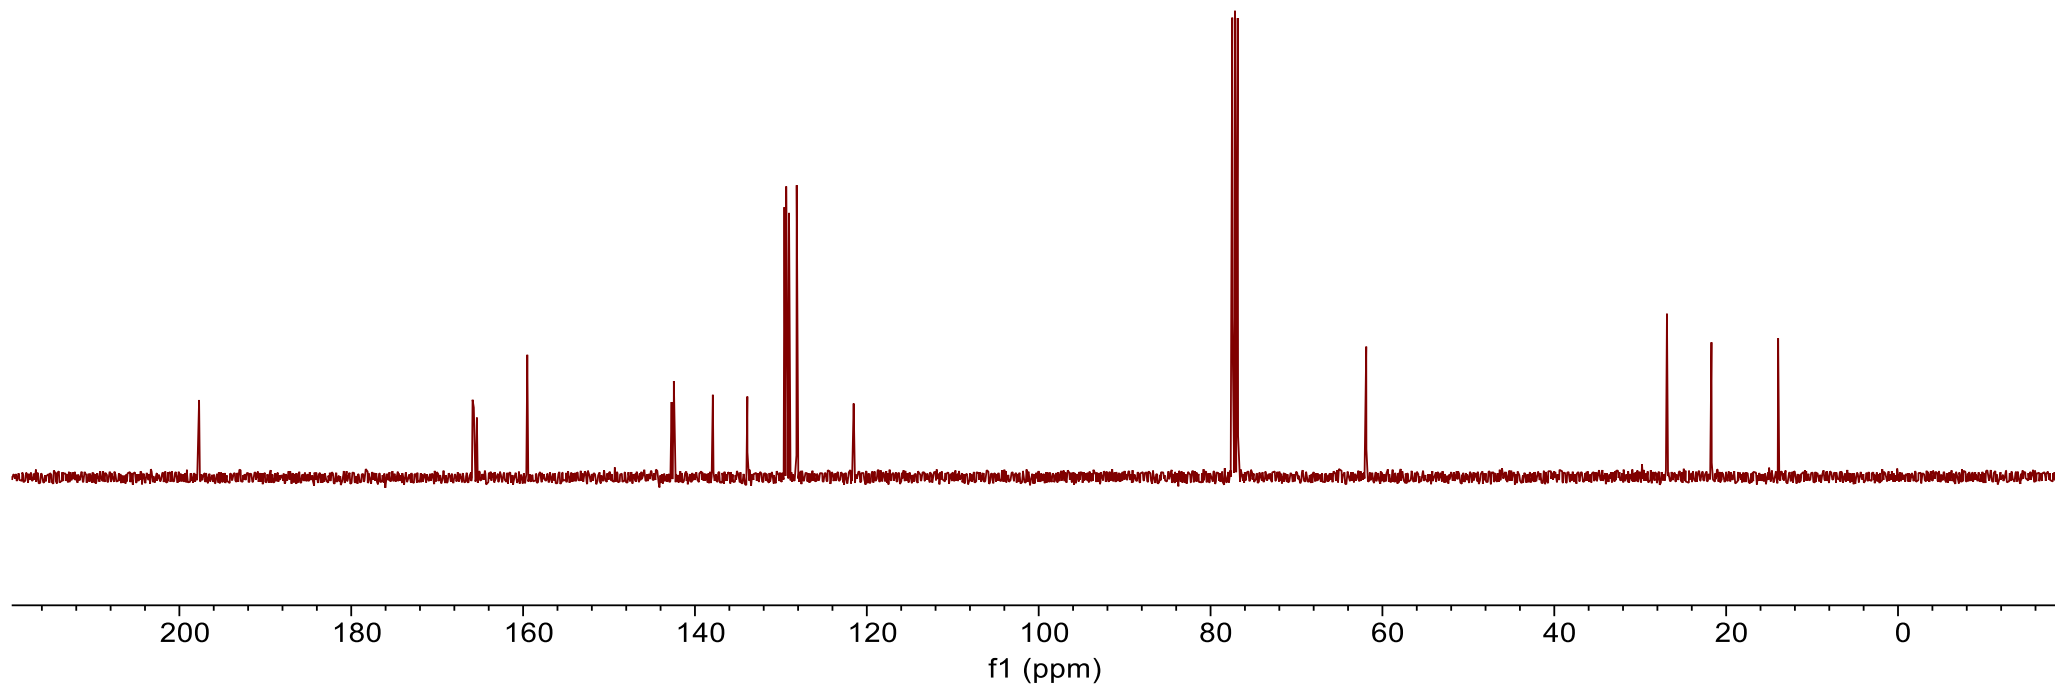

<sup>13</sup>C NMR Spectrum of **18d**



CDCl<sub>3</sub>, 400.13 MHz

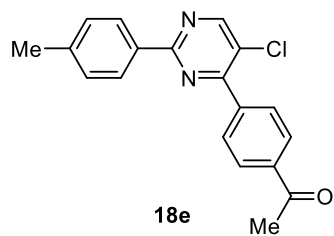

— -0.00

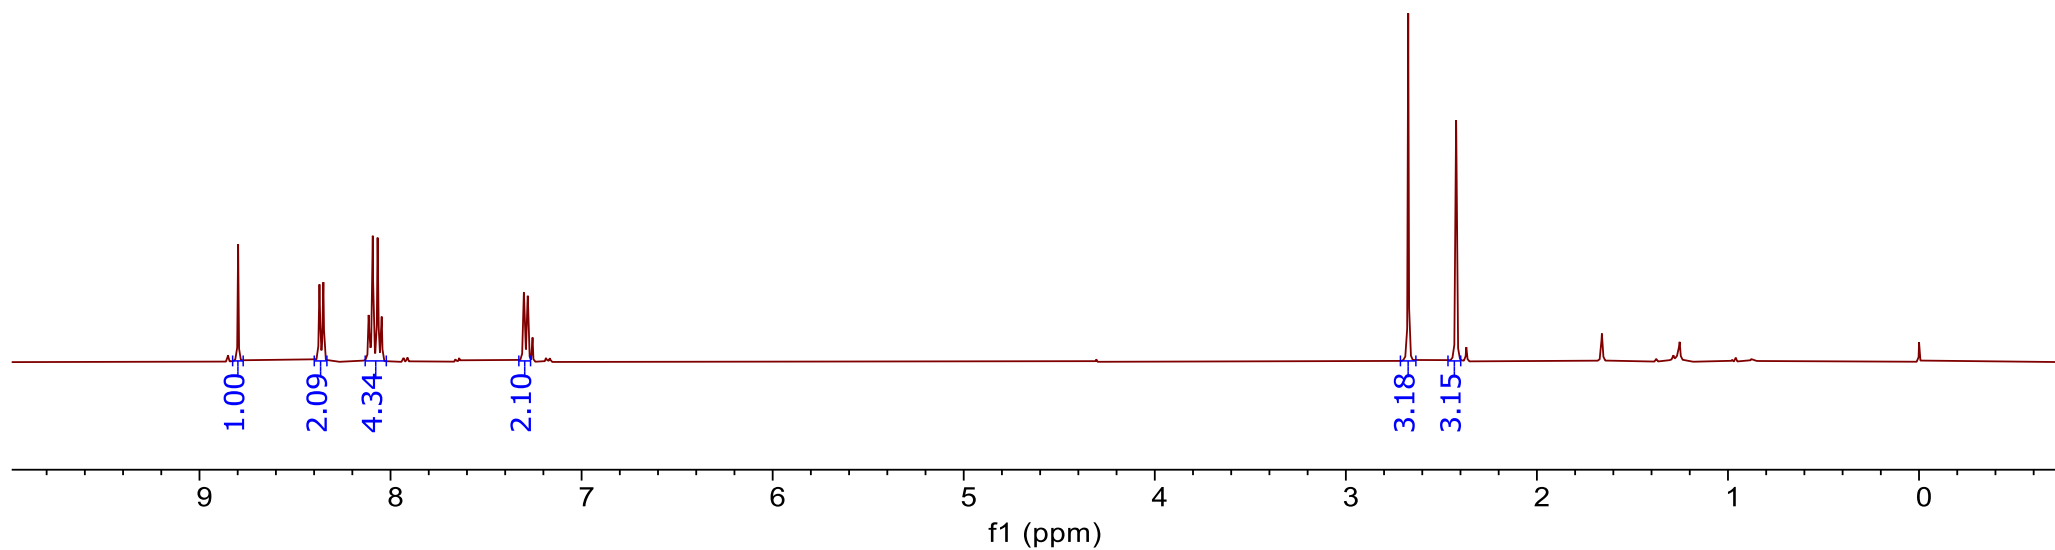

<sup>1</sup>H NMR Spectrum of **18e**

CDCl<sub>3</sub>, 100.62 MHz

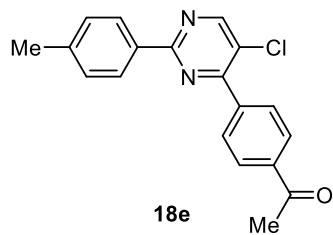

— 197.71

162.86  
161.14  
158.11  
141.69  
140.51  
138.16  
133.83  
129.97  
129.56  
128.44  
128.27  
126.58

26.96  
26.90  
21.69  
21.64

26.96  
26.90

21.69  
21.64

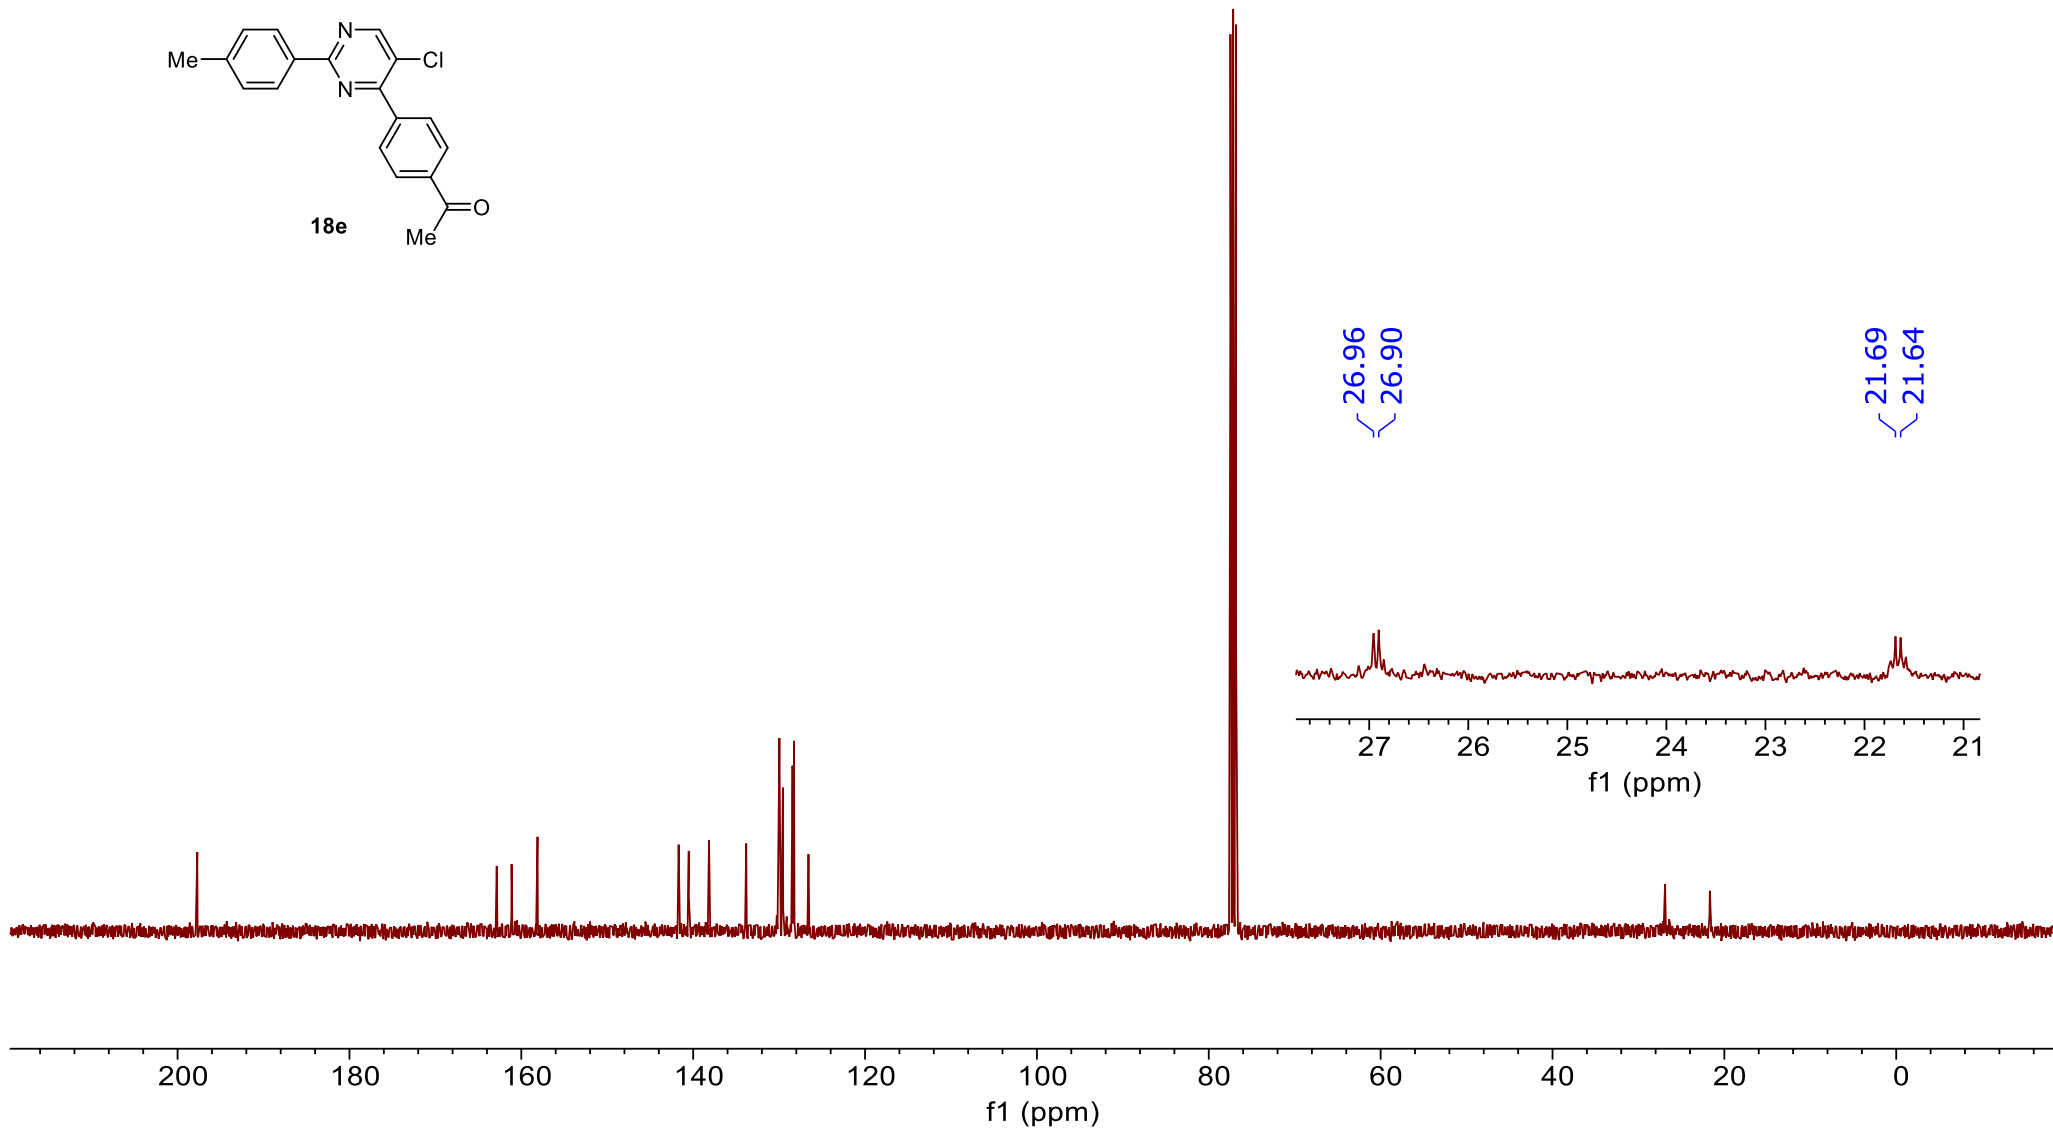

<sup>13</sup>C NMR Spectrum of **18e**

CDCl<sub>3</sub>, 400.13 MHz

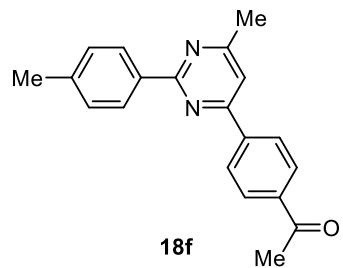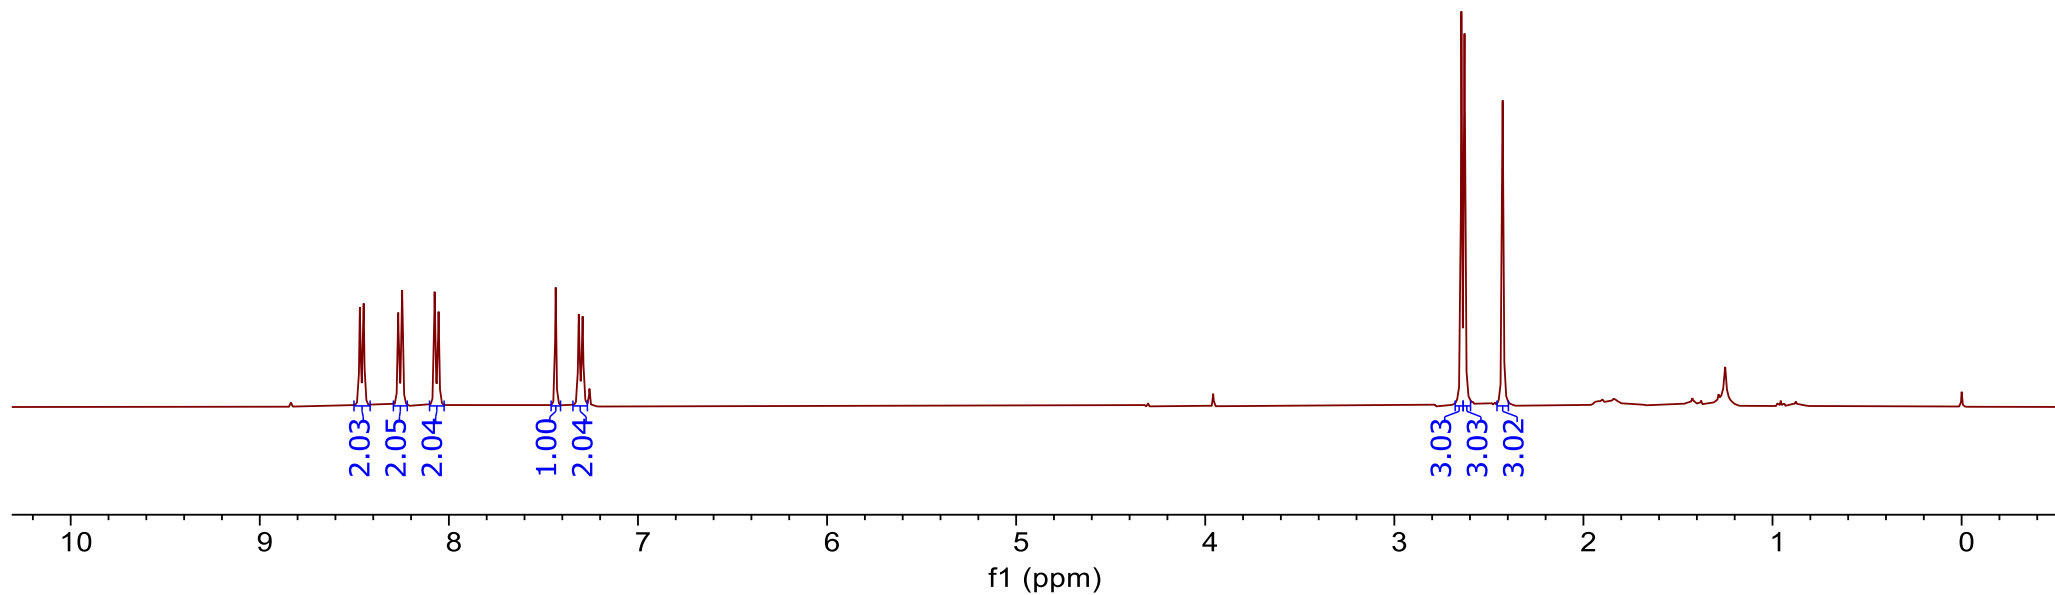

<sup>1</sup>H NMR Spectrum of **18f**

— -0.00

CDCl<sub>3</sub>, 100.62 MHz

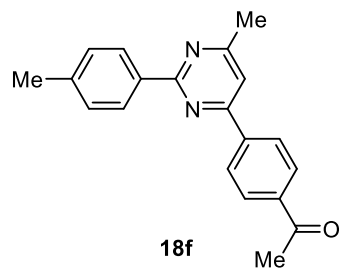

197.78

168.21  
164.62  
162.36

141.66  
140.99  
138.48  
135.23  
129.36  
128.85  
128.42  
127.45  
114.25

26.91  
26.85  
24.77  
24.72  
21.64  
21.59

26.91  
26.85

24.77  
24.72

21.64  
21.59

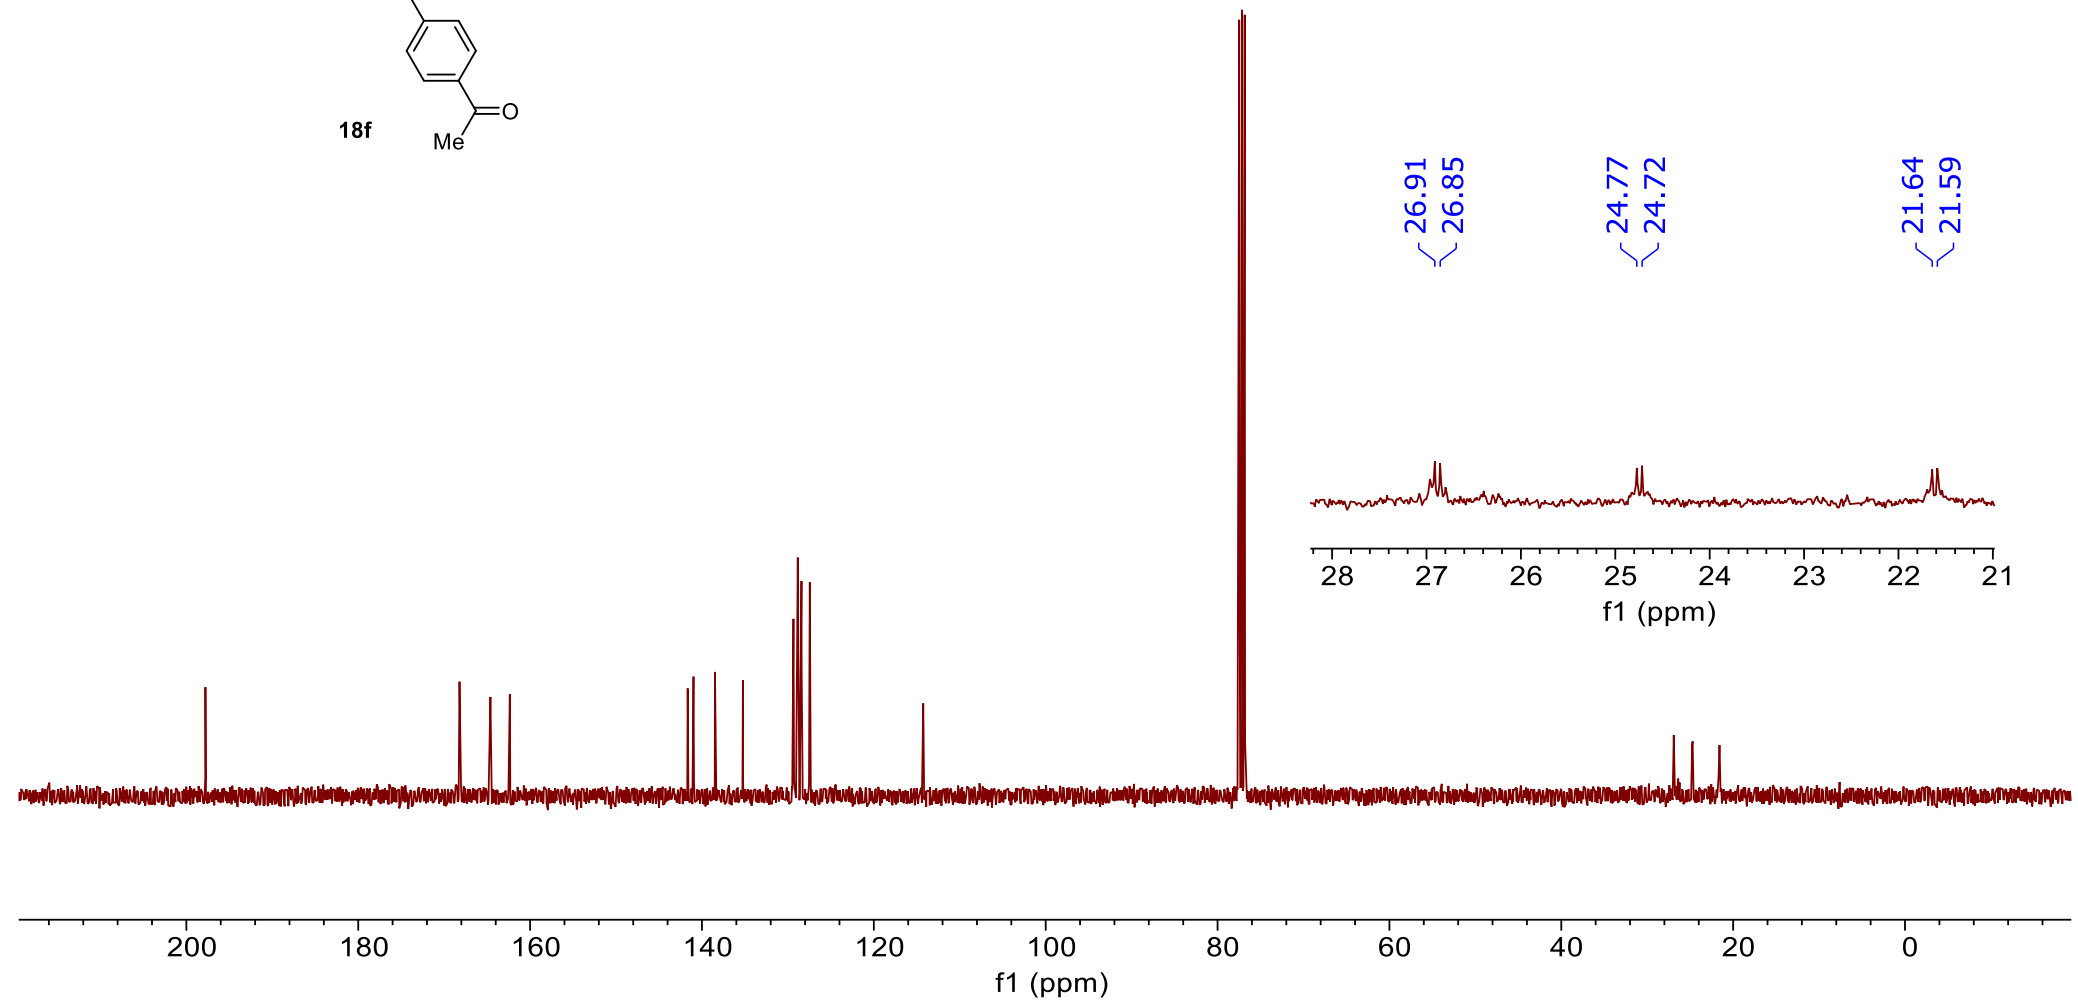

<sup>13</sup>C NMR Spectrum of 18f

CDCl<sub>3</sub>, 400.13 MHz

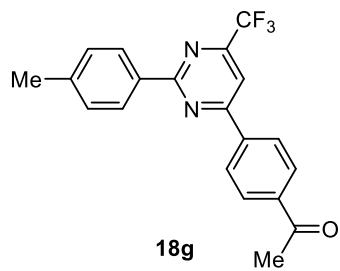

-0.00

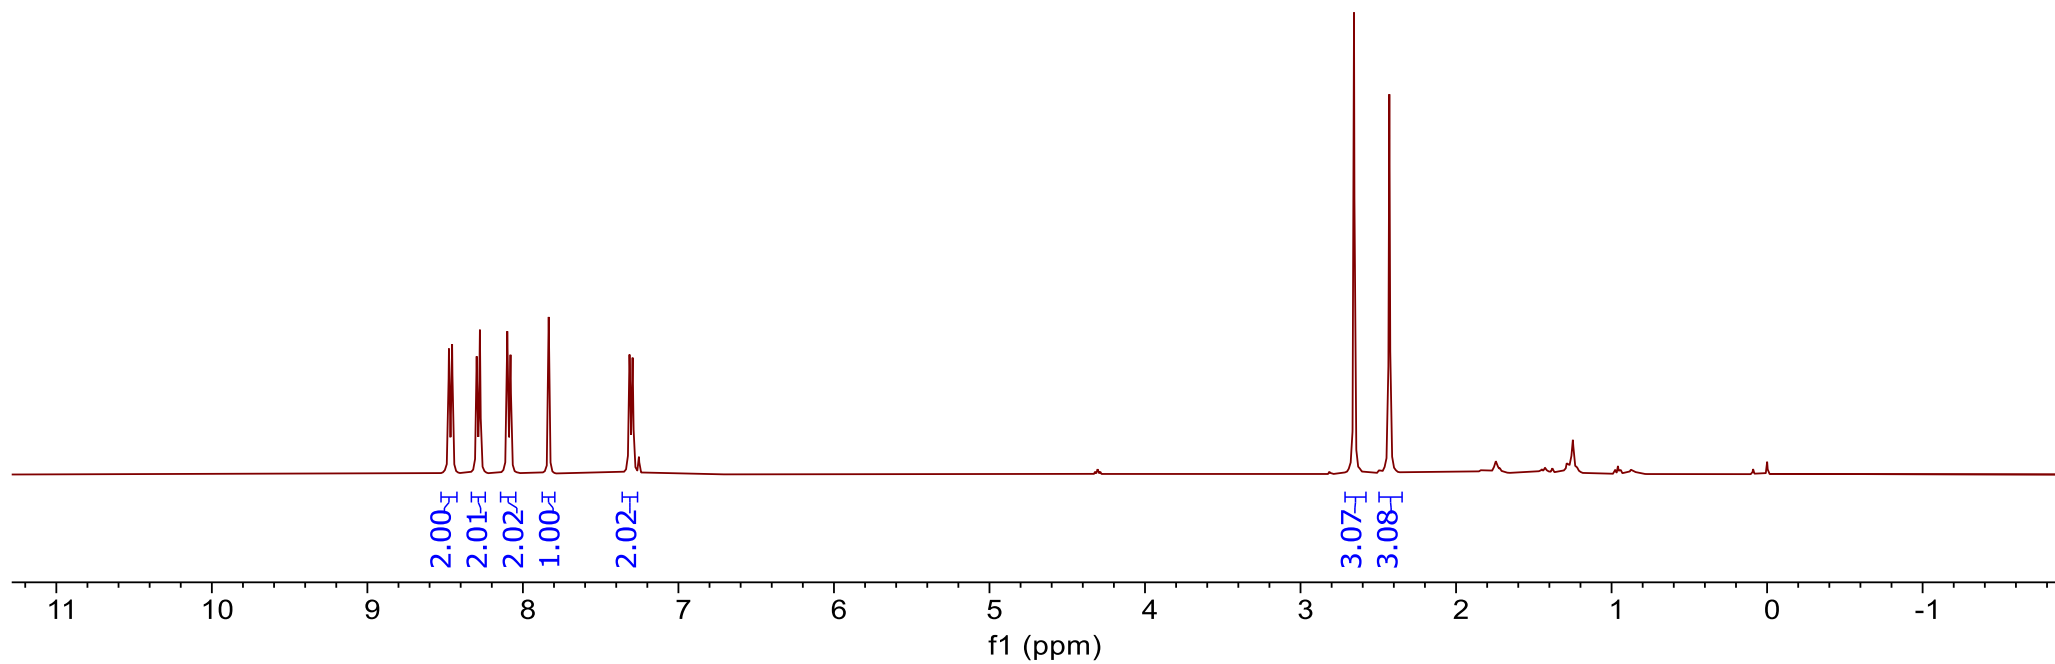

<sup>1</sup>H NMR Spectrum of **18g**

CDCl<sub>3</sub>, 100.62 MHz

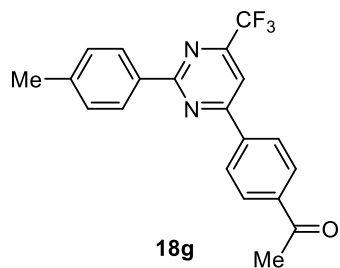

197.50  
165.69  
165.13  
157.61  
157.25  
156.90  
156.52  
142.40  
140.05  
139.34  
133.64  
129.58  
129.03  
128.81  
127.73  
125.03  
122.27  
119.54  
116.50  
110.06

26.92  
26.87  
21.72  
21.66

26.92  
26.87

21.72  
21.66

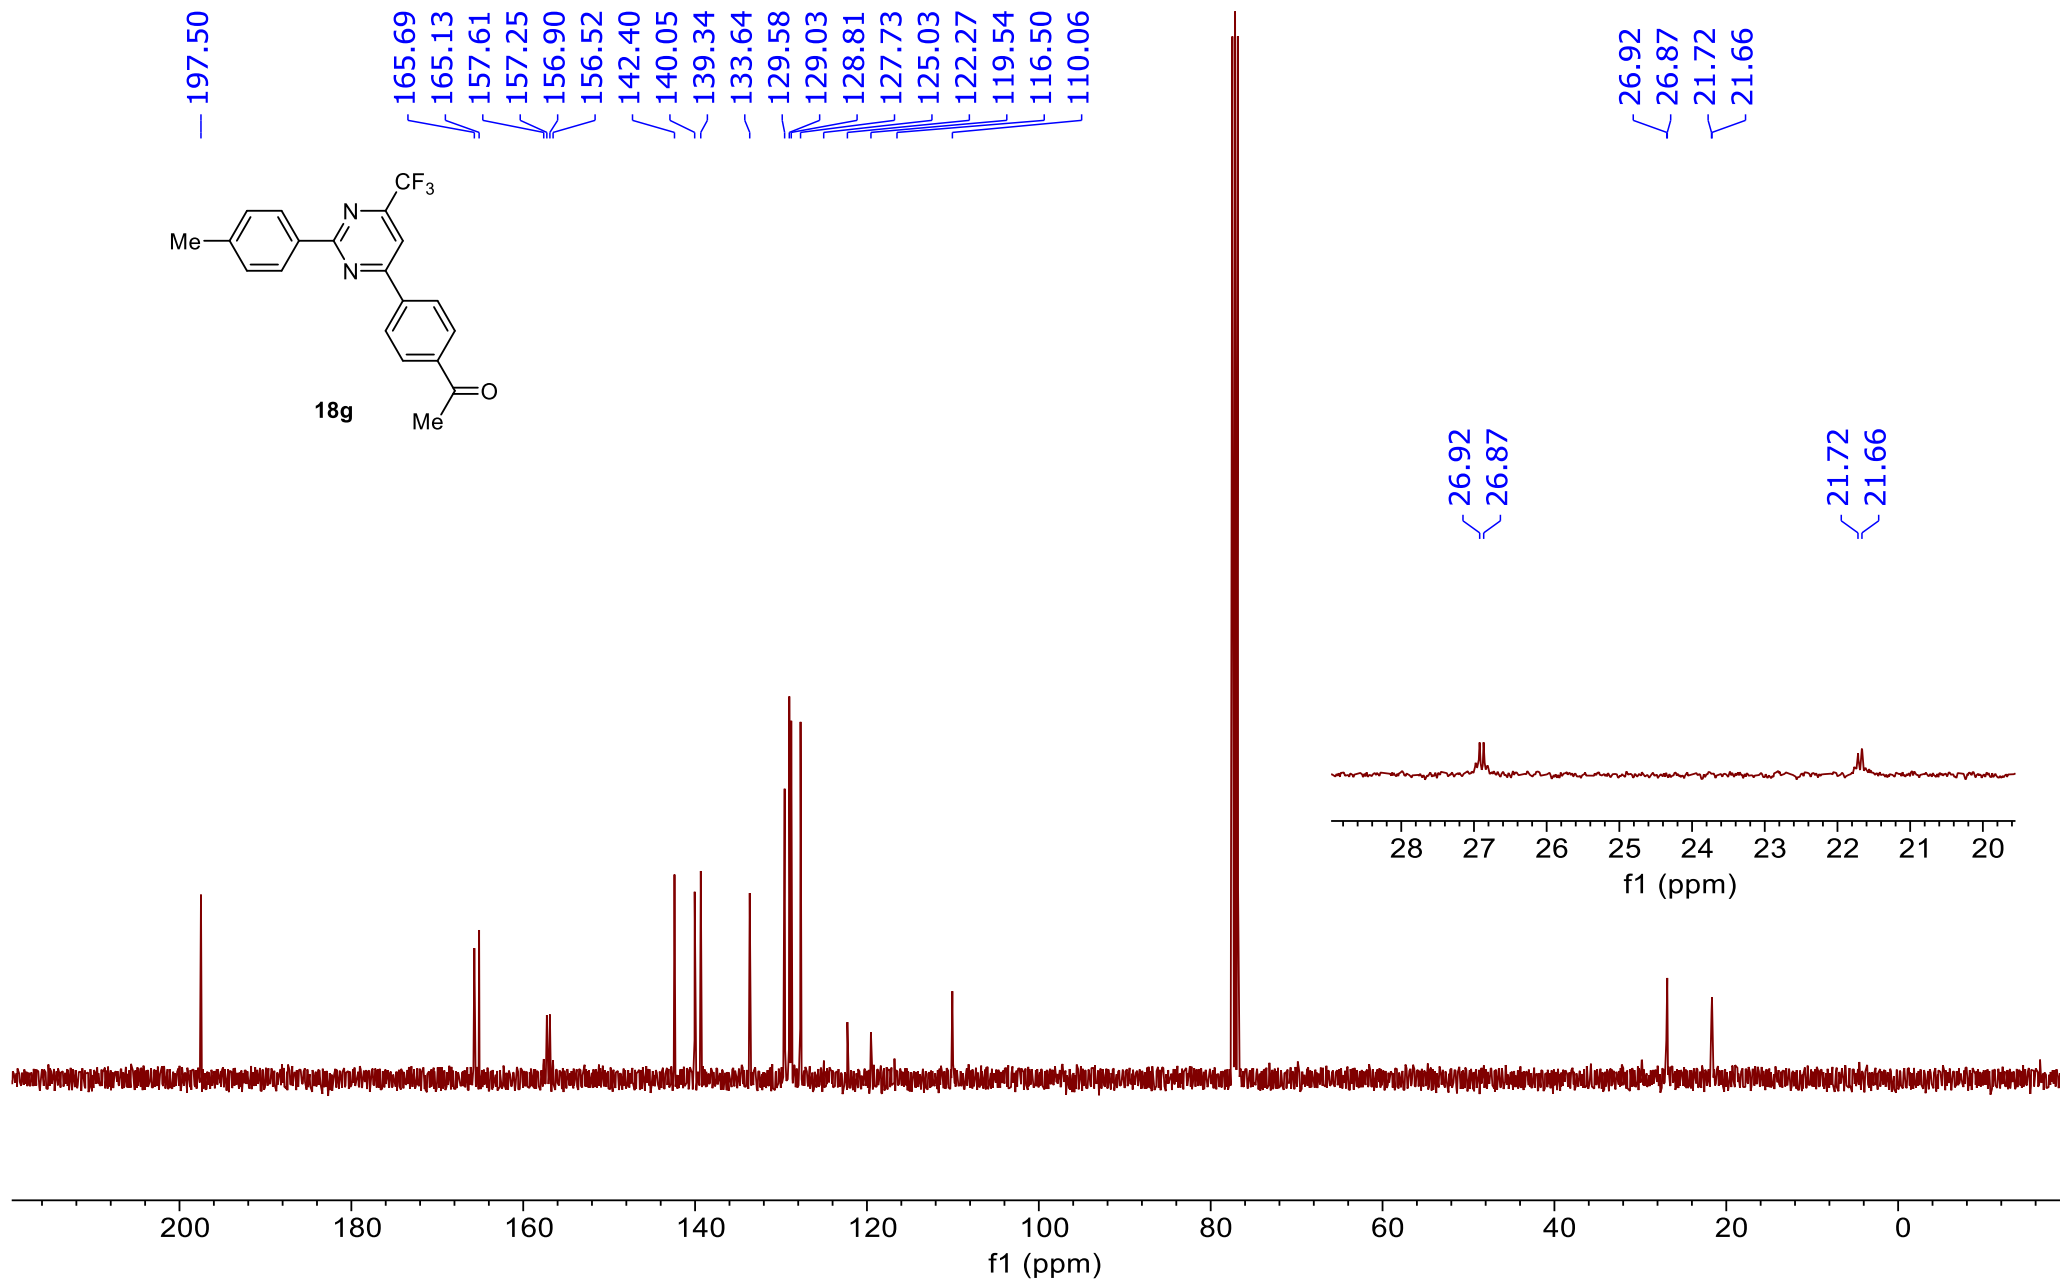

<sup>13</sup>C NMR Spectrum of **18g**

CDCl<sub>3</sub>, 376.46 MHz

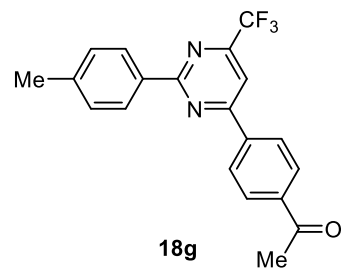

86.69

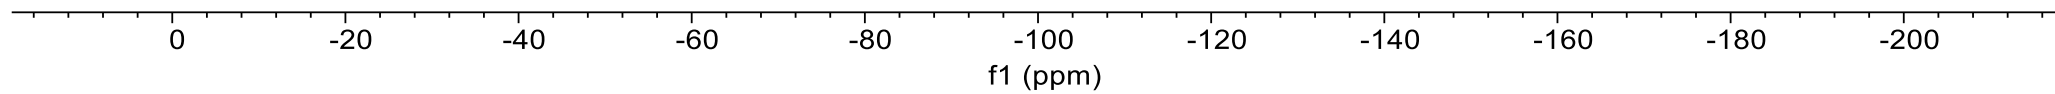

<sup>19</sup>F NMR Spectrum of **18g**

DMSO, 400.13 MHz

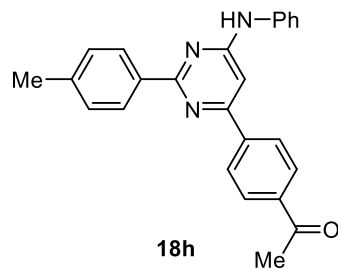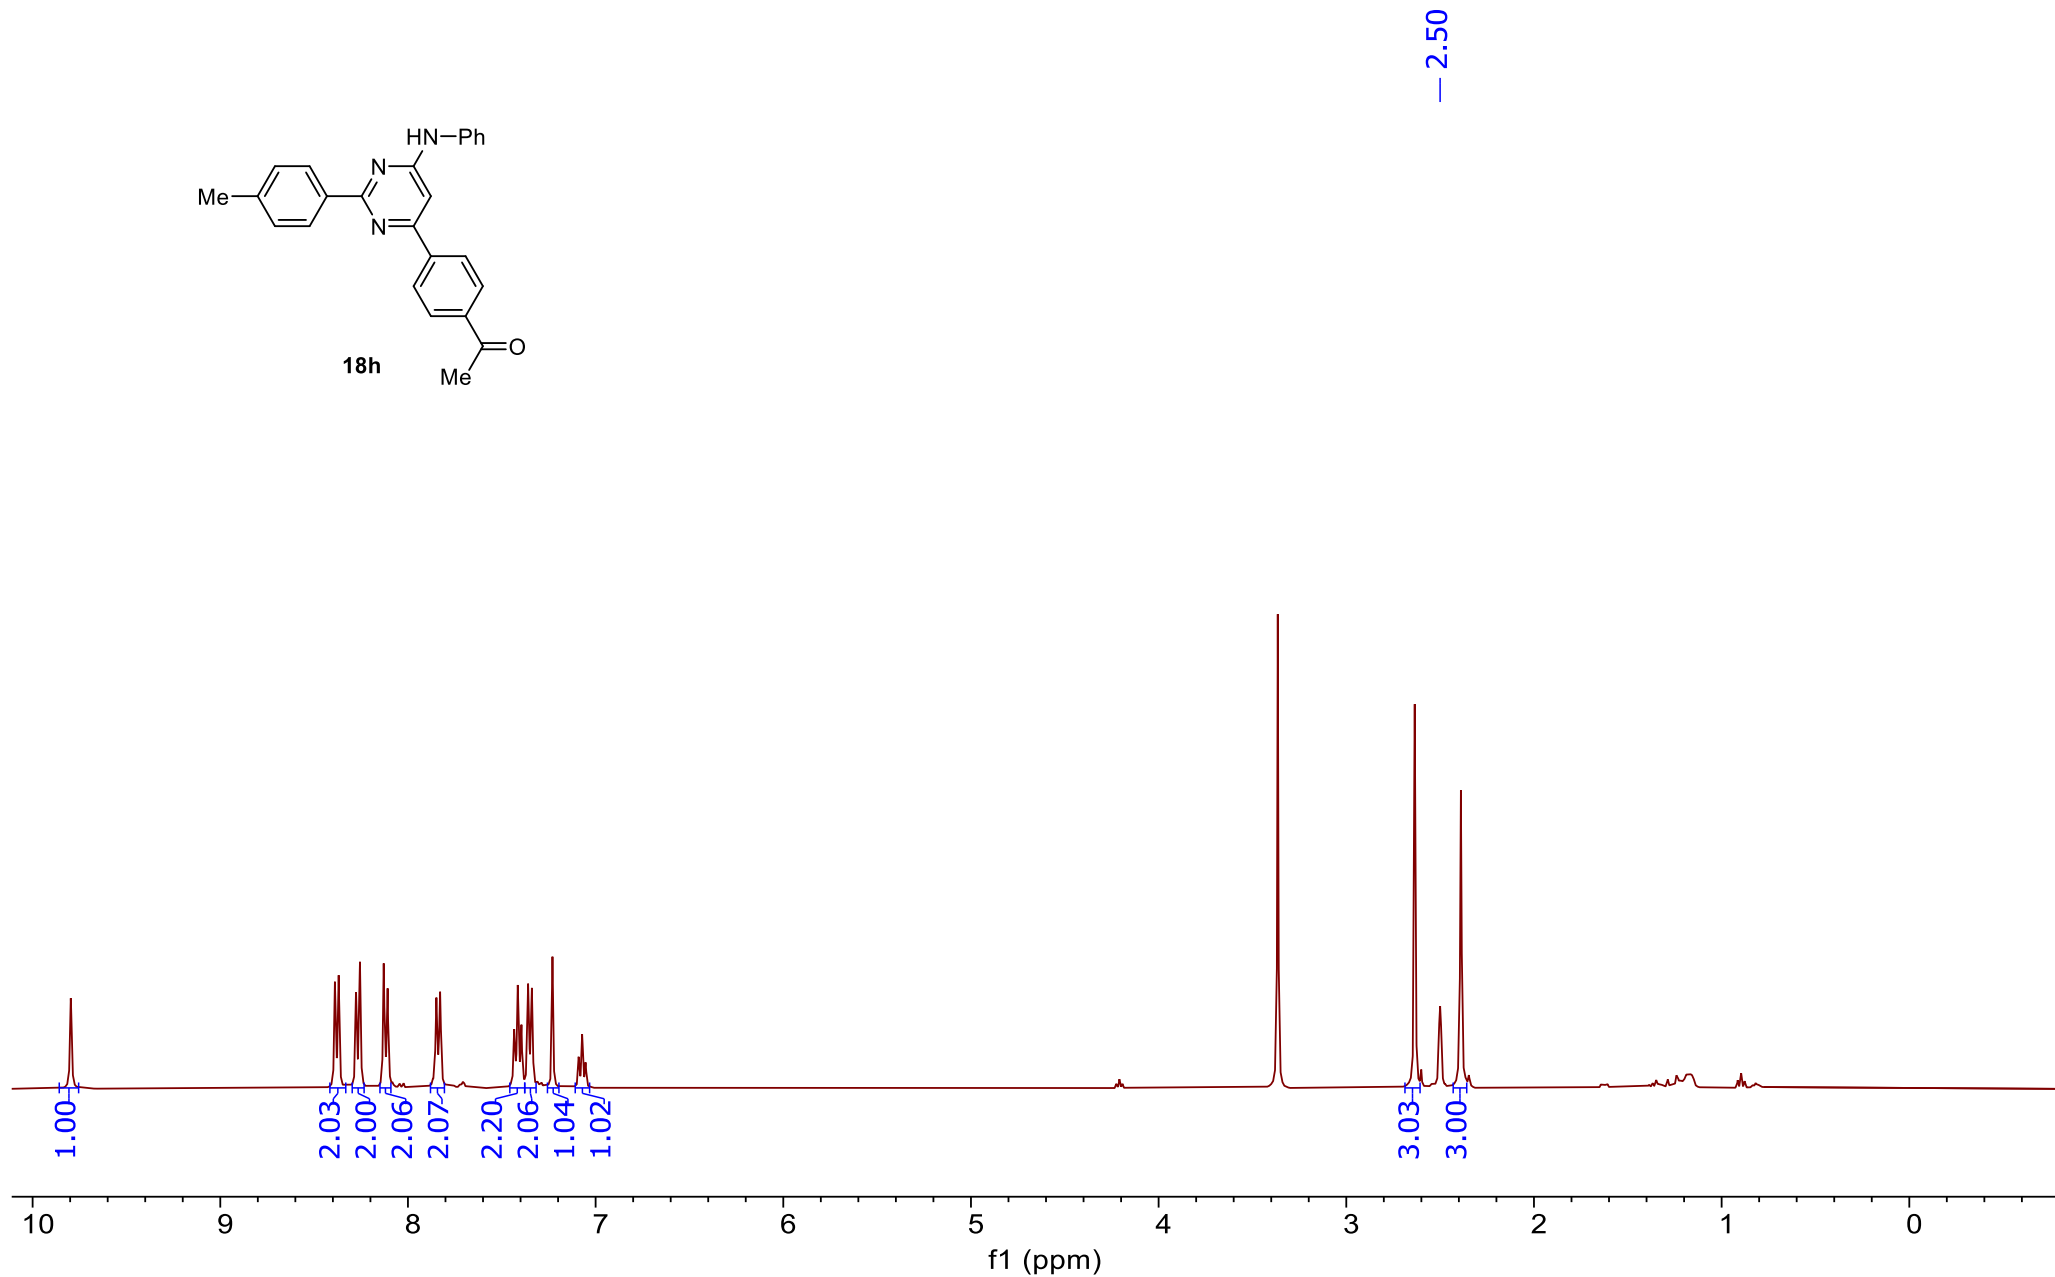

<sup>1</sup>H NMR Spectrum of **18h**



DMSO, 100.62 MHz

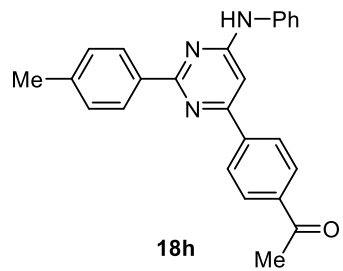

197.57

163.20  
161.39  
160.33

141.37  
140.36  
139.96  
137.86  
135.27  
129.14  
128.90  
128.76  
127.84  
126.75  
122.41  
119.76  
101.10

26.90  
26.83  
21.09  
21.02

26.90  
26.83

21.09  
21.02

28 27 26 25 24 23 22 21 20  
f1 (ppm)

200 180 160 140 120 100 80 60 40 20 0  
f1 (ppm)

<sup>13</sup>C NMR Spectrum of 18h

CDCl<sub>3</sub>, 400.13 MHz

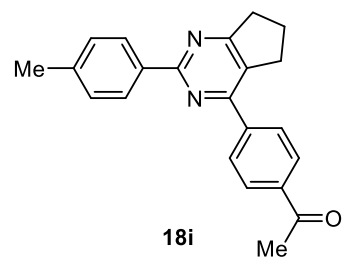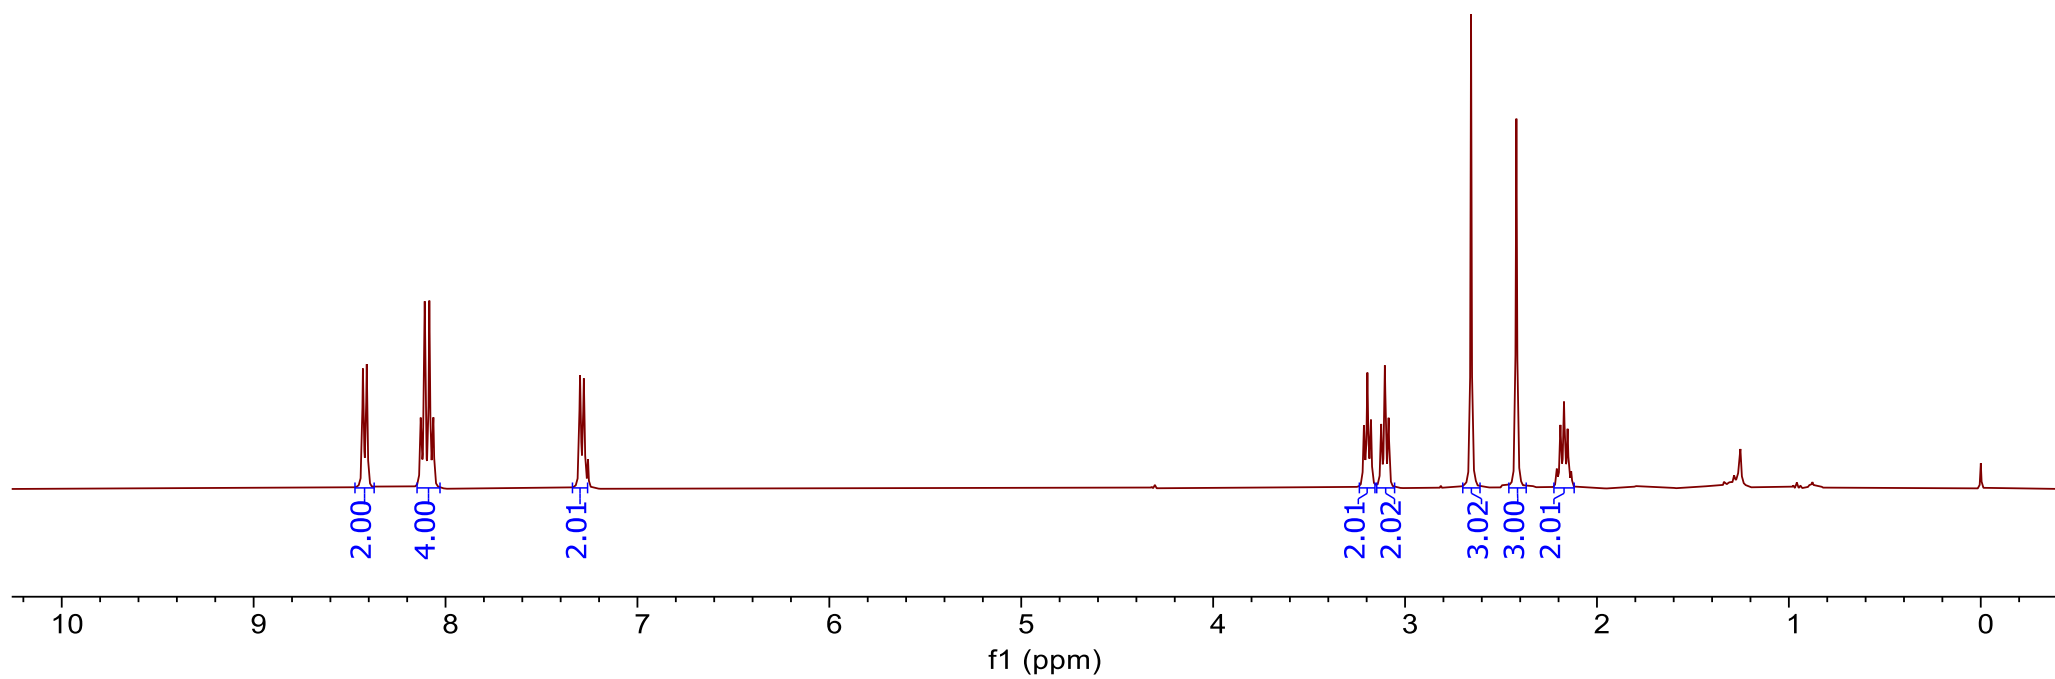

<sup>1</sup>H NMR Spectrum of **18i**

00:00

CDCl<sub>3</sub>, 100.62 MHz

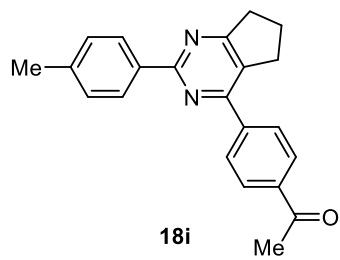

— 197.86  
— 177.03  
— 163.44  
— 158.08  
142.62  
140.59  
137.75  
135.39  
129.34  
129.22  
128.98  
128.51  
128.22

34.50  
30.93  
26.93  
26.87  
22.92  
21.62  
21.56

26.93  
26.87

22.92

21.62  
21.56

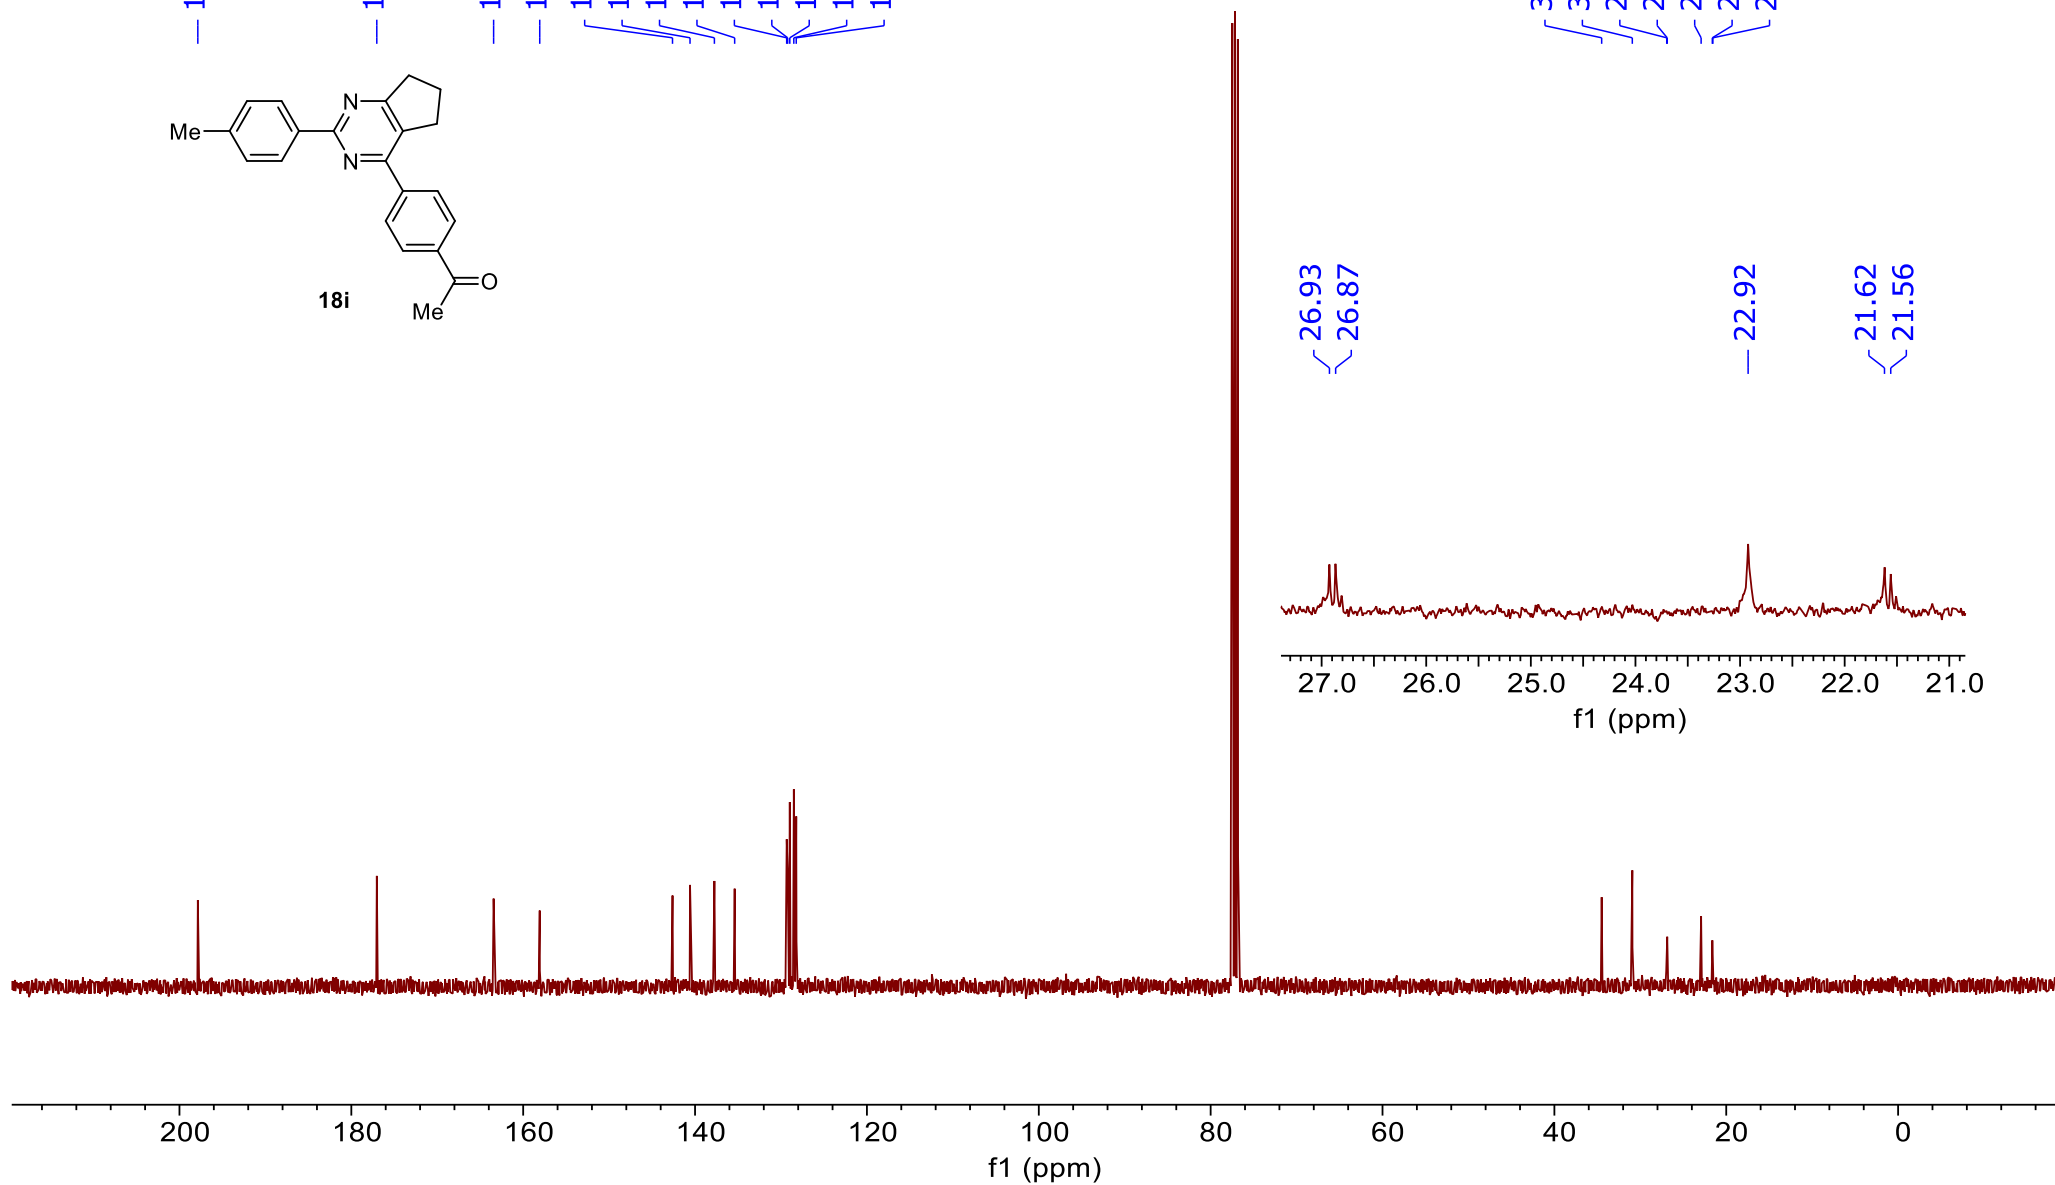

<sup>13</sup>C NMR Spectrum of **18i**

CDCl<sub>3</sub>, 400.13 MHz

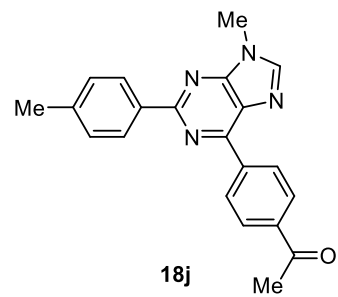

--0.00

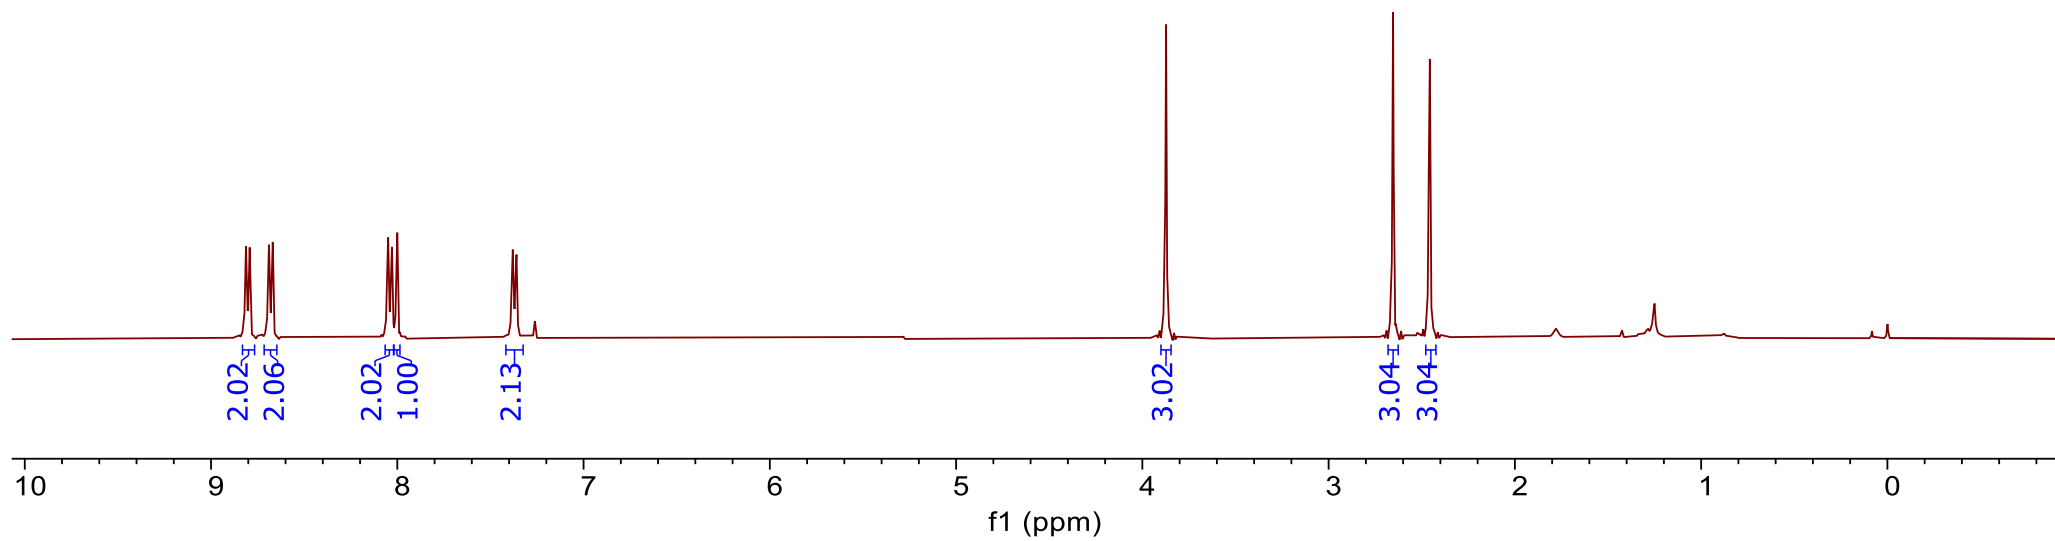

<sup>1</sup>H NMR Spectrum of **18j**

CDCl<sub>3</sub>, 100.62 MHz

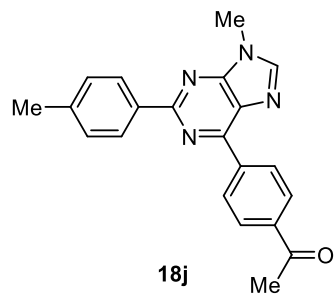

— 198.18

157.18  
154.15  
153.60  
145.14  
142.73  
141.49  
137.87  
133.28  
129.85  
129.75  
129.44  
128.47  
128.40

~ 29.75  
~ 26.92  
~ 21.75

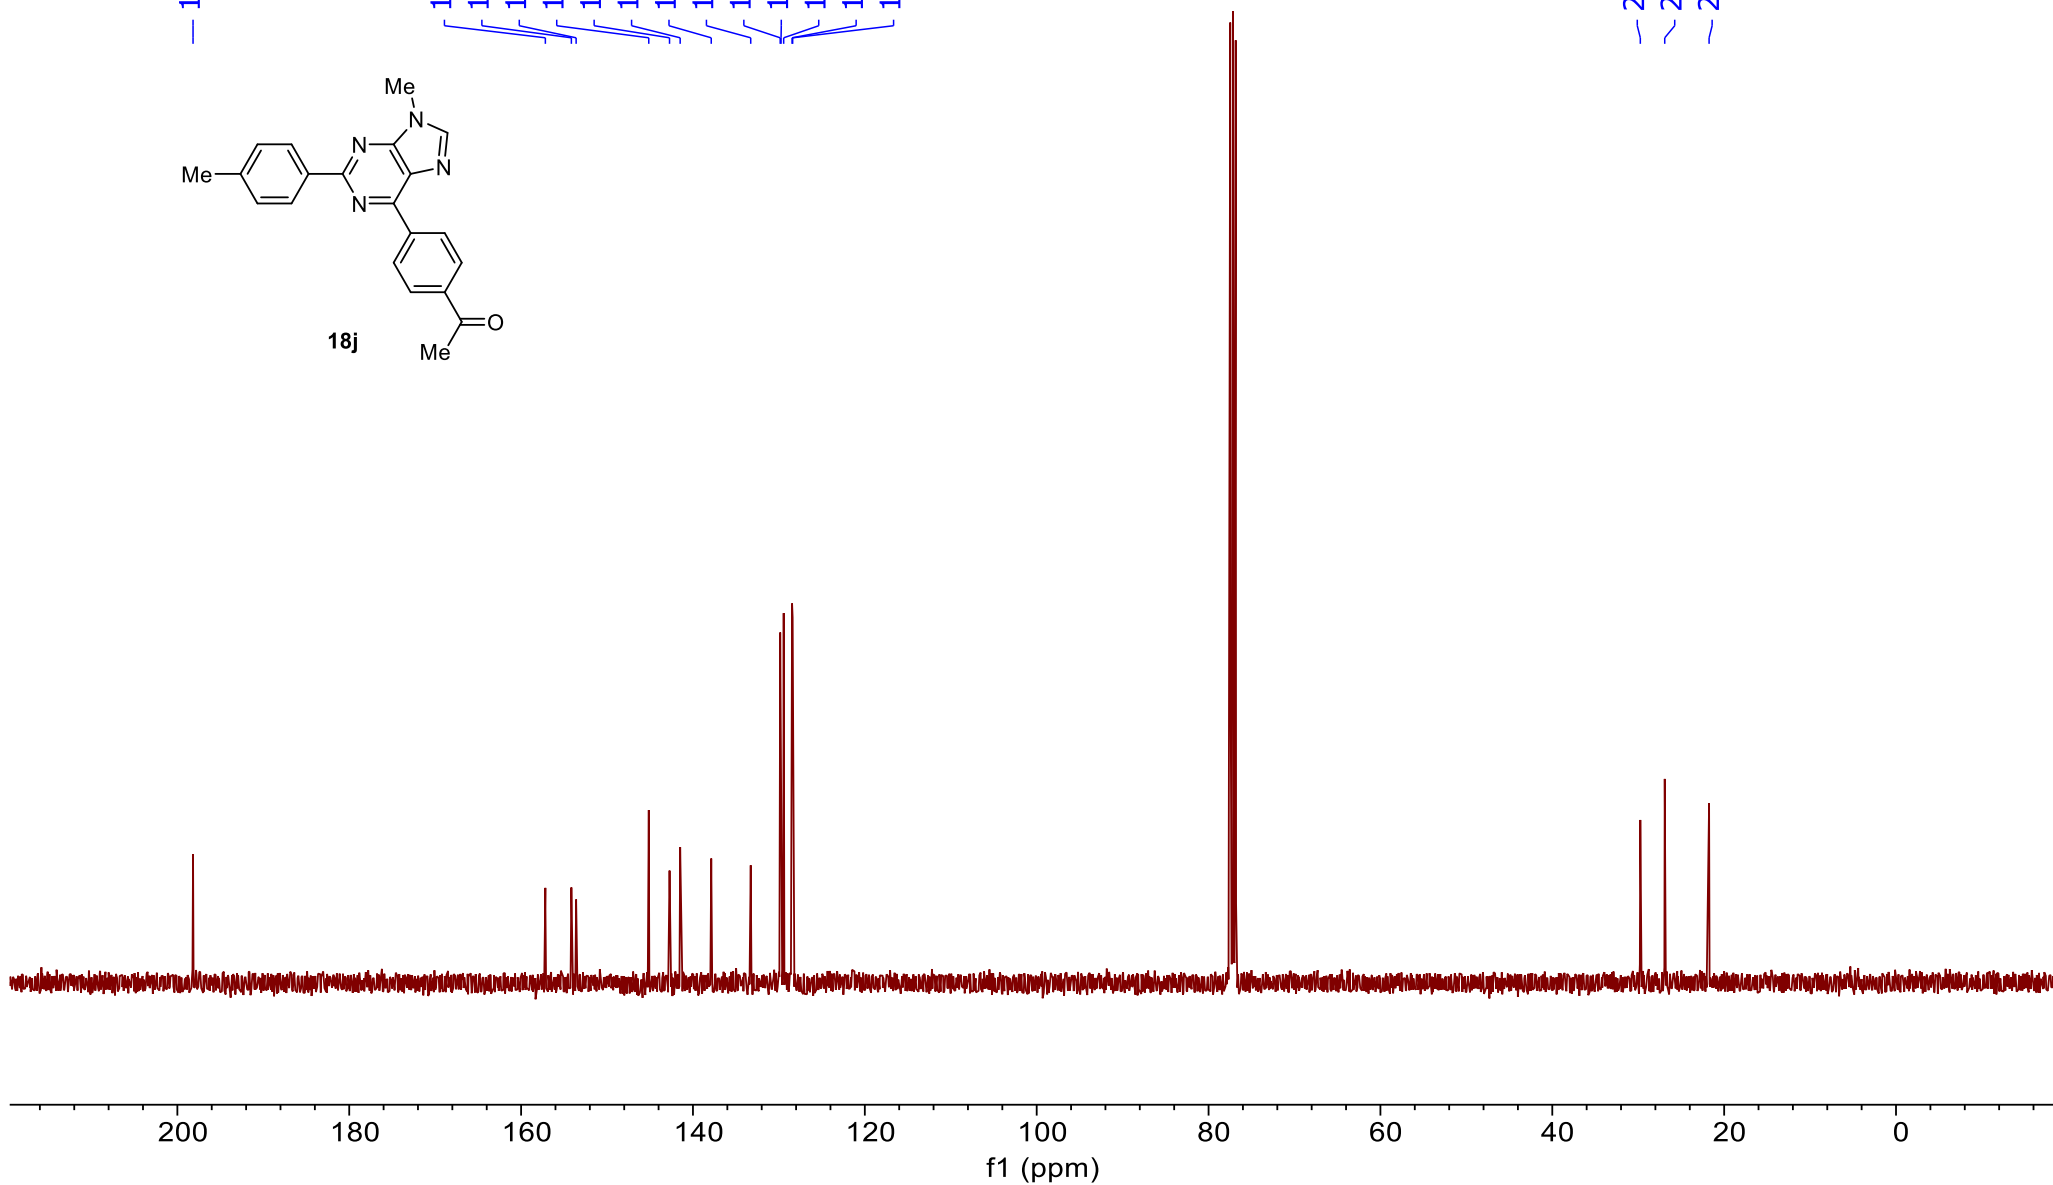

<sup>13</sup>C NMR Spectrum of **18j**

CDCl<sub>3</sub>, 400.13 MHz

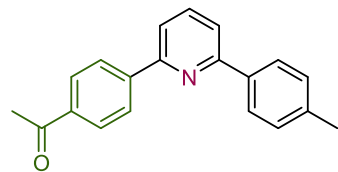

**20d**

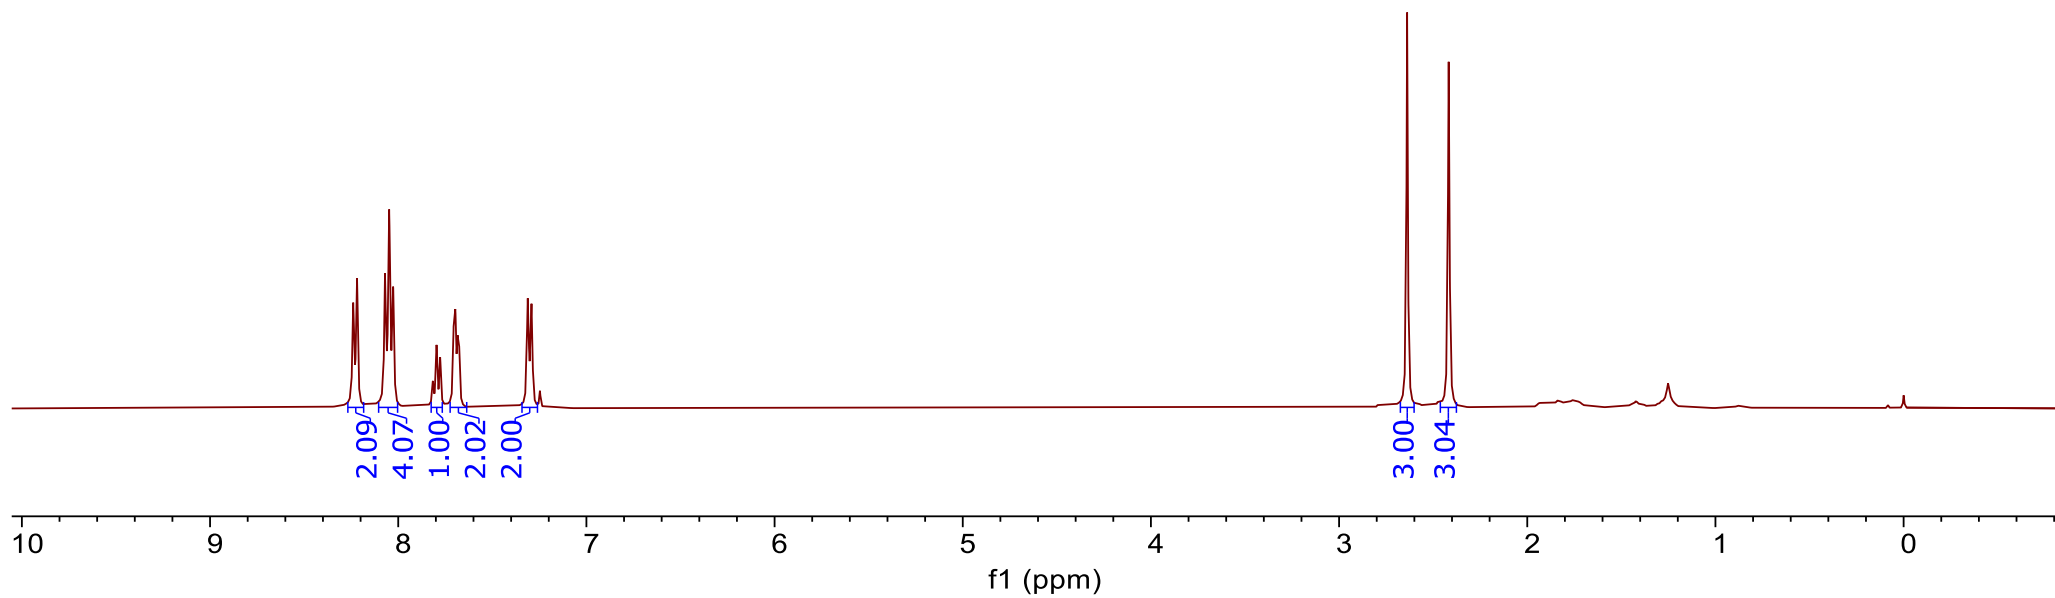

<sup>1</sup>H NMR Spectrum of **20d**

0.00

CDCl<sub>3</sub>, 100.62 MHz

— 197.99

143.90  
139.32  
137.67  
137.20  
136.50  
129.59  
128.85  
127.16  
126.95  
119.25  
118.92

— 26.85

— 21.42

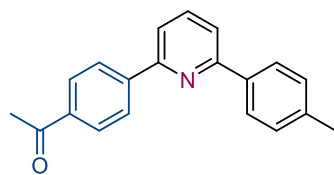

20d

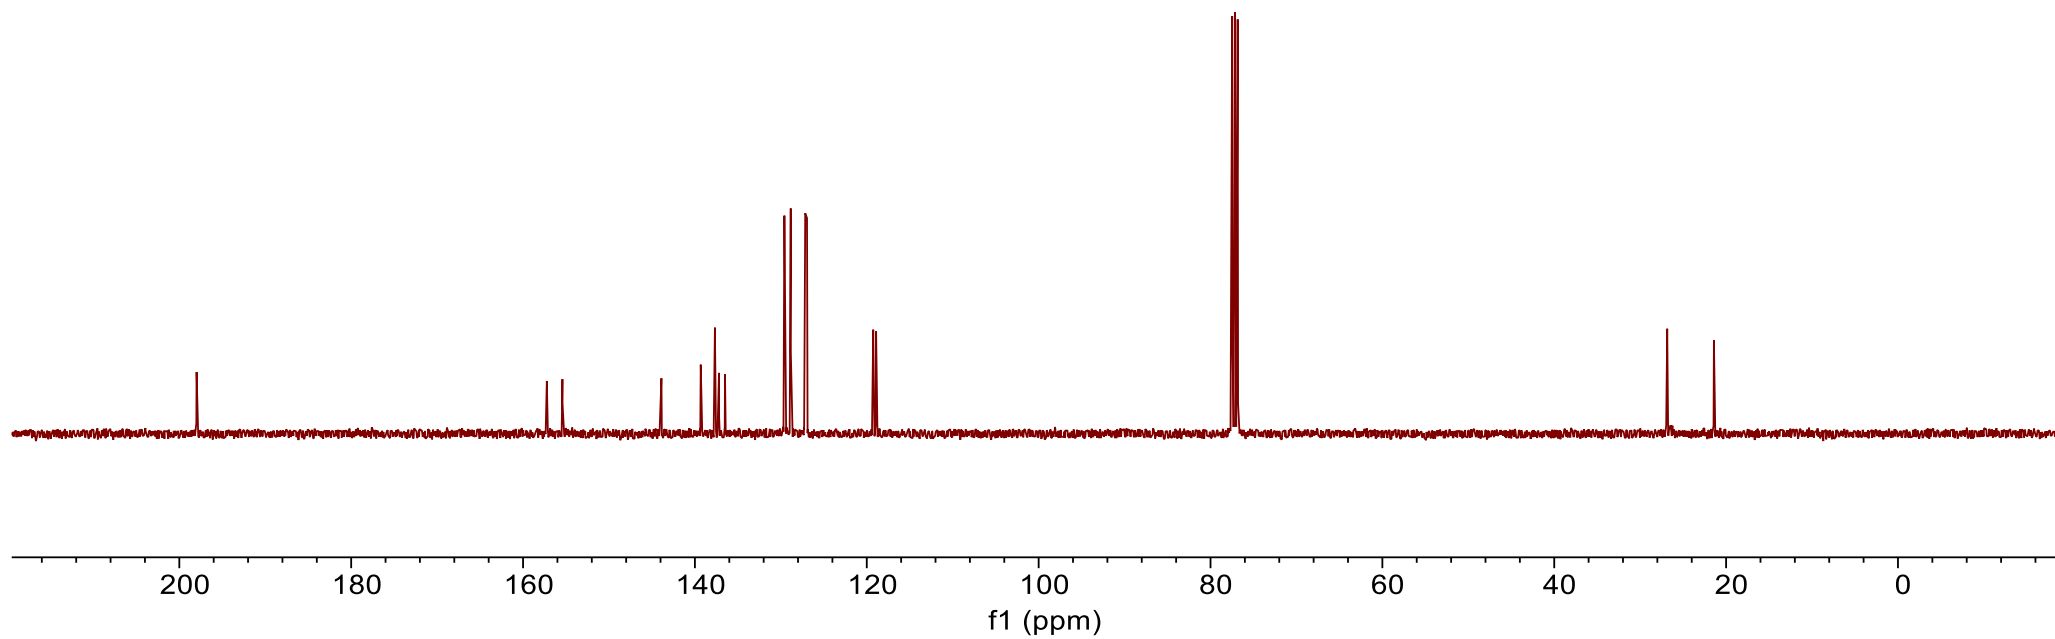

<sup>13</sup>C NMR Spectrum of 20d
